# Supplementary material for: Multi-omics elucidated parasite-host-microbiota interactions and resistance to Haemonchus contortus in sheep
Source: Research Square preprint supplement (doi:10.21203/rs.3.rs-3457910/v1), 2023-10-30
Supplement: Supplementary file 1 [file 8651aedfe31ba7b6fee6928b.xlsx]

## Sheet: TableS1
Table S1. edgeR analysis of differential gene expression from abomasum comparing H. contortus susceptible and resistant Morada Nova sheep. Differentially expressed genes (FDR > 0.05 and |FC| > 1.5) are in bold.
Gene	logFC	logCPM	PValue	FDR
gene-LOC114116426|LOC114116426	7.33683	-0.385654	2.05664e-08	0.000386566
gene-CCDC85B|CCDC85B	-8.95351	1.11375	1.11354e-07	0.00104651
gene-LOC101116991|LOC101116991	2.1652	3.45861	1.29864e-06	0.00598194
gene-LOC101104728|LOC101104728	8.3578	0.546014	1.49988e-06	0.00598194
gene-LOC121819799|LOC121819799	-6.6703	-0.881446	1.59128e-06	0.00598194
gene-LOC101107420|LOC101107420	3.98347	5.55563	2.34999e-06	0.00736173
gene-GNLY|GNLY	3.45234	6.08458	5.2542e-06	0.0141083
gene-GAST|GAST	-13.4274	5.49929	6.71239e-06	0.0157708
gene-GRP|GRP	9.08931	1.1636	1.11213e-05	0.0232262
gene-LOC101121371|LOC101121371	-3.14511	4.2795	1.36874e-05	0.0257267
gene-IL13|IL13	2.09831	1.16958	2.77317e-05	0.0473859
gene-LOC101106468|LOC101106468	-6.51604	-0.952806	3.43167e-05	0.0537514
gene-LOC121818086|LOC121818086	-3.48128	-0.617841	4.96637e-05	0.0718061
gene-LOC121818812|LOC121818812	2.67206	0.495259	5.8714e-05	0.0747321
gene-LOC105605770|LOC105605770	-1.31581	6.86683	5.96394e-05	0.0747321
gene-NKX6-3|NKX6-3	-10.4421	2.5669	9.297e-05	0.106426
gene-ONECUT3|ONECUT3	-10.3704	2.49805	9.62565e-05	0.106426
gene-LOC121818163|LOC121818163	1.82587	2.179	0.000198529	0.207309
gene-LOC121816030|LOC121816030	-1.97666	1.80751	0.000232002	0.223297
gene-TCAF2|TCAF2	1.2582	6.68895	0.000239673	0.223297
gene-LOC101107809|LOC101107809	1.65463	4.53316	0.000249481	0.223297
gene-LOC101110202|LOC101110202	-2.69752	3.55732	0.000279001	0.229099
gene-LOC121818066|LOC121818066	-7.138	-0.526165	0.000285642	0.229099
gene-KIAA0895|KIAA0895	1.65278	1.72681	0.000296664	0.229099
gene-LOC101106720|LOC101106720	1.57144	3.64048	0.000304718	0.229099
gene-RCAN1|RCAN1	0.998965	6.62908	0.000319504	0.230977
gene-PTN|PTN	-1.17611	3.8462	0.000348666	0.242723
gene-SPINK1|SPINK1	-8.65615	0.897651	0.000383421	0.257385
gene-ALPL|ALPL	0.998554	8.5998	0.000459725	0.297965
gene-TFF3|TFF3	2.23397	10.0536	0.000495419	0.309638
gene-LOC114118882|LOC114118882	0.861168	7.97967	0.000510682	0.309638
gene-GNGT1|GNGT1	6.53788	-1.05035	0.000610956	0.348066
gene-LOC105605766|LOC105605766	-1.06709	7.53203	0.000631785	0.348066
gene-LOC121816881|LOC121816881	0.80571	6.50686	0.000643306	0.348066
gene-NOX5|NOX5	0.957682	4.96262	0.000664414	0.348066
gene-TP53INP1|TP53INP1	0.749564	8.51912	0.000680959	0.348066
gene-PDX1|PDX1	-7.12224	2.2075	0.00068517	0.348066
gene-CLCA2|CLCA2	3.1076	0.402305	0.000712362	0.352357
gene-CLDN7|CLDN7	-2.34952	2.45738	0.000764778	0.368584
gene-LOC121816514|LOC121816514	1.25042	5.47723	0.000821263	0.385912
gene-CLEC4F|CLEC4F	-1.99417	0.148187	0.000864962	0.389785
gene-C2CD4D|C2CD4D	2.35564	-1.03084	0.00087098	0.389785
gene-TPSB2|TPSB2	1.98225	1.17134	0.00105155	0.456725
gene-LOC105609193|LOC105609193	-7.53337	-0.0795229	0.00114252	0.456725
gene-IGSF5|IGSF5	-0.544298	6.58851	0.0011615	0.456725
gene-LOC114109518|LOC114109518	-1.05291	4.48222	0.00118965	0.456725
gene-LOC121816515|LOC121816515	1.38339	8.90753	0.00121279	0.456725
gene-LOC101109915|LOC101109915	-1.70011	4.10915	0.00122166	0.456725
gene-DUOX1|DUOX1	1.47719	2.18642	0.00122785	0.456725
gene-LOC101110181|LOC101110181	-2.06665	4.88157	0.00122857	0.456725
gene-LOC101104401|LOC101104401	-2.94811	4.3771	0.00125338	0.456725
gene-LOC114112500|LOC114112500	-1.43646	1.90507	0.00127756	0.456725
gene-LOC101106610|LOC101106610	2.14631	6.23111	0.00128785	0.456725
gene-LOC121816554|LOC121816554	-2.53034	0.15312	0.00135061	0.470113
gene-CALN1|CALN1	-2.72638	1.94922	0.00138583	0.473603
gene-LOC121819086|LOC121819086	2.19306	-0.595326	0.00148241	0.484596
gene-LOC105616741|LOC105616741	2.86168	2.05865	0.00152483	0.484596
gene-LOC114108618|LOC114108618	-1.33234	7.29486	0.00155988	0.484596
gene-EPSTI1|EPSTI1	-1.30197	4.9318	0.0016313	0.484596
gene-LOC121817120|LOC121817120	-0.71308	4.83035	0.00163707	0.484596
gene-LOC121816895|LOC121816895	-1.93887	4.84602	0.00174872	0.484596
gene-KRT12|KRT12	-7.09106	-0.441491	0.0017561	0.484596
gene-CFTR|CFTR	1.20986	6.76987	0.00176433	0.484596
gene-ST3GAL1|ST3GAL1	0.90214	7.17132	0.0017866	0.484596
gene-IFIT2|IFIT2	-1.61999	5.47904	0.00179368	0.484596
gene-ABCC11|ABCC11	-6.09623	-1.19727	0.00182423	0.484596
gene-CRHBP|CRHBP	-7.03399	-0.487031	0.00184534	0.484596
gene-TPPP3|TPPP3	-1.45882	3.64052	0.00186714	0.484596
gene-LOC121818069|LOC121818069	-7.01936	-0.498658	0.00187759	0.484596
gene-LOC101111396|LOC101111396	-0.615635	4.50514	0.00190359	0.484596
gene-CBLN4|CBLN4	2.73922	-0.422864	0.0019122	0.484596
gene-LOC101123533|LOC101123533	-1.05399	4.43206	0.00191646	0.484596
gene-RSAD2|RSAD2	-2.39647	6.83308	0.00195856	0.484596
gene-FAM149A|FAM149A	0.577402	6.14873	0.00197371	0.484596
gene-OLFM4|OLFM4	-1.9834	9.80354	0.00201422	0.484596
gene-LOC101108705|LOC101108705	-3.34396	-0.726087	0.00202904	0.484596
gene-SLITRK6|SLITRK6	-1.22824	2.01727	0.00204617	0.484596
gene-LOC105605863|LOC105605863	-0.901217	4.30935	0.00204985	0.484596
gene-DUOX2|DUOX2	1.22248	7.73659	0.00205679	0.484596
gene-LOC114108712|LOC114108712	-1.9377	3.79449	0.00206255	0.484596
gene-HES6|HES6	1.48647	3.35579	0.0020948	0.486098
gene-DUOXA2|DUOXA2	1.47302	6.16379	0.00231844	0.527969
gene-CD7|CD7	-1.20604	2.81516	0.00233142	0.527969
gene-TFF1|TFF1	-0.978816	11.4165	0.00236209	0.528546
gene-B3GNT3|B3GNT3	-1.14635	4.024	0.00240307	0.53139
gene-LOC101107675|LOC101107675	2.66187	1.96855	0.00250131	0.541877
gene-LOC121816011|LOC121816011	-1.97063	4.6338	0.00250816	0.541877
gene-LOC101108669|LOC101108669	-0.872729	5.56188	0.00264421	0.555621
gene-LOC443162|LOC443162	1.34365	3.71166	0.00264684	0.555621
gene-TMEM72|TMEM72	1.25417	0.670001	0.002697	0.555621
gene-CYP2C18|CYP2C18	0.968345	2.73162	0.00271907	0.555621
gene-SFTPD|SFTPD	1.57625	3.64443	0.00271957	0.555621
gene-LOC101120875|LOC101120875	-0.892819	5.15028	0.0027733	0.560505
gene-LOC114116220|LOC114116220	-2.35404	1.12297	0.0028091	0.561701
gene-LOC121818758|LOC121818758	-6.63402	-0.797744	0.00287652	0.569127
gene-FMNL3|FMNL3	-0.525174	4.86888	0.00306653	0.581338
gene-SLC28A2|SLC28A2	4.24487	-0.0359148	0.00307613	0.581338
gene-LOC101107436|LOC101107436	-1.04545	1.82809	0.00311164	0.581338
gene-DCDC2|DCDC2	1.47703	0.480974	0.00312976	0.581338
gene-LOC105605118|LOC105605118	4.05331	-0.936744	0.00314113	0.581338
gene-LOC121816967|LOC121816967	-1.98275	2.82596	0.00318168	0.581338
gene-LOC101114456|LOC101114456	1.52711	3.83095	0.0032085	0.581338
gene-LOC101119588|LOC101119588	-1.27507	0.375159	0.003213	0.581338
gene-LOC121816966|LOC121816966	-1.87851	3.74511	0.0032166	0.581338
gene-LOC114114527|LOC114114527	-1.89327	-0.635162	0.00328486	0.585091
gene-NKAIN1|NKAIN1	0.99923	3.1009	0.00332941	0.585091
gene-MCP1|MCP1	1.39331	3.84105	0.00333075	0.585091
gene-SIX2|SIX2	-3.88486	-0.132519	0.00341442	0.58628
gene-RTP4|RTP4	-0.817614	5.16224	0.00341675	0.58628
gene-AXL|AXL	-0.562396	5.12556	0.00343109	0.58628
gene-FZD10|FZD10	-1.70759	0.595885	0.00354123	0.599649
gene-LOC101117021|LOC101117021	-1.03173	1.70781	0.00359683	0.603625
gene-CFD|CFD	-0.647952	5.23088	0.00365969	0.608739
gene-LOC101108297|LOC101108297	1.52182	9.70706	0.00379685	0.621164
gene-RGS6|RGS6	-0.929473	2.03758	0.00383174	0.621164
gene-PAPSS1|PAPSS1	0.498657	6.59376	0.00383353	0.621164
gene-DIO2|DIO2	1.51916	4.73169	0.00387379	0.622323
gene-LOC105604766|LOC105604766	1.68928	-0.652741	0.00403009	0.641936
gene-KBTBD11|KBTBD11	0.661533	6.11468	0.00406418	0.641936
gene-ASTN2|ASTN2	-1.87829	0.263129	0.00410761	0.642089
gene-LOC105606856|LOC105606856	-1.26683	2.84108	0.00413348	0.642089
gene-LOC114109533|LOC114109533	2.24144	-1.02936	0.00424503	0.652914
gene-LOC101103396|LOC101103396	-1.81225	3.01595	0.00427264	0.652914
gene-LOC101112122|LOC101112122	-1.2146	6.20413	0.00451647	0.678241
gene-LOC114118683|LOC114118683	-1.84903	-0.169948	0.00452916	0.678241
gene-CYP3A24|CYP3A24	-3.51441	-0.49212	0.0046236	0.678241
gene-LOC121819404|LOC121819404	1.81183	-0.575079	0.00462514	0.678241
gene-FCER1A|FCER1A	2.00846	0.561351	0.0046822	0.678241
gene-CD274|CD274	-0.980424	2.6798	0.0046876	0.678241
gene-CCL21|CCL21	-0.7722	4.12715	0.00472834	0.678241
gene-SELP|SELP	0.88943	2.55483	0.00473832	0.678241
gene-SLURP1|SLURP1	-2.33924	1.28669	0.00476313	0.678241
gene-SLC5A12|SLC5A12	2.91933	-0.236131	0.00481318	0.680214
gene-RHBDL2|RHBDL2	-1.68493	3.98688	0.00489202	0.685602
gene-INTU|INTU	0.83693	2.5042	0.00492425	0.685602
gene-TF|TF	0.95066	6.61846	0.00529314	0.715181
gene-ZNF831|ZNF831	-0.891497	2.47774	0.00537519	0.715181
gene-CCK|CCK	-4.59597	1.32578	0.00537882	0.715181
gene-CAPN14|CAPN14	1.38318	2.14923	0.00538417	0.715181
gene-LOC114111438|LOC114111438	-1.06047	2.1782	0.00542483	0.715181
gene-HERC5|HERC5	-0.879888	3.85771	0.00543895	0.715181
gene-LOC101117129|LOC101117129	1.51739	2.35604	0.00545869	0.715181
gene-GKN2|GKN2	-1.27429	11.3288	0.0054631	0.715181
gene-GTSF1|GTSF1	-4.40884	0.349603	0.0055037	0.715181
gene-LTBP4|LTBP4	-0.652528	7.35994	0.00557173	0.715181
gene-UNC5B|UNC5B	-0.770234	4.86835	0.00557429	0.715181
gene-EMILIN2|EMILIN2	-0.52104	4.75992	0.00563142	0.715181
gene-IFIT3|IFIT3	-1.51062	6.39662	0.00565905	0.715181
gene-ALOX12|ALOX12	0.6114	5.18507	0.00569969	0.715181
gene-MCTP1|MCTP1	0.70063	3.8298	0.00570745	0.715181
gene-ZFP42|ZFP42	-2.49191	-0.74966	0.00575855	0.716806
gene-ITGBL1|ITGBL1	-1.66217	0.423351	0.00589349	0.724573
gene-CASR|CASR	-1.51649	0.889843	0.00590015	0.724573
gene-KCNN2|KCNN2	-3.23039	-1.09577	0.00601048	0.724573
gene-ABCB9|ABCB9	0.639304	3.49002	0.00603105	0.724573
gene-COLEC10|COLEC10	2.48062	0.0407266	0.00606405	0.724573
gene-LOC114118886|LOC114118886	-0.90665	5.56076	0.00609933	0.724573
gene-SLC24A2|SLC24A2	-1.36824	1.2521	0.0061246	0.724573
gene-NUDT13|NUDT13	0.866959	3.45539	0.00612935	0.724573
gene-LOC105613035|LOC105613035	-2.39494	2.07327	0.0061921	0.727417
gene-FCER2|FCER2	1.02912	3.34951	0.00630601	0.732578
gene-PAX9|PAX9	-2.21276	-0.747968	0.0063468	0.732578
gene-LOC101112843|LOC101112843	-0.794231	4.65715	0.00637867	0.732578
gene-LOC114111046|LOC114111046	0.626986	4.5152	0.00639194	0.732578
gene-LOC101113715|LOC101113715	-3.94041	-0.475885	0.00653515	0.744453
gene-CUX2|CUX2	-2.07703	0.784477	0.00661796	0.749345
gene-SCN2A|SCN2A	-1.09459	1.42914	0.00676025	0.755234
gene-TH|TH	1.35129	2.10223	0.00678454	0.755234
gene-SLC4A4|SLC4A4	0.707068	4.41009	0.00679052	0.755234
gene-LOC121818997|LOC121818997	-0.825931	2.59677	0.0068824	0.760951
gene-AFMID|AFMID	-0.901152	3.5883	0.00703887	0.77318
gene-RET|RET	0.745063	5.71899	0.00710191	0.77318
gene-LOC105605834|LOC105605834	-1.29838	3.44929	0.00711642	0.77318
gene-LOC114116187|LOC114116187	-1.26513	2.16899	0.00729306	0.787818
gene-AHRR|AHRR	-0.918304	1.97023	0.00742095	0.794023
gene-KCNN4|KCNN4	-1.85029	4.04113	0.00747066	0.794023
gene-SOCS3|SOCS3	0.60348	4.83102	0.00747724	0.794023
gene-ZBP1|ZBP1	-0.878072	6.28118	0.00754796	0.795875
gene-NEUROG3|NEUROG3	-2.66683	1.14857	0.00757935	0.795875
gene-DQA|DQA	-0.986487	6.25434	0.00763979	0.797764
gene-PAMR1|PAMR1	-0.918141	2.20742	0.00780364	0.806415
gene-DEPTOR|DEPTOR	0.510437	5.59311	0.0078192	0.806415
gene-LOC101120367|LOC101120367	-0.86725	4.78248	0.00787238	0.806415
gene-PMAIP1|PMAIP1	-0.870453	3.99079	0.00789426	0.806415
gene-LOC101115949|LOC101115949	-1.40423	0.829947	0.00804817	0.817694
gene-BCL2L15|BCL2L15	-0.751353	4.16539	0.00821264	0.826168
gene-AXIN2|AXIN2	-0.527252	5.7206	0.00821948	0.826168
gene-HSPB8|HSPB8	-0.765335	3.86857	0.00847695	0.839769
gene-LOC101121646|LOC101121646	-1.03758	3.85483	0.00847774	0.839769
gene-LOC121816070|LOC121816070	-2.04427	-0.860995	0.00850211	0.839769
gene-HSPA6|HSPA6	-2.00237	3.19062	0.00853351	0.839769
gene-STAT1|STAT1	-0.510543	8.50222	0.00868557	0.847666
gene-CLDN3|CLDN3	-1.97081	0.0215411	0.00874412	0.847666
gene-GSTA1|GSTA1	1.02038	5.04249	0.00874905	0.847666
gene-LOC106991529|LOC106991529	-0.556959	6.84606	0.0088095	0.849146
gene-LOC101121216|LOC101121216	0.539582	4.64593	0.00890639	0.850568
gene-MANBA|MANBA	0.653901	4.61913	0.00891476	0.850568
gene-LOC101114579|LOC101114579	-0.982085	4.66144	0.00896643	0.851176
gene-PLAC8|PLAC8	-1.08255	4.26818	0.00909585	0.854559
gene-CLCA1|CLCA1	1.36014	10.9389	0.00911421	0.854559
gene-TENT5A|TENT5A	-0.728209	7.20451	0.00919201	0.854559
gene-PAX5|PAX5	-1.45679	2.44176	0.00923154	0.854559
gene-LOC101108756|LOC101108756	-1.15086	1.86943	0.00930028	0.854559
gene-LOC121818567|LOC121818567	-2.42958	1.07901	0.00933153	0.854559
gene-JAML|JAML	-0.684311	5.43018	0.00940841	0.854559
gene-NKX3-2|NKX3-2	-2.25999	1.48194	0.00940852	0.854559
gene-LOC101113346|LOC101113346	-1.09973	2.7716	0.0094354	0.854559
gene-HIC1|HIC1	-0.605204	3.54086	0.0095254	0.854559
gene-ARHGEF25|ARHGEF25	-0.493072	4.36015	0.0095591	0.854559
gene-LOC101112936|LOC101112936	-0.597482	4.94374	0.00958993	0.854559
gene-GJA9|GJA9	-1.96908	0.281732	0.00960012	0.854559
gene-C14H19orf54|C14H19orf54	0.55925	4.67085	0.00963856	0.854559
gene-GCNT1|GCNT1	0.587765	7.80012	0.0096961	0.855624
gene-TLL2|TLL2	1.00757	1.75929	0.0098983	0.869385
gene-LOC121817118|LOC121817118	-0.886717	3.30215	0.0101417	0.88608
gene-LOC101111631|LOC101111631	-0.882102	2.52408	0.0101827	0.88608
gene-LOC101113122|LOC101113122	3.20519	0.0773593	0.0102399	0.886956
gene-SCIN|SCIN	-0.754573	4.71602	0.0104936	0.904764
gene-PDE7B|PDE7B	-1.36443	3.6151	0.0106975	0.915492
gene-PLN|PLN	-0.683701	4.11117	0.0107293	0.915492
gene-THNSL1|THNSL1	0.564605	3.6028	0.0108126	0.915492
gene-LOC101106326|LOC101106326	1.60056	0.403087	0.0109129	0.915492
gene-LOC101121923|LOC101121923	-2.84139	-0.749743	0.0109901	0.915492
gene-IL1RL1|IL1RL1	1.02804	2.61903	0.0110255	0.915492
gene-ST3GAL4|ST3GAL4	1.06806	3.89393	0.0110312	0.915492
gene-PDZK1IP1|PDZK1IP1	0.681662	6.25306	0.0110493	0.915492
gene-CXCL10|CXCL10	-0.900253	6.27992	0.0110564	0.915492
gene-EPHA6|EPHA6	1.47351	0.319646	0.0111232	0.916984
gene-SGCD|SGCD	-0.837441	2.53745	0.011311	0.924518
gene-HCN3|HCN3	-0.987591	1.53828	0.0113821	0.924518
gene-TIFAB|TIFAB	-1.63768	-0.443697	0.0113985	0.924518
gene-STC2|STC2	1.25552	3.82729	0.0114301	0.924518
gene-LOC114115761|LOC114115761	-1.78043	-0.123378	0.0114634	0.924518
gene-DPYSL3|DPYSL3	-0.516178	5.48167	0.0115097	0.924518
gene-LOC101119509|LOC101119509	3.36487	-0.490519	0.0116372	0.930774
gene-SLC22A5|SLC22A5	0.640581	4.57772	0.0117649	0.936337
gene-HTR1B|HTR1B	1.42664	2.28627	0.0118199	0.936337
gene-MEIS2|MEIS2	-1.32547	4.02236	0.0119374	0.936337
gene-IGF2|IGF2	-0.427773	5.81595	0.0119551	0.936337
gene-DPT|DPT	-0.8505	5.33801	0.0119653	0.936337
gene-RTP3|RTP3	-1.53595	1.61771	0.0121195	0.936337
gene-SLC12A8|SLC12A8	0.568076	3.80598	0.0121724	0.936337
gene-FABP5|FABP5	-0.481904	7.53478	0.0121762	0.936337
gene-C21H11orf54|C21H11orf54	0.526939	6.11414	0.0121951	0.936337
gene-LOC105605720|LOC105605720	-1.23994	-0.0791958	0.0122345	0.936337
gene-LOC101117112|LOC101117112	-0.87733	8.28506	0.0122547	0.936337
gene-LOC121816974|LOC121816974	1.13144	0.689766	0.0123627	0.93644
gene-NRXN2|NRXN2	-1.55849	-0.0938659	0.0123795	0.93644
gene-LOC101106528|LOC101106528	-0.608104	5.73507	0.0124055	0.93644
gene-CLGN|CLGN	0.905469	2.73985	0.0125341	0.942364
gene-FAM174B|FAM174B	0.52568	7.30647	0.012683	0.949758
gene-LOC105604827|LOC105604827	0.959217	3.70782	0.0127389	0.950157
gene-LOC101113516|LOC101113516	1.64556	0.620142	0.0128742	0.956189
gene-IFI44L|IFI44L	-0.916335	5.70558	0.0129215	0.956189
gene-GKN1|GKN1	-0.972586	11.9797	0.0129824	0.956356
gene-LOC105612361|LOC105612361	-1.55929	5.64546	0.0130255	0.956356
gene-MAP7D2|MAP7D2	2.05098	0.636668	0.0131071	0.958604
gene-LOC121816487|LOC121816487	-2.01194	-0.979085	0.0132697	0.965908
gene-CXCL14|CXCL14	-0.63431	7.56492	0.0133846	0.965908
gene-RIIAD1|RIIAD1	1.11562	0.407961	0.0133914	0.965908
gene-IDO1|IDO1	-1.34837	4.63075	0.0134125	0.965908
gene-RNASE9|RNASE9	-2.23989	3.08514	0.0135578	0.972641
gene-C1QTNF9|C1QTNF9	-2.07679	-0.994835	0.0138557	0.990236
gene-C11H17orf67|C11H17orf67	-2.80798	-1.08259	0.0139174	0.990879
gene-LOC121817476|LOC121817476	-2.1337	-1.06601	0.014105	1
gene-LOC443027|LOC443027	-0.986069	3.3992	0.0142342	1
gene-TRPV4|TRPV4	-0.703792	4.00655	0.0142992	1
gene-ACE|ACE	-0.571107	4.89993	0.0145246	1
gene-FFAR2|FFAR2	1.10224	0.302833	0.0145846	1
gene-LOC121819455|LOC121819455	-1.81251	-0.62059	0.0148209	1
gene-LOC105602107|LOC105602107	-1.75537	-0.343974	0.0148311	1
gene-LOC105608356|LOC105608356	-0.81146	1.29939	0.0149348	1
gene-NUMBL|NUMBL	-0.689567	2.51571	0.015193	1
gene-LOC114113859|LOC114113859	-0.61228	4.42766	0.0152057	1
gene-LOC101102194|LOC101102194	-1.58437	6.05237	0.015291	1
gene-LOC101115905|LOC101115905	-0.425686	6.85904	0.0153162	1
gene-CDH2|CDH2	0.815405	3.03283	0.0153376	1
gene-PDK4|PDK4	0.992471	7.47985	0.0153816	1
gene-LOC101108803|LOC101108803	-0.475671	5.16201	0.0156844	1
gene-ADGRF4|ADGRF4	-1.09192	1.64038	0.0157489	1
gene-RAMP1|RAMP1	-1.09462	3.16798	0.0158221	1
gene-FITM2|FITM2	0.425816	5.14756	0.0158228	1
gene-DGKB|DGKB	1.49101	1.82736	0.0158317	1
gene-IL22RA1|IL22RA1	-0.763019	5.36369	0.0158419	1
gene-CADM1|CADM1	-0.973215	4.52968	0.015864	1
gene-TBX1|TBX1	-1.06809	0.675399	0.016727	1
gene-CD3D|CD3D	-0.611768	4.92407	0.0168099	1
gene-ME2|ME2	0.418894	6.33504	0.0169555	1
gene-GRIN1|GRIN1	0.515248	4.99065	0.0169564	1
gene-FGF13|FGF13	-1.22394	0.959995	0.0172795	1
gene-LOC101114663|LOC101114663	1.0933	1.80741	0.0173998	1
gene-GLI2|GLI2	0.778105	4.21817	0.0174533	1
gene-PLSCR1|PLSCR1	-0.74055	5.65187	0.01754	1
gene-CRISP2|CRISP2	1.3673	4.3271	0.0176385	1
gene-SSTR2|SSTR2	0.81926	3.15115	0.0178985	1
gene-GPR55|GPR55	-0.997	2.90724	0.0180224	1
gene-NPNT|NPNT	-0.63063	4.67674	0.0180547	1
gene-CPVL|CPVL	1.24652	0.499341	0.0180592	1
gene-GPR34|GPR34	-0.727911	2.424	0.0181262	1
gene-ZNF23|ZNF23	-0.48082	4.43643	0.0184597	1
gene-OXER1|OXER1	1.60311	-0.389997	0.0186584	1
gene-SFTPB|SFTPB	1.15007	2.70099	0.0186601	1
gene-PTPRH|PTPRH	-0.611537	5.41655	0.0187051	1
gene-ODF2L|ODF2L	0.481641	3.99265	0.018759	1
gene-LOC114109662|LOC114109662	0.564815	5.41106	0.0189559	1
gene-HCRTR1|HCRTR1	-0.81195	1.34378	0.0193781	1
gene-LOC101111303|LOC101111303	1.16654	-0.0595535	0.0194509	1
gene-MAPK13|MAPK13	0.524146	5.26926	0.0194621	1
gene-EVA1C|EVA1C	0.929671	2.21916	0.0194671	1
gene-GPR31|GPR31	-1.16163	1.73815	0.019491	1
gene-SGK1|SGK1	0.656726	7.00032	0.0195819	1
gene-CD8A|CD8A	-0.836435	4.67591	0.019672	1
gene-MUCL3|MUCL3	-1.07012	11.1694	0.0197255	1
gene-FNIP2|FNIP2	0.714038	6.55431	0.0198261	1
gene-ILDR1|ILDR1	-2.26761	0.533639	0.0199127	1
gene-MFSD9|MFSD9	-0.40444	5.74113	0.0200403	1
gene-LOC101117691|LOC101117691	-1.47856	1.82106	0.020288	1
gene-LOC114110138|LOC114110138	-0.593189	4.98766	0.0202898	1
gene-APOBEC3A|APOBEC3A	-0.74324	5.15739	0.0204129	1
gene-LOC101114747|LOC101114747	-1.03244	1.6865	0.0205936	1
gene-LOC114111465|LOC114111465	-0.862681	0.874602	0.0206225	1
gene-KRT20|KRT20	-1.37299	6.90232	0.0207857	1
gene-GNAI1|GNAI1	-0.563732	4.55686	0.0208012	1
gene-TRIM14|TRIM14	-0.503561	6.01516	0.020806	1
gene-LOC101122319|LOC101122319	-0.7789	2.62462	0.0211388	1
gene-CD244|CD244	-0.743874	5.3855	0.0212852	1
gene-ALOX5|ALOX5	0.599163	5.21221	0.0214354	1
gene-BZW2|BZW2	0.401129	7.31267	0.0214553	1
gene-HRH4|HRH4	1.64972	-0.577294	0.0215117	1
gene-XAF1|XAF1	-0.681333	4.97698	0.0215279	1
gene-LOC114116813|LOC114116813	-3.44765	-0.0434172	0.021551	1
gene-LOC101117763|LOC101117763	-0.62538	3.3484	0.0216825	1
gene-LOC114113630|LOC114113630	-2.34305	3.90373	0.0217106	1
gene-TRPC5|TRPC5	0.949313	0.749249	0.0217542	1
gene-CD6|CD6	-0.717873	5.40632	0.0217767	1
gene-LOC114117238|LOC114117238	-0.981648	3.11862	0.0218074	1
gene-LOC121818836|LOC121818836	-1.22542	-0.25914	0.0219158	1
gene-LOC101104006|LOC101104006	-1.42963	0.387929	0.0222377	1
gene-LOC101114032|LOC101114032	2.09054	1.13568	0.0222386	1
gene-LOC121818288|LOC121818288	-1.35273	0.228867	0.02224	1
gene-LURAP1L|LURAP1L	-0.655542	3.74154	0.0223319	1
gene-PARP9|PARP9	-0.507657	6.25701	0.022445	1
gene-LOC121820478|LOC121820478	-0.654833	2.98569	0.0224725	1
gene-RHEX|RHEX	0.955406	2.51836	0.0226394	1
gene-HTATIP2|HTATIP2	0.44402	4.86466	0.0227783	1
gene-SLCO2B1|SLCO2B1	-0.458646	5.37405	0.022835	1
gene-LOC101113672|LOC101113672	-1.72278	2.78342	0.022929	1
gene-MUC2|MUC2	-0.795182	5.82523	0.0229846	1
gene-CCL28|CCL28	0.944823	1.54411	0.0230507	1
gene-IFIT5|IFIT5	-0.63586	6.0041	0.0230552	1
gene-DPP4|DPP4	0.465933	6.40092	0.0231442	1
gene-ABHD1|ABHD1	-0.60618	3.83624	0.0232537	1
gene-CLDN4|CLDN4	-0.946487	4.71411	0.0234015	1
gene-PARP14|PARP14	-0.541345	7.36363	0.0234105	1
gene-LOC121818518|LOC121818518	-0.964858	1.43227	0.0235876	1
gene-GPT2|GPT2	0.52143	8.19342	0.0236295	1
gene-LOC105610529|LOC105610529	-2.37272	-0.880021	0.0237054	1
gene-IFI44|IFI44	-0.534537	5.70428	0.0238877	1
gene-SYT2|SYT2	-1.15518	1.96542	0.0239117	1
gene-LOC105602911|LOC105602911	-0.906111	7.87519	0.0239145	1
gene-AIF1L|AIF1L	0.665061	6.09096	0.0239763	1
gene-ATP1A1|ATP1A1	0.444139	9.67369	0.0240397	1
gene-GSPT2|GSPT2	-0.736396	2.02185	0.0240808	1
gene-PLD4|PLD4	-0.699847	3.38697	0.0241875	1
gene-LOC114113831|LOC114113831	1.64696	-0.979308	0.0242125	1
gene-FHL1|FHL1	-0.541505	7.33238	0.0242207	1
gene-LOC101102057|LOC101102057	1.25154	2.02179	0.0243104	1
gene-C2H9orf64|C2H9orf64	-0.471269	4.41268	0.02435	1
gene-CTSW|CTSW	-0.619836	4.73759	0.0243821	1
gene-C26H8orf48|C26H8orf48	0.865125	1.42704	0.024702	1
gene-MSX2|MSX2	-1.18389	3.91939	0.024848	1
gene-NEIL2|NEIL2	0.643393	4.28093	0.0248534	1
gene-F2RL1|F2RL1	-0.741435	4.22411	0.0250741	1
gene-CCL5|CCL5	-0.826062	5.9086	0.0250923	1
gene-LOC101121256|LOC101121256	-0.693104	3.79528	0.0251022	1
gene-MEIS1|MEIS1	-1.24499	3.05744	0.0251092	1
gene-ASPG|ASPG	-2.02509	-0.415707	0.025123	1
gene-SYT1|SYT1	-1.49531	-0.486301	0.0253229	1
gene-CMTR2|CMTR2	-0.648825	4.74324	0.0253535	1
gene-TFF2|TFF2	-1.57783	7.89121	0.0253904	1
gene-TPH1|TPH1	0.844119	2.53063	0.0254229	1
gene-MGAT3|MGAT3	0.737216	3.75246	0.0254339	1
gene-LOC101111695|LOC101111695	-1.26961	-0.510104	0.0254592	1
gene-CARD11|CARD11	-0.372759	5.41929	0.0257849	1
gene-SPG21|SPG21	0.404245	5.45404	0.0259439	1
gene-LOC105613401|LOC105613401	-4.78676	1.18523	0.0259908	1
gene-LOC101106134|LOC101106134	-1.26457	1.72891	0.0262016	1
gene-ZNF19|ZNF19	0.496267	3.66115	0.0262737	1
gene-IRS2|IRS2	0.484074	5.74835	0.0264109	1
gene-AMN|AMN	-1.81273	-0.871055	0.0264359	1
gene-CELF2|CELF2	-0.42429	5.61543	0.0266932	1
gene-PRTFDC1|PRTFDC1	0.568202	3.63133	0.0267223	1
gene-SH3D21|SH3D21	0.4569	4.7925	0.0267434	1
gene-B3GNT6|B3GNT6	-0.686414	3.77833	0.026971	1
gene-KL|KL	-1.37202	1.71408	0.0270129	1
gene-MELTF|MELTF	-1.49345	2.67598	0.0270795	1
gene-XCL1|XCL1	-0.754158	2.79755	0.0270995	1
gene-KITLG|KITLG	0.501295	6.26309	0.0272214	1
gene-ANKRD6|ANKRD6	-0.586856	3.52602	0.0272459	1
gene-IRF9|IRF9	-0.378523	7.18795	0.027331	1
gene-LOC121816568|LOC121816568	-0.517741	4.48026	0.027336	1
gene-LOC101105069|LOC101105069	1.8604	-1.02288	0.0274819	1
gene-TSEN2|TSEN2	-0.370625	5.42102	0.0275387	1
gene-P2RY6|P2RY6	-0.951857	1.33574	0.027548	1
gene-LOC105603225|LOC105603225	-0.52941	9.07787	0.0275627	1
gene-ABCA13|ABCA13	-1.33454	0.571209	0.0275639	1
gene-TSPYL2|TSPYL2	0.358767	4.97482	0.0277268	1
gene-DUOXA1|DUOXA1	1.22117	2.23144	0.0277977	1
gene-WNT5A|WNT5A	-0.554678	4.85627	0.0278412	1
gene-CTSO|CTSO	-0.426374	5.29975	0.0278641	1
gene-CDKN1A|CDKN1A	-0.506351	6.43225	0.0280019	1
gene-LOC101123113|LOC101123113	-1.19287	0.799305	0.028333	1
gene-CD79A|CD79A	-0.432792	4.23036	0.0284813	1
gene-PDE6C|PDE6C	1.19143	0.400706	0.0287478	1
gene-HBB|HBB	4.2347	0.593802	0.0288937	1
gene-TRPS1|TRPS1	-0.459028	4.04788	0.0289253	1
gene-LOC121820316|LOC121820316	0.818829	1.9739	0.0291973	1
gene-LOC114109611|LOC114109611	-0.960582	7.15228	0.029202	1
gene-MSMB|MSMB	-2.30034	5.39356	0.0292643	1
gene-C24H16orf89|C24H16orf89	-2.36517	-1.11163	0.0294423	1
gene-IGFBP3|IGFBP3	-0.546278	7.53989	0.0297321	1
gene-ANK2|ANK2	-0.626547	4.02272	0.029768	1
gene-TNFRSF11B|TNFRSF11B	1.69364	1.30493	0.0300889	1
gene-SCRG1|SCRG1	1.51838	0.938108	0.0301731	1
gene-LOC121819150|LOC121819150	1.26047	2.04652	0.0302741	1
gene-KIF16B|KIF16B	0.534069	4.70655	0.0303797	1
gene-LOC121817874|LOC121817874	-1.22106	1.63894	0.0304397	1
gene-LOC121817863|LOC121817863	0.726743	4.95297	0.0305668	1
gene-LOC101108901|LOC101108901	1.33667	5.68842	0.0306264	1
gene-FOLH1B|FOLH1B	-1.37485	1.58372	0.0306649	1
gene-MZB1|MZB1	0.557552	5.73592	0.0308385	1
gene-RGS16|RGS16	0.970812	2.31608	0.0309998	1
gene-LOC105604785|LOC105604785	-1.69655	1.41584	0.0310611	1
gene-BMP5|BMP5	-0.613847	3.79891	0.0312149	1
gene-FHIP1A|FHIP1A	0.350517	5.11576	0.0314698	1
gene-LOC114113923|LOC114113923	0.892153	0.654803	0.0315517	1
gene-FOXI1|FOXI1	-1.35885	0.0441138	0.0319354	1
gene-LOC114118858|LOC114118858	-1.8294	0.976223	0.0319665	1
gene-DDX58|DDX58	-0.774112	5.62132	0.0320813	1
gene-LOC101121062|LOC101121062	-0.581391	3.88576	0.0321134	1
gene-TACSTD2|TACSTD2	-0.774427	6.15364	0.0323218	1
gene-SLC35A2|SLC35A2	-0.615032	4.90648	0.032369	1
gene-ZNFX1|ZNFX1	-0.583872	7.34403	0.0324289	1
gene-LOC105613000|LOC105613000	-1.57392	-0.111879	0.0325509	1
gene-LOC121820552|LOC121820552	-1.07758	1.91476	0.0325887	1
gene-CD96|CD96	-0.770477	4.10418	0.0326576	1
gene-RELN|RELN	-0.951384	2.19256	0.0327444	1
gene-LOC114108767|LOC114108767	-1.18509	0.668557	0.032748	1
gene-CIART|CIART	0.722154	2.19502	0.0327996	1
gene-NIPSNAP1|NIPSNAP1	0.431621	6.27429	0.0328559	1
gene-TMEM176A|TMEM176A	-0.379807	5.49739	0.0329718	1
gene-IKZF3|IKZF3	-0.427311	6.13541	0.0332093	1
gene-LOC105605833|LOC105605833	-2.65154	0.492061	0.033245	1
gene-CXCL16|CXCL16	-0.448085	4.9274	0.0332696	1
gene-RAB3B|RAB3B	-0.565167	3.86614	0.0333767	1
gene-LOC121817987|LOC121817987	-1.34104	0.189943	0.033429	1
gene-LOC105605321|LOC105605321	-2.03498	-0.919837	0.0337005	1
gene-LAMA3|LAMA3	-0.644487	5.16727	0.033794	1
gene-CD40|CD40	-0.624343	2.64857	0.0338722	1
gene-SPP1|SPP1	0.820273	2.21614	0.0340143	1
gene-TLN2|TLN2	-0.429847	4.75622	0.0340798	1
gene-LAYN|LAYN	-0.495002	3.68401	0.0341457	1
gene-LOC121816557|LOC121816557	-0.892279	3.25472	0.0341927	1
gene-LOC101122689|LOC101122689	-0.691512	4.76199	0.0342358	1
gene-IL13RA2|IL13RA2	3.10051	-0.355515	0.0342912	1
gene-AGT|AGT	-1.07175	3.05047	0.0343117	1
gene-CREM|CREM	0.526706	4.55717	0.0344262	1
gene-MX2|MX2	-1.15282	7.18259	0.0344714	1
gene-LOC121820167|LOC121820167	-0.937067	0.99866	0.0346973	1
gene-LOC101120993|LOC101120993	-0.670973	3.30891	0.0348417	1
gene-MATN2|MATN2	-0.554036	3.85664	0.0352916	1
gene-LOC114109333|LOC114109333	-1.13294	1.52551	0.0354647	1
gene-LOC121816516|LOC121816516	1.43515	2.87046	0.0355109	1
gene-OVOL1|OVOL1	-0.740945	4.09699	0.0356027	1
gene-LOC121815985|LOC121815985	1.47971	2.90618	0.0356635	1
gene-LOC114116989|LOC114116989	2.87396	0.080068	0.0357905	1
gene-COLEC12|COLEC12	-0.532139	4.42932	0.0358027	1
gene-MERTK|MERTK	-0.486609	4.14079	0.0358189	1
gene-BMP4|BMP4	-0.418061	4.92276	0.0359148	1
gene-APOB|APOB	1.56255	3.62936	0.0360823	1
gene-LOC101102227|LOC101102227	-1.68327	-0.332506	0.0361407	1
gene-LOC101107541|LOC101107541	2.17478	2.21725	0.036197	1
gene-LOC101115820|LOC101115820	1.04177	0.29876	0.036205	1
gene-AKAP8L|AKAP8L	-0.316388	5.62526	0.0362379	1
gene-SLAMF8|SLAMF8	-0.718343	2.50633	0.0362865	1
gene-XBP1|XBP1	0.366192	9.36713	0.0362895	1
gene-TMEM150C|TMEM150C	-0.507515	3.65932	0.0363724	1
gene-CD5|CD5	-0.72689	4.12764	0.0365358	1
gene-SLC1A4|SLC1A4	0.685943	7.29092	0.0365387	1
gene-FKBP5|FKBP5	0.621792	6.61967	0.0366201	1
gene-DPYS|DPYS	-1.20671	2.32445	0.0366551	1
gene-C9H8orf34|C9H8orf34	-3.96701	-0.807522	0.0367139	1
gene-GRAMD2A|GRAMD2A	-0.735821	2.07183	0.0368987	1
gene-LGI4|LGI4	-0.69579	2.97245	0.0369551	1
gene-LOC121820458|LOC121820458	0.997169	3.12058	0.0372425	1
gene-LAMP3|LAMP3	-0.540555	4.47327	0.0372648	1
gene-LOC101103878|LOC101103878	-1.23432	0.494676	0.0374167	1
gene-LOC101121244|LOC101121244	-0.442648	6.0609	0.0377306	1
gene-ICOSLG|ICOSLG	-0.373637	5.14763	0.0377566	1
gene-LYPD1|LYPD1	-1.00835	2.74597	0.0377795	1
gene-LOC101113965|LOC101113965	-1.41757	5.52019	0.0379241	1
gene-LOC105609642|LOC105609642	1.47558	-0.671317	0.0379246	1
gene-ACAD10|ACAD10	0.456346	5.98189	0.0380432	1
gene-LOC105614340|LOC105614340	-0.591067	4.00559	0.0382009	1
gene-ITIH4|ITIH4	0.813832	5.68513	0.0382666	1
gene-KLHL14|KLHL14	-1.43615	-0.322269	0.0384371	1
gene-POSTN|POSTN	0.574754	7.77014	0.0386143	1
gene-LOC101115509|LOC101115509	-0.469581	4.15459	0.0389957	1
gene-LOC114113967|LOC114113967	0.991289	0.316555	0.0393635	1
gene-LOC101109219|LOC101109219	-0.689927	2.11668	0.0394499	1
gene-PGM5|PGM5	-0.36853	5.67099	0.0394736	1
gene-SPOCK1|SPOCK1	-0.535747	2.59398	0.0395585	1
gene-PTCH2|PTCH2	-0.571793	3.26493	0.0397018	1
gene-SPNS3|SPNS3	-2.8332	-0.821106	0.0397429	1
gene-TNFRSF18|TNFRSF18	0.578191	2.6612	0.0397452	1
gene-GOLT1A|GOLT1A	0.437396	4.61822	0.0397654	1
gene-PROSER2|PROSER2	-0.448111	5.1368	0.0398782	1
gene-ALOX15|ALOX15	1.0158	3.56441	0.0399204	1
gene-HERC6|HERC6	-0.695751	7.25377	0.0399398	1
gene-COL26A1|COL26A1	-0.952099	0.673667	0.0401421	1
gene-PLPP5|PLPP5	0.379171	4.93079	0.0402687	1
gene-NLRC5|NLRC5	-0.416315	7.67707	0.040272	1
gene-CORIN|CORIN	-1.03977	0.205466	0.0403266	1
gene-EMB|EMB	-0.785974	3.66478	0.0407112	1
gene-LOC101115982|LOC101115982	-0.660899	4.23352	0.0412108	1
gene-LOC105606212|LOC105606212	-0.864184	1.25871	0.0412108	1
gene-DTX3L|DTX3L	-0.466846	6.74451	0.0413142	1
gene-LOC121819157|LOC121819157	1.45482	-0.710907	0.041412	1
gene-C1QA|C1QA	-0.510637	6.48118	0.0415925	1
gene-CASQ1|CASQ1	-1.37919	-0.0641478	0.0416542	1
gene-RNF213|RNF213	-0.566799	8.63784	0.0417952	1
gene-LOC114111206|LOC114111206	0.71856	2.29294	0.041937	1
gene-KCNK16|KCNK16	-0.641304	1.73559	0.0419901	1
gene-CHST4|CHST4	-0.721743	6.70324	0.0420099	1
gene-SLCO4C1|SLCO4C1	0.811485	0.723415	0.0420195	1
gene-LOC121818987|LOC121818987	1.38459	0.0340662	0.042066	1
gene-GPR82|GPR82	-0.818948	2.08641	0.0423804	1
gene-STX6|STX6	-0.303942	5.65855	0.0425595	1
gene-LOC105603510|LOC105603510	-1.01817	0.473282	0.0428252	1
gene-LOC105607019|LOC105607019	-0.752921	5.14799	0.0428541	1
gene-ADGRE1|ADGRE1	1.27636	0.650815	0.0428655	1
gene-LOC105605854|LOC105605854	-1.15313	1.02557	0.0428969	1
gene-ARID5B|ARID5B	0.440972	6.78659	0.0429128	1
gene-LUZP6|LUZP6	3.33707	-1.09964	0.0430344	1
gene-LOC101117107|LOC101117107	-0.675816	5.05321	0.0430466	1
gene-CXCL11|CXCL11	-0.994804	2.53302	0.0430568	1
gene-LOC114108595|LOC114108595	0.832549	3.99557	0.043457	1
gene-SH3D19|SH3D19	-0.387614	5.79717	0.0436468	1
gene-CS|CS	0.318059	8.1261	0.0437103	1
gene-LOC105613374|LOC105613374	-0.499433	6.20966	0.043991	1
gene-CEBPD|CEBPD	0.359979	6.18764	0.0440364	1
gene-LOC114117577|LOC114117577	0.756858	0.921995	0.0441259	1
gene-ITGAE|ITGAE	-0.590896	5.16838	0.0441781	1
gene-STRIP2|STRIP2	0.632366	3.97807	0.0442312	1
gene-LOC121817417|LOC121817417	-0.679416	5.23291	0.044313	1
gene-COL7A1|COL7A1	-0.552079	3.14748	0.0443841	1
gene-LOC106990106|LOC106990106	-0.388188	4.52253	0.044442	1
gene-ATP6AP1|ATP6AP1	0.370697	7.73109	0.0444546	1
gene-PML|PML	-0.397492	6.45657	0.0445102	1
gene-LOC105611518|LOC105611518	0.598172	1.84832	0.0447318	1
gene-NTM|NTM	-1.63231	-0.581238	0.0449094	1
gene-LOC121818926|LOC121818926	1.02722	1.49025	0.0450003	1
gene-LOC101115927|LOC101115927	-0.672973	2.69972	0.045064	1
gene-LOC101116972|LOC101116972	-0.724766	1.32165	0.0450643	1
gene-NCALD|NCALD	-0.435252	3.84443	0.0451076	1
gene-LOC101109262|LOC101109262	-0.884531	1.79656	0.0452441	1
gene-MRPS15|MRPS15	0.342199	5.66894	0.045256	1
gene-ZCWPW1|ZCWPW1	2.43491	-0.244071	0.0453504	1
gene-FOXF2|FOXF2	-0.577755	3.33646	0.0456643	1
gene-OVAR-DRB1|OVAR-DRB1	-0.540767	7.175	0.0457136	1
gene-QPCT|QPCT	-1.94014	-1.1489	0.0457296	1
gene-ADGRG3|ADGRG3	2.43477	-1.00611	0.0457572	1
gene-LOC106990700|LOC106990700	0.952527	0.470633	0.0459112	1
gene-APOBR|APOBR	-0.455738	5.59048	0.0459642	1
gene-LOC101119517|LOC101119517	-0.876759	5.73307	0.0459729	1
gene-IFIH1|IFIH1	-0.526233	6.38656	0.0460375	1
gene-SPTSSB|SPTSSB	-0.483627	6.05728	0.046252	1
gene-TPH2|TPH2	1.39663	-0.441452	0.0464499	1
gene-TMCC3|TMCC3	-0.476202	4.07669	0.0465198	1
gene-LAT|LAT	-0.563879	4.93209	0.0465224	1
gene-LOC105606285|LOC105606285	-1.78705	-1.08301	0.046539	1
gene-TMC6|TMC6	0.388043	6.60869	0.0466412	1
gene-CYGB|CYGB	-0.53254	2.71788	0.0468156	1
gene-AOC1|AOC1	0.839293	2.97238	0.0469946	1
gene-NT5C3A|NT5C3A	-0.644542	5.26425	0.0472051	1
gene-GPX2|GPX2	0.62773	7.54036	0.0472059	1
gene-LOC121818504|LOC121818504	-1.63328	-0.593118	0.0472428	1
gene-LOC105611708|LOC105611708	1.70778	-1.02295	0.0473064	1
gene-LOC101103965|LOC101103965	-0.711867	5.89058	0.047457	1
gene-LOC121818599|LOC121818599	0.795647	1.06714	0.0474619	1
gene-GPR35|GPR35	-0.719726	2.26043	0.0475382	1
gene-CAPS|CAPS	0.813763	0.533974	0.0477062	1
gene-LOC114114157|LOC114114157	-1.96571	-0.643453	0.0477482	1
gene-CD2|CD2	-0.577392	5.30742	0.0478345	1
gene-LOC101122983|LOC101122983	-0.373397	5.60104	0.0479363	1
gene-LRRC34|LRRC34	-1.70162	-1.09765	0.0479368	1
gene-LOC101122142|LOC101122142	-0.644183	6.27162	0.0479881	1
gene-TUBB4A|TUBB4A	0.531845	5.21596	0.048114	1
gene-LOC114117557|LOC114117557	1.08174	-0.471245	0.0481381	1
gene-LOC101110277|LOC101110277	-1.53611	4.20213	0.0481753	1
gene-GNG2|GNG2	-0.447628	3.96387	0.0482027	1
gene-MUC6|MUC6	0.917251	10.8298	0.0482101	1
gene-LOC101119773|LOC101119773	-0.924898	5.02939	0.0486977	1
gene-LOC114118887|LOC114118887	1.44779	-0.906592	0.0488006	1
gene-PIK3CD|PIK3CD	-0.451247	5.32858	0.0490459	1
gene-LOC121816892|LOC121816892	0.747831	0.748013	0.0493446	1
gene-SLC23A1|SLC23A1	0.506505	4.26785	0.0493556	1
gene-ALDH1L2|ALDH1L2	0.677578	6.09386	0.0494096	1
gene-CFAP61|CFAP61	2.73188	-1.02401	0.049436	1
gene-LOC101111543|LOC101111543	-0.645163	2.94357	0.0495197	1
gene-LOC101105876|LOC101105876	0.889149	3.14514	0.0496802	1
gene-TNFAIP6|TNFAIP6	-1.52158	-0.041427	0.0497094	1
gene-CXCR6|CXCR6	-0.603219	4.66353	0.049754	1
gene-LOC101111470|LOC101111470	-0.408595	4.89097	0.0499335	1
gene-LIPG|LIPG	-1.53008	2.4876	0.0500387	1
gene-TNFRSF19|TNFRSF19	0.603589	4.70043	0.0501903	1
gene-RRP1B|RRP1B	0.469748	6.0185	0.0502441	1
gene-WARS1|WARS1	-0.686891	8.42858	0.0502669	1
gene-TCP10L|TCP10L	-1.16493	0.356361	0.0503249	1
gene-IRF7|IRF7	-0.661546	5.41455	0.0503421	1
gene-LOC114116738|LOC114116738	1.87437	-0.862845	0.0505192	1
gene-LOC101104700|LOC101104700	-0.53496	5.49001	0.0505287	1
gene-GLI3|GLI3	-0.500268	3.21606	0.0506873	1
gene-ISG15|ISG15	-1.23552	6.45183	0.0508282	1
gene-NEK5|NEK5	0.859114	1.70257	0.0508675	1
gene-LOC114117945|LOC114117945	-0.957786	-0.186717	0.050976	1
gene-TNXB|TNXB	-0.75816	5.59573	0.051018	1
gene-UBA7|UBA7	-0.483978	6.00084	0.0510788	1
gene-LOC121816090|LOC121816090	0.94107	0.272364	0.0511735	1
gene-LOC114111361|LOC114111361	0.696721	1.55531	0.0512039	1
gene-CCR10|CCR10	0.655073	2.76935	0.0512269	1
gene-LOC121817487|LOC121817487	-2.64634	-1.14081	0.0514769	1
gene-CCDC181|CCDC181	0.916713	-0.127274	0.0514945	1
gene-SAXO2|SAXO2	-0.991764	-0.315677	0.0515392	1
gene-LOC101118213|LOC101118213	0.726951	10.978	0.0515801	1
gene-B4GALT6|B4GALT6	-0.778051	1.34792	0.0520301	1
gene-LOC101123029|LOC101123029	-1.38841	-0.012363	0.0520313	1
gene-SFXN5|SFXN5	0.330286	5.05426	0.0520872	1
gene-ITPRIPL1|ITPRIPL1	-0.358879	4.70153	0.052105	1
gene-SLC1A5|SLC1A5	0.389211	7.04195	0.0522281	1
gene-LOC114118884|LOC114118884	-0.57857	7.05023	0.0522973	1
gene-HESX1|HESX1	0.816389	1.34684	0.0524136	1
gene-CSF1R|CSF1R	-0.448472	5.39666	0.0524372	1
gene-LOC114109597|LOC114109597	0.431964	5.7877	0.052554	1
gene-RIPPLY1|RIPPLY1	-3.11958	-0.848227	0.0525546	1
gene-SIK1|SIK1	0.355074	6.71396	0.0525864	1
gene-LOC114118595|LOC114118595	1.24688	-0.965414	0.05271	1
gene-FBXO40|FBXO40	-0.751713	1.19415	0.0528078	1
gene-HOXA4|HOXA4	-0.65353	1.73022	0.0530916	1
gene-STMN2|STMN2	-0.965765	1.46419	0.053404	1
gene-GPI|GPI	0.348325	7.68816	0.0535348	1
gene-CAPN8|CAPN8	-0.417458	9.17824	0.0535904	1
gene-LOC121816682|LOC121816682	0.402337	7.95298	0.0536173	1
gene-LOC105603365|LOC105603365	1.14759	-0.834459	0.0537678	1
gene-FHL5|FHL5	-0.785719	0.420713	0.053828	1
gene-COL6A5|COL6A5	0.881466	5.89838	0.0538456	1
gene-LOC121818289|LOC121818289	-1.23788	-0.603387	0.0539371	1
gene-LOC106990117|LOC106990117	-0.899332	6.70063	0.053968	1
gene-LOC101116099|LOC101116099	-0.629883	4.9611	0.0540055	1
gene-LOC114109557|LOC114109557	2.17899	-0.441388	0.0540177	1
gene-KCNC3|KCNC3	0.493861	3.60088	0.0542401	1
gene-ADD2|ADD2	-0.867979	1.83682	0.0542532	1
gene-LIFR|LIFR	0.406243	6.48068	0.0543075	1
gene-LOC114116436|LOC114116436	-1.13758	-0.300213	0.054344	1
gene-AKR1B1|AKR1B1	-0.499073	3.19628	0.0544427	1
gene-ACP5|ACP5	-0.435099	5.71855	0.0544478	1
gene-ARHGAP33|ARHGAP33	-0.401745	4.03499	0.0546166	1
gene-LOC114118416|LOC114118416	-0.455713	6.84608	0.0546499	1
gene-LOC121816994|LOC121816994	-0.507096	7.26549	0.0547522	1
gene-ZDHHC2|ZDHHC2	-0.501367	3.07181	0.054781	1
gene-LOC101120395|LOC101120395	-1.03548	5.4522	0.0548792	1
gene-FLT4|FLT4	-0.518103	3.04796	0.0548837	1
gene-ATF3|ATF3	-0.640404	4.60865	0.0549849	1
gene-DPYSL2|DPYSL2	-0.330877	5.56742	0.0550115	1
gene-LOC114110105|LOC114110105	-0.617473	2.46998	0.055046	1
gene-VIPR1|VIPR1	0.781676	1.77614	0.0550801	1
gene-FBN3|FBN3	1.13219	2.15032	0.055097	1
gene-DOC2B|DOC2B	0.483966	3.44323	0.0551998	1
gene-BDKRB2|BDKRB2	-0.604388	3.10748	0.0552435	1
gene-LOC101114790|LOC101114790	0.563187	5.18893	0.0552568	1
gene-C24H16orf96|C24H16orf96	-2.00757	-0.94968	0.0552602	1
gene-MCTP2|MCTP2	-1.05705	3.63547	0.0556346	1
gene-LOC101119545|LOC101119545	-0.681641	6.20796	0.0558845	1
gene-PPEF2|PPEF2	-0.611117	2.19322	0.0560242	1
gene-LOC121820680|LOC121820680	-0.843833	0.957432	0.0561926	1
gene-LOC121817949|LOC121817949	-0.976739	1.64486	0.0561999	1
gene-TMEM176B|TMEM176B	-0.298842	6.18515	0.0563458	1
gene-LOC114113867|LOC114113867	0.876802	0.209958	0.0564432	1
gene-DEFB109B|DEFB109B	-1.09808	-0.00129102	0.056489	1
gene-LOC101116575|LOC101116575	1.33559	2.71891	0.0566189	1
gene-CD101|CD101	-0.566488	3.87507	0.0566725	1
gene-LOC101105020|LOC101105020	-1.03694	0.0567597	0.0567399	1
gene-HES4|HES4	-0.808018	2.00295	0.0568451	1
gene-PER3|PER3	0.645327	3.5787	0.0568461	1
gene-GTPBP4|GTPBP4	0.307606	6.36286	0.0569729	1
gene-LOXL2|LOXL2	-0.461953	4.33124	0.0571357	1
gene-ARHGAP9|ARHGAP9	-0.566907	4.3831	0.0571813	1
gene-RGS4|RGS4	-2.74841	-0.926122	0.0574194	1
gene-EFCAB5|EFCAB5	0.941152	0.831287	0.0575299	1
gene-LOC101109907|LOC101109907	-0.585384	6.1872	0.0578565	1
gene-HMCN1|HMCN1	-0.940284	2.16643	0.0579369	1
gene-LOC105601854|LOC105601854	-0.510721	2.96995	0.0580302	1
gene-AMOT|AMOT	0.309558	7.66169	0.058037	1
gene-LOC101108647|LOC101108647	-0.83972	4.45091	0.0580517	1
gene-SGPP2|SGPP2	0.322866	5.38001	0.0580618	1
gene-COL11A2|COL11A2	-1.10186	2.60925	0.0582509	1
gene-GPRASP1|GPRASP1	0.877211	2.84832	0.0582618	1
gene-LOC121817862|LOC121817862	-1.07521	1.35958	0.0582949	1
gene-MMP19|MMP19	-0.615023	3.19272	0.0589314	1
gene-PDE8B|PDE8B	-0.559941	2.72045	0.0589846	1
gene-SCUBE1|SCUBE1	-0.503768	3.15989	0.0591559	1
gene-LOC114116172|LOC114116172	-0.679163	3.11922	0.0592237	1
gene-PRMT2|PRMT2	-0.349659	4.25852	0.0592678	1
gene-APOBEC1|APOBEC1	-0.945742	4.36289	0.0593374	1
gene-OSCP1|OSCP1	0.558417	2.62408	0.0594065	1
gene-SOX5|SOX5	-0.651062	2.0356	0.0594422	1
gene-LOC121819958|LOC121819958	-1.07052	2.04141	0.0595243	1
gene-MGAT5|MGAT5	0.34701	5.92694	0.0600006	1
gene-SNRPD1|SNRPD1	-0.310859	5.47857	0.0600049	1
gene-LOC105601949|LOC105601949	-1.19773	-0.324965	0.0600239	1
gene-ANGPTL1|ANGPTL1	-0.818487	0.912555	0.0600513	1
gene-LOC121818712|LOC121818712	0.723367	1.33536	0.0600713	1
gene-ADRA2A|ADRA2A	0.562733	4.03956	0.0601349	1
gene-LOC114117619|LOC114117619	0.839226	3.49172	0.0603859	1
gene-FABP3|FABP3	-0.493007	5.16566	0.0604645	1
gene-DSCC1|DSCC1	0.382311	4.17438	0.0605051	1
gene-BACH2|BACH2	-0.747073	2.03344	0.0605398	1
gene-C1QTNF3|C1QTNF3	-0.998048	1.71052	0.0606144	1
gene-MEOX1|MEOX1	-0.617452	1.84308	0.0608238	1
gene-LOC121819166|LOC121819166	-1.14666	-0.127319	0.0608482	1
gene-EPPK1|EPPK1	0.340512	5.52017	0.0608532	1
gene-LOC105606280|LOC105606280	1.57044	-0.472738	0.0608557	1
gene-ABCA2|ABCA2	0.398601	6.19283	0.061096	1
gene-CACNA1H|CACNA1H	-0.318704	5.79967	0.0611118	1
gene-LOC114110280|LOC114110280	0.997892	0.0581652	0.061161	1
gene-LOC121817825|LOC121817825	-1.67143	-0.744089	0.0611632	1
gene-GP2|GP2	-2.14884	-1.13808	0.0613612	1
gene-BBOX1|BBOX1	2.05114	-0.917439	0.0615747	1
gene-DNASE1L1|DNASE1L1	0.30111	6.50171	0.0616191	1
gene-LOC121815993|LOC121815993	-0.761614	0.827385	0.0616311	1
gene-CAVIN2|CAVIN2	-0.408238	4.49073	0.0617933	1
gene-GATM|GATM	0.3265	6.6512	0.0619756	1
gene-LOC114114996|LOC114114996	-0.346251	6.96758	0.0620056	1
gene-KCNG3|KCNG3	1.22457	-0.783638	0.0620575	1
gene-LOC101117955|LOC101117955	-0.763409	1.83283	0.0620664	1
gene-GNPDA1|GNPDA1	-0.415114	4.12685	0.062322	1
gene-LOC105614110|LOC105614110	-0.832622	0.151794	0.06237	1
gene-EHF|EHF	0.307546	7.97319	0.0626267	1
gene-LOC121818767|LOC121818767	-0.686934	0.79053	0.0627308	1
gene-LOC101113472|LOC101113472	-0.796344	0.353213	0.0628178	1
gene-INHA|INHA	1.02592	-0.0877971	0.0629425	1
gene-LOC114111441|LOC114111441	-1.39655	-0.502065	0.0629927	1
gene-ENO4|ENO4	0.73647	2.99918	0.063132	1
gene-RAI2|RAI2	-0.718606	2.05478	0.0634067	1
gene-TRIM15|TRIM15	-1.21231	1.5177	0.063681	1
gene-TMC8|TMC8	0.437101	5.26992	0.0636836	1
gene-LMO7|LMO7	-0.386202	7.22195	0.063997	1
gene-GCNT4|GCNT4	0.353784	6.75471	0.0642089	1
gene-FAM189A1|FAM189A1	-1.40442	-0.934692	0.0646085	1
gene-CA4|CA4	0.620272	3.4761	0.064629	1
gene-LOC443326|LOC443326	0.633102	3.07834	0.0646535	1
gene-ANKRD1|ANKRD1	1.09186	5.08022	0.0647599	1
gene-BTNL9|BTNL9	0.833856	2.98689	0.0650408	1
gene-MMP13|MMP13	-1.25012	1.19965	0.0653664	1
gene-DNAJB1|DNAJB1	-0.439029	6.39617	0.0654728	1
gene-LOC121818948|LOC121818948	1.96091	-1.1288	0.065628	1
gene-HMGCS2|HMGCS2	-0.920408	7.06664	0.0656581	1
gene-SERPIND1|SERPIND1	-1.27434	-0.238528	0.0656697	1
gene-DRAXIN|DRAXIN	0.619378	1.41397	0.0657276	1
gene-ZFPM2|ZFPM2	0.57029	2.59233	0.0658038	1
gene-PDHX|PDHX	0.299505	5.14343	0.0658117	1
gene-PKLR|PKLR	-1.07794	2.65602	0.066059	1
gene-LOC101119218|LOC101119218	-0.751749	2.65253	0.0660622	1
gene-LOC101117181|LOC101117181	0.842004	1.8136	0.0660762	1
gene-PRG4|PRG4	1.15155	2.88307	0.0660996	1
gene-GPR160|GPR160	-0.376465	5.35159	0.0661272	1
gene-CD28|CD28	0.807541	1.14724	0.0661287	1
gene-LOC101103752|LOC101103752	-1.66658	2.02363	0.0661654	1
gene-ZBED2|ZBED2	1.49496	1.44904	0.0663113	1
gene-ARHGAP17|ARHGAP17	-0.272359	6.37739	0.066318	1
gene-ARRDC4|ARRDC4	0.33901	5.44682	0.0664373	1
gene-C1QC|C1QC	-0.437493	6.54674	0.0664439	1
gene-LOC101118856|LOC101118856	-1.35993	-0.68409	0.0668193	1
gene-SP110|SP110	-0.32401	5.18208	0.0668304	1
gene-GFRA2|GFRA2	-0.586579	1.8216	0.0668818	1
gene-SIPA1|SIPA1	-0.342101	5.52827	0.066884	1
gene-PPP1R16B|PPP1R16B	-0.418822	5.39603	0.0670775	1
gene-ETV5|ETV5	-0.476832	4.48962	0.0672241	1
gene-SLC7A1|SLC7A1	0.336747	6.25025	0.0672445	1
gene-CRHR1|CRHR1	-1.95327	-1.12932	0.0675559	1
gene-MRGPRG|MRGPRG	1.66926	1.2817	0.0676118	1
gene-CMPK2|CMPK2	-0.72141	5.90842	0.0676896	1
gene-WDFY2|WDFY2	0.300869	4.89173	0.067693	1
gene-SGSM1|SGSM1	-0.309732	5.01894	0.0677333	1
gene-LOC121820778|LOC121820778	-0.835512	2.10931	0.0677761	1
gene-LOC101116867|LOC101116867	-0.614897	6.39406	0.0677991	1
gene-FCGR3A|FCGR3A	-0.434914	5.21518	0.0679882	1
gene-SOX21|SOX21	-0.455073	5.51837	0.068067	1
gene-ITPK1|ITPK1	-0.315445	5.5246	0.0682629	1
gene-LOC105613002|LOC105613002	-0.687916	4.03794	0.0682708	1
gene-LOC101122940|LOC101122940	-0.452947	7.90127	0.0683201	1
gene-HOXC4|HOXC4	-0.74709	0.994953	0.0683943	1
gene-LOC101104705|LOC101104705	-0.855196	1.05102	0.068421	1
gene-MYBPH|MYBPH	0.781993	1.35274	0.0684626	1
gene-AKAP12|AKAP12	-0.384225	5.1866	0.068578	1
gene-DHX58|DHX58	-0.372503	5.33782	0.0686881	1
gene-DOCK10|DOCK10	-0.466991	5.138	0.0688317	1
gene-LOC106992013|LOC106992013	-0.977779	-0.388468	0.0688694	1
gene-LOC105611014|LOC105611014	-1.92308	-0.761877	0.068908	1
gene-SOD3|SOD3	-0.416303	4.12263	0.0689127	1
gene-PTPN22|PTPN22	-0.56381	3.80499	0.0689495	1
gene-IL1RN|IL1RN	0.408709	4.92759	0.0690209	1
gene-LCA5|LCA5	-0.653019	1.26411	0.0691999	1
gene-ISG20|ISG20	-0.91185	3.14111	0.0692669	1
gene-LOC105605201|LOC105605201	0.455827	3.87915	0.069395	1
gene-C1QL2|C1QL2	-1.81	-0.972513	0.0695129	1
gene-LOC121819934|LOC121819934	1.85239	-1.03387	0.0695216	1
gene-LCK|LCK	-0.463699	5.01291	0.0695455	1
gene-LOC114109097|LOC114109097	1.56532	0.844895	0.069547	1
gene-NFATC4|NFATC4	-0.486112	3.3	0.069561	1
gene-LOC114113892|LOC114113892	-0.9442	-0.232394	0.0696273	1
gene-LOC121816724|LOC121816724	1.21568	4.14041	0.0697389	1
gene-FN3K|FN3K	-0.670189	0.973232	0.0697666	1
gene-LOC101111190|LOC101111190	1.23102	4.16552	0.0698583	1
gene-LOC101105132|LOC101105132	-0.435826	5.00317	0.0699408	1
gene-LOC101106844|LOC101106844	1.04862	0.690188	0.0700466	1
gene-L3MBTL1|L3MBTL1	0.450198	3.48044	0.0700879	1
gene-CEBPE|CEBPE	1.82709	-1.08003	0.0700884	1
gene-MEGF6|MEGF6	-0.455178	4.69925	0.0702526	1
gene-LOC101119393|LOC101119393	-0.688805	6.47721	0.0702839	1
gene-LOC114117505|LOC114117505	1.68998	-0.522207	0.0703056	1
gene-LOC121819518|LOC121819518	1.43665	-0.0739273	0.0703865	1
gene-ITIH5|ITIH5	-0.482186	4.49715	0.0704598	1
gene-CHRM5|CHRM5	-1.93425	-1.05789	0.0704964	1
gene-ZCCHC18|ZCCHC18	0.793493	2.14526	0.0705186	1
gene-DAPK2|DAPK2	-0.507378	3.74323	0.0705826	1
gene-JAKMIP3|JAKMIP3	-0.645655	1.09708	0.070805	1
gene-ADAMTSL3|ADAMTSL3	-0.375016	4.72335	0.0708348	1
gene-IRF8|IRF8	-0.383432	5.20351	0.0710152	1
gene-ARHGEF26|ARHGEF26	0.413826	5.13715	0.0711895	1
gene-LOC105604792|LOC105604792	1.45127	-0.0201357	0.0713926	1
gene-CALY|CALY	-1.77763	-0.990879	0.0714338	1
gene-IFNLR1|IFNLR1	-0.414417	4.00959	0.0714568	1
gene-BPIFB1|BPIFB1	-1.13515	6.33411	0.0717276	1
gene-IL5RA|IL5RA	1.36811	2.21387	0.0717455	1
gene-SLC16A10|SLC16A10	0.48689	6.84194	0.072161	1
gene-LRRC55|LRRC55	-0.604658	3.03437	0.0721903	1
gene-LOC114115689|LOC114115689	1.13617	1.2105	0.0723721	1
gene-SCN5A|SCN5A	0.704893	5.97547	0.0723898	1
gene-SLC31A2|SLC31A2	0.584836	3.874	0.0723948	1
gene-PROM1|PROM1	0.588485	7.35028	0.0724243	1
gene-FBN2|FBN2	0.333929	5.51411	0.0729172	1
gene-NLGN3|NLGN3	-0.575837	1.44995	0.0729672	1
gene-LOC105603269|LOC105603269	-1.12625	-0.675159	0.0729896	1
gene-GLI1|GLI1	-0.437889	3.55738	0.0729972	1
gene-LOC101102967|LOC101102967	-1.06859	0.564086	0.0730891	1
gene-STAT2|STAT2	-0.307122	7.32991	0.0731388	1
gene-LOC101120997|LOC101120997	0.58728	2.33208	0.0731482	1
gene-RTN1|RTN1	-0.56108	1.74399	0.0731509	1
gene-UGT1A3|UGT1A3	1.17015	1.71179	0.0732199	1
gene-LOC121820538|LOC121820538	-0.810601	0.0789199	0.0732847	1
gene-CA8|CA8	-0.730997	6.17846	0.0734924	1
gene-SYNGAP1|SYNGAP1	-0.331961	4.42412	0.0736015	1
gene-LOC114113675|LOC114113675	-0.934335	1.55891	0.0736227	1
gene-CDHR5|CDHR5	-0.447542	4.2966	0.0736513	1
gene-CEACAM16|CEACAM16	-0.470558	2.83907	0.0737035	1
gene-CD8B|CD8B	-0.665847	3.7863	0.0737755	1
gene-SLC25A42|SLC25A42	0.450429	4.36759	0.0738188	1
gene-PURG|PURG	0.720146	1.30481	0.0738262	1
gene-MYOC|MYOC	-0.690153	2.56575	0.0739035	1
gene-FCAMR|FCAMR	-1.63378	0.868971	0.0740363	1
gene-ZNF696|ZNF696	-0.54872	1.836	0.0742083	1
gene-NID2|NID2	0.371716	4.76646	0.0745581	1
gene-LOC121818287|LOC121818287	-1.62334	-0.676291	0.0746418	1
gene-HECA|HECA	-0.295452	6.24484	0.074705	1
gene-JADE1|JADE1	0.290104	6.30005	0.0748149	1
gene-LOC114109358|LOC114109358	0.68406	2.51402	0.0749727	1
gene-SLITRK2|SLITRK2	-0.728899	3.00231	0.0750241	1
gene-LOC121817091|LOC121817091	-1.87626	1.54112	0.0750621	1
gene-SOX9|SOX9	0.269822	5.97947	0.0750787	1
gene-CASP6|CASP6	0.302382	6.10737	0.0752334	1
gene-LOC121816908|LOC121816908	1.66832	-1.05013	0.0752465	1
gene-MTUS1|MTUS1	0.28703	7.77317	0.0756033	1
gene-NAGK|NAGK	-0.309508	4.82305	0.0756409	1
gene-FOXD1|FOXD1	-0.868088	0.731984	0.0756908	1
gene-SAMSN1|SAMSN1	0.5245	3.55814	0.075735	1
gene-LOC101110848|LOC101110848	-0.570789	5.8322	0.0758735	1
gene-MST1R|MST1R	-0.286443	6.22837	0.0759425	1
gene-CHGB|CHGB	-1.0347	1.867	0.0760795	1
gene-LIMK1|LIMK1	-0.453773	3.99532	0.0761076	1
gene-EHBP1L1|EHBP1L1	-0.402297	7.69501	0.0762489	1
gene-RIPK3|RIPK3	-0.343279	5.433	0.0763878	1
gene-DCN|DCN	-0.394527	7.4111	0.0765368	1
gene-GPR37|GPR37	-0.63793	1.23747	0.0767268	1
gene-NEK10|NEK10	0.621669	1.23112	0.0767496	1
gene-LOC114109030|LOC114109030	-0.549084	4.17303	0.0770315	1
gene-LOC654331|LOC654331	1.00059	0.509689	0.0770788	1
gene-LOC114110792|LOC114110792	1.31481	2.7421	0.0770901	1
gene-ADAM28|ADAM28	0.53317	8.53582	0.0771655	1
gene-RGL3|RGL3	0.422637	5.04671	0.0771722	1
gene-KIF7|KIF7	-0.421793	4.1086	0.0771742	1
gene-CHRNA5|CHRNA5	1.11935	0.638632	0.0772576	1
gene-RHPN2|RHPN2	-0.328875	5.90779	0.0775299	1
gene-SLC27A1|SLC27A1	0.490726	5.48412	0.0775928	1
gene-SLC6A19|SLC6A19	-1.15434	0.184024	0.0778319	1
gene-MX1|MX1	-0.858029	7.80201	0.0779994	1
gene-NPL|NPL	0.421698	3.53282	0.0780032	1
gene-HOXA5|HOXA5	-0.581735	2.27541	0.0780086	1
gene-LOC121820756|LOC121820756	-0.524341	2.73964	0.0780232	1
gene-CNTNAP1|CNTNAP1	0.474164	4.36418	0.0780815	1
gene-PPARGC1B|PPARGC1B	0.392811	6.91926	0.0782892	1
gene-PROCR|PROCR	0.479424	4.07974	0.0783835	1
gene-LOC121819211|LOC121819211	-0.687311	1.04194	0.0784229	1
gene-SLC16A6|SLC16A6	0.495804	2.76078	0.0784842	1
gene-RERG|RERG	-0.656707	1.30194	0.0785473	1
gene-ARHGAP31|ARHGAP31	0.330637	5.12823	0.0786207	1
gene-LOC114113988|LOC114113988	-1.00261	-0.83456	0.0786307	1
gene-SCG2|SCG2	-0.56591	3.31246	0.0786602	1
gene-C2H9orf152|C2H9orf152	-0.346603	4.73483	0.0787123	1
gene-KCNC1|KCNC1	-1.39704	-1.00582	0.078822	1
gene-AP3M2|AP3M2	0.464214	3.16878	0.0788269	1
gene-USH1C|USH1C	-0.650591	4.2922	0.0788287	1
gene-DNAH12|DNAH12	1.08282	-0.811879	0.0789873	1
gene-LOC101110090|LOC101110090	-0.376621	6.38616	0.079017	1
gene-LOC101112761|LOC101112761	-0.545181	2.65737	0.0791045	1
gene-ESAM|ESAM	0.332848	5.14613	0.0793065	1
gene-NLRC3|NLRC3	-0.438074	4.99615	0.0797339	1
gene-LOC105616883|LOC105616883	-1.06572	0.147851	0.0799065	1
gene-LOC114118741|LOC114118741	-1.00347	1.42346	0.0799192	1
gene-MMP3|MMP3	1.75965	2.19138	0.0802236	1
gene-LOC114110794|LOC114110794	1.86274	4.6582	0.0803287	1
gene-ATRNL1|ATRNL1	-0.491383	3.30545	0.0804683	1
gene-SRPX2|SRPX2	-0.577534	2.81163	0.0806357	1
gene-CCL24|CCL24	1.25783	0.568729	0.080682	1
gene-BATF2|BATF2	-0.75064	3.74472	0.0807775	1
gene-LOC121819608|LOC121819608	0.656506	1.26924	0.0808568	1
gene-FOLR2|FOLR2	-0.483842	3.22936	0.080899	1
gene-LOC114115224|LOC114115224	-0.346406	6.10179	0.080958	1
gene-LOC105609731|LOC105609731	-1.0087	1.03952	0.0810502	1
gene-LOC101118825|LOC101118825	-0.416049	3.96181	0.0810827	1
gene-NCAM1|NCAM1	-0.581611	2.9236	0.0813957	1
gene-LOC114115251|LOC114115251	0.794705	0.225495	0.0815918	1
gene-CAPNS2|CAPNS2	1.31435	0.0946426	0.0816028	1
gene-FER1L5|FER1L5	1.52568	-0.311324	0.0816334	1
gene-PRRT4|PRRT4	-1.12887	-0.325948	0.081771	1
gene-SST|SST	-0.562443	6.49212	0.081819	1
gene-WDR83OS|WDR83OS	-0.258743	5.54177	0.0819065	1
gene-IL1R2|IL1R2	-0.450593	4.59693	0.0819211	1
gene-TRANK1|TRANK1	-0.323777	7.92581	0.0821045	1
gene-ENPP2|ENPP2	-0.372209	6.05953	0.0822672	1
gene-HAUS3|HAUS3	-0.411177	3.95251	0.0822743	1
gene-SMOC1|SMOC1	0.444515	4.22724	0.0822943	1
gene-KDM6A|KDM6A	-0.315066	6.25827	0.0825479	1
gene-WNT4|WNT4	-0.460397	2.94242	0.0827015	1
gene-ZMYND12|ZMYND12	1.58594	-0.842566	0.0828552	1
gene-LOC121820175|LOC121820175	0.905802	0.505266	0.0831308	1
gene-ALDOC|ALDOC	0.439756	5.71585	0.0833443	1
gene-LOC105604300|LOC105604300	0.695089	3.4162	0.0834792	1
gene-LOC114113856|LOC114113856	0.71623	0.833163	0.0834893	1
gene-ACADSB|ACADSB	0.392595	6.76879	0.083492	1
gene-TMPRSS2|TMPRSS2	0.317348	9.20269	0.0835672	1
gene-LOC101104050|LOC101104050	0.324644	4.82564	0.0835711	1
gene-ABCB1|ABCB1	-0.500981	4.44726	0.0838073	1
gene-LOC101109747|LOC101109747	-0.520842	8.59112	0.0838077	1
gene-LOC114114485|LOC114114485	-0.532956	8.01433	0.083812	1
gene-PIGQ|PIGQ	0.300297	6.81387	0.0839615	1
gene-TENM3|TENM3	0.479123	3.3265	0.0841399	1
gene-TMEM106A|TMEM106A	-0.517331	4.37611	0.0841696	1
gene-LOC114118375|LOC114118375	-0.52857	3.09251	0.0842494	1
gene-CPQ|CPQ	-0.496903	2.32678	0.084323	1
gene-TKT|TKT	0.335764	7.98106	0.0844671	1
gene-SPATS2L|SPATS2L	-0.343392	7.48124	0.084533	1
gene-DIRAS2|DIRAS2	0.702756	1.20118	0.0846145	1
gene-FOXF1|FOXF1	-0.351279	4.54827	0.0847041	1
gene-KCNE1|KCNE1	0.613415	3.73131	0.0847058	1
gene-LOC101123625|LOC101123625	-0.609287	2.63822	0.0848546	1
gene-EDNRA|EDNRA	-0.37911	3.81518	0.0849912	1
gene-SIGLEC5|SIGLEC5	0.696941	1.79183	0.0853152	1
gene-HPRT1|HPRT1	0.372019	5.8378	0.0853442	1
gene-OAZ3|OAZ3	-1.22125	-0.964538	0.0853678	1
gene-CXCL9|CXCL9	-0.957289	4.0784	0.0853846	1
gene-CALHM2|CALHM2	-0.487224	3.40627	0.0854726	1
gene-ITGB7|ITGB7	-0.398806	5.54769	0.0854861	1
gene-NFE2L3|NFE2L3	-0.395991	6.51491	0.0855164	1
gene-LOC121816991|LOC121816991	-0.514225	7.56927	0.0855197	1
gene-TESC|TESC	0.326271	5.95525	0.0855686	1
gene-TRAM2|TRAM2	0.307867	7.34154	0.0856133	1
gene-DNAJA4|DNAJA4	-0.460543	4.99202	0.0858217	1
gene-B3GALNT2|B3GALNT2	0.268548	5.77124	0.0858341	1
gene-PHOSPHO1|PHOSPHO1	0.820407	0.796189	0.0859938	1
gene-NDRG2|NDRG2	0.312063	7.52074	0.0860357	1
gene-LOC114109054|LOC114109054	-0.84375	4.10388	0.0860728	1
gene-CREB3L3|CREB3L3	0.79534	3.88033	0.0861096	1
gene-P2RX1|P2RX1	0.714716	2.40618	0.0861717	1
gene-DGKG|DGKG	-1.31708	-0.151725	0.0861887	1
gene-LOC105614852|LOC105614852	-0.48951	4.7775	0.0862587	1
gene-LOC105611558|LOC105611558	-1.05512	-0.802829	0.0869317	1
gene-LIPA|LIPA	-0.345643	6.42357	0.0870265	1
gene-SCG3|SCG3	0.359897	4.10124	0.0871024	1
gene-JUN|JUN	-0.351771	7.65703	0.087108	1
gene-LOC101120084|LOC101120084	-0.508982	2.1125	0.0871463	1
gene-LOC114117957|LOC114117957	-0.495562	3.50268	0.0872176	1
gene-RNASEH2B|RNASEH2B	0.312155	5.20353	0.0875274	1
gene-TRPM2|TRPM2	-0.450894	7.06313	0.087584	1
gene-HAS3|HAS3	0.590729	1.74656	0.088022	1
gene-LOC101108819|LOC101108819	-0.785909	1.22459	0.0885147	1
gene-CPSF6|CPSF6	-0.409439	8.20798	0.0886375	1
gene-DOC2A|DOC2A	2.56337	-0.484632	0.0887743	1
gene-LOC121820620|LOC121820620	2.4467	0.518011	0.0887765	1
gene-ZDHHC22|ZDHHC22	-1.83188	-0.851625	0.0888544	1
gene-LOC121819417|LOC121819417	-1.08547	1.31849	0.0889973	1
gene-CPA3|CPA3	2.22782	-0.385457	0.08901	1
gene-LOC101122753|LOC101122753	-2.94935	0.848165	0.0891703	1
gene-TRIM10|TRIM10	-0.720689	1.11115	0.0891899	1
gene-MARCKSL1|MARCKSL1	-0.305712	7.19837	0.0892533	1
gene-CRLF2|CRLF2	0.748947	0.633404	0.0892851	1
gene-KCNK15|KCNK15	-0.537397	2.9672	0.0893053	1
gene-PAK6|PAK6	-0.410767	3.39749	0.0896919	1
gene-LOC121820546|LOC121820546	0.725905	0.0238812	0.0898276	1
gene-ENPP5|ENPP5	0.347052	5.70242	0.0899098	1
gene-LPAR1|LPAR1	-0.405279	4.09749	0.0899642	1
gene-FBXL3|FBXL3	-0.280016	5.43799	0.0900159	1
gene-LOC101103658|LOC101103658	0.789544	0.877623	0.090125	1
gene-DDC|DDC	0.269894	5.99542	0.090305	1
gene-FNDC3B|FNDC3B	0.305903	7.50113	0.0903825	1
gene-CD4|CD4	0.479925	4.35216	0.0904296	1
gene-PPM1L|PPM1L	0.452813	6.42005	0.0905062	1
gene-CSRP1|CSRP1	-0.311671	6.96835	0.0907302	1
gene-SCEL|SCEL	-1.28149	0.805269	0.0907517	1
gene-NPPC|NPPC	-0.742253	1.5964	0.0907814	1
gene-LOC121816970|LOC121816970	1.07066	-0.530411	0.0908456	1
gene-ASB8|ASB8	0.288599	5.05596	0.090898	1
gene-LOC101106970|LOC101106970	0.968264	6.63768	0.0909114	1
gene-SLC27A6|SLC27A6	-0.63182	1.39105	0.0909291	1
gene-DEDD2|DEDD2	-0.331024	4.51149	0.0909854	1
gene-LOC121820675|LOC121820675	0.772707	0.311631	0.0910575	1
gene-LOC101122496|LOC101122496	-0.559204	1.31351	0.0917886	1
gene-LOC114118420|LOC114118420	-0.471082	4.1283	0.0919317	1
gene-SLC37A4|SLC37A4	0.312791	4.46286	0.0919459	1
gene-LOC114110984|LOC114110984	1.50322	-1.10211	0.0919791	1
gene-SUSD3|SUSD3	-0.429028	4.07941	0.0920574	1
gene-STK32A|STK32A	-0.657376	0.955211	0.0922314	1
gene-FRMD4B|FRMD4B	-0.277025	5.60615	0.0922854	1
gene-CD3E|CD3E	-0.478893	6.16668	0.0923504	1
gene-LOC121818742|LOC121818742	-2.27732	-1.04699	0.0925749	1
gene-PABPC4|PABPC4	0.310969	7.37587	0.0927097	1
gene-LOC114116649|LOC114116649	0.7027	1.90446	0.0927593	1
gene-LOC101111456|LOC101111456	0.63006	0.878684	0.0927908	1
gene-MFHAS1|MFHAS1	-0.278028	5.70924	0.0928288	1
gene-CYS1|CYS1	-0.38901	3.74329	0.0928609	1
gene-LOC114118740|LOC114118740	0.503754	2.67143	0.0928662	1
gene-LOC101116622|LOC101116622	-0.366347	6.06658	0.0928976	1
gene-C1QB|C1QB	-0.434188	6.64416	0.0930279	1
gene-KCNT2|KCNT2	-1.00548	-0.410694	0.0930346	1
gene-LOC114109080|LOC114109080	-0.397702	3.62794	0.0931219	1
gene-TUB|TUB	-0.457825	2.77435	0.0932427	1
gene-DCK|DCK	-0.424968	5.4492	0.0932539	1
gene-CRYBG2|CRYBG2	-0.399365	4.52762	0.0933678	1
gene-TWIST1|TWIST1	1.11043	-0.826623	0.0933827	1
gene-ADAMTS19|ADAMTS19	0.633383	2.83914	0.0934119	1
gene-GPC3|GPC3	-0.566326	2.15366	0.093427	1
gene-CLIP2|CLIP2	-0.361713	3.86832	0.0938049	1
gene-FRMD1|FRMD1	-1.13481	0.609503	0.0938121	1
gene-HTD2|HTD2	1.09681	2.1264	0.0938843	1
gene-BNC1|BNC1	-3.17941	-0.912683	0.0941036	1
gene-SMCO3|SMCO3	-1.56411	-1.10811	0.0941815	1
gene-LOC114109630|LOC114109630	-0.533929	8.03521	0.0942335	1
gene-LOC105605755|LOC105605755	1.34583	2.61519	0.0944831	1
gene-LOC101107504|LOC101107504	-0.447274	4.8612	0.0945095	1
gene-BCL2L11|BCL2L11	0.336254	4.67526	0.0945246	1
gene-PALB2|PALB2	-0.292734	5.08783	0.0947648	1
gene-LBH|LBH	-0.418161	6.77449	0.0947687	1
gene-LOC114112881|LOC114112881	0.688099	0.566695	0.0949121	1
gene-C5AR2|C5AR2	0.670638	2.31643	0.0949257	1
gene-SPATA2L|SPATA2L	0.467746	2.308	0.0950871	1
gene-LOC101104028|LOC101104028	-0.595047	1.93212	0.0951335	1
gene-PLEKHG5|PLEKHG5	-0.433081	3.00459	0.095158	1
gene-PLEK2|PLEK2	-0.557798	4.9241	0.0953976	1
gene-NAA35|NAA35	0.243772	5.93265	0.0954086	1
gene-SIDT2|SIDT2	0.370019	6.86674	0.0954632	1
gene-LOC101121414|LOC101121414	-0.351332	5.22237	0.0956203	1
gene-TRIM36|TRIM36	0.528769	3.6405	0.0956438	1
gene-LOC101111847|LOC101111847	-0.536712	1.73451	0.0956456	1
gene-FGGY|FGGY	0.470047	2.86043	0.0958575	1
gene-ABHD16B|ABHD16B	0.613252	1.5912	0.0958958	1
gene-GIMAP6|GIMAP6	-0.393608	5.84277	0.0960041	1
gene-CD247|CD247	-0.416162	3.87634	0.0961496	1
gene-ZEB2|ZEB2	-0.316483	5.2444	0.0961577	1
gene-LOC101114535|LOC101114535	-0.819923	0.718064	0.0964596	1
gene-SEMA3D|SEMA3D	-0.612414	2.07408	0.0966251	1
gene-ADAM8|ADAM8	0.528929	2.6106	0.0966869	1
gene-GGT5|GGT5	0.385032	5.54915	0.0967458	1
gene-LOC121818047|LOC121818047	-1.39913	0.791632	0.0967503	1
gene-FAXC|FAXC	0.311452	5.01844	0.0967598	1
gene-LOC121818600|LOC121818600	1.06346	-0.747619	0.0967858	1
gene-TPPP2|TPPP2	0.430178	2.76751	0.0968411	1
gene-PDE10A|PDE10A	0.463051	3.86264	0.0969655	1
gene-ANKMY2|ANKMY2	0.259984	5.96599	0.0969718	1
gene-SLC15A3|SLC15A3	-0.429281	3.31669	0.097215	1
gene-IFT140|IFT140	0.336992	3.91037	0.0974195	1
gene-APOLD1|APOLD1	0.544032	3.19014	0.0974892	1
gene-TAGLN|TAGLN	-0.413194	7.15678	0.0975465	1
gene-TMEM211|TMEM211	0.924487	0.746727	0.0977005	1
gene-RASGEF1B|RASGEF1B	-0.296099	6.03316	0.0977152	1
gene-LOC121817830|LOC121817830	0.488799	2.31	0.0977969	1
gene-ELL2|ELL2	0.341414	7.11101	0.0978745	1
gene-LOC121817705|LOC121817705	-0.885653	0.356974	0.0978787	1
gene-SESN3|SESN3	-0.303718	6.0647	0.0981266	1
gene-LOC105603808|LOC105603808	0.66793	2.36326	0.0982351	1
gene-SLC3A2|SLC3A2	0.258566	5.9467	0.0984261	1
gene-LOC105605968|LOC105605968	-0.51771	3.20309	0.0985139	1
gene-LOC121817238|LOC121817238	-0.743867	0.825404	0.0987944	1
gene-LOC114116588|LOC114116588	0.681689	1.27345	0.0989267	1
gene-LOC101111628|LOC101111628	-0.798575	2.60191	0.0990482	1
gene-ANO1|ANO1	-0.451872	5.38369	0.0991463	1
gene-RAB8B|RAB8B	-0.306745	5.70405	0.0991522	1
gene-FBXO39|FBXO39	-1.19292	-0.0495266	0.0992189	1
gene-DNAH11|DNAH11	0.556489	2.09511	0.099253	1
gene-TMEM267|TMEM267	0.310166	4.38519	0.0994427	1
gene-ABCC5|ABCC5	0.27528	7.27223	0.099458	1
gene-KIF24|KIF24	0.368839	4.67862	0.099497	1
gene-LOC114108809|LOC114108809	-0.343317	5.78117	0.0995677	1
gene-TPM2|TPM2	-0.327098	6.13271	0.0997183	1
gene-CLSTN2|CLSTN2	-0.774885	2.06359	0.0997189	1
gene-IQCG|IQCG	0.492362	2.20202	0.0997674	1
gene-SLC7A5|SLC7A5	0.355709	5.87777	0.0998305	1
gene-SEPTIN1|SEPTIN1	-0.428842	4.36791	0.0999165	1
gene-CDH20|CDH20	-0.678543	1.68437	0.099988	1
gene-LOC114110434|LOC114110434	-1.10183	-0.180067	0.100258	1
gene-LOC101113328|LOC101113328	1.38476	-0.542982	0.100364	1
gene-LOC114117645|LOC114117645	1.01438	-1.01801	0.100462	1
gene-MAMDC2|MAMDC2	-0.471263	2.231	0.100501	1
gene-LOC114113989|LOC114113989	-1.30489	0.991249	0.100746	1
gene-LOC121816481|LOC121816481	-0.530139	1.37652	0.100756	1
gene-SLC9A2|SLC9A2	0.305463	8.02309	0.100776	1
gene-HHLA2|HHLA2	0.919161	4.00153	0.100794	1
gene-LOC114111821|LOC114111821	0.948854	-0.656965	0.100925	1
gene-SRM|SRM	0.301139	5.34685	0.101009	1
gene-LOC101119068|LOC101119068	0.753443	-0.27507	0.101114	1
gene-ADGRG5|ADGRG5	-0.507278	4.27422	0.101494	1
gene-PCP4|PCP4	-1.94165	-1.06023	0.101606	1
gene-TCF3|TCF3	-0.296234	4.87675	0.10161	1
gene-SCN11A|SCN11A	1.00253	0.221944	0.101679	1
gene-LOC114110520|LOC114110520	0.966145	-0.734664	0.101679	1
gene-CBLN2|CBLN2	-0.7234	0.941245	0.101756	1
gene-GGT6|GGT6	-0.524195	2.29329	0.101777	1
gene-BSPRY|BSPRY	0.281067	5.32074	0.101942	1
gene-LOC121817718|LOC121817718	2.59507	0.601457	0.101958	1
gene-LOC114116957|LOC114116957	0.927011	1.42551	0.101978	1
gene-STOX2|STOX2	0.307286	5.35011	0.101982	1
gene-CDH17|CDH17	-0.561891	7.35331	0.102059	1
gene-WDR7|WDR7	0.259019	5.30535	0.102212	1
gene-CARTPT|CARTPT	0.992346	1.77607	0.102221	1
gene-NCR3|NCR3	-0.578626	2.23132	0.10223	1
gene-GTL2|GTL2	-0.429319	7.17551	0.102278	1
gene-LOC101115753|LOC101115753	-0.966817	-0.759425	0.102477	1
gene-LOC121816696|LOC121816696	-0.503859	2.10738	0.102558	1
gene-EZR|EZR	-0.290374	9.12217	0.10259	1
gene-PLEKHG1|PLEKHG1	-0.504317	3.04709	0.102753	1
gene-LOC101102490|LOC101102490	0.615079	3.38592	0.103083	1
gene-LOC114110572|LOC114110572	-1.54615	-0.634499	0.103119	1
gene-RERGL|RERGL	-0.64584	1.33899	0.103358	1
gene-LOC121816542|LOC121816542	1.41094	-0.749786	0.103364	1
gene-EIF2AK2|EIF2AK2	-0.476799	6.06347	0.103365	1
gene-SEMA4F|SEMA4F	0.420617	3.30398	0.103411	1
gene-LOC121820433|LOC121820433	0.465963	5.57696	0.103494	1
gene-LOC121816458|LOC121816458	0.632475	0.605799	0.104104	1
gene-LOC121816790|LOC121816790	0.846631	0.186626	0.104131	1
gene-LOC101123627|LOC101123627	1.38135	0.598154	0.104136	1
gene-PSCA|PSCA	-0.409465	5.26885	0.104211	1
gene-MTUS2|MTUS2	-0.851249	-0.267479	0.104244	1
gene-LOC101109425|LOC101109425	-0.466393	5.30828	0.104263	1
gene-ABI3|ABI3	-0.484373	3.70752	0.104277	1
gene-LOC114110969|LOC114110969	-0.67296	1.06369	0.104292	1
gene-LOC101108190|LOC101108190	-0.347632	4.91052	0.104353	1
gene-PADI4|PADI4	1.69044	-0.419132	0.104404	1
gene-LOC121818481|LOC121818481	0.313001	5.24714	0.104471	1
gene-FAR2|FAR2	0.699339	0.952305	0.104546	1
gene-RNF43|RNF43	0.236283	5.68336	0.104732	1
gene-MGST2|MGST2	-0.42815	4.4718	0.104876	1
gene-SDC3|SDC3	-0.294483	5.5876	0.104895	1
gene-LOC101102078|LOC101102078	-0.340915	5.38611	0.10497	1
gene-CD86|CD86	-0.408245	4.01097	0.105256	1
gene-LOC105603000|LOC105603000	0.32388	4.96788	0.105472	1
gene-ADAR|ADAR	-0.30383	7.45109	0.105624	1
gene-LOC106990702|LOC106990702	-0.886533	-0.488538	0.105659	1
gene-LOC105606919|LOC105606919	-0.681796	2.14236	0.10568	1
gene-MCCC2|MCCC2	0.248738	5.68455	0.105793	1
gene-PC|PC	0.379584	5.8755	0.105822	1
gene-CD3G|CD3G	-0.511303	4.57123	0.106173	1
gene-LOC121816476|LOC121816476	-1.24515	-0.911984	0.10628	1
gene-CILP2|CILP2	0.848019	-0.368343	0.106455	1
gene-LOC105604036|LOC105604036	0.527439	2.50524	0.106535	1
gene-LOC101105425|LOC101105425	0.2972	4.70463	0.106637	1
gene-NKX2-2|NKX2-2	-0.734251	1.23242	0.106669	1
gene-VILL|VILL	0.854556	3.69463	0.106779	1
gene-COLQ|COLQ	1.49251	-0.541003	0.106863	1
gene-NCS1|NCS1	-0.486009	2.39082	0.106875	1
gene-PTPRG|PTPRG	0.264954	5.5592	0.106954	1
gene-LOC114115891|LOC114115891	-1.1805	-0.158504	0.106985	1
gene-FIGNL2|FIGNL2	-0.705909	1.87576	0.107015	1
gene-TFCP2L1|TFCP2L1	0.340151	5.65683	0.107149	1
gene-OPALIN|OPALIN	1.85206	-0.45228	0.10716	1
gene-LOC121819235|LOC121819235	-1.45951	-0.658278	0.107347	1
gene-PIK3R6|PIK3R6	0.569417	2.86989	0.107441	1
gene-STK38L|STK38L	-0.339669	6.3271	0.107471	1
gene-MYO1G|MYO1G	-0.38447	4.51503	0.107528	1
gene-ADAM33|ADAM33	-0.415196	5.12796	0.107624	1
gene-SULT6B1|SULT6B1	0.620824	0.508868	0.107637	1
gene-THUMPD2|THUMPD2	-0.387766	3.29737	0.107729	1
gene-HMBOX1|HMBOX1	0.293856	5.17634	0.107749	1
gene-LOC105605390|LOC105605390	0.597039	2.52899	0.108024	1
gene-CISH|CISH	0.352045	5.11324	0.108182	1
gene-LOC121816015|LOC121816015	-1.08729	-0.230932	0.108216	1
gene-ECM2|ECM2	-0.414207	4.81073	0.108286	1
gene-SPON1|SPON1	0.340189	5.02122	0.108298	1
gene-LOC121820677|LOC121820677	-1.48368	0.478447	0.108515	1
gene-ANK1|ANK1	-0.821025	1.19763	0.108539	1
gene-LOC101112084|LOC101112084	-0.365005	4.71606	0.108848	1
gene-LAMA2|LAMA2	-0.283369	5.22008	0.108908	1
gene-LOC105610401|LOC105610401	-0.804165	0.400959	0.108988	1
gene-TNFSF13|TNFSF13	0.383195	5.03101	0.109115	1
gene-LOC101114865|LOC101114865	-0.486137	6.13583	0.109198	1
gene-PUSL1|PUSL1	0.458154	1.94305	0.109276	1
gene-LOC101106752|LOC101106752	-1.69527	-0.71581	0.109475	1
gene-IL17RB|IL17RB	0.54855	6.06875	0.109522	1
gene-LOC121820444|LOC121820444	0.818465	-0.43353	0.109622	1
gene-FCSK|FCSK	0.353626	5.82056	0.109641	1
gene-LOC121818564|LOC121818564	-1.24865	-0.274979	0.109704	1
gene-ITPRID1|ITPRID1	0.655033	2.43748	0.109753	1
gene-C1H3orf80|C1H3orf80	0.930026	-0.598427	0.109759	1
gene-LOC105610545|LOC105610545	1.398	-0.923425	0.109805	1
gene-FGFR1|FGFR1	0.292918	6.36176	0.109829	1
gene-LOC114114036|LOC114114036	0.262491	5.34653	0.109862	1
gene-LOC101120455|LOC101120455	0.611249	1.22435	0.109876	1
gene-PTPRC|PTPRC	-0.371685	7.36399	0.109907	1
gene-AQP3|AQP3	0.399527	6.093	0.110071	1
gene-STAP1|STAP1	0.467763	2.45041	0.110098	1
gene-ADCY5|ADCY5	-0.489003	2.82868	0.110152	1
gene-CRTAM|CRTAM	-0.635747	1.97906	0.110155	1
gene-GFUS|GFUS	0.250341	5.74026	0.110199	1
gene-LOC121819156|LOC121819156	-0.615751	1.51334	0.110236	1
gene-CAMKK2|CAMKK2	0.286122	5.97986	0.110255	1
gene-LOC121817758|LOC121817758	1.1962	-0.529209	0.110496	1
gene-LOC121816556|LOC121816556	-0.747371	1.40461	0.110508	1
gene-LOC101110727|LOC101110727	-3.07025	-1.04944	0.110534	1
gene-LOC100144429|LOC100144429	0.636478	3.12404	0.110702	1
gene-LOC121817360|LOC121817360	-0.897215	0.196901	0.110702	1
gene-TNFRSF13B|TNFRSF13B	0.461063	2.89756	0.110785	1
gene-SYCP3|SYCP3	-0.485406	2.50308	0.110812	1
gene-TUBAL3|TUBAL3	0.925927	1.21725	0.110942	1
gene-CHDH|CHDH	0.663823	2.89524	0.110982	1
gene-LOC101112109|LOC101112109	-0.295526	4.28872	0.111141	1
gene-LOC105605744|LOC105605744	0.42188	2.85513	0.111254	1
gene-LOC101102155|LOC101102155	-0.363847	5.89712	0.111286	1
gene-SLC2A3|SLC2A3	0.376022	5.18768	0.111293	1
gene-PPA2|PPA2	0.24559	5.33652	0.111359	1
gene-LOC121818376|LOC121818376	-0.660479	0.388038	0.111382	1
gene-PARP3|PARP3	0.481788	3.29728	0.111386	1
gene-RELB|RELB	-0.36981	3.83404	0.111659	1
gene-SFN|SFN	-0.687227	4.34951	0.111744	1
gene-LOC114110633|LOC114110633	-0.347628	6.19489	0.111967	1
gene-GM2A|GM2A	-0.318924	6.05546	0.112074	1
gene-LOC106990140|LOC106990140	-0.820742	0.817861	0.112364	1
gene-LOC114116356|LOC114116356	1.11514	-0.348859	0.112602	1
gene-TTC39C|TTC39C	-0.414733	3.03805	0.1127	1
gene-PLEKHN1|PLEKHN1	-0.497025	3.17535	0.112798	1
gene-TMEM121|TMEM121	-0.945679	-0.858701	0.1129	1
gene-LOC101102142|LOC101102142	-0.462124	4.11939	0.112926	1
gene-TREX1|TREX1	-0.675056	2.6698	0.113018	1
gene-ARMC12|ARMC12	0.483666	3.36969	0.113035	1
gene-LAMC2|LAMC2	-0.337826	6.7237	0.11305	1
gene-IL2RB|IL2RB	-0.37715	6.34976	0.113102	1
gene-CEMIP2|CEMIP2	0.275793	5.22672	0.113108	1
gene-LOC101123446|LOC101123446	-0.727738	1.84454	0.113129	1
gene-LOC101109935|LOC101109935	-0.401376	4.23333	0.113295	1
gene-SBSPON|SBSPON	-0.889011	0.976891	0.113296	1
gene-ACTG2|ACTG2	-0.565604	5.94177	0.113304	1
gene-NKX6-2|NKX6-2	0.500182	4.41043	0.113308	1
gene-DENND6A|DENND6A	-0.271851	5.04026	0.113309	1
gene-LOC101105154|LOC101105154	-0.589977	2.64048	0.113953	1
gene-HSPA12A|HSPA12A	-0.372091	3.08123	0.113968	1
gene-IGSF10|IGSF10	-0.701713	1.27183	0.113979	1
gene-ITGAM|ITGAM	0.575346	2.53881	0.114062	1
gene-LOC101116273|LOC101116273	0.264791	5.99776	0.114328	1
gene-FREM2|FREM2	-0.79492	0.803048	0.114425	1
gene-TRIM58|TRIM58	-0.998945	-0.077235	0.114511	1
gene-AIF1|AIF1	-0.440455	4.03835	0.114775	1
gene-HYKK|HYKK	-0.504339	2.59436	0.114803	1
gene-INSIG1|INSIG1	-0.326293	6.54518	0.114836	1
gene-ARHGDIG|ARHGDIG	0.536694	3.8366	0.115001	1
gene-LOC101110150|LOC101110150	0.523171	1.64785	0.115201	1
gene-CSF3R|CSF3R	0.744402	3.13258	0.115543	1
gene-TXNL4B|TXNL4B	-0.329337	4.50027	0.11556	1
gene-INPP4A|INPP4A	0.321477	6.41562	0.115588	1
gene-ARHGEF38|ARHGEF38	-0.390821	3.94074	0.115776	1
gene-ZSCAN23|ZSCAN23	-1.14041	-0.879424	0.115892	1
gene-LOC121816374|LOC121816374	0.417587	3.47645	0.115904	1
gene-CYSLTR2|CYSLTR2	0.519928	2.76824	0.115929	1
gene-LMO2|LMO2	-0.313803	4.03926	0.116149	1
gene-PLEKHO2|PLEKHO2	-0.328142	4.92274	0.116179	1
gene-LOC101105094|LOC101105094	1.2005	0.0545189	0.116182	1
gene-MXD1|MXD1	-0.411042	6.77831	0.116204	1
gene-RBM38|RBM38	-0.311421	4.25616	0.116235	1
gene-LOC101113398|LOC101113398	2.09358	2.40252	0.116394	1
gene-C14H19orf33|C14H19orf33	-0.305773	6.4404	0.116464	1
gene-CENPL|CENPL	-0.41969	3.77338	0.116526	1
gene-PLIN2|PLIN2	0.412311	4.10345	0.116602	1
gene-LOC101121132|LOC101121132	-0.34614	5.86441	0.116623	1
gene-PSMB9|PSMB9	-0.378468	7.04745	0.116646	1
gene-AK7|AK7	1.44518	-0.187614	0.116659	1
gene-MKRN2|MKRN2	-0.366709	6.16437	0.116775	1
gene-CHGA|CHGA	0.617018	8.62964	0.117008	1
gene-EXO5|EXO5	-0.436735	2.70446	0.11703	1
gene-SGCE|SGCE	-0.406837	2.86673	0.117141	1
gene-YPEL4|YPEL4	-0.578751	0.96074	0.117199	1
gene-SIAE|SIAE	0.269755	4.83122	0.117317	1
gene-LOC101117272|LOC101117272	-0.349055	5.05905	0.117388	1
gene-NFIL3|NFIL3	0.323418	3.91122	0.1174	1
gene-F3|F3	0.599603	5.74872	0.117415	1
gene-FRMPD2|FRMPD2	-1.80829	-0.962229	0.117583	1
gene-ASS1|ASS1	0.518766	2.23875	0.117607	1
gene-AFF1|AFF1	0.262844	6.56224	0.117723	1
gene-LOC101109545|LOC101109545	0.549194	4.86399	0.117741	1
gene-SHFL|SHFL	-0.325017	4.29974	0.117792	1
gene-TM7SF3|TM7SF3	0.279683	5.2831	0.117885	1
gene-PCDH19|PCDH19	-1.01379	0.254513	0.117975	1
gene-TMOD1|TMOD1	-0.768546	2.40022	0.117982	1
gene-LOC114115581|LOC114115581	-1.19361	-0.565789	0.11805	1
gene-LOC105613831|LOC105613831	-0.476426	2.7882	0.118296	1
gene-LOC121817110|LOC121817110	0.798932	-0.359543	0.118306	1
gene-LOC105609231|LOC105609231	1.13083	-0.398014	0.118354	1
gene-ZMAT1|ZMAT1	0.83246	-0.0353615	0.118355	1
gene-TBC1D4|TBC1D4	0.301955	6.33778	0.118377	1
gene-LOC121817258|LOC121817258	0.806489	-0.426457	0.118434	1
gene-SLC39A2|SLC39A2	0.612769	1.3139	0.118447	1
gene-QRICH2|QRICH2	1.06494	-0.0449011	0.118578	1
gene-GSDMB|GSDMB	-1.23062	-0.137612	0.118936	1
gene-LOC105612442|LOC105612442	0.68189	1.1157	0.118943	1
gene-HOMER2|HOMER2	0.276865	5.15295	0.119039	1
gene-LRRC24|LRRC24	0.311862	4.26515	0.119184	1
gene-VPREB3|VPREB3	0.534695	3.19999	0.119353	1
gene-LOC121818693|LOC121818693	-1.32696	-0.746893	0.119451	1
gene-LOC101111587|LOC101111587	-1.5521	-0.706504	0.119557	1
gene-CD74|CD74	-0.521357	9.86384	0.119563	1
gene-CTXN1|CTXN1	0.951828	-0.19864	0.119571	1
gene-ANKRD63|ANKRD63	-0.603568	1.56706	0.11981	1
gene-LOC121816042|LOC121816042	-1.32551	-0.58915	0.119868	1
gene-OVAR|OVAR	-0.6378	10.5779	0.119892	1
gene-TUBGCP3|TUBGCP3	0.261417	6.43832	0.119983	1
gene-LOC101121762|LOC101121762	-1.17311	0.185278	0.120023	1
gene-TREML2|TREML2	0.552645	1.36112	0.120049	1
gene-SLC18A1|SLC18A1	0.61356	1.98309	0.120127	1
gene-EPHB2|EPHB2	-0.588997	3.48083	0.120195	1
gene-TLDC2|TLDC2	-0.507273	1.97443	0.120409	1
gene-LRRC31|LRRC31	-1.0598	0.499601	0.120526	1
gene-SH3BGRL|SH3BGRL	-0.305555	4.42013	0.120534	1
gene-ID4|ID4	-0.423127	2.31459	0.120589	1
gene-LOC101106625|LOC101106625	0.708933	0.639025	0.120688	1
gene-KEF53_p05|ND4L	0.270599	10.3223	0.120739	1
gene-ANKRD50|ANKRD50	-0.243841	5.37246	0.120791	1
gene-SOCS1|SOCS1	0.500668	3.4861	0.120885	1
gene-AP5B1|AP5B1	-0.297354	4.53645	0.121172	1
gene-OSGIN1|OSGIN1	0.356143	3.58424	0.121249	1
gene-HIPK2|HIPK2	0.269138	6.59335	0.121355	1
gene-AOAH|AOAH	-0.571881	4.04732	0.121553	1
gene-LOC114113677|LOC114113677	-1.09719	-1.14172	0.121632	1
gene-LOC114116109|LOC114116109	0.378414	4.31469	0.121813	1
gene-HK1|HK1	0.292835	7.72675	0.121863	1
gene-TINAGL1|TINAGL1	-0.270199	6.78141	0.122015	1
gene-HMCN2|HMCN2	-0.405107	5.33823	0.122017	1
gene-LOC105608584|LOC105608584	-1.1774	-0.80984	0.122104	1
gene-HOXC5|HOXC5	-1.04271	-0.153843	0.122137	1
gene-PLAUR|PLAUR	-0.331528	5.3326	0.122159	1
gene-ZNF629|ZNF629	0.291132	5.40731	0.122336	1
gene-H1-2|H1-2	0.72968	-0.22029	0.12242	1
gene-LOC101105810|LOC101105810	-0.513795	5.79352	0.122433	1
gene-LOC101119153|LOC101119153	1.05285	0.464602	0.122515	1
gene-LOC114110332|LOC114110332	0.454274	6.63025	0.122549	1
gene-LOC121817760|LOC121817760	-0.496884	1.55405	0.122612	1
gene-SEC11C|SEC11C	0.270159	6.3088	0.122773	1
gene-ETV4|ETV4	-0.524975	5.6725	0.122792	1
gene-PKD2|PKD2	-0.275941	4.99261	0.122995	1
gene-LOC121817256|LOC121817256	-0.445677	2.23258	0.123011	1
gene-C2CD4A|C2CD4A	0.619873	1.79132	0.123203	1
gene-ZNF668|ZNF668	0.411243	2.68422	0.123223	1
gene-LOC114114978|LOC114114978	-0.692992	0.484713	0.123497	1
gene-ZNF385B|ZNF385B	-2.04517	-0.656683	0.123593	1
gene-GADD45B|GADD45B	-0.407165	3.41036	0.123724	1
gene-CCPG1|CCPG1	0.288695	7.44039	0.123805	1
gene-PREB|PREB	-0.273124	6.96422	0.123822	1
gene-LDHA|LDHA	0.330871	7.04197	0.123837	1
gene-PGC|PGC	-0.5895	8.82698	0.123839	1
gene-LOC105604896|LOC105604896	-0.776884	0.27822	0.124009	1
gene-LOC121819040|LOC121819040	-0.730179	1.86596	0.124155	1
gene-RGN|RGN	-0.963855	0.14061	0.124173	1
gene-LOC114116600|LOC114116600	0.804902	0.389538	0.124214	1
gene-DSEL|DSEL	0.358309	4.33797	0.124278	1
gene-LOC121819612|LOC121819612	-0.511409	1.22677	0.124419	1
gene-LOC121818802|LOC121818802	-0.847475	-0.381945	0.12471	1
gene-SH3GL2|SH3GL2	-0.548437	4.67152	0.124802	1
gene-LOC101105064|LOC101105064	0.38099	4.59629	0.124843	1
gene-LOC105601912|LOC105601912	-0.721767	-0.0756243	0.124866	1
gene-LOC114112790|LOC114112790	1.1038	-0.93904	0.124915	1
gene-NRG1|NRG1	-0.451179	3.37516	0.125017	1
gene-LOC121819694|LOC121819694	-0.564646	1.08544	0.125033	1
gene-ZMYND8|ZMYND8	0.242178	6.40629	0.12507	1
gene-LOC114113240|LOC114113240	0.52784	2.24261	0.125104	1
gene-STYXL1|STYXL1	1.00787	0.224819	0.125106	1
gene-PER1|PER1	0.35883	6.6159	0.125179	1
gene-CHRD|CHRD	-0.642219	1.42817	0.125232	1
gene-RNF149|RNF149	0.453325	6.18945	0.125242	1
gene-LOC121817420|LOC121817420	-0.582326	3.82632	0.12548	1
gene-CNRIP1|CNRIP1	0.455974	4.29916	0.125503	1
gene-TREM2|TREM2	-1.17856	-0.486208	0.125563	1
gene-RHOD|RHOD	-0.45989	4.41225	0.125605	1
gene-ANGPTL2|ANGPTL2	-0.416371	4.22114	0.125707	1
gene-LOC114114483|LOC114114483	-0.420353	8.02473	0.125826	1
gene-LOC105606886|LOC105606886	-0.435938	2.30721	0.125829	1
gene-MS4A8|MS4A8	-0.678732	4.64577	0.125951	1
gene-C1QL1|C1QL1	-0.727458	0.888154	0.125965	1
gene-KIF26B|KIF26B	-0.607685	2.31535	0.126058	1
gene-LOC121820785|LOC121820785	1.90031	-0.281688	0.126325	1
gene-PTP4A3|PTP4A3	-0.471312	2.08811	0.126657	1
gene-LBR|LBR	-0.264718	5.92521	0.126659	1
gene-LRRC8A|LRRC8A	0.24653	6.2601	0.126712	1
gene-NKPD1|NKPD1	0.752215	0.289616	0.126742	1
gene-VWA5A|VWA5A	0.387364	6.01012	0.126987	1
gene-LOC101109601|LOC101109601	-1.29503	-0.865893	0.127002	1
gene-AMPD3|AMPD3	0.413115	5.64413	0.127067	1
gene-CDH19|CDH19	-0.550995	1.31144	0.127203	1
gene-SLC38A1|SLC38A1	0.334115	4.11458	0.127391	1
gene-LOC101116641|LOC101116641	-1.51222	0.110439	0.127647	1
gene-DLEC1|DLEC1	0.490437	2.74387	0.127675	1
gene-LOC105605487|LOC105605487	-0.364104	3.38994	0.127795	1
gene-MYOM3|MYOM3	-0.611106	0.890742	0.127872	1
gene-LEKR1|LEKR1	0.810648	0.19166	0.127905	1
gene-HSD17B14|HSD17B14	1.17046	-0.309204	0.127959	1
gene-LOC105614607|LOC105614607	-0.504084	4.10534	0.128043	1
gene-TNFRSF9|TNFRSF9	-0.679852	1.72568	0.128098	1
gene-WNK2|WNK2	0.342147	4.72173	0.128101	1
gene-MS4A2|MS4A2	0.980444	1.39837	0.128114	1
gene-LOC114110645|LOC114110645	0.819678	-0.389417	0.128274	1
gene-DAGLA|DAGLA	0.341663	4.85665	0.128491	1
gene-TSPYL5|TSPYL5	-0.412949	2.57318	0.128653	1
gene-CCDC158|CCDC158	0.365803	3.62219	0.128734	1
gene-LOC101105035|LOC101105035	-0.594904	2.58446	0.128795	1
gene-ANKS4B|ANKS4B	-0.443938	5.36224	0.128914	1
gene-LOC101115846|LOC101115846	-0.791055	-0.31438	0.128955	1
gene-PDZRN4|PDZRN4	-0.68335	0.300348	0.129003	1
gene-SEMA4G|SEMA4G	-0.314607	6.76494	0.129015	1
gene-LOC114116188|LOC114116188	-0.781849	0.749767	0.129041	1
gene-SLC41A1|SLC41A1	0.233832	6.25168	0.129093	1
gene-TMEM265|TMEM265	-0.322157	3.8166	0.12913	1
gene-TAP1|TAP1	-0.334892	7.85601	0.12932	1
gene-LOC121819584|LOC121819584	-0.6748	0.571959	0.129336	1
gene-MPL|MPL	0.992108	-0.645948	0.129403	1
gene-ASIC3|ASIC3	-1.0996	-0.459341	0.129508	1
gene-C22H10orf95|C22H10orf95	0.365125	4.0457	0.12953	1
gene-LOC101116441|LOC101116441	-0.472347	3.05671	0.129815	1
gene-MLKL|MLKL	-0.316732	5.05623	0.129975	1
gene-SLC7A14|SLC7A14	-0.943211	0.120051	0.130054	1
gene-LOC101109032|LOC101109032	0.261737	6.79763	0.130085	1
gene-NR4A2|NR4A2	0.303347	5.34573	0.130096	1
gene-LOC121820746|LOC121820746	0.95694	-0.496877	0.1302	1
gene-FAM13A|FAM13A	0.359816	6.78912	0.130473	1
gene-UBE2L6|UBE2L6	-0.271219	5.79759	0.130544	1
gene-LOC114111478|LOC114111478	-0.336418	5.02606	0.13055	1
gene-LOC101112480|LOC101112480	0.315042	5.90751	0.130693	1
gene-LOC101106925|LOC101106925	-0.353053	5.29735	0.130844	1
gene-LOC105613289|LOC105613289	0.285017	4.63027	0.130952	1
gene-VOPP1|VOPP1	-0.562777	2.31439	0.130976	1
gene-KLF10|KLF10	0.28609	6.30621	0.131174	1
gene-LOC101115331|LOC101115331	-0.267544	5.00626	0.13131	1
gene-TCAF1|TCAF1	0.256936	7.31233	0.131645	1
gene-CD9|CD9	-0.359808	8.29046	0.131827	1
gene-BNIPL|BNIPL	0.422202	4.12962	0.131916	1
gene-TUFM|TUFM	0.247263	6.54316	0.131951	1
gene-LOC121817546|LOC121817546	-1.09001	-0.719607	0.131956	1
gene-REG4|REG4	-1.74892	-0.309164	0.13221	1
gene-PIGM|PIGM	-0.471334	4.28883	0.132495	1
gene-B3GNT5|B3GNT5	-0.300443	5.14889	0.132597	1
gene-H1-4|H1-4	0.796174	-0.593996	0.13278	1
gene-G0S2|G0S2	0.501125	2.57241	0.132847	1
gene-FAM131B|FAM131B	0.836791	1.84656	0.133009	1
gene-SALL1|SALL1	-0.486857	2.70403	0.133233	1
gene-TCF21|TCF21	-0.374029	4.21352	0.13327	1
gene-LOC114118012|LOC114118012	0.775984	-0.245626	0.133369	1
gene-LOC105608463|LOC105608463	-0.783125	0.34378	0.133609	1
gene-EDIL3|EDIL3	-0.922181	0.68414	0.133625	1
gene-LOC105608763|LOC105608763	0.80384	0.627259	0.133782	1
gene-LOC105610484|LOC105610484	0.471987	2.30196	0.133786	1
gene-LOC114117536|LOC114117536	-0.686952	0.602405	0.13381	1
gene-LAMA4|LAMA4	-0.27597	6.39969	0.133863	1
gene-SDC2|SDC2	-0.326672	5.30665	0.133933	1
gene-EIF2AK4|EIF2AK4	0.249045	6.36923	0.133937	1
gene-SH2D1A|SH2D1A	0.728704	0.940313	0.134027	1
gene-CCR3|CCR3	1.2461	-0.363465	0.134077	1
gene-LOC121817800|LOC121817800	-0.335414	3.81851	0.134115	1
gene-BARD1|BARD1	-0.464151	2.2318	0.134252	1
gene-LOC114118739|LOC114118739	0.52409	1.41833	0.134255	1
gene-PARP12|PARP12	-0.333486	5.98547	0.134359	1
gene-LOC114114849|LOC114114849	0.747969	0.207128	0.134438	1
gene-LOC114118877|LOC114118877	0.558245	7.75126	0.134445	1
gene-LOC114109592|LOC114109592	0.675491	0.253651	0.134561	1
gene-EMP1|EMP1	-0.435715	7.3349	0.134586	1
gene-TMC1|TMC1	-1.2778	-0.846349	0.134785	1
gene-POF1B|POF1B	-0.376539	5.28954	0.134971	1
gene-SLC26A2|SLC26A2	-0.323688	7.31821	0.134979	1
gene-MMP16|MMP16	-0.454683	3.02471	0.134993	1
gene-LOC114114024|LOC114114024	-1.03226	-0.290216	0.135419	1
gene-ERN2|ERN2	-0.290953	8.05419	0.135553	1
gene-RAB3C|RAB3C	0.350304	4.55989	0.135702	1
gene-LOC105608013|LOC105608013	-0.303538	4.55488	0.135702	1
gene-LOC121818644|LOC121818644	0.712822	0.136203	0.135741	1
gene-AGR3|AGR3	-1.96938	2.27242	0.135976	1
gene-CDX1|CDX1	-1.94536	-0.725538	0.136014	1
gene-PPP2R2B|PPP2R2B	-1.00843	-0.406607	0.136026	1
gene-LOC101119685|LOC101119685	-0.315577	4.73605	0.136074	1
gene-LOC121818700|LOC121818700	-1.15822	-0.100829	0.136155	1
gene-LOC121819868|LOC121819868	-1.15802	-1.10355	0.136171	1
gene-LOC121819520|LOC121819520	-1.50176	-0.894503	0.136335	1
gene-METTL9|METTL9	0.230508	5.76938	0.136354	1
gene-HMGB2|HMGB2	-0.286947	6.58657	0.136354	1
gene-NKG7|NKG7	-0.450354	4.82734	0.136518	1
gene-LOC114111040|LOC114111040	-0.768752	-0.0844809	0.136566	1
gene-LOC114110259|LOC114110259	0.506496	4.04382	0.136616	1
gene-MAP3K10|MAP3K10	0.292468	4.28316	0.136753	1
gene-MAMSTR|MAMSTR	-0.509627	3.47201	0.136793	1
gene-DRC3|DRC3	1.57622	-0.823558	0.137055	1
gene-SLC16A5|SLC16A5	-0.284651	5.1945	0.137087	1
gene-B3GNT7|B3GNT7	-0.555714	5.33239	0.137176	1
gene-KCNK2|KCNK2	-0.871084	2.47235	0.137228	1
gene-ZNF608|ZNF608	0.288957	4.88068	0.137349	1
gene-CIB2|CIB2	0.341776	3.60366	0.137447	1
gene-SUMF2|SUMF2	0.272054	4.86646	0.137466	1
gene-ICOS|ICOS	0.421466	3.73773	0.137539	1
gene-LOC101113060|LOC101113060	-1.73216	-0.48795	0.137604	1
gene-PRTG|PRTG	1.08827	-0.42104	0.137649	1
gene-TBX3|TBX3	-0.432147	2.2804	0.137725	1
gene-LOC101108092|LOC101108092	-0.351243	3.99786	0.137739	1
gene-LPO|LPO	-1.29226	-0.527172	0.137863	1
gene-TAP2|TAP2	-0.317671	7.38925	0.137909	1
gene-YBX3|YBX3	0.266657	7.02656	0.137978	1
gene-TCIM|TCIM	0.259042	6.35153	0.138021	1
gene-STBD1|STBD1	0.485988	2.71696	0.138081	1
gene-MOB3B|MOB3B	-0.588436	2.85028	0.13819	1
gene-LAPTM4B|LAPTM4B	-0.249583	7.32927	0.138305	1
gene-LOC101117153|LOC101117153	0.241293	5.56428	0.138318	1
gene-PKDCC|PKDCC	-0.411257	4.51162	0.138319	1
gene-FAM234B|FAM234B	0.339486	5.8897	0.138393	1
gene-GALNT13|GALNT13	0.757531	0.612704	0.138402	1
gene-ZCCHC2|ZCCHC2	-0.259827	5.01139	0.138414	1
gene-SHOX2|SHOX2	1.4848	-1.02649	0.138503	1
gene-ZNF703|ZNF703	-0.542005	3.57294	0.138536	1
gene-RYR3|RYR3	-0.490808	1.8061	0.138591	1
gene-CCDC141|CCDC141	-0.737508	3.15654	0.138691	1
gene-LOC114108604|LOC114108604	-0.354155	11.6165	0.138805	1
gene-CYP2D6|CYP2D6	0.358366	5.47481	0.139	1
gene-LIMS2|LIMS2	-0.348951	3.66798	0.139236	1
gene-LOC121817059|LOC121817059	0.404842	6.83219	0.13928	1
gene-KEF53_p01|CYTB	0.249329	12.4422	0.139322	1
gene-ARSJ|ARSJ	-0.508849	2.58786	0.139517	1
gene-LOC101106734|LOC101106734	0.574273	2.02908	0.139563	1
gene-BICC1|BICC1	-0.341219	3.23013	0.139707	1
gene-LOC105603384|LOC105603384	0.354904	3.50538	0.139765	1
gene-ROBO2|ROBO2	-0.368884	3.37027	0.139803	1
gene-CPT1B|CPT1B	0.442507	3.24836	0.139885	1
gene-MRPL53|MRPL53	0.222753	5.52871	0.139956	1
gene-FAM43B|FAM43B	-1.12203	-1.06788	0.139978	1
gene-FOSL1|FOSL1	0.83194	2.8604	0.140011	1
gene-LAPTM5|LAPTM5	-0.352573	7.90254	0.140173	1
gene-HPN|HPN	0.365829	6.7175	0.140251	1
gene-CCDC102B|CCDC102B	-0.55466	1.53405	0.140381	1
gene-UBXN10|UBXN10	0.5107	2.85254	0.140423	1
gene-USP13|USP13	-0.345994	4.38107	0.140433	1
gene-ZC3H7B|ZC3H7B	0.258859	6.67807	0.140435	1
gene-LOC114115734|LOC114115734	-0.588195	0.574628	0.140465	1
gene-LOC121816877|LOC121816877	-0.533191	6.59341	0.140545	1
gene-LOC105605640|LOC105605640	2.29439	-0.527202	0.140552	1
gene-TGFB3|TGFB3	-0.438799	2.12501	0.140593	1
gene-LOC105616285|LOC105616285	-0.823717	0.208383	0.14061	1
gene-PPARG|PPARG	-0.261814	5.58336	0.140643	1
gene-UBXN8|UBXN8	0.328596	3.63165	0.140839	1
gene-LOC101111496|LOC101111496	-0.24955	5.94814	0.140849	1
gene-LOC105608876|LOC105608876	-1.31746	-0.0940431	0.140878	1
gene-FSCN1|FSCN1	-0.254065	5.03249	0.140904	1
gene-MUC5B|MUC5B	-1.23284	3.87798	0.140964	1
gene-ITSN1|ITSN1	0.253432	6.59901	0.141164	1
gene-LOC121820694|LOC121820694	-0.887812	2.12245	0.141331	1
gene-MAT1A|MAT1A	0.836827	2.79163	0.141343	1
gene-ERO1B|ERO1B	0.536533	6.64524	0.141472	1
gene-DNM3|DNM3	-0.61339	0.561416	0.141762	1
gene-CHST15|CHST15	-0.371501	3.59047	0.142079	1
gene-RORA|RORA	-0.264679	5.2399	0.142119	1
gene-OLFML2B|OLFML2B	0.512322	2.73959	0.14212	1
gene-LOC121816699|LOC121816699	0.264423	5.10142	0.142244	1
gene-WNT11|WNT11	-0.897996	-0.131558	0.142258	1
gene-RMDN3|RMDN3	-0.251175	4.95658	0.142319	1
gene-LOC101118990|LOC101118990	-0.745385	3.28246	0.142461	1
gene-TCIRG1|TCIRG1	-0.254387	5.78868	0.142603	1
gene-LOC121816913|LOC121816913	-1.15524	-0.968749	0.142608	1
gene-MS4A18|MS4A18	-2.34192	-0.93655	0.14271	1
gene-KEF53_t20	0.46159	3.63421	0.142914	1
gene-MAST4|MAST4	0.268454	5.30817	0.143049	1
gene-AFAP1L2|AFAP1L2	-0.371728	4.7687	0.143073	1
gene-LOC105602261|LOC105602261	-0.885875	-0.226036	0.143132	1
gene-NT5C3B|NT5C3B	0.317687	4.00387	0.143413	1
gene-LOC106991596|LOC106991596	0.578763	1.88225	0.143484	1
gene-NOCT|NOCT	-0.449316	2.89822	0.143568	1
gene-LOC114115676|LOC114115676	-1.1958	-1.09999	0.143578	1
gene-SYTL5|SYTL5	0.41108	4.42817	0.143606	1
gene-ZNF774|ZNF774	0.47647	1.68299	0.143739	1
gene-BTBD19|BTBD19	0.343913	3.2214	0.143961	1
gene-LOC101117706|LOC101117706	0.510268	2.83383	0.143975	1
gene-IGLON5|IGLON5	-0.577157	0.986983	0.144184	1
gene-TCFL5|TCFL5	-0.420516	2.18721	0.144202	1
gene-EZH2|EZH2	-0.3099	5.06063	0.144211	1
gene-MCFD2|MCFD2	0.314293	6.21431	0.144225	1
gene-STEAP1|STEAP1	0.706506	0.13112	0.144299	1
gene-ZNF541|ZNF541	1.05934	-1.06109	0.144316	1
gene-IRAK2|IRAK2	-0.377318	3.67204	0.144492	1
gene-PPCDC|PPCDC	0.26959	4.47728	0.144546	1
gene-LOC121817288|LOC121817288	0.888719	-0.165856	0.144678	1
gene-GPR143|GPR143	2.22144	0.00467753	0.144692	1
gene-FRMD6|FRMD6	-0.294202	4.10868	0.144757	1
gene-TTC9B|TTC9B	0.715728	0.558665	0.144761	1
gene-TFPT|TFPT	0.377458	3.39098	0.144995	1
gene-COQ5|COQ5	0.249067	4.81837	0.145106	1
gene-NFATC2|NFATC2	-0.311229	4.56838	0.145283	1
gene-PRSS33|PRSS33	-0.58329	0.886171	0.145335	1
gene-LOC101110939|LOC101110939	-0.551936	4.42726	0.14601	1
gene-C12H1orf21|C12H1orf21	-0.352535	3.72698	0.146018	1
gene-PER2|PER2	0.328216	6.26429	0.146058	1
gene-ZNF585B|ZNF585B	-0.674436	0.836456	0.146078	1
gene-LOC114112928|LOC114112928	-0.62466	0.78556	0.146109	1
gene-TSC22D3|TSC22D3	0.281873	6.9091	0.146252	1
gene-PIK3R5|PIK3R5	0.318918	5.27873	0.146267	1
gene-FUOM|FUOM	-0.687654	3.21802	0.146329	1
gene-LOC114117860|LOC114117860	-0.427658	3.01515	0.146381	1
gene-LOC114118380|LOC114118380	-0.450714	1.38496	0.146392	1
gene-TBX2|TBX2	-0.305743	4.78601	0.146483	1
gene-LOC121820358|LOC121820358	-1.02246	-0.795943	0.146539	1
gene-RASA4B|RASA4B	0.315437	3.77509	0.146607	1
gene-GPR4|GPR4	0.483883	1.6016	0.146655	1
gene-DGKE|DGKE	-0.268421	4.4795	0.146711	1
gene-ADM2|ADM2	0.367756	4.78234	0.146718	1
gene-ATP8B4|ATP8B4	-0.403878	3.44765	0.146746	1
gene-LOC105610032|LOC105610032	-1.04452	-0.698776	0.146811	1
gene-ASB9|ASB9	-1.23433	-0.750344	0.146853	1
gene-KEL|KEL	-1.32464	0.19577	0.146999	1
gene-REELD1|REELD1	0.663462	0.297214	0.14704	1
gene-TIAM1|TIAM1	0.463876	2.88638	0.147231	1
gene-HUWE1|HUWE1	0.233691	8.99673	0.147247	1
gene-PTGES3L|PTGES3L	0.482648	1.32059	0.147506	1
gene-LOC121817378|LOC121817378	0.478635	1.74131	0.14754	1
gene-EPHA4|EPHA4	-0.416749	3.05167	0.147832	1
gene-LOC101111694|LOC101111694	-0.491984	6.26992	0.147952	1
gene-NKX3-1|NKX3-1	-0.357355	5.10686	0.147982	1
gene-SLC39A8|SLC39A8	0.378388	3.51699	0.148084	1
gene-LOC121816884|LOC121816884	0.672185	6.71575	0.148355	1
gene-POLD3|POLD3	-0.270277	5.55756	0.148579	1
gene-CTSS|CTSS	-0.36935	6.41272	0.148682	1
gene-PDCD1LG2|PDCD1LG2	-0.544033	2.69445	0.148758	1
gene-CCNG1|CCNG1	0.323839	8.94726	0.148777	1
gene-BST-2A|BST-2A	-0.555774	2.1823	0.148846	1
gene-THAP12|THAP12	0.214006	6.00769	0.148942	1
gene-LOC105605139|LOC105605139	-1.15655	-0.751693	0.148947	1
gene-LACC1|LACC1	-0.299334	4.80296	0.148992	1
gene-LOC121820019|LOC121820019	0.617629	0.684617	0.149003	1
gene-LOC105613366|LOC105613366	-1.17737	0.0706494	0.149102	1
gene-ANO9|ANO9	-0.250203	5.31499	0.14912	1
gene-CD180|CD180	-0.636766	2.14814	0.149221	1
gene-LOC101108797|LOC101108797	0.975815	0.756967	0.149311	1
gene-B2M|B2M	-0.34181	11.3373	0.149731	1
gene-LOC121816195|LOC121816195	0.386416	2.96252	0.149812	1
gene-SCN1A|SCN1A	-1.29702	-0.738517	0.149838	1
gene-SARM1|SARM1	-0.264192	5.88775	0.149852	1
gene-LOC114116098|LOC114116098	0.357734	3.19393	0.15009	1
gene-LOC105616860|LOC105616860	0.963937	2.48676	0.150322	1
gene-HAP1|HAP1	-0.502522	5.07068	0.150371	1
gene-LOC114109385|LOC114109385	-0.863817	-0.544521	0.15069	1
gene-DTX4|DTX4	-0.23932	6.86782	0.150837	1
gene-LOC114114576|LOC114114576	-0.354424	5.6434	0.150955	1
gene-IRF4|IRF4	0.336147	5.82858	0.151127	1
gene-ISLR2|ISLR2	-1.07442	-0.449389	0.151275	1
gene-SCN10A|SCN10A	1.56085	-0.913024	0.151303	1
gene-CD55|CD55	-0.398399	6.17658	0.151522	1
gene-LIAS|LIAS	0.293276	3.90847	0.151528	1
gene-LOC101119648|LOC101119648	-0.396962	3.36137	0.151546	1
gene-PDZRN3|PDZRN3	-0.333289	3.8841	0.151651	1
gene-NAAA|NAAA	-0.346656	5.51264	0.151678	1
gene-TLE7|TLE7	-0.656777	0.308518	0.151741	1
gene-ZNF382|ZNF382	-0.401857	2.21206	0.151752	1
gene-FOXH1|FOXH1	-0.605848	0.571032	0.1519	1
gene-PDHB|PDHB	0.225718	6.92547	0.151915	1
gene-LRRC4B|LRRC4B	-0.644456	-0.0500873	0.151985	1
gene-LOC101111664|LOC101111664	-0.671607	1.39859	0.152191	1
gene-DSC2|DSC2	-0.301925	7.54422	0.15225	1
gene-PCSK5|PCSK5	-0.525876	3.52661	0.152276	1
gene-MUC5AC|MUC5AC	-0.697468	12.0514	0.152282	1
gene-NEFM|NEFM	-0.698115	0.0407193	0.152361	1
gene-TEX12|TEX12	-1.26555	-0.590047	0.152408	1
gene-ASB5|ASB5	-0.946034	0.0618046	0.152428	1
gene-AZGP1|AZGP1	-0.777104	3.22336	0.15245	1
gene-ABCA3|ABCA3	0.22448	7.70181	0.152467	1
gene-GPAM|GPAM	0.25233	5.4629	0.152495	1
gene-PSME2|PSME2	-0.253433	7.30639	0.152538	1
gene-BST-2B|BST-2B	-0.708872	4.48067	0.152581	1
gene-LOC443442|LOC443442	1.44932	-0.221061	0.15273	1
gene-LOC121816367|LOC121816367	0.873649	-0.566862	0.152852	1
gene-LOC101108071|LOC101108071	1.71509	2.74942	0.152915	1
gene-ZNF367|ZNF367	-0.358513	3.93129	0.153028	1
gene-SUCO|SUCO	0.235376	6.00638	0.153183	1
gene-AP1S2|AP1S2	-0.284336	4.32321	0.153187	1
gene-PON2|PON2	-0.409165	5.38649	0.153216	1
gene-ACSL1|ACSL1	0.282813	7.92958	0.153293	1
gene-LOC106990092|LOC106990092	0.270474	7.23459	0.153507	1
gene-FOXO3|FOXO3	0.277466	5.29218	0.153528	1
gene-CD37|CD37	-0.359927	4.09046	0.153553	1
gene-LOC114110632|LOC114110632	-1.27598	-0.374876	0.153575	1
gene-PLOD1|PLOD1	0.270781	5.49209	0.153644	1
gene-LOC121820716|LOC121820716	0.476681	1.1042	0.153726	1
gene-COPS9|COPS9	0.252595	4.93631	0.153923	1
gene-LOC121817270|LOC121817270	-0.843292	-0.284827	0.153939	1
gene-CRISPLD1|CRISPLD1	-0.658407	1.10625	0.153968	1
gene-ANKRD44|ANKRD44	-0.254555	5.41203	0.154097	1
gene-KCNH6|KCNH6	0.434893	2.25784	0.154146	1
gene-KDR|KDR	0.245754	6.23056	0.15424	1
gene-LOC114110822|LOC114110822	-0.373292	4.07149	0.154274	1
gene-C2H2orf72|C2H2orf72	0.257009	7.28093	0.154275	1
gene-MMRN1|MMRN1	-0.529723	3.38448	0.154334	1
gene-LOC101105802|LOC101105802	-0.370755	2.44881	0.154375	1
gene-LOC105610709|LOC105610709	-0.641007	0.164364	0.15442	1
gene-FRMD4A|FRMD4A	0.401323	2.62379	0.154458	1
gene-HS3ST6|HS3ST6	0.565239	0.437102	0.154533	1
gene-HOOK1|HOOK1	0.228383	5.84925	0.154605	1
gene-DUSP2|DUSP2	-0.399017	2.39794	0.154684	1
gene-DOP1B|DOP1B	-0.24653	6.03288	0.1548	1
gene-ST6GALNAC3|ST6GALNAC3	0.505278	2.1505	0.154893	1
gene-LOC101111119|LOC101111119	0.292396	4.28169	0.155108	1
gene-MTFR1L|MTFR1L	0.229606	5.01336	0.155172	1
gene-COL5A1|COL5A1	-0.33865	6.75619	0.15522	1
gene-LOC106990841|LOC106990841	0.631422	0.876625	0.155256	1
gene-COBL|COBL	0.278238	5.45696	0.155352	1
gene-LOC101107920|LOC101107920	-0.236812	5.49167	0.155367	1
gene-LOC121817084|LOC121817084	-0.915898	-0.53877	0.155391	1
gene-LOC106991732|LOC106991732	-0.798047	-0.243964	0.155404	1
gene-CCDC115|CCDC115	-0.217847	5.89546	0.155414	1
gene-CHRDL2|CHRDL2	0.679627	2.98333	0.155484	1
gene-LOC121820775|LOC121820775	1.06538	-0.655634	0.155671	1
gene-ALDH18A1|ALDH18A1	0.265477	6.28837	0.155936	1
gene-PDGFD|PDGFD	-0.241063	5.31279	0.155982	1
gene-MGAT4A|MGAT4A	0.257546	7.44817	0.156013	1
gene-ATF5|ATF5	0.434913	5.75739	0.156074	1
gene-PTPMT1|PTPMT1	0.258864	4.23776	0.156085	1
gene-LOC114118046|LOC114118046	0.453966	3.24474	0.156251	1
gene-RASL12|RASL12	-0.531639	1.79559	0.156433	1
gene-MS4A1|MS4A1	-0.578176	2.83765	0.156449	1
gene-DDO|DDO	0.498583	3.26709	0.15652	1
gene-CCDC3|CCDC3	-0.63946	1.75061	0.156543	1
gene-AK4|AK4	0.583834	1.60137	0.156757	1
gene-VCPIP1|VCPIP1	-0.246907	6.17703	0.156773	1
gene-MDK|MDK	-0.454114	2.91298	0.156807	1
gene-LOC114114086|LOC114114086	0.251045	6.96092	0.156813	1
gene-CCNB1IP1|CCNB1IP1	-1.17422	-0.0180148	0.156839	1
gene-RNF19B|RNF19B	-0.296148	5.19344	0.156862	1
gene-LOC101114793|LOC101114793	-0.573716	2.66043	0.157027	1
gene-CLUH|CLUH	0.246968	7.05738	0.157032	1
gene-LOC121818302|LOC121818302	-0.675317	0.100752	0.157049	1
gene-ATXN1|ATXN1	0.229844	6.01638	0.157054	1
gene-LOC105606267|LOC105606267	0.4256	2.57789	0.15708	1
gene-CD84|CD84	-0.441904	3.16571	0.157143	1
gene-MYBL1|MYBL1	-0.370374	3.72492	0.157212	1
gene-KPNA5|KPNA5	0.394943	2.34557	0.157255	1
gene-STAG1|STAG1	-0.215627	5.72767	0.157268	1
gene-PLAC9|PLAC9	0.411853	2.86237	0.15727	1
gene-LOC105613564|LOC105613564	-0.604986	2.34244	0.157454	1
gene-COX5A|COX5A	0.236602	7.55228	0.157495	1
gene-SP4|SP4	-0.307365	3.86141	0.157573	1
gene-NMI|NMI	-0.254963	6.43825	0.15762	1
gene-LYL1|LYL1	-0.413983	2.73859	0.157659	1
gene-LOC114110219|LOC114110219	-0.727707	-0.245537	0.157688	1
gene-LOC121820461|LOC121820461	-0.899161	-0.462305	0.15776	1
gene-LOC101119765|LOC101119765	0.311516	3.38823	0.158047	1
gene-PECR|PECR	0.331981	3.77876	0.158057	1
gene-LOC101123370|LOC101123370	-0.741308	3.07391	0.158122	1
gene-VPS28|VPS28	0.233643	6.26636	0.158178	1
gene-CEP72|CEP72	-0.424027	4.79827	0.158243	1
gene-ARL5C|ARL5C	-0.80154	1.01228	0.158261	1
gene-LOC101102845|LOC101102845	1.07407	-0.0210881	0.158277	1
gene-SMIM24|SMIM24	1.07019	-0.20006	0.158313	1
gene-TMEM254|TMEM254	0.246307	5.49446	0.158505	1
gene-LOC121820615|LOC121820615	-0.653541	1.08799	0.158637	1
gene-SRRM3|SRRM3	0.571548	1.39493	0.158648	1
gene-STK17B|STK17B	-0.302913	6.64841	0.158701	1
gene-PLEKHA4|PLEKHA4	-0.345189	3.69139	0.158756	1
gene-LOC105607801|LOC105607801	-0.739918	1.87129	0.158822	1
gene-PIH1D2|PIH1D2	-0.41888	1.84315	0.158834	1
gene-ACO1|ACO1	0.264668	7.41394	0.158979	1
gene-LOC114114084|LOC114114084	0.338916	4.25482	0.159076	1
gene-CLDN11|CLDN11	-0.679088	0.197752	0.159093	1
gene-LOC105612389|LOC105612389	-0.646349	0.359569	0.159122	1
gene-PLP1|PLP1	-0.731712	-0.181968	0.159192	1
gene-LOC114117838|LOC114117838	-1.29762	-0.866618	0.159381	1
gene-CD40LG|CD40LG	0.576707	0.976604	0.159417	1
gene-KCNIP1|KCNIP1	-0.798638	-0.0722787	0.159471	1
gene-AK8|AK8	0.443638	1.84066	0.159505	1
gene-HSD17B1|HSD17B1	-0.993258	0.743241	0.159516	1
gene-SEMA4D|SEMA4D	-0.230715	5.75387	0.159525	1
gene-LOC114114855|LOC114114855	-0.529757	1.37173	0.159546	1
gene-OVGP1|OVGP1	-0.821528	0.554283	0.159588	1
gene-MAP4K4|MAP4K4	-0.217633	5.85199	0.159627	1
gene-LOC114115613|LOC114115613	-0.577549	0.563298	0.159634	1
gene-PVRIG|PVRIG	-0.502943	2.9484	0.159738	1
gene-TNFSF13B|TNFSF13B	-0.48663	3.04229	0.159763	1
gene-P2RY10|P2RY10	-0.409903	2.51548	0.159848	1
gene-CAPN6|CAPN6	0.762701	2.63527	0.159849	1
gene-ASPRV1|ASPRV1	0.739552	-0.481937	0.159972	1
gene-FAM177B|FAM177B	-0.407511	6.53177	0.159995	1
gene-LOC101120626|LOC101120626	0.849823	0.0373933	0.160184	1
gene-ELAVL3|ELAVL3	1.18835	-1.08987	0.160245	1
gene-HAPLN3|HAPLN3	-0.582593	1.43698	0.160336	1
gene-ADGRV1|ADGRV1	0.485999	2.56897	0.160361	1
gene-LOC101112590|LOC101112590	0.253124	4.78861	0.160444	1
gene-TANC2|TANC2	-0.352114	4.88217	0.160515	1
gene-CCL26|CCL26	0.976955	1.46051	0.160553	1
gene-ATMIN|ATMIN	0.245202	5.73419	0.160604	1
gene-LOC114108708|LOC114108708	-0.387066	2.68774	0.160644	1
gene-ECRG4|ECRG4	-0.259849	4.80534	0.160701	1
gene-LOC101114547|LOC101114547	0.222991	5.08775	0.16088	1
gene-TNFRSF21|TNFRSF21	0.257331	6.8418	0.160968	1
gene-SETD7|SETD7	0.277201	4.94537	0.16097	1
gene-LOC121820070|LOC121820070	-1.04418	-1.00801	0.161021	1
gene-PLD2|PLD2	-0.287994	3.8834	0.161049	1
gene-IFI35|IFI35	-0.276826	6.48814	0.161053	1
gene-SLAMF6|SLAMF6	-0.392996	4.62171	0.161113	1
gene-DLD|DLD	0.253198	6.8256	0.161173	1
gene-ZSWIM6|ZSWIM6	-0.238117	5.0057	0.161176	1
gene-MYRF|MYRF	0.277171	8.6726	0.161285	1
gene-GFOD1|GFOD1	-0.296607	4.33633	0.161355	1
gene-RBMS3|RBMS3	-0.36394	2.81405	0.161405	1
gene-TNFRSF8|TNFRSF8	0.684057	0.00163205	0.161623	1
gene-TM7SF2|TM7SF2	0.317805	3.68475	0.16164	1
gene-CEP41|CEP41	-0.24172	4.86275	0.161658	1
gene-POLD4|POLD4	-0.29186	4.81606	0.161781	1
gene-LOC121817997|LOC121817997	-0.328072	4.1467	0.161825	1
gene-SPACA9|SPACA9	0.497111	1.71426	0.161825	1
gene-SLC9A7|SLC9A7	0.23523	5.21419	0.161907	1
gene-ZNF496|ZNF496	-0.237263	5.03592	0.162079	1
gene-VIM|VIM	-0.397795	8.24518	0.162135	1
gene-C9H8orf82|C9H8orf82	0.318394	3.42248	0.162195	1
gene-VNN2|VNN2	-0.72907	3.91358	0.162387	1
gene-LOC101113476|LOC101113476	-0.875154	0.192637	0.162484	1
gene-OGFR|OGFR	-0.284659	5.65589	0.162493	1
gene-DNAJC6|DNAJC6	-0.778104	0.854256	0.162545	1
gene-PHYH|PHYH	0.262597	6.09713	0.162707	1
gene-SORD|SORD	0.364029	6.33507	0.162732	1
gene-LOC101112076|LOC101112076	0.207924	5.72804	0.1628	1
gene-TCP11L1|TCP11L1	-0.264563	5.55722	0.163065	1
gene-TIMP4|TIMP4	0.509214	2.50387	0.16315	1
gene-LOC101116579|LOC101116579	0.299615	6.06789	0.163351	1
gene-IFNG|IFNG	-0.735101	0.904127	0.163404	1
gene-SFMBT2|SFMBT2	-0.271463	4.29526	0.163706	1
gene-LOC105615131|LOC105615131	-0.347591	4.99208	0.163746	1
gene-HADHB|HADHB	0.218472	6.67963	0.163833	1
gene-DERL3|DERL3	0.284348	5.15058	0.163848	1
gene-BCKDHB|BCKDHB	0.260456	4.83759	0.16415	1
gene-HAND2|HAND2	-1.50251	-0.845708	0.16422	1
gene-LOC101106416|LOC101106416	0.31708	4.02675	0.164363	1
gene-FNDC4|FNDC4	-0.640611	0.588775	0.164421	1
gene-FAM20C|FAM20C	0.494589	8.38455	0.164582	1
gene-SMIM33|SMIM33	-0.662295	1.24901	0.16462	1
gene-MPHOSPH6|MPHOSPH6	-0.311779	3.96227	0.164626	1
gene-GK5|GK5	0.321707	6.9152	0.164788	1
gene-ADGRB2|ADGRB2	-0.877977	0.203681	0.164805	1
gene-LOC101116178|LOC101116178	0.594756	2.55485	0.1649	1
gene-CAPSL|CAPSL	-0.93368	-0.284593	0.165041	1
gene-PPP1R18|PPP1R18	-0.266814	4.99651	0.165127	1
gene-LOC121820221|LOC121820221	-0.527734	2.44006	0.165131	1
gene-GPLD1|GPLD1	0.632381	0.939246	0.165136	1
gene-EFS|EFS	-0.59242	1.47415	0.165289	1
gene-LRRIQ1|LRRIQ1	-0.991265	-0.758788	0.165429	1
gene-AQP8|AQP8	-1.63866	-1.1428	0.165599	1
gene-ALG3|ALG3	0.259148	4.36904	0.165819	1
gene-LOC121816875|LOC121816875	-0.521744	5.32928	0.165829	1
gene-ELK1|ELK1	0.233784	5.16515	0.165916	1
gene-MTMR1|MTMR1	0.216245	5.35212	0.166107	1
gene-AREG|AREG	-0.822121	3.5338	0.166132	1
gene-LOC121817496|LOC121817496	0.733954	0.70746	0.166315	1
gene-CRYGS|CRYGS	-0.358263	3.1505	0.166334	1
gene-APBA1|APBA1	-0.391865	2.56041	0.166339	1
gene-LOC101108522|LOC101108522	-0.420095	8.27526	0.166445	1
gene-PMM2|PMM2	0.209373	5.98635	0.166486	1
gene-BTG2|BTG2	0.576331	7.09806	0.166664	1
gene-LOC121818087|LOC121818087	-0.920387	-0.457516	0.166773	1
gene-GDPD3|GDPD3	-0.358339	4.23784	0.166774	1
gene-AMPH|AMPH	-0.776955	0.491613	0.166842	1
gene-FHDC1|FHDC1	-0.227847	6.05188	0.16686	1
gene-PPIF|PPIF	0.249477	4.91589	0.166884	1
gene-IRF1|IRF1	-0.349206	7.81187	0.16691	1
gene-IER3|IER3	0.357345	6.4056	0.167183	1
gene-RPL36|RPL36	-0.254546	6.7018	0.167542	1
gene-VSIR|VSIR	-0.262255	5.59694	0.167592	1
gene-CAVIN1|CAVIN1	-0.243194	6.69245	0.167948	1
gene-LOC121818740|LOC121818740	0.532181	0.896075	0.168023	1
gene-PSD4|PSD4	-0.259477	5.58026	0.168037	1
gene-KEF53_p02|ND6	0.293571	8.93621	0.168079	1
gene-PROB1|PROB1	0.49066	2.25901	0.168223	1
gene-ADGRF3|ADGRF3	-0.795434	0.613782	0.168229	1
gene-TNRC6C|TNRC6C	-0.321923	4.26247	0.168282	1
gene-SH2D6|SH2D6	0.424484	4.99623	0.168313	1
gene-LOC114118065|LOC114118065	-0.397583	2.53637	0.168317	1
gene-LOC106991925|LOC106991925	-0.582159	0.639521	0.168445	1
gene-CLCN4|CLCN4	0.370409	4.45408	0.168555	1
gene-ABHD12B|ABHD12B	-0.45327	1.39287	0.168574	1
gene-FOXL1|FOXL1	-0.393398	2.63762	0.168577	1
gene-LOC114110521|LOC114110521	0.747799	-0.643228	0.168763	1
gene-LOC101115685|LOC101115685	-0.307759	3.61597	0.168846	1
gene-GJB3|GJB3	0.639987	1.77817	0.168902	1
gene-SSBP2|SSBP2	-0.304495	4.63564	0.168936	1
gene-ZMYND15|ZMYND15	-0.533498	1.8281	0.169276	1
gene-CAMK2N1|CAMK2N1	0.279481	4.51857	0.169439	1
gene-LOC114118018|LOC114118018	0.249831	5.89806	0.169455	1
gene-GALNT16|GALNT16	-0.523788	2.77125	0.16953	1
gene-PIWIL3|PIWIL3	-0.549724	1.36037	0.16969	1
gene-SPIB|SPIB	-0.357651	3.95488	0.169748	1
gene-HSD11B1L|HSD11B1L	0.353325	2.9671	0.169813	1
gene-PEX7|PEX7	0.222032	5.34676	0.169913	1
gene-GYPC|GYPC	-0.30704	3.44637	0.17004	1
gene-LOC101113032|LOC101113032	0.345674	4.15922	0.170052	1
gene-RITA1|RITA1	0.290849	3.87604	0.170087	1
gene-LOC114110140|LOC114110140	-0.45668	5.95933	0.170125	1
gene-LOC121816558|LOC121816558	-0.521641	1.421	0.170132	1
gene-LOC114109014|LOC114109014	-0.615456	1.32501	0.170206	1
gene-LOC121819502|LOC121819502	-0.55819	3.447	0.170419	1
gene-KANK4|KANK4	0.406027	7.32398	0.17043	1
gene-LOC105611446|LOC105611446	-0.843568	0.289753	0.170673	1
gene-COMT|COMT	0.225027	7.24758	0.170779	1
gene-SP5|SP5	-0.612015	1.28232	0.170793	1
gene-ALDH1A2|ALDH1A2	-0.301745	4.94716	0.170859	1
gene-CLDN14|CLDN14	1.13052	-0.0990617	0.171136	1
gene-LOC105603045|LOC105603045	0.812459	-0.544545	0.171177	1
gene-LOC101107644|LOC101107644	-0.228354	5.59187	0.171293	1
gene-PYROXD1|PYROXD1	-0.251744	4.49223	0.171309	1
gene-LOC105610540|LOC105610540	1.07047	-0.317718	0.171374	1
gene-C1H3orf85|C1H3orf85	-0.710283	0.161206	0.171498	1
gene-DCBLD1|DCBLD1	0.226264	5.5146	0.171557	1
gene-FGFR2|FGFR2	0.233997	4.97503	0.171568	1
gene-LOC101105367|LOC101105367	-0.466569	6.30727	0.171575	1
gene-CREB3L2|CREB3L2	0.232614	6.76452	0.171624	1
gene-DNASE1L3|DNASE1L3	-0.340848	4.15784	0.171769	1
gene-SLITRK4|SLITRK4	1.27221	2.56741	0.171882	1
gene-CLSPN|CLSPN	-0.301545	4.98058	0.172113	1
gene-ATXN3|ATXN3	-0.237944	5.31598	0.172575	1
gene-DEGS2|DEGS2	0.331001	4.26413	0.172582	1
gene-SHMT1|SHMT1	-0.484831	2.83342	0.172753	1
gene-PYCR3|PYCR3	0.279912	4.16963	0.172785	1
gene-CMBL|CMBL	0.217211	6.13206	0.172988	1
gene-KEF53_p03|ND5	0.283805	10.9824	0.172994	1
gene-ABHD11|ABHD11	-0.399021	3.11533	0.172995	1
gene-IL32|IL32	-1.0241	5.22693	0.173231	1
gene-SUSD1|SUSD1	0.3603	3.49172	0.173235	1
gene-NLRP6|NLRP6	-0.66207	-0.184539	0.173356	1
gene-MRPS31|MRPS31	0.229374	5.0308	0.173466	1
gene-KLHL41|KLHL41	0.664745	0.623658	0.173546	1
gene-PLS1|PLS1	-0.366734	7.87803	0.173667	1
gene-DZIP1|DZIP1	0.467398	5.17173	0.173677	1
gene-NCKAP1L|NCKAP1L	-0.288439	5.2072	0.173793	1
gene-SPRED1|SPRED1	-0.248329	4.87543	0.173994	1
gene-EIF6|EIF6	-0.278014	6.32327	0.174084	1
gene-LOC101113619|LOC101113619	-0.343665	4.68581	0.174198	1
gene-LOC101109746|LOC101109746	-0.5299	6.36787	0.174235	1
gene-TTC4|TTC4	0.220474	5.06187	0.174483	1
gene-CLEC2D|CLEC2D	-0.331361	3.37473	0.174567	1
gene-LOC105608026|LOC105608026	1.18481	-1.08809	0.174589	1
gene-C1H21orf91|C1H21orf91	-0.258856	4.49072	0.174591	1
gene-GCLM|GCLM	-0.285348	5.37861	0.17471	1
gene-LIMD2|LIMD2	-0.251039	4.99782	0.174782	1
gene-CD226|CD226	-0.632237	1.31505	0.174923	1
gene-COG2|COG2	0.213666	5.79122	0.174945	1
gene-ISLR|ISLR	-0.426036	3.42691	0.17499	1
gene-LOC105615270|LOC105615270	0.206975	6.07693	0.175179	1
gene-FGFBP1|FGFBP1	-1.15232	1.84522	0.175233	1
gene-AGPAT5|AGPAT5	-0.254007	4.59294	0.175265	1
gene-MYORG|MYORG	0.244357	4.99504	0.1754	1
gene-EXTL3|EXTL3	0.242396	5.94688	0.175411	1
gene-CABP1|CABP1	-0.700488	0.321166	0.175578	1
gene-FSD1|FSD1	-0.548837	0.851557	0.175676	1
gene-PPIL6|PPIL6	0.500663	1.92985	0.175684	1
gene-MAPK12|MAPK12	-0.239065	6.00979	0.175942	1
gene-LOC101120322|LOC101120322	-0.377812	4.76319	0.176161	1
gene-ILDR2|ILDR2	0.509215	1.61858	0.176246	1
gene-LOC114115685|LOC114115685	0.349799	2.85528	0.176453	1
gene-TOR2A|TOR2A	0.283115	3.88919	0.176528	1
gene-TBX6|TBX6	0.788272	-0.116881	0.176737	1
gene-MKX|MKX	-1.05681	-0.630236	0.17675	1
gene-EPB41L2|EPB41L2	-0.257079	5.73162	0.176759	1
[truncated: 16,798 more rows]

## Sheet: TableS2
Table S2. DESeq2 analysis of differential gene expression from abomasum comparing H. contortus susceptible and resistant Morada Nova sheep. Differentially expressed genes (q-value < 0.1 and |FC| > 1.5) are in bold.
Gene	baseMean	log2FoldChange	lfcSE	stat	pvalue	padj
gene-LOC114116426|LOC114116426	9.95527	6.81034	1.45647	4.67593	2.92626e-06	0.0547621
gene-LOC101116991|LOC101116991	164.829	2.16757	0.480161	4.51426	6.35381e-06	0.0594526
gene-IGSF5|IGSF5	1456.03	-0.545372	0.126009	-4.32803	1.50452e-05	0.093852
gene-IL13|IL13	32.1255	2.11013	0.505792	4.17193	3.0203e-05	0.141305
gene-FMNL3|FMNL3	440.759	-0.525919	0.132252	-3.97663	6.98978e-05	0.218011
gene-THNSL1|THNSL1	182.181	0.567207	0.141653	4.00419	6.22313e-05	0.218011
gene-TOMM20|TOMM20	1520.38	0.19875	0.0516713	3.84643	0.000119852	0.219467
gene-ARHGAP17|ARHGAP17	1257.65	-0.27315	0.0713491	-3.82836	0.000129001	0.219467
gene-ABCB9|ABCB9	168.386	0.638628	0.165219	3.86533	0.000110939	0.219467
gene-LOC101107420|LOC101107420	711.206	3.98213	1.03702	3.83998	0.000123046	0.219467
gene-LOC121819799|LOC121819799	6.25715	-6.04763	1.5569	-3.8844	0.000102581	0.219467
gene-LOC101111396|LOC101111396	341.997	-0.616721	0.165545	-3.72539	0.000195017	0.29412
gene-ARHGEF25|ARHGEF25	309.097	-0.49379	0.132967	-3.71362	0.000204316	0.29412
gene-CS|CS	4231.01	0.317807	0.0869232	3.65618	0.000255999	0.342198
gene-LOC105605770|LOC105605770	1767.09	-1.31731	0.365444	-3.6047	0.000312517	0.344026
gene-PAPSS1|PAPSS1	1461.42	0.498258	0.138007	3.61037	0.000305759	0.344026
gene-LOC121818812|LOC121818812	19.7127	2.70414	0.748209	3.61415	0.000301339	0.344026
gene-HIC1|HIC1	174.32	-0.607234	0.170084	-3.57021	0.000356698	0.370847
gene-KIAA0895|KIAA0895	48.3164	1.65841	0.46957	3.53177	0.000412787	0.406574
gene-TP53INP1|TP53INP1	5557.84	0.749573	0.219756	3.41094	0.000647404	0.447527
gene-LOC101121371|LOC101121371	291.567	-3.14884	0.913228	-3.44804	0.000564679	0.447527
gene-STX6|STX6	763.324	-0.30485	0.0908218	-3.35657	0.000789163	0.447527
gene-AKAP8L|AKAP8L	745.832	-0.317372	0.0943183	-3.36491	0.000765695	0.447527
gene-TSPYL2|TSPYL2	474.523	0.356711	0.105607	3.37773	0.000730871	0.447527
gene-EMILIN2|EMILIN2	408.461	-0.52132	0.154714	-3.36956	0.00075288	0.447527
gene-ODF2L|ODF2L	239.234	0.482749	0.141475	3.41224	0.000644303	0.447527
gene-PTN|PTN	215.8	-1.17782	0.349156	-3.37332	0.000742664	0.447527
gene-LOC121816030|LOC121816030	50.8698	-1.98382	0.580984	-3.41459	0.000638791	0.447527
gene-RGS6|RGS6	60.1965	-0.931135	0.273438	-3.40529	0.00066093	0.447527
gene-INTU|INTU	84.0883	0.837844	0.248278	3.37462	0.000739183	0.447527
gene-LOC101119588|LOC101119588	17.6384	-1.28517	0.377234	-3.40682	0.000657242	0.447527
gene-LOC121818163|LOC121818163	66.5013	1.83185	0.527067	3.47555	0.00050981	0.447527
gene-C2CD4D|C2CD4D	5.58192	2.43567	0.718054	3.39204	0.000693744	0.447527
gene-NAA35|NAA35	923.518	0.244334	0.0737413	3.31339	0.000921714	0.471617
gene-LOC101117021|LOC101117021	47.5068	-1.03384	0.312194	-3.31153	0.000927873	0.471617
gene-LOC101107436|LOC101107436	51.6631	-1.0485	0.316754	-3.31015	0.000932448	0.471617
gene-TMEM72|TMEM72	22.2748	1.2591	0.377877	3.33203	0.000862157	0.471617
gene-LOC114118882|LOC114118882	3821.63	0.860013	0.260968	3.29548	0.000982542	0.483876
gene-ALPL|ALPL	5876.73	0.998755	0.308822	3.23408	0.00122037	0.485914
gene-RCAN1|RCAN1	1497.53	0.998686	0.305417	3.26991	0.00107582	0.485914
gene-TCAF2|TCAF2	1561.63	1.25864	0.384829	3.27066	0.00107296	0.485914
gene-WDR83OS|WDR83OS	703.845	-0.259297	0.0801755	-3.23412	0.00122016	0.485914
gene-FAM149A|FAM149A	1073.23	0.577142	0.176854	3.26339	0.00110088	0.485914
gene-ZNF19|ZNF19	189.769	0.496778	0.153139	3.24398	0.00117873	0.485914
gene-LOC101107809|LOC101107809	349.033	1.65631	0.509359	3.25177	0.00114691	0.485914
gene-SLC12A8|SLC12A8	210.012	0.566503	0.174853	3.23989	0.00119578	0.485914
gene-LOC101106720|LOC101106720	187.168	1.57294	0.47949	3.28044	0.00103646	0.485914
gene-RNF43|RNF43	776.655	0.235321	0.0729662	3.22506	0.00125946	0.49103
gene-LOC121816881|LOC121816881	1375.96	0.805225	0.250515	3.21427	0.00130775	0.496293
gene-LOC121818086|LOC121818086	7.65953	-3.63615	1.13265	-3.21029	0.00132599	0.496293
gene-PRMT2|PRMT2	287.979	-0.351178	0.109607	-3.20398	0.00135543	0.497364
gene-NUMBL|NUMBL	84.5706	-0.693119	0.216859	-3.19618	0.00139262	0.501182
gene-CYP2C18|CYP2C18	98.768	0.969207	0.304586	3.18204	0.0014624	0.506801
gene-CLEC4F|CLEC4F	14.7053	-2.01891	0.633792	-3.18544	0.00144533	0.506801
gene-LOC105605766|LOC105605766	2802.68	-1.06824	0.344616	-3.09978	0.00193662	0.552612
gene-LOC121817120|LOC121817120	428.837	-0.713607	0.228185	-3.12733	0.00176404	0.552612
gene-AXL|AXL	526.889	-0.563369	0.179375	-3.14073	0.00168527	0.552612
gene-FHIP1A|FHIP1A	523.437	0.350714	0.113058	3.10208	0.00192168	0.552612
gene-CD79A|CD79A	282.37	-0.432019	0.139394	-3.09926	0.00194005	0.552612
gene-LOC121818997|LOC121818997	89.5913	-0.829036	0.266528	-3.11051	0.00186767	0.552612
gene-ZNF831|ZNF831	82.2757	-0.89316	0.287098	-3.11099	0.00186462	0.552612
gene-SPOCK1|SPOCK1	89.463	-0.53482	0.172259	-3.10475	0.00190442	0.552612
gene-LOC114112500|LOC114112500	54.3215	-1.4407	0.46106	-3.12476	0.00177948	0.552612
gene-SELP|SELP	87.0534	0.890772	0.286705	3.10693	0.0018904	0.552612
gene-LOC105608356|LOC105608356	35.1594	-0.813742	0.261357	-3.11352	0.00184869	0.552612
gene-TPSB2|TPSB2	32.101	1.99313	0.643379	3.09791	0.00194894	0.552612
gene-SLITRK6|SLITRK6	59.1293	-1.23194	0.398939	-3.08804	0.00201481	0.555867
gene-CLDN7|CLDN7	80.2144	-2.35478	0.762731	-3.0873	0.00201982	0.555867
gene-NOX5|NOX5	470.716	0.957679	0.312329	3.06625	0.00216761	0.581285
gene-DCDC2|DCDC2	19.3811	1.48782	0.485369	3.06533	0.00217431	0.581285
gene-DUOX1|DUOX1	67.3075	1.48009	0.48595	3.04576	0.00232092	0.611743
gene-MCTP1|MCTP1	213.549	0.701371	0.230828	3.0385	0.00237757	0.61797
gene-BZW2|BZW2	2406.73	0.400996	0.133509	3.00352	0.00266877	0.684157
gene-LOC101115905|LOC101115905	1756.84	-0.426603	0.142549	-2.99268	0.0027654	0.697984
gene-LOC105604766|LOC105604766	7.69706	1.72111	0.57578	2.98918	0.00279731	0.697984
gene-IGF2|IGF2	851.511	-0.42878	0.144723	-2.96276	0.00304897	0.750769
gene-STAT1|STAT1	5492.33	-0.511287	0.175036	-2.92104	0.00348865	0.752405
gene-AMOT|AMOT	3066.23	0.309121	0.106059	2.91462	0.00356122	0.752405
gene-MTUS1|MTUS1	3312.43	0.286519	0.0984189	2.91121	0.00360027	0.752405
gene-IRF9|IRF9	2207.16	-0.379239	0.129237	-2.93445	0.00334143	0.752405
gene-RCC2|RCC2	1653.64	-0.201102	0.0695378	-2.89198	0.00382821	0.752405
gene-LOC114109518|LOC114109518	336.375	-1.05425	0.361022	-2.92017	0.00349838	0.752405
gene-LOC105605863|LOC105605863	298.484	-0.902822	0.312761	-2.88662	0.00389401	0.752405
gene-FITM2|FITM2	535.177	0.425353	0.146666	2.90015	0.00372979	0.752405
gene-LOC101121216|LOC101121216	377.341	0.539734	0.183566	2.94026	0.00327933	0.752405
gene-LOC121816514|LOC121816514	673.145	1.25099	0.428159	2.92178	0.00348041	0.752405
gene-WDFY2|WDFY2	447.861	0.300483	0.101688	2.95496	0.00312708	0.752405
gene-LOC101109915|LOC101109915	258.674	-1.70173	0.589622	-2.88614	0.00389993	0.752405
gene-CD7|CD7	104.42	-1.20875	0.418384	-2.88909	0.00386355	0.752405
gene-CD274|CD274	94.7152	-0.982364	0.340189	-2.8877	0.00388073	0.752405
gene-NKAIN1|NKAIN1	128.218	0.999696	0.34337	2.91143	0.00359782	0.752405
gene-PAMR1|PAMR1	67.9357	-0.921515	0.318834	-2.89026	0.0038492	0.752405
gene-AHRR|AHRR	57.2651	-0.92225	0.312708	-2.94923	0.00318565	0.752405
gene-HCRTR1|HCRTR1	36.4865	-0.818503	0.282229	-2.90014	0.00372994	0.752405
gene-LOC114111465|LOC114111465	25.7992	-0.871506	0.301341	-2.89209	0.00382686	0.752405
gene-LOC121819086|LOC121819086	8.09949	2.24405	0.76389	2.93766	0.00330695	0.752405
gene-LOC101106468|LOC101106468	5.57984	-5.88597	1.99985	-2.9432	0.00324834	0.752405
gene-CLCA2|CLCA2	18.1758	3.15798	1.09586	2.88172	0.00395506	0.755254
gene-TRPS1|TRPS1	248.529	-0.459292	0.15971	-2.87579	0.00403016	0.761823
gene-ST3GAL1|ST3GAL1	2181.9	0.901879	0.316573	2.84888	0.0043873	0.821039
gene-FABP5|FABP5	2807.24	-0.482795	0.17019	-2.83679	0.00455695	0.824785
gene-TSEN2|TSEN2	647.042	-0.37159	0.131075	-2.83493	0.00458361	0.824785
gene-CARD11|CARD11	646.351	-0.373014	0.131273	-2.84151	0.00449006	0.824785
gene-CYGB|CYGB	97.725	-0.536468	0.189174	-2.83584	0.00457052	0.824785
gene-FZD10|FZD10	20.9436	-1.72082	0.608106	-2.82981	0.00465762	0.830121
gene-ZNF23|ZNF23	325.979	-0.482628	0.171612	-2.81233	0.00491848	0.84573
gene-TPPP3|TPPP3	186.276	-1.46068	0.51855	-2.81685	0.00484974	0.84573
gene-SCN2A|SCN2A	38.7279	-1.09916	0.391143	-2.81014	0.00495207	0.84573
gene-LOC121816554|LOC121816554	14.9371	-2.57125	0.915396	-2.8089	0.00497116	0.84573
gene-LOC114114527|LOC114114527	7.72117	-1.93532	0.687276	-2.81592	0.00486372	0.84573
gene-PPA2|PPA2	610.239	0.243584	0.0869828	2.80037	0.00510441	0.852891
gene-LOC121819404|LOC121819404	8.26265	1.84597	0.658672	2.80257	0.0050697	0.852891
gene-CFD|CFD	567.04	-0.649192	0.232165	-2.79625	0.00516996	0.856201
gene-XBP1|XBP1	10002.7	0.365311	0.131954	2.76848	0.00563185	0.857217
gene-DNASE1L1|DNASE1L1	1370.99	0.300658	0.108473	2.77174	0.00557574	0.857217
gene-SOX9|SOX9	953.992	0.268412	0.0969575	2.76835	0.00563416	0.857217
gene-LOC101123533|LOC101123533	324.795	-1.05536	0.379222	-2.78297	0.00538646	0.857217
gene-LOC114111046|LOC114111046	344.624	0.627045	0.226283	2.77107	0.00558718	0.857217
gene-PTPMT1|PTPMT1	283.893	0.259604	0.0930756	2.78917	0.00528425	0.857217
gene-LAYN|LAYN	192.632	-0.496393	0.178123	-2.78681	0.00532303	0.857217
gene-CCL21|CCL21	262.637	-0.772759	0.278896	-2.77078	0.00559222	0.857217
gene-LOC114111438|LOC114111438	66.4436	-1.06363	0.381342	-2.78916	0.00528446	0.857217
gene-HES6|HES6	153.303	1.4881	0.535115	2.78089	0.00542098	0.857217
gene-CFTR|CFTR	1651.89	1.21009	0.438301	2.76087	0.00576472	0.859735
gene-EPSTI1|EPSTI1	459.827	-1.30277	0.472048	-2.75983	0.00578323	0.859735
gene-C14H19orf54|C14H19orf54	384.089	0.559434	0.202728	2.75953	0.00578854	0.859735
gene-CCDC85B|CCDC85B	30.6292	-8.34092	3.02728	-2.75526	0.00586462	0.864177
gene-EHF|EHF	3805.5	0.307099	0.112062	2.74043	0.0061358	0.878007
gene-EBNA1BP2|EBNA1BP2	788.05	-0.183238	0.0668318	-2.74179	0.00611062	0.878007
gene-NCALD|NCALD	215.664	-0.434703	0.158864	-2.73632	0.00621305	0.878007
gene-B3GNT3|B3GNT3	244.28	-1.14818	0.419599	-2.73637	0.00621218	0.878007
gene-LOC105611518|LOC105611518	52.7556	0.597218	0.21837	2.7349	0.00623998	0.878007
gene-RIIAD1|RIIAD1	18.2994	1.12379	0.409077	2.74713	0.00601187	0.878007
gene-DEPTOR|DEPTOR	729.562	0.509716	0.186953	2.72643	0.00640227	0.881349
gene-SGCD|SGCD	85.7899	-0.839891	0.307594	-2.73052	0.00632343	0.881349
gene-NUDT13|NUDT13	164.479	0.866297	0.317756	2.72629	0.00640502	0.881349
gene-ABCA3|ABCA3	3152.48	0.223608	0.0823252	2.71616	0.00660447	0.902161
gene-TFF3|TFF3	16097	2.23453	0.850275	2.62801	0.00858852	0.910416
gene-MYO10|MYO10	2705.62	0.170097	0.0645032	2.63702	0.00836367	0.910416
gene-LOC106991529|LOC106991529	1741.02	-0.55771	0.21227	-2.62736	0.00860495	0.910416
gene-LTBP4|LTBP4	2486.76	-0.653549	0.243523	-2.68372	0.00728076	0.910416
gene-TAF1D|TAF1D	1483.67	0.203086	0.0769262	2.64001	0.00829032	0.910416
gene-ME2|ME2	1221.29	0.418845	0.155442	2.69455	0.00704842	0.910416
gene-TMEM176B|TMEM176B	1100.45	-0.300054	0.111822	-2.68332	0.00728947	0.910416
gene-KBTBD11|KBTBD11	1048.16	0.661471	0.248833	2.65829	0.00785378	0.910416
gene-AXIN2|AXIN2	796.813	-0.52842	0.199672	-2.64644	0.0081345	0.910416
gene-MFSD9|MFSD9	808.364	-0.405539	0.153916	-2.63481	0.00841834	0.910416
gene-MRPL53|MRPL53	697.45	0.222452	0.0838927	2.65163	0.00801049	0.910416
gene-RTP4|RTP4	540.186	-0.818375	0.311509	-2.62713	0.00861086	0.910416
gene-LOC101120875|LOC101120875	535.889	-0.893909	0.336752	-2.6545	0.00794252	0.910416
gene-LOC101108669|LOC101108669	713.637	-0.874238	0.328788	-2.65897	0.00783789	0.910416
gene-ALOX12|ALOX12	549.347	0.611132	0.228003	2.68037	0.00735407	0.910416
gene-PDHX|PDHX	533.578	0.299882	0.112095	2.67525	0.00746731	0.910416
gene-SOCS3|SOCS3	429.289	0.603061	0.227022	2.6564	0.00789795	0.910416
gene-ARHGAP33|ARHGAP33	246.313	-0.40287	0.152524	-2.64136	0.0082575	0.910416
gene-HERC5|HERC5	217.317	-0.880861	0.332257	-2.65114	0.00802201	0.910416
gene-IFT140|IFT140	225.908	0.337483	0.124967	2.70058	0.00692187	0.910416
gene-LOC121820478|LOC121820478	117.981	-0.656543	0.248941	-2.63735	0.00835576	0.910416
gene-HSPA12A|HSPA12A	126.242	-0.372245	0.13974	-2.66385	0.0077252	0.910416
gene-SFTPD|SFTPD	187.934	1.57622	0.589229	2.67506	0.00747167	0.910416
gene-GPR34|GPR34	79.0986	-0.729215	0.270952	-2.69131	0.00711727	0.910416
gene-LOC101111631|LOC101111631	84.946	-0.882932	0.333964	-2.64379	0.00819829	0.910416
gene-LOC101114456|LOC101114456	213.987	1.52855	0.581329	2.6294	0.00855356	0.910416
gene-TLL2|TLL2	49.3488	1.00965	0.377696	2.67318	0.0075136	0.910416
gene-TNFRSF18|TNFRSF18	93.8342	0.58077	0.220076	2.63895	0.00831638	0.910416
gene-HCN3|HCN3	42.0132	-0.991356	0.372958	-2.65809	0.00785846	0.910416
gene-LOC121816967|LOC121816967	104.422	-1.98651	0.74354	-2.6717	0.0075469	0.910416
gene-KCNK16|KCNK16	48.4368	-0.644922	0.243888	-2.64434	0.0081851	0.910416
gene-LOC443162|LOC443162	196.382	1.34584	0.497243	2.7066	0.00679766	0.910416
gene-TBX1|TBX1	22.253	-1.07781	0.408356	-2.6394	0.00830534	0.910416
gene-ITGBL1|ITGBL1	17.8974	-1.67628	0.630999	-2.65655	0.00789442	0.910416
gene-CASR|CASR	25.7276	-1.5255	0.573777	-2.6587	0.00784421	0.910416
gene-LOC105605720|LOC105605720	12.2682	-1.25273	0.476225	-2.63054	0.00852485	0.910416
gene-ASTN2|ASTN2	15.9068	-1.89686	0.710216	-2.67082	0.00756659	0.910416
gene-FFAR2|FFAR2	16.651	1.11072	0.41503	2.67625	0.00744521	0.910416
gene-LOC121816974|LOC121816974	22.6625	1.13731	0.423181	2.68753	0.00719827	0.910416
gene-LOC114118683|LOC114118683	11.3568	-1.8764	0.700983	-2.67682	0.00743255	0.910416
gene-WDR7|WDR7	597.194	0.258893	0.0989475	2.61647	0.00888448	0.92369
gene-MCP1|MCP1	215.201	1.39483	0.532689	2.61848	0.0088323	0.92369
gene-SLC24A2|SLC24A2	34.0304	-1.37524	0.525466	-2.61719	0.00886579	0.92369
gene-SLC4A4|SLC4A4	320.273	0.707218	0.271891	2.60111	0.00929221	0.946566
gene-TMEM150C|TMEM150C	189.352	-0.509551	0.195869	-2.60149	0.00928211	0.946566
gene-FCER1A|FCER1A	20.1827	2.02673	0.779339	2.60057	0.00930684	0.946566
gene-TRPC5|TRPC5	23.7134	0.951637	0.365906	2.60077	0.00930157	0.946566
gene-UBE2V1|UBE2V1	954.496	0.185524	0.071415	2.59782	0.00938173	0.949026
gene-TAF2|TAF2	1181.86	0.195261	0.0752269	2.59562	0.00944201	0.949988
gene-HSPB8|HSPB8	219.124	-0.765685	0.295454	-2.59155	0.00955448	0.956163
gene-C2H9orf64|C2H9orf64	320.6	-0.471104	0.182235	-2.58515	0.00973371	0.956373
gene-LOC101117763|LOC101117763	152.143	-0.626869	0.242563	-2.58436	0.009756	0.956373
gene-GSPT2|GSPT2	59.3146	-0.737708	0.28547	-2.58418	0.009761	0.956373
gene-LOC101104728|LOC101104728	20.2359	7.83551	3.02794	2.58774	0.00966087	0.956373
gene-AFMID|AFMID	180.069	-0.903234	0.350681	-2.57566	0.010005	0.961281
gene-CAPN14|CAPN14	65.0576	1.38665	0.538244	2.57625	0.00998783	0.961281
gene-LOC101115949|LOC101115949	24.6793	-1.41379	0.548889	-2.57574	0.0100027	0.961281
gene-SLURP1|SLURP1	34.1353	-2.35251	0.913503	-2.57526	0.0100166	0.961281
gene-HTATIP2|HTATIP2	439.475	0.442789	0.172292	2.57	0.01017	0.971026
gene-LOC121816515|LOC121816515	7271.67	1.38387	0.540845	2.55872	0.0105059	0.975954
gene-FAM174B|FAM174B	2396.69	0.52544	0.204973	2.56345	0.0103636	0.975954
gene-GTPBP4|GTPBP4	1244.96	0.30723	0.119891	2.56258	0.0103897	0.975954
gene-ITPRIPL1|ITPRIPL1	392.214	-0.360375	0.140989	-2.55605	0.0105867	0.975954
gene-LOC101112109|LOC101112109	294.13	-0.294293	0.114959	-2.55998	0.0104678	0.975954
gene-BICC1|BICC1	140.193	-0.344221	0.134579	-2.55775	0.010535	0.975954
gene-LOC101103396|LOC101103396	119.886	-1.81562	0.708569	-2.56237	0.010396	0.975954
gene-LOC101108803|LOC101108803	540.408	-0.475858	0.187319	-2.54036	0.011074	0.977541
gene-NAGK|NAGK	426.84	-0.310732	0.121778	-2.55163	0.0107221	0.977541
gene-SYNGAP1|SYNGAP1	323.262	-0.331155	0.130319	-2.54112	0.01105	0.977541
gene-LOC106990106|LOC106990106	346.172	-0.390137	0.153189	-2.54677	0.0108725	0.977541
gene-PRTFDC1|PRTFDC1	185.949	0.567769	0.223385	2.54166	0.0110326	0.977541
gene-LOC101119765|LOC101119765	156.701	0.30857	0.121126	2.54751	0.0108496	0.977541
gene-FCER2|FCER2	152.587	1.03028	0.404337	2.54807	0.0108321	0.977541
gene-CBLN4|CBLN4	9.56183	2.79228	1.09792	2.54324	0.0109828	0.977541
gene-LOC121818066|LOC121818066	8.67485	-6.52029	2.56315	-2.54386	0.0109637	0.977541
gene-GCNT1|GCNT1	3375.37	0.587392	0.231801	2.53403	0.0112758	0.98071
gene-THAP12|THAP12	972.868	0.212682	0.0840289	2.53106	0.0113719	0.98071
gene-DPYSL3|DPYSL3	674.884	-0.517057	0.204145	-2.53279	0.0113158	0.98071
gene-BCL2L15|BCL2L15	269.608	-0.752357	0.297231	-2.53122	0.0113666	0.98071
gene-UNC5B|UNC5B	440.267	-0.771034	0.304266	-2.53408	0.0112743	0.98071
gene-SFXN5|SFXN5	501.509	0.329774	0.130411	2.52873	0.0114475	0.982702
gene-LOC101111303|LOC101111303	12.6364	1.18024	0.467548	2.52432	0.0115923	0.990585
gene-PLN|PLN	259.608	-0.684263	0.271459	-2.52069	0.0117126	0.991809
gene-CD40|CD40	92.8189	-0.62534	0.247954	-2.522	0.011669	0.991809
gene-GLI3|GLI3	138.727	-0.502446	0.199459	-2.51904	0.0117675	0.99197
gene-ATP1A1|ATP1A1	12373.1	0.44394	0.176912	2.50938	0.0120942	0.993259
gene-HUWE1|HUWE1	7738.21	0.233289	0.0929188	2.51068	0.01205	0.993259
gene-PDHB|PDHB	1839.72	0.225766	0.0900276	2.50774	0.0121505	0.993259
gene-MANBA|MANBA	370.488	0.653833	0.25977	2.51696	0.0118371	0.993259
gene-DSCC1|DSCC1	271.625	0.380935	0.151642	2.51207	0.0120027	0.993259
gene-LOC101117129|LOC101117129	75.6261	1.52155	0.605439	2.51313	0.0119664	0.993259
gene-TH|TH	62.948	1.35487	0.540298	2.50763	0.0121543	0.993259
gene-ZMYND8|ZMYND8	1283.2	0.242418	0.0969387	2.50073	0.0123937	0.998383
gene-LOC121816399|LOC121816399	652.915	0.181593	0.0727346	2.49665	0.0125371	0.998383
gene-LOC101112843|LOC101112843	380.149	-0.795404	0.318275	-2.49911	0.0124506	0.998383
gene-ZDHHC2|ZDHHC2	125.368	-0.503653	0.201559	-2.49878	0.0124622	0.998383
gene-TPPP2|TPPP2	101.276	0.432547	0.172945	2.50106	0.0123821	0.998383
gene-LOC101108756|LOC101108756	53.0893	-1.1545	0.462362	-2.49696	0.0125263	0.998383
gene-LOC121819866|LOC121819866	97922.6	0.214198	0.164953	1.29854	0.194101	0.999972
gene-EEF1A1|EEF1A1	82976.5	-0.0015127	0.0922665	-0.0163949	0.986919	0.999972
gene-LOC101113211|LOC101113211	33694	-0.246384	0.53853	-0.457513	0.647302	0.999972
gene-KEF53_p01|CYTB	84315.7	0.248448	0.114671	2.16663	0.0302633	0.999972
gene-MUC5AC|MUC5AC	64298.9	-0.699443	0.626109	-1.11713	0.26394	0.999972
gene-LOC114108604|LOC114108604	47583.5	-0.354752	0.24733	-1.43433	0.151479	0.999972
gene-KEF53_p12|ND2	66669.3	0.213859	0.160557	1.33198	0.182866	0.999972
gene-ATP4A|ATP4A	64327.1	0.128578	1.01943	0.126128	0.899631	0.999972
gene-GKN1|GKN1	61204	-0.973994	0.610461	-1.5955	0.1106	0.999972
gene-ATP4B|ATP4B	65962.3	0.0169049	1.07984	0.0156549	0.98751	0.999972
gene-B2M|B2M	39210.8	-0.342388	0.244509	-1.40031	0.161421	0.999972
gene-ACTG1|ACTG1	45362.4	-0.0449981	0.124166	-0.362403	0.717051	0.999972
gene-LOC106990182|LOC106990182	93923.2	0.124972	0.86774	0.14402	0.885485	0.999972
gene-KEF53_p13|ND1	46365.7	0.158339	0.177491	0.892098	0.37234	0.999972
gene-JCHAIN|JCHAIN	39965.3	0.20273	0.224417	0.903365	0.366332	0.999972
gene-KRT8|KRT8	41421.7	-0.148413	0.191339	-0.775654	0.437953	0.999972
gene-TPT1|TPT1	41814.5	-0.0618216	0.128771	-0.480089	0.631164	0.999972
gene-TMSB10|TMSB10	27828	-0.176404	0.187269	-0.941982	0.346202	0.999972
gene-OVAR|OVAR	23170.3	-0.638849	0.556534	-1.14791	0.251007	0.999972
gene-LOC101118213|LOC101118213	30565.5	0.726647	0.490315	1.482	0.13834	0.999972
gene-CD24|CD24	33754.2	-0.117404	0.145516	-0.806812	0.419775	0.999972
gene-GKN2|GKN2	38977.3	-1.27616	0.696925	-1.83113	0.0670805	0.999972
gene-TFF1|TFF1	41414.5	-0.979889	0.498019	-1.96757	0.049117	0.999972
gene-SRRM2|SRRM2	32120.6	0.0692853	0.0917666	0.755017	0.450239	0.999972
gene-CA2|CA2	24281.1	0.387978	0.387616	1.00093	0.316859	0.999972
gene-LOC101108781|LOC101108781	35890	-0.0905064	0.281122	-0.321947	0.747493	0.999972
gene-CLDN18|CLDN18	26783.5	0.0272257	0.103519	0.263003	0.792548	0.999972
gene-CD74|CD74	14120.3	-0.521718	0.374529	-1.393	0.163621	0.999972
gene-CYM|CYM	27396.5	-0.263732	1.04119	-0.253298	0.800038	0.999972
gene-ACTB|ACTB	23761.1	-0.0792907	0.120261	-0.659324	0.509688	0.999972
gene-KEF53_p03|ND5	30651.3	0.282842	0.197233	1.43405	0.151559	0.999972
gene-RPLP0|RPLP0	23910.1	0.0319718	0.087687	0.364613	0.7154	0.999972
gene-RPS2|RPS2	26568.7	-0.0374553	0.0946813	-0.395593	0.692405	0.999972
gene-KEF53_p09|ATP8	24707.7	0.141467	0.112566	1.25674	0.208848	0.999972
gene-RPSA|RPSA	24384.9	0.0567881	0.107555	0.527991	0.597506	0.999972
gene-EEF2|EEF2	24392.4	0.0746864	0.0723648	1.03208	0.302034	0.999972
gene-TSPAN1|TSPAN1	22005.1	-0.137985	0.141741	-0.973507	0.330301	0.999972
gene-RACK1|RACK1	22393.4	-0.042378	0.0867861	-0.488303	0.625335	0.999972
gene-LOC101106871|LOC101106871	14442.4	-0.0762386	0.211463	-0.36053	0.718451	0.999972
gene-RPL4|RPL4	23234.9	-0.0314402	0.0644173	-0.48807	0.6255	0.999972
gene-PSAP|PSAP	18120.5	0.0424782	0.132844	0.319759	0.749151	0.999972
gene-RPS8|RPS8	20666.4	-0.0625144	0.0959578	-0.651478	0.514738	0.999972
gene-MUCL3|MUCL3	34893.2	-1.07101	0.621297	-1.72383	0.0847389	0.999972
gene-LOC105601979|LOC105601979	20103.4	-0.00706456	0.0919634	-0.0768192	0.938767	0.999972
gene-AHNAK|AHNAK	22465.6	-0.0892027	0.198672	-0.448995	0.653436	0.999972
gene-RPLP1|RPLP1	21492.9	0.0075656	0.113342	0.0667501	0.946781	0.999972
gene-MUC6|MUC6	27567.1	0.916774	0.629678	1.45594	0.145409	0.999972
gene-CPD|CPD	15634.2	0.0344688	0.157956	0.218217	0.82726	0.999972
gene-UBC|UBC	16746.4	0.0250358	0.103291	0.24238	0.808486	0.999972
gene-KEF53_p05|ND4L	19396.2	0.269664	0.130944	2.05938	0.0394577	0.999972
gene-RPL3|RPL3	20487.8	0.0453572	0.102943	0.440604	0.6595	0.999972
gene-RPS11|RPS11	17388	-0.0336662	0.0969419	-0.347282	0.728379	0.999972
gene-KEF53_p06|ND3	17011.6	0.111811	0.166245	0.672566	0.501224	0.999972
gene-TAGLN2|TAGLN2	15641	-0.11373	0.127741	-0.890317	0.373296	0.999972
gene-LOC101112291|LOC101112291	10578	-1.04191	1.7881	-0.582687	0.560104	0.999972
gene-GLUL|GLUL	17226.5	0.165111	0.26924	0.613246	0.539714	0.999972
gene-ATP5F1B|ATP5F1B	17025.1	0.152475	0.119668	1.27415	0.20261	0.999972
gene-ATP5F1A|ATP5F1A	15950.9	0.133867	0.116426	1.1498	0.250224	0.999972
gene-DDX17|DDX17	16525	-0.0283785	0.0538442	-0.527049	0.598159	0.999972
gene-PA2G4|PA2G4	15986.1	0.064143	0.117567	0.545587	0.58535	0.999972
gene-P4HB|P4HB	17877.8	0.0417878	0.117695	0.355051	0.722551	0.999972
gene-HSP90B1|HSP90B1	16932.5	0.00351565	0.168758	0.0208324	0.983379	0.999972
gene-HNRNPA2B1|HNRNPA2B1	16343.8	-0.071087	0.0883908	-0.804235	0.421261	0.999972
gene-PDIA3|PDIA3	14145.9	-0.110252	0.121191	-0.909739	0.36296	0.999972
gene-UBB|UBB	14386.1	-0.0970428	0.0804898	-1.20565	0.227951	0.999972
gene-LOC114109090|LOC114109090	13537.2	0.336309	0.269963	1.24576	0.212853	0.999972
gene-FTH1|FTH1	16675.6	0.0662575	0.117112	0.565763	0.571555	0.999972
gene-LOC114112489|LOC114112489	13052.8	0.0892697	0.19992	0.446526	0.655217	0.999972
gene-RPL13A|RPL13A	14827.2	-0.0555021	0.111806	-0.496415	0.619602	0.999972
gene-LOC121817058|LOC121817058	9889.77	0.199428	0.252727	0.789106	0.43005	0.999972
gene-AGR2|AGR2	26599.3	-0.524392	0.610997	-0.858255	0.390752	0.999972
gene-RPL7A|RPL7A	15465.1	0.0284039	0.10434	0.272224	0.78545	0.999972
gene-WARS1|WARS1	5219.4	-0.687598	0.395	-1.74076	0.0817262	0.999972
gene-LOC101108131|LOC101108131	11867.4	0.00715417	0.362404	0.0197409	0.98425	0.999972
gene-CBLIF|CBLIF	17149.4	0.0304379	0.235913	0.129021	0.897341	0.999972
gene-CFB|CFB	9857.13	0.119792	0.193337	0.619601	0.535521	0.999972
gene-APLP2|APLP2	13345	0.0417592	0.104589	0.399269	0.689695	0.999972
gene-LOC105616742|LOC105616742	15796.3	0.169911	0.0893344	1.90196	0.0571758	0.999972
gene-OLFM4|OLFM4	13540.6	-1.98407	0.858702	-2.31055	0.0208577	0.999972
gene-LOC101107171|LOC101107171	6960.44	0.119269	0.655728	0.181889	0.85567	0.999972
gene-MYH9|MYH9	12573.1	0.030125	0.0916782	0.328595	0.742462	0.999972
gene-GHRL|GHRL	22979.2	0.419998	0.827676	0.507442	0.611845	0.999972
gene-EIF4G2|EIF4G2	12988.7	0.0318093	0.0692201	0.459539	0.645847	0.999972
gene-LOC101110577|LOC101110577	7190.48	-0.280287	0.491169	-0.570653	0.568235	0.999972
gene-LOC121818848|LOC121818848	11382.5	0.0868913	0.199116	0.436385	0.662557	0.999972
gene-CALR|CALR	12877.8	-0.0690912	0.141091	-0.489691	0.624352	0.999972
gene-ANXA10|ANXA10	11369.5	-0.0736678	0.09599	-0.767452	0.442813	0.999972
gene-TMSB4X|TMSB4X	10555.9	-0.146573	0.132711	-1.10445	0.269397	0.999972
gene-RPL19|RPL19	12853.2	-0.0252643	0.0884592	-0.285604	0.775181	0.999972
gene-KNG1|KNG1	5744.3	-0.0648503	0.614759	-0.105489	0.915988	0.999972
gene-RRBP1|RRBP1	13573.4	-0.0243129	0.125409	-0.193869	0.846278	0.999972
gene-LOC114112490|LOC114112490	12426.4	0.0206352	0.179254	0.115117	0.908352	0.999972
gene-ATP1B1|ATP1B1	13326.9	0.24612	0.250707	0.981705	0.326245	0.999972
gene-LOC101113217|LOC101113217	12069.3	-0.0625551	0.280124	-0.223312	0.823293	0.999972
gene-LOC101120236|LOC101120236	12783.8	-0.0174804	0.0920339	-0.189934	0.849361	0.999972
gene-RPL27A|RPL27A	12854.2	0.0196129	0.119571	0.164028	0.869709	0.999972
gene-CA9|CA9	9561.34	-0.0808807	0.377544	-0.214229	0.830369	0.999972
gene-KRT19|KRT19	16640.8	-0.0288283	0.227388	-0.12678	0.899114	0.999972
gene-TMBIM6|TMBIM6	11292.1	-0.061053	0.0789205	-0.773602	0.439166	0.999972
gene-LOC121818849|LOC121818849	11876.5	0.0104704	0.179974	0.0581772	0.953607	0.999972
gene-QSOX1|QSOX1	14872.8	0.191774	0.337733	0.567827	0.570152	0.999972
gene-RPS18|RPS18	13014.5	0.0312123	0.110826	0.281632	0.778225	0.999972
gene-LOC100135455|LOC100135455	12216.8	0.173294	0.138062	1.25519	0.209411	0.999972
gene-DDX5|DDX5	11976.2	0.0139803	0.083725	0.166979	0.867386	0.999972
gene-LOC101110773|LOC101110773	11918.4	-0.0121783	0.0966654	-0.125984	0.899744	0.999972
gene-HSPA8|HSPA8	15930.4	-0.214762	0.250385	-0.857727	0.391043	0.999972
gene-RPL5|RPL5	12231.3	-0.0399451	0.0819723	-0.487299	0.626046	0.999972
gene-RPL10|RPL10	11667.7	0.0178665	0.101424	0.176156	0.860171	0.999972
gene-RPL8|RPL8	12523.4	0.0169594	0.082309	0.206046	0.836755	0.999972
gene-CAPN8|CAPN8	8776.59	-0.418594	0.211325	-1.9808	0.0476132	0.999972
gene-SPTBN1|SPTBN1	10123.3	0.0266405	0.106976	0.249033	0.803336	0.999972
gene-RPS24|RPS24	12034.5	-0.0802386	0.114853	-0.698617	0.484791	0.999972
gene-HNRNPH1|HNRNPH1	11541.3	0.0229839	0.0679045	0.338474	0.735006	0.999972
gene-EEF1G|EEF1G	11915.7	0.0471207	0.0994541	0.473794	0.635647	0.999972
gene-RPL12|RPL12	10939.1	-0.0259662	0.108162	-0.240069	0.810277	0.999972
gene-UBA52|UBA52	10201.3	-0.0342972	0.145147	-0.236292	0.813206	0.999972
gene-LOC114109996|LOC114109996	10809.2	0.208098	0.15109	1.37731	0.168417	0.999972
gene-RPL13|RPL13	11230.3	0.0397124	0.118571	0.334925	0.737682	0.999972
gene-HSPA5|HSPA5	11604.1	-0.0584746	0.192998	-0.302981	0.761904	0.999972
gene-RPL21|RPL21	11711.1	-0.0172917	0.115417	-0.14982	0.880907	0.999972
gene-RPS14|RPS14	10909.4	-0.00585592	0.111752	-0.0524011	0.958209	0.999972
gene-RPS3|RPS3	12023.5	-0.0223674	0.101922	-0.219456	0.826295	0.999972
gene-CYSTM1|CYSTM1	7809.64	-0.143988	0.211324	-0.68136	0.495644	0.999972
gene-RPS27A|RPS27A	11032.5	0.0280862	0.105942	0.265109	0.790926	0.999972
gene-CELA1|CELA1	7635.03	-0.421472	0.659209	-0.63936	0.522589	0.999972
gene-RPS3A|RPS3A	10259.1	-0.00614976	0.0916433	-0.0671055	0.946498	0.999972
gene-LOC101117703|LOC101117703	7372.26	-0.317353	0.341167	-0.930199	0.352268	0.999972
gene-LGALS4|LGALS4	9014.38	-0.154242	0.158084	-0.975697	0.329215	0.999972
gene-PABPC1|PABPC1	9712.74	0.159018	0.125718	1.26487	0.205916	0.999972
gene-SLC9A1|SLC9A1	8406.41	0.0801516	0.138104	0.580373	0.561663	0.999972
gene-LOC101109747|LOC101109747	5842.94	-0.521023	0.332963	-1.56481	0.117628	0.999972
gene-LOC121818850|LOC121818850	9916.38	0.0193679	0.18017	0.107498	0.914394	0.999972
gene-SLC25A6|SLC25A6	9245.87	0.0609434	0.0917737	0.664062	0.50665	0.999972
gene-MYL6|MYL6	10066.5	-0.0563896	0.0509031	-1.10778	0.267956	0.999972
gene-GSN|GSN	11722.5	-0.195491	0.158366	-1.23442	0.217045	0.999972
gene-SPINT2|SPINT2	9831.7	-0.112543	0.125616	-0.895933	0.370288	0.999972
gene-EIF4A2|EIF4A2	9124.19	-0.0831911	0.0984136	-0.845321	0.397932	0.999972
gene-LOC101108520|LOC101108520	8308.34	0.0772126	0.147807	0.522389	0.6014	0.999972
gene-CFI|CFI	5619.5	-0.412185	0.495008	-0.832683	0.405024	0.999972
gene-MUC1|MUC1	8043.05	0.00325692	0.147776	0.0220396	0.982416	0.999972
gene-HSP90AA1|HSP90AA1	11949.8	-0.164544	0.197459	-0.83331	0.40467	0.999972
gene-RPL9|RPL9	10097.3	-0.0193801	0.107564	-0.180172	0.857017	0.999972
gene-LOC101113728|LOC101113728	7475.5	-0.275186	0.251955	-1.0922	0.274743	0.999972
gene-CKB|CKB	9426.62	0.100992	0.257643	0.391982	0.695071	0.999972
gene-LOC101119169|LOC101119169	10014.5	0.0479582	0.0737057	0.650671	0.515259	0.999972
gene-DST|DST	8654.78	0.0652321	0.152554	0.427599	0.668943	0.999972
gene-LOC101109680|LOC101109680	8802.33	0.0372151	0.076493	0.486516	0.626601	0.999972
gene-RPL11|RPL11	9645.66	-0.0233697	0.0880692	-0.265356	0.790735	0.999972
gene-ATP2A3|ATP2A3	8276.31	-0.248547	0.254166	-0.97789	0.328129	0.999972
gene-RPS6|RPS6	10336.3	-0.0428846	0.105677	-0.405808	0.684884	0.999972
gene-RPL14|RPL14	10112.1	-0.00909164	0.0860594	-0.105644	0.915865	0.999972
gene-LOC105603225|LOC105603225	8185.4	-0.529637	0.248951	-2.12748	0.0333804	0.999972
gene-TMPRSS2|TMPRSS2	8926.73	0.316862	0.150984	2.09865	0.035848	0.999972
gene-RPL23A|RPL23A	9194.08	-0.031338	0.0895218	-0.35006	0.726294	0.999972
gene-CDH1|CDH1	7578.9	-0.0376651	0.145913	-0.258134	0.796303	0.999972
gene-COTL1|COTL1	6230.14	-0.00517596	0.291683	-0.0177452	0.985842	0.999972
gene-RPL23|RPL23	10043	-0.0391159	0.0946065	-0.413459	0.67927	0.999972
gene-CPSF6|CPSF6	4478.67	-0.410072	0.252728	-1.62259	0.104678	0.999972
gene-RPL6|RPL6	8789.02	-0.0296825	0.107152	-0.277012	0.781771	0.999972
gene-HSP90AB1|HSP90AB1	9962.21	0.0416334	0.108781	0.382727	0.701922	0.999972
gene-RPS4X|RPS4X	9854.86	-0.0435278	0.105669	-0.411926	0.680393	0.999972
gene-SF3B1|SF3B1	9469.45	0.0235779	0.0600017	0.392953	0.694354	0.999972
gene-FLNB|FLNB	8766.92	-0.103438	0.166901	-0.61976	0.535416	0.999972
gene-RPS12|RPS12	9590.86	-0.026957	0.112796	-0.238989	0.811114	0.999972
gene-PLEC|PLEC	9100.27	-0.139967	0.18343	-0.763054	0.445431	0.999972
gene-CANX|CANX	9032.2	-0.0459922	0.0701796	-0.65535	0.512242	0.999972
gene-CLTC|CLTC	8904.65	0.0559138	0.0692469	0.807455	0.419405	0.999972
gene-ERBB3|ERBB3	6979.47	-0.110406	0.139387	-0.792085	0.428311	0.999972
gene-VSIG1|VSIG1	6335.81	-0.237605	0.167026	-1.42256	0.154863	0.999972
gene-RPS7|RPS7	9423.2	-0.0221292	0.111776	-0.197978	0.843063	0.999972
gene-RPS5|RPS5	8823.64	-0.0449621	0.0744948	-0.603561	0.546136	0.999972
gene-LOC105603415|LOC105603415	8267.03	0.0187268	0.0869028	0.215492	0.829384	0.999972
gene-SYTL2|SYTL2	6678.98	-0.112237	0.130328	-0.861187	0.389135	0.999972
gene-CDC42EP1|CDC42EP1	8639.89	0.0543693	0.249472	0.217937	0.827478	0.999972
gene-LOC121819815|LOC121819815	8909.19	0.136958	0.186238	0.735389	0.462103	0.999972
gene-GOLM1|GOLM1	7842.19	-0.000680893	0.155586	-0.00437632	0.996508	0.999972
gene-RPL31|RPL31	8538	-0.0494855	0.0952372	-0.519602	0.603341	0.999972
gene-LENG8|LENG8	8433.8	-0.054718	0.106155	-0.515456	0.606234	0.999972
gene-HID1|HID1	7597.58	0.119792	0.173829	0.689134	0.490739	0.999972
gene-LOC101115640|LOC101115640	9652.86	0.0263603	0.0667555	0.394879	0.692932	0.999972
gene-DYNC1H1|DYNC1H1	8123.9	0.104744	0.103004	1.01689	0.309204	0.999972
gene-CTSD|CTSD	7420.81	-0.0176271	0.149034	-0.118276	0.905849	0.999972
gene-RPL32|RPL32	8664.55	-0.0878616	0.105669	-0.83148	0.405703	0.999972
gene-GAPDH|GAPDH	7083.38	0.158354	0.162383	0.975186	0.329468	0.999972
gene-MFSD4A|MFSD4A	7303.78	0.210331	0.252594	0.832683	0.405024	0.999972
gene-EZR|EZR	8440.89	-0.29121	0.138792	-2.09818	0.0358892	0.999972
gene-ELAPOR1|ELAPOR1	7284.42	0.216564	0.159088	1.36128	0.173424	0.999972
gene-RPL7|RPL7	8876.69	-0.0174453	0.0892386	-0.195491	0.845009	0.999972
gene-LOC101101945|LOC101101945	9152.26	0.0596997	0.119724	0.498644	0.61803	0.999972
gene-KEF53_r01	7489.22	0.18152	0.275791	0.658179	0.510423	0.999972
gene-RPL35|RPL35	8334.29	-0.0640816	0.107543	-0.595869	0.551262	0.999972
gene-ALDOA|ALDOA	8527.43	0.161351	0.0938408	1.71941	0.0855395	0.999972
gene-KRT18|KRT18	8287.39	-0.195799	0.198616	-0.985817	0.324223	0.999972
gene-S100A2|S100A2	8198.92	-0.0198535	0.195438	-0.101585	0.919086	0.999972
gene-KEF53_t12	8859.17	0.176534	0.116972	1.50919	0.131249	0.999972
gene-LOC121818464|LOC121818464	8667.29	0.266439	0.250597	1.06322	0.287683	0.999972
gene-PFN1|PFN1	7772.19	-0.0604905	0.140021	-0.43201	0.665734	0.999972
gene-CD164|CD164	7846.12	-0.0683449	0.109917	-0.621785	0.534083	0.999972
gene-PSMB8|PSMB8	5619.6	-0.215739	0.220908	-0.976603	0.328766	0.999972
gene-YWHAZ|YWHAZ	7270.25	-0.0653197	0.127041	-0.514164	0.607138	0.999972
gene-RPS10|RPS10	8157.3	-0.0473617	0.0979716	-0.483423	0.628796	0.999972
gene-RPL18|RPL18	8286.25	-0.0730043	0.0852759	-0.856095	0.391945	0.999972
gene-SLC5A5|SLC5A5	6425.92	-0.169646	0.253484	-0.669257	0.503332	0.999972
gene-LASP1|LASP1	7605.23	-0.169327	0.0844014	-2.00621	0.0448336	0.999972
gene-DDX3X|DDX3X	7398.19	0.0423027	0.0834364	0.507006	0.612151	0.999972
gene-LOC101108817|LOC101108817	9655.3	-0.0888974	0.2913	-0.305174	0.760233	0.999972
gene-FOSL2|FOSL2	6204.54	-0.0631152	0.141522	-0.445974	0.655616	0.999972
gene-HNRNPA3|HNRNPA3	8278.62	-0.0803974	0.0893081	-0.900225	0.368001	0.999972
gene-EIF4B|EIF4B	7684.73	0.0709566	0.0871073	0.814589	0.415308	0.999972
gene-ALDH1A1|ALDH1A1	8369	0.0417448	0.112201	0.372055	0.709852	0.999972
gene-TM9SF3|TM9SF3	7352.23	0.0721871	0.0832214	0.867411	0.385717	0.999972
gene-RPS19|RPS19	7770.67	-0.028494	0.0668669	-0.426131	0.670013	0.999972
gene-RPS16|RPS16	8510.14	-0.0223734	0.111514	-0.200634	0.840985	0.999972
gene-TSPAN3|TSPAN3	6616.28	-0.0392255	0.14123	-0.277743	0.78121	0.999972
gene-ADAM28|ADAM28	5624.09	0.533031	0.333887	1.59644	0.11039	0.999972
gene-RPS9|RPS9	7976.25	0.0470032	0.087067	0.539851	0.5893	0.999972
gene-CHGA|CHGA	5998.95	0.615789	0.532315	1.15681	0.247349	0.999972
gene-LOC101111593|LOC101111593	10230.9	-0.0679509	0.224481	-0.302702	0.762117	0.999972
gene-PDIA6|PDIA6	7454.08	-0.270258	0.182257	-1.48284	0.138118	0.999972
gene-HNRNPA1|HNRNPA1	7835.28	0.00678811	0.0743215	0.0913344	0.927227	0.999972
gene-SON|SON	7383.74	0.0162047	0.0766091	0.211524	0.832478	0.999972
gene-ARGLU1|ARGLU1	7685.64	0.0318909	0.127214	0.250687	0.802056	0.999972
gene-H3F3A|H3F3A	6537.3	-0.0509877	0.115625	-0.440974	0.659232	0.999972
gene-LOC654403|LOC654403	10806.9	0.147519	0.192443	0.766557	0.443345	0.999972
gene-PTMA|PTMA	8213.09	-0.0915276	0.101658	-0.90035	0.367934	0.999972
gene-RPL18A|RPL18A	7530.62	-0.0616624	0.0965661	-0.638551	0.523115	0.999972
gene-CTNNB1|CTNNB1	7446.54	0.0311123	0.0661669	0.470209	0.638206	0.999972
gene-B4GALNT2|B4GALNT2	4905.77	0.225991	0.212594	1.06302	0.287775	0.999972
gene-COL3A1|COL3A1	8686.6	-0.341609	0.296155	-1.15348	0.248712	0.999972
gene-LOC101111229|LOC101111229	7404.3	-0.0335782	0.0982908	-0.341621	0.732636	0.999972
gene-LOC101106471|LOC101106471	7359.3	-0.00817204	0.091394	-0.0894154	0.928752	0.999972
gene-MLPH|MLPH	5927.22	-0.132142	0.117979	-1.12005	0.262692	0.999972
gene-RPS20|RPS20	7171.11	-0.113496	0.11729	-0.967659	0.333215	0.999972
gene-HNRNPF|HNRNPF	6867.9	-0.0710147	0.0583071	-1.21794	0.223246	0.999972
gene-CAP1|CAP1	6650.14	-0.0331139	0.10394	-0.318587	0.75004	0.999972
gene-SFPQ|SFPQ	7355.52	0.0250283	0.0727448	0.344056	0.730804	0.999972
gene-IQGAP1|IQGAP1	6731.82	-0.0681284	0.117055	-0.582021	0.560553	0.999972
gene-RNF213|RNF213	6033.09	-0.567299	0.302374	-1.87615	0.0606346	0.999972
gene-RPL10A|RPL10A	7660.87	0.0893555	0.10111	0.883749	0.376832	0.999972
gene-LOC114114600|LOC114114600	5857.69	-0.143653	0.137075	-1.04799	0.294643	0.999972
gene-IDH2|IDH2	7174.41	0.167559	0.289634	0.578519	0.562914	0.999972
gene-ITM2B|ITM2B	6319.28	-0.0176254	0.111357	-0.158279	0.874237	0.999972
gene-EIF4G1|EIF4G1	7240.44	0.137297	0.101828	1.34833	0.177553	0.999972
gene-PDIA4|PDIA4	7383.1	0.056732	0.205872	0.275569	0.782879	0.999972
gene-OGT|OGT	7093.73	0.0345713	0.0891802	0.387656	0.69827	0.999972
gene-IQGAP2|IQGAP2	6750.78	0.044443	0.104305	0.426086	0.670045	0.999972
gene-RPL24|RPL24	6923.16	-0.0250705	0.0966402	-0.259421	0.79531	0.999972
gene-LOC101109582|LOC101109582	7114.74	0.133477	0.11755	1.13548	0.256172	0.999972
gene-LOC121816997|LOC121816997	2454.87	-0.300255	0.567524	-0.529062	0.596762	0.999972
gene-LOC101102156|LOC101102156	6009.02	-0.247528	0.234905	-1.05374	0.292003	0.999972
gene-LAP3|LAP3	4720.49	0.0599521	0.18759	0.319591	0.749278	0.999972
gene-PPIA|PPIA	7396.04	-0.0354406	0.121373	-0.291997	0.770289	0.999972
gene-TLN1|TLN1	5562.91	-0.0710162	0.111945	-0.634387	0.525828	0.999972
gene-CCNG1|CCNG1	7477.78	0.323542	0.225442	1.43515	0.151246	0.999972
gene-CAPN5|CAPN5	5333.4	0.0632364	0.235297	0.268751	0.788121	0.999972
gene-LOC101108522|LOC101108522	4692.86	-0.421343	0.336731	-1.25127	0.210835	0.999972
gene-YWHAB|YWHAB	6125.21	-0.0812564	0.081171	-1.00105	0.316802	0.999972
gene-RPS29|RPS29	6465.11	-0.0338678	0.0865952	-0.391105	0.695719	0.999972
gene-LOC101105179|LOC101105179	6268.81	0.101499	0.167565	0.605729	0.544695	0.999972
gene-RPL29|RPL29	7072.37	-0.011476	0.0864589	-0.132733	0.894404	0.999972
gene-SLC25A3|SLC25A3	6388.09	0.144282	0.148677	0.970438	0.331828	0.999972
gene-CTNND1|CTNND1	5775.21	0.0277706	0.0882465	0.314694	0.752994	0.999972
gene-RPL35A|RPL35A	6388.97	-0.00977767	0.116182	-0.084158	0.932931	0.999972
gene-ACO2|ACO2	6084.4	0.169427	0.166601	1.01696	0.30917	0.999972
gene-DNAJC3|DNAJC3	5555.52	0.0461326	0.132014	0.349451	0.726751	0.999972
gene-HNRNPU|HNRNPU	6454.15	0.0246164	0.0672571	0.366005	0.714361	0.999972
gene-BSG|BSG	6315.2	0.117187	0.0706854	1.65786	0.0973449	0.999972
gene-LARP1|LARP1	5621.52	0.108663	0.0936721	1.16004	0.246034	0.999972
gene-KEF53_p02|ND6	7420.02	0.292483	0.206699	1.41502	0.157064	0.999972
gene-LOC101116085|LOC101116085	3788.17	-0.210352	0.315617	-0.666478	0.505105	0.999972
gene-PRR13|PRR13	5818.12	-0.244987	0.198107	-1.23664	0.216221	0.999972
gene-RPLP2|RPLP2	6510.18	0.0328129	0.0999203	0.32839	0.742617	0.999972
gene-FAU|FAU	6325.07	-0.00853862	0.0661961	-0.12899	0.897366	0.999972
gene-SPTAN1|SPTAN1	6004.61	-0.0698629	0.110145	-0.634283	0.525896	0.999972
gene-CLIC1|CLIC1	6128.94	-0.165119	0.158366	-1.04264	0.297115	0.999972
gene-SDHA|SDHA	5823.19	0.130739	0.129762	1.00753	0.31368	0.999972
gene-ANXA2|ANXA2	7392.74	-0.105863	0.254879	-0.415347	0.677888	0.999972
gene-RPS17|RPS17	6808.12	-0.0558165	0.092781	-0.601595	0.547444	0.999972
gene-RPL37|RPL37	6289.87	-0.0617678	0.103514	-0.59671	0.550701	0.999972
gene-LOC101108931|LOC101108931	6326.16	-0.0775937	0.130034	-0.59672	0.550695	0.999972
gene-ITPR3|ITPR3	5332.21	-0.0545957	0.113857	-0.479512	0.631574	0.999972
gene-LYZ|LYZ	9281.25	0.0265482	0.738001	0.0359731	0.971304	0.999972
gene-FER1L6|FER1L6	4511.84	0.199402	0.190269	1.048	0.29464	0.999972
gene-EIF3A|EIF3A	5672.67	0.0681793	0.061087	1.1161	0.264379	0.999972
gene-LOC101107908|LOC101107908	8135.89	0.166193	0.33929	0.489826	0.624257	0.999972
gene-DDX39B|DDX39B	6958.44	0.020289	0.109685	0.184975	0.853249	0.999972
gene-MYRF|MYRF	6180.1	0.276567	0.180324	1.53372	0.125098	0.999972
gene-PCBP2|PCBP2	5649.33	0.0245921	0.0717608	0.342695	0.731828	0.999972
gene-ACTN4|ACTN4	5926.11	-0.0382722	0.104375	-0.366682	0.713856	0.999972
gene-SREBF2|SREBF2	5920.62	-0.0180913	0.0787896	-0.229616	0.81839	0.999972
gene-SEC61A1|SEC61A1	6269.14	0.0894525	0.113919	0.785232	0.432317	0.999972
gene-TPM4|TPM4	6126.86	0.0138659	0.214506	0.0646408	0.94846	0.999972
gene-ENO1|ENO1	5680.83	0.036784	0.143625	0.256112	0.797864	0.999972
gene-HNRNPL|HNRNPL	5340.39	-0.0176461	0.066202	-0.266549	0.789816	0.999972
gene-IZUMO1|IZUMO1	4785.71	-0.143741	0.332376	-0.432466	0.665403	0.999972
gene-SLC44A4|SLC44A4	4943.37	0.0549032	0.142323	0.385765	0.699671	0.999972
gene-DNM2|DNM2	5149.89	0.0240914	0.107726	0.223637	0.82304	0.999972
gene-GLG1|GLG1	5585.01	0.0909668	0.112019	0.812068	0.416753	0.999972
gene-CGN|CGN	5364.48	0.0231449	0.0648864	0.356699	0.721317	0.999972
gene-LDHB|LDHB	6203.39	0.0682303	0.233712	0.291941	0.770332	0.999972
gene-IRF1|IRF1	3402.94	-0.350064	0.270446	-1.2944	0.195529	0.999972
gene-LOC106990101|LOC106990101	7010.93	-0.243826	0.228777	-1.06578	0.286523	0.999972
gene-EIF5A|EIF5A	5808.24	0.0656134	0.129218	0.507773	0.611613	0.999972
gene-ETNK1|ETNK1	4383.89	-0.228389	0.150859	-1.51392	0.130045	0.999972
gene-CTNNA1|CTNNA1	5237.97	-0.0571899	0.0807416	-0.708308	0.478754	0.999972
gene-TMED10|TMED10	5995.58	-0.0189474	0.114809	-0.165034	0.868918	0.999972
gene-EIF4EBP2|EIF4EBP2	6146.68	0.0229407	0.102457	0.223906	0.82283	0.999972
gene-TGM2|TGM2	5303.47	0.265134	0.195731	1.35458	0.17555	0.999972
gene-ACSS1|ACSS1	5189.06	0.135188	0.225443	0.599656	0.548736	0.999972
gene-SUCLG2|SUCLG2	5139.03	0.0278907	0.116705	0.238985	0.811117	0.999972
gene-MATR3|MATR3	5431.31	-0.0753095	0.0717669	-1.04936	0.294012	0.999972
gene-OGDH|OGDH	5685.53	0.19286	0.184292	1.04649	0.295334	0.999972
gene-MACF1|MACF1	5690.24	0.161155	0.112629	1.43084	0.152476	0.999972
gene-LOC101110095|LOC101110095	5087.96	0.127918	0.147745	0.865806	0.386597	0.999972
gene-RPL15|RPL15	5668.55	-0.0291638	0.0734539	-0.397036	0.691341	0.999972
gene-MAT2A|MAT2A	5690.32	0.0231496	0.101637	0.227768	0.819827	0.999972
gene-TAP1|TAP1	3508.73	-0.335555	0.222029	-1.51131	0.130709	0.999972
gene-RPN1|RPN1	6230.87	0.100325	0.0945238	1.06137	0.288521	0.999972
gene-TUBB|TUBB	6115.31	-0.0874622	0.133055	-0.657338	0.510963	0.999972
gene-SLC9A3R1|SLC9A3R1	4882.59	-0.071664	0.209551	-0.341988	0.73236	0.999972
gene-CALM1|CALM1	5375.16	0.0347772	0.0945136	0.36796	0.712903	0.999972
gene-CD47|CD47	4256.21	0.087005	0.15053	0.577993	0.563269	0.999972
gene-FLNA|FLNA	6963.76	-0.190096	0.217919	-0.872325	0.383031	0.999972
gene-LRP10|LRP10	4791.72	0.0275442	0.0995054	0.276811	0.781925	0.999972
gene-ARPC2|ARPC2	5121.92	-0.0643759	0.11495	-0.560033	0.575457	0.999972
gene-CST3|CST3	6781.86	-0.0468099	0.246466	-0.189924	0.849369	0.999972
gene-PTPRF|PTPRF	4488.8	0.100605	0.176353	0.570474	0.568356	0.999972
gene-EIF4H|EIF4H	5037.45	-0.0843565	0.0724236	-1.16477	0.244114	0.999972
gene-RPS23|RPS23	5438.24	-0.0507737	0.0920862	-0.551371	0.581379	0.999972
gene-PRRC2A|PRRC2A	5419.45	0.0705241	0.0686414	1.02743	0.304219	0.999972
gene-RPL26|RPL26	7037.02	-0.154328	0.189136	-0.815962	0.414522	0.999972
gene-CLSTN1|CLSTN1	4697.62	0.01096	0.0970069	0.112982	0.910045	0.999972
gene-ACSS2|ACSS2	4376.31	-0.295658	0.248725	-1.18869	0.23456	0.999972
gene-TAPBP|TAPBP	4054.32	-0.106572	0.150903	-0.706227	0.480047	0.999972
gene-DDX6|DDX6	5153.25	-0.0595988	0.0824242	-0.723075	0.469634	0.999972
gene-MYH11|MYH11	6200.38	-0.216446	0.177864	-1.21692	0.223635	0.999972
gene-COPA|COPA	5508.56	0.0334887	0.0834354	0.401373	0.688145	0.999972
gene-LOC101117086|LOC101117086	4842.95	-0.0594572	0.0847781	-0.701327	0.483099	0.999972
gene-LOC114109345|LOC114109345	4311.92	0.292557	0.288331	1.01466	0.310268	0.999972
gene-GNB1|GNB1	5316.37	0.129725	0.0846385	1.5327	0.12535	0.999972
gene-YWHAE|YWHAE	5450.14	0.0648015	0.0533809	1.21395	0.224769	0.999972
gene-RBMX|RBMX	5144.93	-0.048392	0.0668522	-0.723866	0.469148	0.999972
gene-RPS26|RPS26	5863.26	-0.0193757	0.105131	-0.1843	0.853778	0.999972
gene-ACIN1|ACIN1	5216.35	0.0618565	0.0698569	0.885474	0.375901	0.999972
gene-EFHD2|EFHD2	4335.15	-0.0052398	0.117152	-0.0447264	0.964325	0.999972
gene-FAM234A|FAM234A	5298.07	-0.0262422	0.104849	-0.250287	0.802366	0.999972
gene-TGOLN2|TGOLN2	5256.81	0.071625	0.0766088	0.934944	0.349817	0.999972
gene-NCOR1|NCOR1	4713.01	0.0212181	0.0931223	0.227852	0.819762	0.999972
gene-ZFP36L2|ZFP36L2	4188.23	-0.0119101	0.130475	-0.0912828	0.927268	0.999972
gene-RETSAT|RETSAT	3920	-0.258821	0.205406	-1.26005	0.207652	0.999972
gene-MRCL3|MRCL3	4749.58	-0.104879	0.103388	-1.01443	0.31038	0.999972
gene-ELF3|ELF3	4053.72	-0.0770776	0.149004	-0.517287	0.604956	0.999972
gene-SRSF1|SRSF1	5223.38	-0.0682511	0.0598611	-1.14016	0.25422	0.999972
gene-LOC101117112|LOC101117112	4723.8	-0.878723	0.392809	-2.23703	0.0252847	0.999972
gene-LOC101103343|LOC101103343	3913.53	-0.106933	0.20584	-0.519497	0.603414	0.999972
gene-LOC114114921|LOC114114921	4394.31	0.0343624	0.355892	0.096553	0.923081	0.999972
gene-KMT2D|KMT2D	5140.12	0.11503	0.130327	0.882625	0.377439	0.999972
gene-RPL39|RPL39	5106.82	-0.0270759	0.13025	-0.207877	0.835325	0.999972
gene-LOC101117673|LOC101117673	5809.51	0.080445	0.124217	0.647619	0.517232	0.999972
gene-ATRN|ATRN	4868.34	0.121796	0.231849	0.525327	0.599356	0.999972
gene-DSTN|DSTN	4868.71	-0.135991	0.121775	-1.11674	0.264107	0.999972
gene-PTBP1|PTBP1	4922.14	-0.0379561	0.0827409	-0.458734	0.646425	0.999972
gene-NNT|NNT	5133.38	0.209703	0.258334	0.811753	0.416933	0.999972
gene-RPS27|RPS27	5051.21	-0.00170957	0.101767	-0.0167988	0.986597	0.999972
gene-RPS25|RPS25	4974.33	-0.0300953	0.107735	-0.279346	0.779979	0.999972
gene-BCAS1|BCAS1	5052.48	-0.0749519	0.151638	-0.494281	0.621108	0.999972
gene-SH3BGRL2|SH3BGRL2	3937.53	-0.0453419	0.18396	-0.246477	0.805313	0.999972
gene-TMED2|TMED2	5617.18	0.0567421	0.0974761	0.582113	0.56049	0.999972
gene-TMBIM1|TMBIM1	4649.85	-0.0574687	0.0950601	-0.604552	0.545477	0.999972
gene-MIA3|MIA3	5054.52	-0.0128431	0.134347	-0.0955963	0.923841	0.999972
gene-LOC101113946|LOC101113946	5009.41	-0.0688902	0.103584	-0.665066	0.506008	0.999972
gene-RPS15|RPS15	5078.21	-0.0888913	0.0930373	-0.955437	0.339357	0.999972
gene-COL17A1|COL17A1	4569.28	0.0666885	0.245156	0.272025	0.785603	0.999972
gene-LOC114108618|LOC114108618	2377.78	-1.33288	0.565971	-2.35504	0.0185206	0.999972
gene-RPN2|RPN2	5491.41	-0.0185285	0.111541	-0.166113	0.868068	0.999972
gene-ATF4|ATF4	5816.75	0.156195	0.147898	1.05611	0.29092	0.999972
gene-SYT8|SYT8	5260.26	-0.272275	0.233481	-1.16615	0.243552	0.999972
gene-ZC3H11A|ZC3H11A	5436.77	0.0123857	0.0871442	0.142129	0.886978	0.999972
gene-PLAAT3|PLAAT3	4731.8	-0.149774	0.118135	-1.26782	0.204863	0.999972
gene-TALDO1|TALDO1	4497.32	-0.0369489	0.123543	-0.299076	0.764882	0.999972
gene-PRPF8|PRPF8	4924.52	0.118602	0.0763575	1.55325	0.120363	0.999972
gene-ARCN1|ARCN1	4945.63	-0.0423442	0.111486	-0.379817	0.704082	0.999972
gene-CFL1|CFL1	4775.04	-0.0566554	0.154404	-0.366929	0.713672	0.999972
gene-NLRC5|NLRC5	3099.24	-0.416981	0.192886	-2.1618	0.0306337	0.999972
gene-MGST3|MGST3	3884.15	-0.0994009	0.135075	-0.735893	0.461796	0.999972
gene-ERMP1|ERMP1	4535	0.0565453	0.126332	0.447594	0.654446	0.999972
gene-HNRNPDL|HNRNPDL	4918.11	-0.0141323	0.119624	-0.118139	0.905958	0.999972
gene-LGR4|LGR4	3838.64	-0.167174	0.207744	-0.804709	0.420988	0.999972
gene-LAPTM5|LAPTM5	3624.46	-0.352737	0.251777	-1.40099	0.161217	0.999972
gene-KARS1|KARS1	4374.39	-0.00834343	0.121336	-0.068763	0.945178	0.999972
gene-ESRP2|ESRP2	4779.42	-0.0416825	0.10946	-0.3808	0.703352	0.999972
gene-LOC101112495|LOC101112495	4014.65	-0.165316	0.167811	-0.98513	0.32456	0.999972
gene-SSR1|SSR1	5309.56	0.0380851	0.0877509	0.434014	0.664278	0.999972
gene-LOC114110433|LOC114110433	5116.63	0.0863265	0.111828	0.77196	0.440138	0.999972
gene-ARFGEF3|ARFGEF3	4488.1	0.188724	0.0874917	2.15705	0.0310016	0.999972
gene-CLCA1|CLCA1	29740.2	1.35994	0.764775	1.77822	0.0753675	0.999972
gene-SRSF6|SRSF6	5408	0.0622437	0.0971958	0.640395	0.521916	0.999972
gene-YBX1|YBX1	5369.51	0.0456421	0.107579	0.424264	0.671373	0.999972
gene-DAG1|DAG1	4284.85	0.0474333	0.122724	0.386504	0.699124	0.999972
gene-LOC114109611|LOC114109611	2154.6	-0.96147	0.598651	-1.60606	0.108261	0.999972
gene-NCL|NCL	5478.96	0.0136848	0.124777	0.109674	0.912668	0.999972
gene-GOLGB1|GOLGB1	4479.44	0.0350364	0.118878	0.294726	0.768203	0.999972
gene-UBR4|UBR4	4419.05	0.140314	0.12735	1.1018	0.270548	0.999972
gene-CD9|CD9	4741.76	-0.360323	0.249628	-1.44344	0.148897	0.999972
gene-BTG1|BTG1	4307.14	-0.156964	0.102793	-1.527	0.126762	0.999972
gene-A4GNT|A4GNT	4302.83	0.246906	0.29822	0.82793	0.40771	0.999972
gene-PKM|PKM	5170.46	0.179285	0.136825	1.31032	0.190087	0.999972
gene-OS9|OS9	4663.88	0.00876321	0.0471924	0.185691	0.852687	0.999972
gene-ARHGDIA|ARHGDIA	4699.79	-0.0271065	0.107664	-0.251768	0.80122	0.999972
gene-ACTR3|ACTR3	4188.24	-0.0853078	0.114253	-0.746658	0.45527	0.999972
gene-ACTR2|ACTR2	3920.97	-0.0737003	0.100404	-0.734039	0.462925	0.999972
gene-ABLIM1|ABLIM1	4418.97	-0.129969	0.119058	-1.09164	0.27499	0.999972
gene-RAB11FIP1|RAB11FIP1	3921.96	-0.0423598	0.134728	-0.314409	0.75321	0.999972
gene-CSDE1|CSDE1	4701.98	0.0355007	0.0456823	0.777121	0.437087	0.999972
gene-HSPA9|HSPA9	4867.57	0.164815	0.0796236	2.06993	0.0384587	0.999972
gene-HADHA|HADHA	4307.5	0.106828	0.0932315	1.14584	0.251862	0.999972
gene-SQSTM1|SQSTM1	4073.2	-0.136649	0.109601	-1.24679	0.212475	0.999972
gene-CAPRIN1|CAPRIN1	4810.22	0.121557	0.0825275	1.47293	0.140769	0.999972
gene-ARF1|ARF1	4428.03	-0.00477666	0.0748554	-0.0638119	0.94912	0.999972
gene-LOC101111547|LOC101111547	4849.88	0.0611596	0.0632812	0.966474	0.333807	0.999972
gene-TRANK1|TRANK1	3682.32	-0.32441	0.160639	-2.0195	0.043435	0.999972
gene-ATP5MC2|ATP5MC2	4363.11	0.030001	0.107187	0.279894	0.779559	0.999972
gene-PRRC2C|PRRC2C	4523.61	0.117944	0.0582929	2.0233	0.0430423	0.999972
gene-CD63|CD63	4962.94	-0.162906	0.0821206	-1.98374	0.0472846	0.999972
gene-CTSC|CTSC	3686.75	-0.0720463	0.152881	-0.471258	0.637457	0.999972
gene-DDB1|DDB1	4277.74	0.084123	0.0815604	1.03142	0.302344	0.999972
gene-ATP9A|ATP9A	4229.5	0.0719234	0.104196	0.690268	0.490026	0.999972
gene-SAT1|SAT1	3687.93	-0.248645	0.194636	-1.27749	0.20143	0.999972
gene-SMG1|SMG1	4159.65	0.0290972	0.108279	0.268726	0.788141	0.999972
gene-COPG1|COPG1	4461.66	0.0310993	0.113719	0.273476	0.784488	0.999972
gene-TNS3|TNS3	4129.79	-0.0253192	0.0908817	-0.278595	0.780556	0.999972
gene-RHOA|RHOA	4261.02	-0.110219	0.11248	-0.979901	0.327135	0.999972
gene-PPIB|PPIB	4584.36	-0.0543428	0.0938837	-0.578831	0.562703	0.999972
gene-PLXNB2|PLXNB2	4206.81	-0.0166009	0.0955824	-0.173681	0.862116	0.999972
gene-SLC9A4|SLC9A4	3564.13	0.172234	0.284632	0.605112	0.545105	0.999972
gene-LOC114110979|LOC114110979	5760.68	-0.230385	0.241314	-0.954712	0.339723	0.999972
gene-SERPING1|SERPING1	2681.81	-0.226424	0.28921	-0.782908	0.433681	0.999972
gene-PCMTD1|PCMTD1	3749.94	-0.031602	0.159154	-0.198562	0.842605	0.999972
gene-ZKSCAN1|ZKSCAN1	4103.34	0.148885	0.0912198	1.63216	0.102647	0.999972
gene-TOP2B|TOP2B	3973.68	0.0310459	0.0826795	0.375497	0.707291	0.999972
gene-LOC101123672|LOC101123672	4169.51	-0.0335368	0.213817	-0.156848	0.875365	0.999972
gene-HMGCS1|HMGCS1	4129.1	-0.290023	0.288233	-1.00621	0.314315	0.999972
gene-ITGB1|ITGB1	5036.96	0.0819879	0.141031	0.581348	0.561006	0.999972
gene-CSNK1A1|CSNK1A1	4525.63	0.0716372	0.0481894	1.48657	0.137127	0.999972
gene-RPL27|RPL27	4510.71	-0.0107413	0.105309	-0.101998	0.918758	0.999972
gene-PAPOLA|PAPOLA	4378.16	-0.004466	0.0687024	-0.065005	0.94817	0.999972
gene-LOC101120392|LOC101120392	1534.98	-0.138945	0.67355	-0.206288	0.836566	0.999972
gene-FUS|FUS	4104.73	-0.0153936	0.108506	-0.141869	0.887184	0.999972
gene-RAC1|RAC1	4245.69	-0.0109326	0.097929	-0.111638	0.911111	0.999972
gene-MCL1|MCL1	4780.85	-0.0210324	0.146469	-0.143596	0.885819	0.999972
gene-ATP5MC3|ATP5MC3	4373.38	0.093809	0.12007	0.781287	0.434633	0.999972
gene-LOC101115527|LOC101115527	4096.22	-0.182348	0.151599	-1.20284	0.22904	0.999972
gene-BRD2|BRD2	4456.64	-0.00527537	0.0568747	-0.0927542	0.926099	0.999972
gene-LOC105615677|LOC105615677	4220.77	0.113592	0.099617	1.14028	0.254168	0.999972
gene-NUMA1|NUMA1	4536.52	-0.0815391	0.0867069	-0.940399	0.347013	0.999972
gene-AKAP13|AKAP13	3788.94	0.0129562	0.137666	0.0941133	0.925019	0.999972
gene-LOC114110488|LOC114110488	3484.55	-0.185117	0.137527	-1.34604	0.178289	0.999972
gene-TRIP12|TRIP12	4138.24	0.0177159	0.0774843	0.228639	0.819149	0.999972
gene-ATP5F1C|ATP5F1C	4188.59	0.0949353	0.141695	0.669999	0.502858	0.999972
gene-AZIN1|AZIN1	4903.8	0.16692	0.160587	1.03943	0.298604	0.999972
gene-NACA|NACA	4469.85	0.0310901	0.0874389	0.355564	0.722167	0.999972
gene-DAZAP2|DAZAP2	3874.13	0.00243261	0.095397	0.0254999	0.979656	0.999972
gene-RBM39|RBM39	4434.87	0.0141437	0.0446961	0.316442	0.751667	0.999972
gene-ITGB4|ITGB4	4610.8	-0.166889	0.216551	-0.770669	0.440903	0.999972
gene-SMIM38|SMIM38	4329.99	0.0025543	0.957933	0.00266647	0.997872	0.999972
gene-KMT2C|KMT2C	4396.28	0.0467995	0.0997363	0.469232	0.638903	0.999972
gene-NBR1|NBR1	3882.28	-0.00902036	0.102017	-0.0884199	0.929543	0.999972
gene-ST14|ST14	4237.12	-0.0835534	0.131832	-0.633787	0.52622	0.999972
gene-MECOM|MECOM	4184.33	0.21304	0.167082	1.27506	0.202287	0.999972
gene-SUCLG1|SUCLG1	4257.93	0.12546	0.104223	1.20377	0.228678	0.999972
gene-SERBP1|SERBP1	4363.9	-0.0938701	0.0983197	-0.954743	0.339707	0.999972
gene-LOC101107641|LOC101107641	4436.85	-0.00538315	0.312072	-0.0172497	0.986237	0.999972
gene-RPL34|RPL34	4468.35	-0.00833168	0.111664	-0.0746136	0.940522	0.999972
gene-EWSR1|EWSR1	4290.47	-0.00541013	0.0683386	-0.0791665	0.9369	0.999972
gene-AHCY|AHCY	4367.5	0.222618	0.193529	1.15031	0.250015	0.999972
gene-HNRNPH3|HNRNPH3	4381.94	-0.0317642	0.0942067	-0.337176	0.735984	0.999972
gene-SNRNP200|SNRNP200	3915.38	0.0618078	0.0952314	0.649028	0.51632	0.999972
gene-LAMP1|LAMP1	3947.23	-0.0527349	0.0941387	-0.560183	0.575355	0.999972
gene-LOC101119435|LOC101119435	3039.59	-0.0237385	0.155508	-0.152651	0.878673	0.999972
gene-FXYD3|FXYD3	3409.48	-0.190854	0.17803	-1.07203	0.283707	0.999972
gene-PGC|PGC	6877.8	-0.590531	0.523454	-1.12814	0.259259	0.999972
gene-PBXIP1|PBXIP1	4408.93	0.146792	0.116748	1.25734	0.208632	0.999972
gene-FAM120A|FAM120A	3951.39	-0.00583597	0.0931587	-0.0626455	0.950049	0.999972
gene-HNF1A|HNF1A	4088.27	0.0708865	0.213856	0.331468	0.740291	0.999972
gene-PCBP1|PCBP1	4146.81	-0.0106737	0.0892739	-0.119561	0.904831	0.999972
gene-CAPNS1|CAPNS1	4210.86	-0.019978	0.0837222	-0.238623	0.811398	0.999972
gene-MKI67|MKI67	4164.39	0.00597137	0.212176	0.0281435	0.977548	0.999972
gene-MDH2|MDH2	4269.53	0.140925	0.109527	1.28666	0.198212	0.999972
gene-PDHA1|PDHA1	4442.59	0.199293	0.127496	1.56312	0.118023	0.999972
gene-PLS1|PLS1	3561.83	-0.36778	0.292456	-1.25756	0.208552	0.999972
gene-KCNQ1|KCNQ1	4669.09	0.201397	0.226027	0.891029	0.372913	0.999972
gene-CAMK2D|CAMK2D	3890.65	0.015913	0.108754	0.146321	0.883668	0.999972
gene-FAT1|FAT1	3472.23	0.106953	0.163761	0.653107	0.513687	0.999972
gene-RPL30|RPL30	4486.3	0.022891	0.0807502	0.28348	0.776809	0.999972
gene-PTP4A2|PTP4A2	3847.75	0.0248381	0.0669387	0.371058	0.710594	0.999972
gene-SLC9A2|SLC9A2	3939.05	0.3045	0.160167	1.90114	0.057284	0.999972
gene-SLC25A5|SLC25A5	3705.02	-0.036053	0.0847655	-0.425326	0.670599	0.999972
gene-MDH1|MDH1	4224.34	0.0994911	0.155591	0.639441	0.522536	0.999972
gene-OAZ1|OAZ1	4440.91	-0.088028	0.0659299	-1.33518	0.181819	0.999972
gene-COL6A1|COL6A1	5662.55	0.273258	0.286746	0.952962	0.340609	0.999972
gene-CNOT1|CNOT1	3922.39	0.000517169	0.0792955	0.00652204	0.994796	0.999972
gene-LOC121817897|LOC121817897	3876.46	0.0412113	0.0789083	0.522268	0.601484	0.999972
gene-LOC114114483|LOC114114483	3943.71	-0.421209	0.299478	-1.40648	0.159582	0.999972
gene-SHROOM3|SHROOM3	3870.97	0.00693826	0.127413	0.0544548	0.956573	0.999972
gene-TRIM25|TRIM25	3245.17	-0.252855	0.162763	-1.55352	0.1203	0.999972
gene-YWHAG|YWHAG	4174.71	0.106822	0.0832651	1.28291	0.199523	0.999972
gene-AFDN|AFDN	4174.91	0.0620451	0.0742075	0.836103	0.403097	0.999972
gene-JAK1|JAK1	4093.9	0.0716306	0.0840268	0.852473	0.393951	0.999972
gene-RPL36AL|RPL36AL	3964.15	-0.0892005	0.0986082	-0.904596	0.36568	0.999972
gene-GANAB|GANAB	4386.44	0.136239	0.0715337	1.90454	0.05684	0.999972
gene-TNS4|TNS4	3331.37	0.0636659	0.23379	0.272321	0.785376	0.999972
gene-TM9SF2|TM9SF2	4078.76	-0.0347132	0.0714857	-0.485596	0.627254	0.999972
gene-PSME1|PSME1	3570.86	-0.139298	0.137654	-1.01194	0.311566	0.999972
gene-ATXN2L|ATXN2L	3800.67	0.0685204	0.0789136	0.868297	0.385232	0.999972
gene-VSIG2|VSIG2	4275	-0.00190752	0.130025	-0.0146704	0.988295	0.999972
gene-PNISR|PNISR	3885.3	-0.0546246	0.0903582	-0.604534	0.545489	0.999972
gene-EIF4A1|EIF4A1	4515.24	0.0439401	0.160693	0.273442	0.784513	0.999972
gene-CTDSP2|CTDSP2	3921.13	-0.0502737	0.0689883	-0.728727	0.466169	0.999972
gene-RPL28|RPL28	3908.12	0.0331401	0.108644	0.305035	0.76034	0.999972
gene-MIGA2|MIGA2	3388.59	0.101446	0.278304	0.364515	0.715474	0.999972
gene-CALCOCO2|CALCOCO2	3638.27	0.0840153	0.098749	0.850797	0.394882	0.999972
gene-LRP1|LRP1	4350.4	-0.0208046	0.201109	-0.10345	0.917606	0.999972
gene-FAM20C|FAM20C	5060.29	0.493411	0.401549	1.22877	0.219158	0.999972
gene-LOC121816987|LOC121816987	4912.91	0.271551	0.216272	1.2556	0.20926	0.999972
gene-HNRNPM|HNRNPM	4180.71	0.0490431	0.077818	0.630229	0.528545	0.999972
gene-UBA1|UBA1	4068.11	0.021756	0.056878	0.382502	0.702089	0.999972
gene-SEL1L|SEL1L	4596.64	0.169386	0.0896681	1.88903	0.0588877	0.999972
gene-SLC4A2|SLC4A2	4165.06	-0.0155312	0.365822	-0.0424556	0.966136	0.999972
gene-COL18A1|COL18A1	3747.83	-0.0420467	0.134531	-0.312544	0.754627	0.999972
gene-NSD1|NSD1	3981.76	0.0621958	0.0622304	0.999444	0.31758	0.999972
gene-CHP1|CHP1	3922.58	0.196704	0.0794247	2.47661	0.0132637	0.999972
gene-LOC114114485|LOC114114485	3915.4	-0.533794	0.342568	-1.55821	0.119183	0.999972
gene-MLEC|MLEC	4386.24	-0.0160142	0.143941	-0.111255	0.911414	0.999972
gene-VDAC1|VDAC1	4093.42	0.12963	0.0720732	1.79859	0.0720833	0.999972
gene-KIF1C|KIF1C	3841.2	-0.0476395	0.0774849	-0.614823	0.538672	0.999972
gene-LOC114108596|LOC114108596	4064.05	0.194731	0.157797	1.23406	0.21718	0.999972
gene-IGFBP5|IGFBP5	5607.58	-0.00320048	0.229279	-0.0139589	0.988863	0.999972
gene-OVAR-DRB1|OVAR-DRB1	2188.19	-0.541067	0.296305	-1.82605	0.0678433	0.999972
gene-PKN1|PKN1	4027.39	-0.0503575	0.0755541	-0.666509	0.505086	0.999972
gene-ERN2|ERN2	4025.26	-0.292046	0.177499	-1.64534	0.0998994	0.999972
gene-SRSF2|SRSF2	4335.3	0.0140032	0.0769741	0.18192	0.855645	0.999972
gene-TPM3|TPM3	3824.87	-0.0842039	0.123411	-0.682303	0.495047	0.999972
gene-LOC121818468|LOC121818468	4548.67	0.241957	0.216623	1.11695	0.264015	0.999972
gene-PGK1|PGK1	3559.99	0.0575254	0.129526	0.444123	0.656954	0.999972
gene-SERF2|SERF2	3955.26	0.0275621	0.0660136	0.417521	0.676297	0.999972
gene-RAC2|RAC2	2950.27	0.00341663	0.154194	0.022158	0.982322	0.999972
gene-RPS15A|RPS15A	4171.6	-0.0173904	0.12932	-0.134476	0.893026	0.999972
gene-RPL22|RPL22	4203.99	-0.0203887	0.108658	-0.187641	0.851158	0.999972
gene-NIBAN2|NIBAN2	3643.37	0.0430366	0.0869843	0.494763	0.620767	0.999972
gene-ELOVL6|ELOVL6	3037.74	-0.230601	0.217939	-1.0581	0.29001	0.999972
gene-LOC101117965|LOC101117965	3755.15	0.11417	0.108235	1.05484	0.2915	0.999972
gene-ERAP1|ERAP1	2838.09	0.0322089	0.227473	0.141594	0.8874	0.999972
gene-LOC101117638|LOC101117638	3889.8	-0.0265284	0.0917324	-0.289193	0.772434	0.999972
gene-AOX1|AOX1	2561.82	-0.143384	0.237644	-0.603358	0.546271	0.999972
gene-CEP295|CEP295	3396.69	-0.201435	0.1131	-1.78103	0.0749068	0.999972
gene-GATA6|GATA6	3884.79	0.0157209	0.16098	0.0976571	0.922205	0.999972
gene-ATP8B1|ATP8B1	3233.4	-0.0177748	0.126779	-0.140204	0.888499	0.999972
gene-RPS28|RPS28	4287.3	0.00323692	0.13008	0.0248841	0.980147	0.999972
gene-ABHD2|ABHD2	4006	0.11311	0.113792	0.99401	0.320218	0.999972
gene-CAPN2|CAPN2	3016.65	-0.161398	0.176988	-0.911916	0.361813	0.999972
gene-CREB3L1|CREB3L1	3573.83	0.203067	0.151054	1.34434	0.17884	0.999972
gene-TLE5|TLE5	3708.32	0.00857187	0.0867006	0.0988675	0.921244	0.999972
gene-MAL2|MAL2	3625.5	0.0189829	0.101534	0.186962	0.851691	0.999972
gene-LOC101102527|LOC101102527	3796.69	0.145226	0.0932539	1.55732	0.119394	0.999972
gene-STT3B|STT3B	3409.86	-0.0868423	0.0820489	-1.05842	0.289863	0.999972
gene-HERPUD1|HERPUD1	4333.17	-0.0614335	0.112276	-0.547164	0.584266	0.999972
gene-AP3D1|AP3D1	3831.96	0.0861569	0.0770951	1.11754	0.263763	0.999972
gene-TMEM248|TMEM248	3601.88	0.169607	0.0844826	2.00759	0.0446865	0.999972
gene-HECTD1|HECTD1	3661.71	0.0517103	0.0764152	0.676702	0.498595	0.999972
gene-PRKAR2A|PRKAR2A	4058.71	0.0637934	0.0964444	0.661452	0.508322	0.999972
gene-CCAR2|CCAR2	3832.75	0.102716	0.07558	1.35903	0.174136	0.999972
gene-LOC101108297|LOC101108297	12663.8	1.52165	0.710966	2.14026	0.0323336	0.999972
gene-USP9X|USP9X	3446.68	-0.132557	0.15311	-0.865763	0.38662	0.999972
gene-AP1G1|AP1G1	3612.86	0.0380947	0.0766138	0.49723	0.619027	0.999972
gene-COL1A1|COL1A1	4605.07	-0.17489	0.28823	-0.606774	0.544001	0.999972
gene-LOC101119486|LOC101119486	3477.51	-0.11326	0.107164	-1.05688	0.290566	0.999972
gene-TPI1|TPI1	3825.44	0.136781	0.0718371	1.90405	0.0569038	0.999972
gene-LOC101113964|LOC101113964	3913.03	0.0400645	0.0683996	0.585741	0.558049	0.999972
gene-KPNB1|KPNB1	3721.3	0.00941146	0.0926008	0.101635	0.919047	0.999972
gene-HIP1R|HIP1R	3382.72	-0.0219135	0.141503	-0.154862	0.87693	0.999972
gene-TMEM59|TMEM59	3645.41	-0.0180414	0.138858	-0.129927	0.896624	0.999972
gene-MYCBP2|MYCBP2	3807.97	0.150879	0.112834	1.33718	0.181162	0.999972
gene-DDR1|DDR1	4269.2	0.15092	0.245734	0.61416	0.539109	0.999972
gene-LOC101118285|LOC101118285	3605.88	-0.038377	0.0765603	-0.501265	0.616184	0.999972
gene-VDAC2|VDAC2	4000.65	0.198119	0.0919632	2.15433	0.0312145	0.999972
gene-RAB27B|RAB27B	3514.37	-0.111007	0.178068	-0.623394	0.533026	0.999972
gene-ALDH2|ALDH2	4296.85	-0.0454765	0.111103	-0.409317	0.682307	0.999972
gene-ARHGEF37|ARHGEF37	2645.67	-0.113185	0.180627	-0.626619	0.530909	0.999972
gene-MROH1|MROH1	3718.87	0.0771465	0.0992251	0.777489	0.43687	0.999972
gene-GFPT1|GFPT1	3787.58	-0.0797197	0.229182	-0.347845	0.727957	0.999972
gene-DSG2|DSG2	3673.38	-0.0816907	0.157481	-0.518733	0.603947	0.999972
gene-ACSL5|ACSL5	2750.15	-0.138125	0.213946	-0.645606	0.518535	0.999972
gene-PRDX1|PRDX1	3905.25	0.11935	0.147844	0.807274	0.419509	0.999972
gene-KHNYN|KHNYN	3185.43	-0.112238	0.124795	-0.899377	0.368452	0.999972
gene-SLC12A2|SLC12A2	3859.11	-0.0739068	0.13185	-0.560538	0.575112	0.999972
gene-EPS8L2|EPS8L2	3579.02	-0.00799076	0.111867	-0.0714311	0.943055	0.999972
gene-NONO|NONO	3732.42	0.0539386	0.0612059	0.881265	0.378175	0.999972
gene-SLC12A7|SLC12A7	3146.01	0.000909589	0.103212	0.00881282	0.992968	0.999972
gene-MORF4L2|MORF4L2	3849.73	-0.0229401	0.117284	-0.195594	0.844928	0.999972
gene-PRDX5|PRDX5	3700.74	0.0238828	0.115839	0.206172	0.836657	0.999972
gene-UBE2D3|UBE2D3	3738	-0.0347296	0.0754866	-0.460077	0.645461	0.999972
gene-THRAP3|THRAP3	3639.44	0.0208515	0.0418934	0.497728	0.618676	0.999972
gene-LOC114113024|LOC114113024	4152.03	-0.0422629	0.114235	-0.369965	0.711409	0.999972
gene-ITGA6|ITGA6	4140.12	0.0704757	0.0991076	0.711103	0.47702	0.999972
gene-SSR2|SSR2	3447.31	-0.0918834	0.0829011	-1.10835	0.267711	0.999972
gene-SENP6|SENP6	2771.76	-0.143272	0.294491	-0.486508	0.626607	0.999972
gene-BZW1|BZW1	3383	0.0274433	0.0919763	0.298373	0.765418	0.999972
gene-COL4A1|COL4A1	3837.39	0.102089	0.199158	0.512606	0.608227	0.999972
gene-NPM1|NPM1	4032.99	-0.066916	0.0945612	-0.707648	0.479164	0.999972
gene-KDELR2|KDELR2	3973.82	-0.163807	0.200208	-0.818184	0.413252	0.999972
gene-SLC25A4|SLC25A4	4005.77	-0.00407279	0.58918	-0.00691264	0.994485	0.999972
gene-ARID1A|ARID1A	3588.92	0.0935055	0.0732108	1.27721	0.201529	0.999972
gene-EIF3E|EIF3E	3318.38	-0.0460154	0.127121	-0.361982	0.717365	0.999972
gene-C7|C7	5736.59	0.382263	0.492594	0.77602	0.437737	0.999972
gene-PATJ|PATJ	3376.23	0.0934878	0.105162	0.888986	0.37401	0.999972
gene-LOC101108390|LOC101108390	3620.06	0.0169802	0.0534509	0.317678	0.750729	0.999972
gene-SDHD|SDHD	3355.51	0.0491167	0.071404	0.687871	0.491534	0.999972
gene-MYO5B|MYO5B	3563.88	0.150388	0.0857188	1.75443	0.0793561	0.999972
gene-LOC101106550|LOC101106550	4036.4	-0.0371491	0.0694216	-0.535122	0.592565	0.999972
gene-STAU1|STAU1	3789.01	0.207663	0.186487	1.11356	0.26547	0.999972
gene-EPN3|EPN3	2989.43	0.232636	0.318657	0.730052	0.465358	0.999972
gene-CD46|CD46	3576.7	0.137979	0.136965	1.00741	0.313739	0.999972
gene-BIRC6|BIRC6	3286.86	0.0713383	0.121384	0.587709	0.556728	0.999972
gene-AKAP9|AKAP9	3531.66	0.0287329	0.133991	0.214439	0.830204	0.999972
gene-PRPF4B|PRPF4B	3735.15	-0.0105101	0.0593893	-0.176969	0.859533	0.999972
gene-KIF5B|KIF5B	3523.99	0.0314685	0.0799588	0.393559	0.693907	0.999972
gene-PNN|PNN	3629.28	-0.0826304	0.0658895	-1.25408	0.209814	0.999972
gene-TACC1|TACC1	3549.05	0.103726	0.188657	0.549811	0.582449	0.999972
gene-LOC121818306|LOC121818306	3605.6	-0.023818	0.09147	-0.260391	0.794562	0.999972
gene-HMGB1|HMGB1	3938.17	-0.152425	0.146206	-1.04254	0.297162	0.999972
gene-NKTR|NKTR	3310.97	-0.00725339	0.079316	-0.0914493	0.927136	0.999972
gene-EIF5|EIF5	3708.67	0.026235	0.0866085	0.302915	0.761955	0.999972
gene-FASN|FASN	3106.13	-0.0464195	0.153149	-0.303101	0.761813	0.999972
gene-COL1A2|COL1A2	4007.64	-0.270939	0.297064	-0.912057	0.361739	0.999972
gene-LOC121816991|LOC121816991	2875.38	-0.51439	0.330707	-1.55543	0.119845	0.999972
gene-ST13|ST13	3298.41	0.00779293	0.0797311	0.0977402	0.922139	0.999972
gene-CHD4|CHD4	3741.01	0.174927	0.0772009	2.26587	0.0234592	0.999972
gene-CPM|CPM	3467.68	0.206351	0.224268	0.920108	0.357516	0.999972
gene-TEX2|TEX2	3097.79	0.0524729	0.0976352	0.537438	0.590965	0.999972
gene-RPL37A|RPL37A	5416.35	0.208939	0.2031	1.02875	0.303597	0.999972
gene-CAPZA1|CAPZA1	3291.24	-0.102729	0.111483	-0.921475	0.356803	0.999972
gene-ALDH9A1|ALDH9A1	2522.54	-0.0825552	0.171393	-0.481673	0.630039	0.999972
gene-PNRC2|PNRC2	3273.99	-0.0911963	0.0966284	-0.943783	0.34528	0.999972
gene-IGF1R|IGF1R	4098.72	0.258633	0.292954	0.882843	0.377321	0.999972
gene-FMN1|FMN1	2590.68	-0.183203	0.124066	-1.47665	0.139769	0.999972
gene-CD81|CD81	3100.49	-0.200368	0.116625	-1.71805	0.085788	0.999972
gene-SPARC|SPARC	4424.06	-0.00135662	0.23531	-0.00576524	0.9954	0.999972
gene-GOLGA4|GOLGA4	3869.6	0.0871524	0.134078	0.650011	0.515685	0.999972
gene-LOC101120595|LOC101120595	2416.09	-0.0911228	0.250616	-0.363595	0.71616	0.999972
gene-LOC101112891|LOC101112891	3395.55	-0.0816231	0.239994	-0.340105	0.733777	0.999972
gene-FUT1|FUT1	2883.24	-0.125239	0.313018	-0.4001	0.689083	0.999972
gene-ERBB2|ERBB2	3361.03	0.131173	0.102445	1.28042	0.200397	0.999972
gene-SEPTIN9|SEPTIN9	3436.27	-0.0140819	0.0773115	-0.182145	0.855469	0.999972
gene-LOC114118884|LOC114118884	2005.85	-0.579762	0.330795	-1.75263	0.0796654	0.999972
gene-EPCAM|EPCAM	3485.71	-0.0081625	0.101755	-0.0802172	0.936065	0.999972
gene-SEC16A|SEC16A	3605.74	0.0864458	0.097212	0.889251	0.373868	0.999972
gene-RBM5|RBM5	3736.26	0.0120248	0.0929134	0.129419	0.897026	0.999972
gene-RPS21|RPS21	3406.06	-0.060976	0.10186	-0.598624	0.549423	0.999972
gene-MYO15B|MYO15B	3167.06	-0.133964	0.196818	-0.680648	0.496094	0.999972
gene-PLXNB1|PLXNB1	3079.92	0.0496212	0.112996	0.439142	0.660559	0.999972
gene-ANXA1|ANXA1	4358.96	-0.297318	0.310922	-0.956247	0.338948	0.999972
gene-WDR1|WDR1	3030.91	-0.059162	0.0832746	-0.710444	0.477429	0.999972
gene-SERINC3|SERINC3	2935.49	-0.00373245	0.162958	-0.0229044	0.981727	0.999972
gene-LOC101113599|LOC101113599	3584.45	0.190657	0.120574	1.58125	0.113821	0.999972
gene-KANK4|KANK4	2426.07	0.405476	0.327759	1.23712	0.216044	0.999972
gene-UTRN|UTRN	3508.71	0.120894	0.148673	0.81315	0.416132	0.999972
gene-TAP2|TAP2	2538.19	-0.318278	0.210905	-1.5091	0.131272	0.999972
gene-FNDC3A|FNDC3A	3677.53	0.125928	0.0730851	1.72303	0.0848825	0.999972
gene-PICALM|PICALM	3242.1	-0.00732482	0.0751533	-0.0974651	0.922357	0.999972
gene-CALM3|CALM3	3101.91	-0.0869268	0.0975108	-0.891458	0.372683	0.999972
gene-SLC38A10|SLC38A10	3211.35	0.0645601	0.111285	0.580133	0.561825	0.999972
gene-SPATS2L|SPATS2L	2705.29	-0.344114	0.184371	-1.86643	0.0619819	0.999972
gene-HNRNPD|HNRNPD	3497.35	0.0415183	0.0831398	0.499379	0.617513	0.999972
gene-SELENOP|SELENOP	3295.18	0.0729112	0.181105	0.40259	0.68725	0.999972
gene-FKBP1A|FKBP1A	3717.48	0.220244	0.150703	1.46145	0.143893	0.999972
gene-LOC101112694|LOC101112694	3509.32	0.0427123	0.0664556	0.642719	0.520407	0.999972
gene-PROM1|PROM1	2470.83	0.587856	0.367492	1.59964	0.109677	0.999972
gene-UPF1|UPF1	3340.91	0.0821674	0.111664	0.735842	0.461827	0.999972
gene-ERBIN|ERBIN	3209.57	-0.0734876	0.0885058	-0.830314	0.406361	0.999972
gene-CERS2|CERS2	3454.73	0.150855	0.0731994	2.06088	0.0393146	0.999972
gene-SF1|SF1	3440.46	0.0427467	0.0651558	0.656069	0.51178	0.999972
gene-CTSA|CTSA	2917.79	-0.0473209	0.129194	-0.366277	0.714159	0.999972
gene-NET1|NET1	3866.38	-0.0363069	0.0748843	-0.48484	0.62779	0.999972
gene-LOC101122940|LOC101122940	3620.68	-0.453309	0.264836	-1.71166	0.0869594	0.999972
gene-ANXA5|ANXA5	3652.4	-0.138887	0.200505	-0.692684	0.488508	0.999972
gene-ATP5PB|ATP5PB	3542.95	0.128853	0.114176	1.12854	0.259091	0.999972
gene-TMEM171|TMEM171	2614.17	0.0621253	0.30286	0.205129	0.837472	0.999972
gene-ATP2A2|ATP2A2	3571.75	0.073261	0.126151	0.580741	0.561415	0.999972
gene-RAB5C|RAB5C	3194.06	-0.00612767	0.123485	-0.0496228	0.960423	0.999972
gene-PTPRC|PTPRC	2494.56	-0.37171	0.24149	-1.53924	0.123746	0.999972
gene-WNK1|WNK1	3002.37	0.08589	0.108636	0.790625	0.429163	0.999972
gene-GCNT3|GCNT3	2244.04	0.216672	0.327082	0.662441	0.507689	0.999972
gene-LOC100125357|LOC100125357	15718.7	-0.146162	0.665777	-0.219536	0.826233	0.999972
gene-C20H6orf132|C20H6orf132	3212.42	-0.0595734	0.07089	-0.840363	0.400705	0.999972
gene-NDUFS2|NDUFS2	3983.64	0.00225238	0.128403	0.0175415	0.986005	0.999972
gene-LOC114112057|LOC114112057	1895.14	-0.250292	0.27353	-0.915043	0.360169	0.999972
gene-LIMA1|LIMA1	3164.69	-0.101263	0.119278	-0.848962	0.395902	0.999972
gene-SARAF|SARAF	3244.44	0.0336697	0.0960595	0.350509	0.725957	0.999972
gene-EPHX1|EPHX1	3023.49	-0.10797	0.121869	-0.88595	0.375644	0.999972
gene-TXNDC5|TXNDC5	3159.67	0.219379	0.214742	1.02159	0.306974	0.999972
gene-TKT|TKT	3826.24	0.335304	0.177181	1.89244	0.0584327	0.999972
gene-BAG6|BAG6	3060.5	0.027317	0.0726958	0.375772	0.707086	0.999972
gene-KDM2A|KDM2A	3116.04	-0.0258623	0.0641143	-0.403378	0.68667	0.999972
gene-HOOK3|HOOK3	3054.46	0.0377275	0.0727072	0.518896	0.603833	0.999972
gene-NUPR1|NUPR1	3473.62	0.111242	0.194718	0.571299	0.567797	0.999972
gene-LOC101113583|LOC101113583	3204.47	-0.289104	0.261744	-1.10453	0.269363	0.999972
gene-EEF1D|EEF1D	3567.63	-0.0142974	0.106216	-0.134607	0.892922	0.999972
gene-COL6A2|COL6A2	4268.22	0.183465	0.300699	0.61013	0.541775	0.999972
gene-RAD21|RAD21	3278.38	-0.112852	0.0683529	-1.65101	0.0987359	0.999972
gene-AAK1|AAK1	3165.05	0.0896082	0.08773	1.02141	0.307061	0.999972
gene-UQCRH|UQCRH	3281.54	0.182674	0.117869	1.5498	0.12119	0.999972
gene-ARF6|ARF6	3410.92	-0.243018	0.187985	-1.29275	0.196097	0.999972
gene-KIAA0100|KIAA0100	3168.31	0.128392	0.0990673	1.29601	0.194972	0.999972
gene-HNRNPUL1|HNRNPUL1	3195.19	-0.0225926	0.0773257	-0.292175	0.770153	0.999972
gene-CLIC6|CLIC6	2734.55	0.184834	1.20173	0.153806	0.877762	0.999972
gene-PARP14|PARP14	2493.23	-0.541868	0.249749	-2.16965	0.0300332	0.999972
gene-DHX9|DHX9	3333.49	-0.0184075	0.0703218	-0.261761	0.793506	0.999972
gene-TSC22D1|TSC22D1	3254.23	-0.184009	0.173781	-1.05886	0.289665	0.999972
gene-LOC101104377|LOC101104377	4416.14	0.119802	0.247385	0.484275	0.628191	0.999972
gene-ATP5PO|ATP5PO	3041.75	0.0705937	0.100679	0.701178	0.483192	0.999972
gene-HNRNPAB|HNRNPAB	3474.78	0.0177414	0.116554	0.152216	0.879017	0.999972
gene-ARRB1|ARRB1	3311.13	-0.0619483	0.124186	-0.498833	0.617897	0.999972
gene-ZNF24|ZNF24	3121.22	-0.000742888	0.100931	-0.00736037	0.994127	0.999972
gene-SRSF3|SRSF3	3114.36	-0.0590027	0.106531	-0.553854	0.579679	0.999972
gene-WASF2|WASF2	3036.49	-0.080574	0.0651535	-1.23668	0.216206	0.999972
gene-NDUFS1|NDUFS1	3245.06	0.160499	0.116649	1.37591	0.16885	0.999972
gene-POLR2A|POLR2A	3005.22	0.136682	0.119058	1.14803	0.250957	0.999972
gene-LOC101121538|LOC101121538	3264.57	0.125346	0.121211	1.03411	0.301084	0.999972
gene-MAP3K1|MAP3K1	2936.25	0.0797376	0.170483	0.467716	0.639988	0.999972
gene-PRRC2B|PRRC2B	3137.89	-0.0174713	0.0685801	-0.254758	0.79891	0.999972
gene-AKAP11|AKAP11	3518.7	0.100576	0.0977442	1.02897	0.303495	0.999972
gene-LOC121816682|LOC121816682	3751.72	0.40173	0.200593	2.00271	0.0452083	0.999972
gene-TMBIM4|TMBIM4	2678.85	-0.0816002	0.11739	-0.695123	0.486978	0.999972
gene-TJP3|TJP3	2669.08	-0.185091	0.101411	-1.82515	0.0679778	0.999972
gene-USP7|USP7	3196.42	0.123721	0.0836282	1.47941	0.13903	0.999972
gene-C1S|C1S	3216.47	-0.199372	0.141844	-1.40557	0.159851	0.999972
gene-LOC101113705|LOC101113705	829.714	-0.581926	0.919639	-0.632776	0.52688	0.999972
gene-PSMB9|PSMB9	2002.38	-0.379274	0.255897	-1.48214	0.138304	0.999972
gene-CDC42BPB|CDC42BPB	2832.62	-0.0274556	0.0827836	-0.331656	0.740149	0.999972
gene-ALAS1|ALAS1	2653.22	0.0626707	0.151324	0.414149	0.678765	0.999972
gene-TMED7|TMED7	2906.12	-0.054682	0.132605	-0.412368	0.680069	0.999972
gene-SLC31A1|SLC31A1	3154.06	0.23184	0.144054	1.6094	0.10753	0.999972
gene-KDM5B|KDM5B	2996.84	0.0765917	0.0721155	1.06207	0.288204	0.999972
gene-SQOR|SQOR	3135.66	-0.0572588	0.172395	-0.332138	0.739785	0.999972
gene-INPPL1|INPPL1	3128.37	0.0669062	0.0925574	0.722862	0.469765	0.999972
gene-SPHK2|SPHK2	2640.9	-0.0348816	0.107063	-0.325805	0.744572	0.999972
gene-RAPGEFL1|RAPGEFL1	3049.11	-0.0408911	0.260915	-0.156722	0.875464	0.999972
gene-RPS6KA1|RPS6KA1	2769.74	-0.0388919	0.102103	-0.380909	0.703271	0.999972
gene-STT3A|STT3A	3280.5	0.0637861	0.102442	0.622654	0.533512	0.999972
gene-MLLT6|MLLT6	3009.82	-0.0780597	0.102574	-0.761006	0.446653	0.999972
gene-SSR4|SSR4	3374.99	-0.0112929	0.11387	-0.0991733	0.921001	0.999972
gene-NCOR2|NCOR2	3435.55	0.127306	0.145887	0.872633	0.382863	0.999972
gene-DLST|DLST	3319.51	0.124183	0.0896314	1.38549	0.165903	0.999972
gene-CDC42SE1|CDC42SE1	2922.11	0.0229563	0.0834775	0.275	0.783316	0.999972
gene-NUCB1|NUCB1	3406.79	0.0301411	0.109768	0.27459	0.783631	0.999972
gene-ANKRD11|ANKRD11	3071.71	0.102256	0.0809803	1.26272	0.206689	0.999972
gene-PTGR1|PTGR1	4209.62	0.138682	0.498131	0.278405	0.780701	0.999972
gene-SULT1C2|SULT1C2	2431.43	-0.177696	0.185883	-0.955957	0.339094	0.999972
gene-LOC101102760|LOC101102760	3129.31	-0.0448615	0.0740275	-0.606012	0.544507	0.999972
gene-FNBP4|FNBP4	2807.35	-0.0330185	0.0859847	-0.384005	0.700975	0.999972
gene-U2AF2|U2AF2	3004.27	0.0122482	0.0740998	0.165293	0.868713	0.999972
gene-VSIG10|VSIG10	2910.72	-0.0528895	0.158519	-0.333648	0.738645	0.999972
gene-MTCH1|MTCH1	3434.42	0.115026	0.111785	1.02899	0.303482	0.999972
gene-GALNT1|GALNT1	2789.32	0.0647365	0.16505	0.392223	0.694894	0.999972
gene-PLEKHA6|PLEKHA6	2937.14	-0.147127	0.130414	-1.12815	0.259257	0.999972
gene-ITGA3|ITGA3	3231.45	-0.0407355	0.179607	-0.226803	0.820577	0.999972
gene-PPP1CB|PPP1CB	3163.51	-0.0579752	0.0871897	-0.664932	0.506094	0.999972
gene-WWC1|WWC1	2652.11	0.186704	0.191167	0.976654	0.32874	0.999972
gene-HMGN2|HMGN2	3232.97	-0.191864	0.150003	-1.27907	0.200874	0.999972
gene-SYNE2|SYNE2	3205.5	0.189481	0.103833	1.82487	0.0680204	0.999972
gene-MAP4|MAP4	2983.98	-0.0122354	0.0853755	-0.143312	0.886044	0.999972
gene-NBEAL2|NBEAL2	2874.22	0.0168592	0.0835722	0.201732	0.840126	0.999972
gene-LOC443456|LOC443456	2119.63	-0.23863	0.151175	-1.5785	0.11445	0.999972
gene-GPI|GPI	3122.9	0.348062	0.149131	2.33393	0.0195992	0.999972
gene-ZDHHC7|ZDHHC7	2851.42	0.0466842	0.1187	0.393295	0.694102	0.999972
gene-LOC101109746|LOC101109746	1249.57	-0.530756	0.450236	-1.17884	0.238462	0.999972
gene-LOC105608566|LOC105608566	3256.7	0.0390319	0.0677248	0.57633	0.564392	0.999972
gene-PRKAR1A|PRKAR1A	3297.8	0.0338074	0.0666341	0.507359	0.611903	0.999972
gene-CTSH|CTSH	2350.44	0.119147	0.276685	0.430621	0.666744	0.999972
gene-GATA5|GATA5	2744.84	-0.0223117	0.140148	-0.159201	0.87351	0.999972
gene-RGL2|RGL2	2926.68	0.00402312	0.0902968	0.0445543	0.964463	0.999972
gene-ITGB6|ITGB6	1791.78	-0.295035	0.24745	-1.1923	0.233143	0.999972
gene-TRAM1|TRAM1	3438.2	0.00496088	0.0892071	0.0556108	0.955652	0.999972
gene-LOC101121541|LOC101121541	2340.51	0.0437084	0.141397	0.309119	0.757231	0.999972
gene-AHCYL1|AHCYL1	3214.24	0.150078	0.193825	0.774299	0.438754	0.999972
gene-YWHAQ|YWHAQ	3366.66	-0.0285908	0.0998146	-0.286439	0.774542	0.999972
gene-HYOU1|HYOU1	3461.06	0.0843408	0.189588	0.444863	0.656419	0.999972
gene-MYLK|MYLK	2838.38	-0.200285	0.160248	-1.24985	0.211355	0.999972
gene-RBM25|RBM25	2969.1	0.135437	0.0880105	1.53887	0.123836	0.999972
gene-EXPH5|EXPH5	2916.24	-0.121291	0.108197	-1.12102	0.262278	0.999972
gene-KMT2E|KMT2E	2712.67	0.0178623	0.0978417	0.182563	0.855141	0.999972
gene-LPIN2|LPIN2	2691.54	-0.0332066	0.158102	-0.210033	0.833642	0.999972
gene-SBDS|SBDS	2771.83	-0.0276362	0.120856	-0.228671	0.819125	0.999972
gene-KCNE3|KCNE3	3368.34	-0.189436	0.273121	-0.693596	0.487936	0.999972
gene-LMAN1|LMAN1	3907.07	0.081496	0.150085	0.542997	0.587132	0.999972
gene-PDXDC1|PDXDC1	2929.89	0.0667535	0.0677314	0.985561	0.324349	0.999972
gene-PDXK|PDXK	2700.86	0.0847881	0.091666	0.924968	0.354983	0.999972
gene-HNRNPUL2|HNRNPUL2	3097.96	0.016496	0.067818	0.243239	0.80782	0.999972
gene-ATP5MG|ATP5MG	2936.56	0.121495	0.12864	0.944453	0.344938	0.999972
gene-LMNA|LMNA	3550.4	-0.237199	0.250019	-0.948723	0.342762	0.999972
gene-PRDX2|PRDX2	3078.01	0.19174	0.143918	1.33229	0.182766	0.999972
gene-ACSM3|ACSM3	2959.8	0.0764821	0.0901071	0.848791	0.395998	0.999972
gene-ITPRID2|ITPRID2	3204.47	0.0985746	0.220447	0.447157	0.654762	0.999972
gene-LAMP2|LAMP2	2681.1	-0.0567531	0.115795	-0.490118	0.62405	0.999972
gene-PSMD2|PSMD2	3201.79	0.0964975	0.0780678	1.23607	0.216431	0.999972
gene-MYOF|MYOF	2725.18	0.0750307	0.175018	0.428702	0.66814	0.999972
gene-SRSF4|SRSF4	2831.23	-0.0282468	0.122648	-0.230308	0.817852	0.999972
gene-RANBP2|RANBP2	2860.88	-0.0553041	0.096601	-0.5725	0.566983	0.999972
gene-LOC114114491|LOC114114491	3359.72	-0.0143796	0.0805161	-0.178593	0.858258	0.999972
gene-ANXA11|ANXA11	2739.58	-0.103345	0.101002	-1.0232	0.306212	0.999972
gene-LOC121816994|LOC121816994	2329.23	-0.507648	0.286012	-1.77492	0.0759115	0.999972
gene-SLC44A2|SLC44A2	3191.39	-0.0935998	0.16155	-0.579385	0.562329	0.999972
gene-MARK2|MARK2	2656.58	-0.0558639	0.0848939	-0.658043	0.51051	0.999972
gene-LGALS3|LGALS3	2683.12	-0.0332247	0.17519	-0.18965	0.849583	0.999972
gene-EPRS1|EPRS1	3356.47	0.0606508	0.154858	0.391653	0.695314	0.999972
gene-PPP2R5C|PPP2R5C	3015.71	0.021699	0.0786017	0.276063	0.7825	0.999972
gene-ACTN1|ACTN1	2921.37	0.0402839	0.139144	0.289512	0.77219	0.999972
gene-VCL|VCL	2811.09	0.0546071	0.10485	0.520812	0.602497	0.999972
gene-GHITM|GHITM	2957.05	0.0608688	0.106526	0.5714	0.567728	0.999972
gene-G3BP1|G3BP1	3069.59	-0.0618709	0.0880067	-0.703025	0.48204	0.999972
gene-EHBP1L1|EHBP1L1	3137.76	-0.402952	0.232333	-1.73437	0.082852	0.999972
gene-SDC1|SDC1	2877.52	0.0720981	0.133035	0.54195	0.587853	0.999972
gene-BCL2L14|BCL2L14	2400.19	-0.152518	0.188863	-0.807558	0.419345	0.999972
gene-SLC35G1|SLC35G1	2719.18	-0.322305	0.269656	-1.19524	0.231991	0.999972
gene-BCLAF1|BCLAF1	2906.87	-0.0653668	0.0923885	-0.707521	0.479243	0.999972
gene-COPB2|COPB2	3088.27	-0.0270458	0.140494	-0.192506	0.847346	0.999972
gene-PEBP1|PEBP1	3145.44	-0.0623233	0.159028	-0.391901	0.695131	0.999972
gene-SMARCC1|SMARCC1	2918.07	-0.0338597	0.107568	-0.314774	0.752933	0.999972
gene-ATP13A3|ATP13A3	2978.91	0.193071	0.129338	1.49277	0.135499	0.999972
gene-UBAP2L|UBAP2L	2889.98	0.0855177	0.0767547	1.11417	0.265207	0.999972
gene-SLC38A2|SLC38A2	3428.99	0.0779129	0.14172	0.549765	0.58248	0.999972
gene-TPM1|TPM1	3751.28	-0.159479	0.154153	-1.03455	0.300879	0.999972
gene-EPB41|EPB41	3032.42	0.0800154	0.104365	0.766685	0.443269	0.999972
gene-IDH1|IDH1	2279.06	-0.117431	0.236785	-0.495937	0.619939	0.999972
gene-OGA|OGA	2939.53	-0.0521902	0.0688066	-0.758505	0.448149	0.999972
gene-ATP5PD|ATP5PD	2964.77	0.127284	0.101608	1.2527	0.210316	0.999972
gene-DCTN1|DCTN1	2679.56	-0.0444324	0.0904754	-0.491099	0.623357	0.999972
gene-ANKRD12|ANKRD12	2875.24	0.011093	0.109683	0.101138	0.919441	0.999972
gene-ANXA7|ANXA7	2776.67	-0.0995821	0.129464	-0.769188	0.441782	0.999972
gene-NDRG1|NDRG1	2924.2	-0.0215898	0.148153	-0.145726	0.884138	0.999972
gene-PGD|PGD	2784.55	0.226642	0.130922	1.73113	0.0834292	0.999972
gene-KIAA1522|KIAA1522	3103.95	0.106313	0.0848011	1.25367	0.209962	0.999972
gene-DDOST|DDOST	3229.83	0.0295571	0.115144	0.256698	0.797412	0.999972
gene-IGFBP3|IGFBP3	2818.45	-0.547518	0.269114	-2.03452	0.0418994	0.999972
gene-STAT3|STAT3	2537.3	0.143141	0.125622	1.13946	0.254513	0.999972
gene-SMC1A|SMC1A	3359.66	-0.0562824	0.111363	-0.505397	0.61328	0.999972
gene-CTSB|CTSB	3294.03	0.0474771	0.144845	0.327778	0.74308	0.999972
gene-ZNF638|ZNF638	3006.48	0.00467562	0.0719371	0.0649959	0.948177	0.999972
gene-HK1|HK1	3207.57	0.292405	0.167061	1.75029	0.0800684	0.999972
gene-ADAR|ADAR	2649.09	-0.30442	0.161734	-1.88223	0.0598051	0.999972
gene-ARPC5|ARPC5	2619.92	-0.107434	0.125655	-0.854992	0.392555	0.999972
gene-LOC101117542|LOC101117542	2927.79	-0.0425462	0.137897	-0.308535	0.757675	0.999972
gene-CDC42|CDC42	2707.27	-0.0534542	0.109749	-0.487057	0.626218	0.999972
gene-USP19|USP19	2696.44	0.0759988	0.111205	0.683412	0.494347	0.999972
gene-STAT2|STAT2	2435.54	-0.307856	0.125547	-2.45211	0.0142021	0.999972
gene-ZNF664|ZNF664	3192.94	0.0810116	0.101464	0.79843	0.424621	0.999972
gene-ADAM10|ADAM10	2692.93	-0.0751649	0.178966	-0.419996	0.674488	0.999972
gene-ABCC3|ABCC3	2848.63	-0.00164512	0.174142	-0.009447	0.992462	0.999972
gene-ARPC1B|ARPC1B	2451.5	-0.198178	0.139762	-1.41797	0.1562	0.999972
gene-LOC106991840|LOC106991840	2722.52	0.0865568	0.128652	0.672795	0.501077	0.999972
gene-TRA2B|TRA2B	3050.83	-0.140555	0.0929136	-1.51275	0.130344	0.999972
gene-DHCR24|DHCR24	2601.11	-0.203998	0.22232	-0.91759	0.358834	0.999972
gene-LOC101110664|LOC101110664	2833.46	0.0411358	0.108579	0.378856	0.704795	0.999972
gene-CUL4A|CUL4A	2636.69	0.0147601	0.0865353	0.170567	0.864564	0.999972
gene-HSPB1|HSPB1	3509.71	-0.00534949	0.12714	-0.0420754	0.966439	0.999972
gene-USP34|USP34	2843.68	0.0790157	0.0786017	1.00527	0.314768	0.999972
gene-PAFAH1B1|PAFAH1B1	2938.21	0.0615733	0.0465255	1.32343	0.185692	0.999972
gene-FOXP4|FOXP4	2917.46	0.0497584	0.111618	0.445792	0.655748	0.999972
gene-GNPTAB|GNPTAB	2870.81	0.176647	0.125563	1.40684	0.159476	0.999972
gene-ABR|ABR	2789.46	0.0786031	0.131969	0.595617	0.551431	0.999972
gene-RIPK1|RIPK1	2437	-0.0827573	0.118	-0.701335	0.483094	0.999972
gene-CASP7|CASP7	2256.65	-0.0973219	0.183858	-0.529332	0.596575	0.999972
gene-GBA2|GBA2	2739.81	-0.0506038	0.0622846	-0.812461	0.416527	0.999972
gene-LOC105602911|LOC105602911	3554.27	-0.905883	0.522399	-1.73408	0.0829033	0.999972
gene-BAZ2A|BAZ2A	2691.55	0.0876673	0.0845193	1.03725	0.299621	0.999972
gene-VIM|VIM	4594.79	-0.398698	0.311824	-1.2786	0.201039	0.999972
gene-RGMB|RGMB	5016.04	0.311234	0.30042	1.036	0.300204	0.999972
gene-C1GALT1|C1GALT1	2322.51	-0.103879	0.244993	-0.424009	0.671559	0.999972
gene-LOC114112702|LOC114112702	2362.09	0.0926408	0.210512	0.440074	0.659884	0.999972
gene-PI4KA|PI4KA	2781.23	0.0758629	0.0958865	0.791174	0.428842	0.999972
gene-SEC24C|SEC24C	2950.88	0.0233175	0.0524999	0.444144	0.656938	0.999972
gene-LRIG1|LRIG1	3078.96	0.144223	0.204352	0.705759	0.480338	0.999972
gene-EPM2AIP1|EPM2AIP1	2934.04	-0.079767	0.106273	-0.750588	0.452901	0.999972
gene-F11R|F11R	2882.98	-0.105434	0.136782	-0.770822	0.440812	0.999972
gene-TCP1|TCP1	3195.32	0.0181706	0.0803716	0.226082	0.821137	0.999972
gene-OSBPL2|OSBPL2	2394.02	-0.0489545	0.113098	-0.432849	0.665124	0.999972
gene-GTF2I|GTF2I	2992.69	0.117036	0.0865129	1.35281	0.176115	0.999972
gene-ATP6AP1|ATP6AP1	3216.99	0.37007	0.156453	2.36537	0.0180122	0.999972
gene-LOC105609918|LOC105609918	2598.13	0.12059	0.145897	0.826539	0.408498	0.999972
gene-PPP2R5A|PPP2R5A	2503.7	-0.00832213	0.140498	-0.0592329	0.952767	0.999972
gene-RNF10|RNF10	3082.54	0.0791921	0.0772012	1.02579	0.304992	0.999972
gene-LOC121816880|LOC121816880	1839.23	0.261908	0.402931	0.650006	0.515688	0.999972
gene-NFE2L1|NFE2L1	3000.13	0.0200413	0.0920622	0.217693	0.827668	0.999972
gene-AK2|AK2	2663.42	0.00814119	0.0786825	0.103469	0.917591	0.999972
gene-SRPRA|SRPRA	3133.02	0.13106	0.0930496	1.4085	0.158983	0.999972
gene-ACTA2|ACTA2	3609.42	-0.239101	0.193793	-1.2338	0.217279	0.999972
gene-SLC26A9|SLC26A9	3440.88	-0.148918	0.158629	-0.93878	0.347844	0.999972
gene-LOC101113683|LOC101113683	2794.55	-0.0176299	0.118984	-0.14817	0.882209	0.999972
gene-ATP5F1D|ATP5F1D	2952.58	0.197423	0.118499	1.66603	0.0957066	0.999972
gene-PIK3R1|PIK3R1	2734.09	-0.0724525	0.114904	-0.630548	0.528336	0.999972
gene-NCOA4|NCOA4	2761.28	-0.0655167	0.132058	-0.496122	0.619808	0.999972
gene-MORF4L1|MORF4L1	3129.91	0.0089598	0.0764504	0.117198	0.906703	0.999972
gene-DEK|DEK	2902.8	-0.0830486	0.0980143	-0.847311	0.396822	0.999972
gene-MARCKS|MARCKS	2455.19	-0.107468	0.109239	-0.983794	0.325217	0.999972
gene-CCNI|CCNI	2567.33	-0.0209598	0.109324	-0.191722	0.84796	0.999972
gene-TPD52|TPD52	2997.38	0.033663	0.0781815	0.430575	0.666778	0.999972
gene-SRSF11|SRSF11	2817.03	0.0177415	0.0710924	0.249556	0.802931	0.999972
gene-LOC101114038|LOC101114038	3028.29	-0.0859693	0.0729643	-1.17824	0.238702	0.999972
gene-LRBA|LRBA	2459.01	0.220376	0.167294	1.3173	0.187739	0.999972
gene-LOC101108592|LOC101108592	2556.44	0.141688	0.177391	0.798733	0.424445	0.999972
gene-PPP1R15B|PPP1R15B	2989.54	-0.0862428	0.131041	-0.658137	0.51045	0.999972
gene-MBTPS1|MBTPS1	2927.34	0.0111138	0.100741	0.110321	0.912155	0.999972
gene-SLC26A2|SLC26A2	2415.84	-0.324719	0.214333	-1.51502	0.129767	0.999972
gene-ACSL1|ACSL1	3692.09	0.282532	0.183225	1.54199	0.123075	0.999972
gene-HNRNPC|HNRNPC	2754.44	-0.0134845	0.1016	-0.132722	0.894413	0.999972
gene-KIAA1217|KIAA1217	2225.85	0.0320591	0.16824	0.190556	0.848874	0.999972
gene-LRRC1|LRRC1	2424.41	-0.0900413	0.113992	-0.789894	0.42959	0.999972
gene-UBP1|UBP1	2549.55	-0.00766153	0.0983057	-0.0779358	0.937879	0.999972
gene-RAB27A|RAB27A	2615.17	-0.250073	0.290289	-0.861462	0.388984	0.999972
gene-TRPM2|TRPM2	2024.73	-0.451131	0.288518	-1.56361	0.117908	0.999972
gene-ELOA|ELOA	2579.95	0.110236	0.130569	0.84428	0.398513	0.999972
gene-CCT3|CCT3	2815.41	-0.0321008	0.0925402	-0.346885	0.728677	0.999972
gene-EIF1|EIF1	2969.95	0.14886	0.0677423	2.19744	0.027989	0.999972
gene-SARS1|SARS1	3011.39	0.00462669	0.147128	0.0314467	0.974913	0.999972
gene-LOC101123290|LOC101123290	1788.99	-0.423189	0.383554	-1.10334	0.269881	0.999972
gene-NUB1|NUB1	2203.94	-0.0877728	0.114192	-0.76864	0.442107	0.999972
gene-TYK2|TYK2	2576.46	-0.0284194	0.08082	-0.351639	0.725109	0.999972
gene-LSP1|LSP1	2500.62	-0.195651	0.174044	-1.12415	0.260949	0.999972
gene-RAB1B|RAB1B	2733.45	0.0427797	0.0493675	0.866555	0.386186	0.999972
gene-CALM2|CALM2	2833.23	-0.14682	0.144633	-1.01512	0.310047	0.999972
gene-LOC101116886|LOC101116886	2673.93	0.0892605	0.117889	0.757158	0.448955	0.999972
gene-COX5A|COX5A	2842.03	0.235988	0.11715	2.01441	0.0439661	0.999972
gene-LOC114118877|LOC114118877	3261.77	0.555974	0.500861	1.11004	0.266983	0.999972
gene-ELOVL1|ELOVL1	2680.52	-0.0649007	0.112812	-0.5753	0.565088	0.999972
gene-JUN|JUN	3055.56	-0.352456	0.196129	-1.79707	0.0723253	0.999972
gene-UBE4A|UBE4A	2778.6	0.0404737	0.0728517	0.555563	0.57851	0.999972
gene-USP22|USP22	2771.65	0.128088	0.11485	1.11526	0.264738	0.999972
gene-NOP53|NOP53	2583.98	-0.0164231	0.0853954	-0.192318	0.847493	0.999972
gene-NFE2L2|NFE2L2	2815.46	-0.0591492	0.138926	-0.425762	0.670281	0.999972
gene-FTL|FTL	2663.76	-0.175639	0.136246	-1.28913	0.197353	0.999972
gene-UBL3|UBL3	2546.01	-0.0139954	0.154199	-0.0907625	0.927681	0.999972
gene-LOC101102809|LOC101102809	2999.93	-0.0330627	0.109403	-0.302211	0.762491	0.999972
gene-GOT2|GOT2	2655.49	0.139039	0.0811766	1.71279	0.0867504	0.999972
gene-ATP5F1E|ATP5F1E	2795.56	0.0474054	0.121275	0.390891	0.695878	0.999972
gene-EEF1B2|EEF1B2	3399	-0.0133437	0.14575	-0.0915521	0.927054	0.999972
gene-C2H2orf72|C2H2orf72	2354.36	0.256085	0.148165	1.72837	0.0839211	0.999972
gene-RPS13|RPS13	4584.19	0.161563	0.249111	0.648558	0.516624	0.999972
gene-LRRC59|LRRC59	3261.95	-0.0067447	0.156871	-0.0429953	0.965705	0.999972
gene-LOC106990117|LOC106990117	1575.36	-0.900243	0.639235	-1.40831	0.159038	0.999972
gene-PGAP6|PGAP6	2645.86	0.141778	0.105556	1.34315	0.179222	0.999972
gene-LOC101115037|LOC101115037	2973.3	-0.0151373	0.0949391	-0.159443	0.87332	0.999972
gene-PCGF5|PCGF5	2437.02	-0.119958	0.0953001	-1.25874	0.208123	0.999972
gene-EFR3A|EFR3A	2410.5	-0.118033	0.0985177	-1.19809	0.230883	0.999972
gene-PSMB10|PSMB10	1960.69	-0.186386	0.185303	-1.00585	0.31449	0.999972
gene-RAD23B|RAD23B	2742.37	0.0602687	0.0935619	0.644158	0.519473	0.999972
gene-TPR|TPR	2695.05	-0.0262948	0.0777971	-0.337992	0.735369	0.999972
gene-CUL7|CUL7	2974.46	0.0124024	0.0988668	0.125446	0.900171	0.999972
gene-HCFC1|HCFC1	2623.52	0.0239805	0.0913072	0.262635	0.792832	0.999972
gene-SPTLC2|SPTLC2	3082.94	0.0262669	0.139472	0.188331	0.850617	0.999972
gene-ZNFX1|ZNFX1	2459.12	-0.584592	0.296717	-1.9702	0.0488154	0.999972
gene-SF3B2|SF3B2	2703.84	-0.0229752	0.064742	-0.354873	0.722685	0.999972
gene-GSE1|GSE1	2486.76	-0.0966378	0.116936	-0.826417	0.408567	0.999972
gene-MGAT4A|MGAT4A	2644.15	0.257354	0.149581	1.7205	0.0853413	0.999972
gene-TES|TES	2463.87	-0.156864	0.151024	-1.03867	0.298958	0.999972
gene-PSME2|PSME2	2396.02	-0.254433	0.139376	-1.82551	0.0679238	0.999972
gene-LOC121816084|LOC121816084	2777.53	-0.02874	0.0813236	-0.353403	0.723787	0.999972
gene-COPZ1|COPZ1	2810.77	-0.0231813	0.115076	-0.201444	0.840352	0.999972
gene-HERC2|HERC2	2591.14	0.129838	0.120644	1.07621	0.281836	0.999972
gene-LAPTM4B|LAPTM4B	2434.77	-0.250343	0.118227	-2.11748	0.0342188	0.999972
gene-RASIP1|RASIP1	2502.52	-0.224038	0.331022	-0.676805	0.49853	0.999972
gene-LAMB1|LAMB1	3407.38	-0.0526138	0.169142	-0.311062	0.755753	0.999972
gene-DIAPH1|DIAPH1	2669.76	0.0213362	0.0652184	0.327149	0.743555	0.999972
gene-ADAM9|ADAM9	1836.16	-0.045876	0.176455	-0.259986	0.794874	0.999972
gene-KIF13B|KIF13B	2497.36	0.0110138	0.0785981	0.140128	0.888559	0.999972
gene-SEPTIN2|SEPTIN2	2891.85	-0.0473979	0.0850715	-0.557154	0.577422	0.999972
gene-LUC7L3|LUC7L3	2772.1	0.00848811	0.0695855	0.121981	0.902914	0.999972
gene-ACOX1|ACOX1	2788.24	0.0759149	0.0774591	0.980065	0.327054	0.999972
gene-SHC1|SHC1	2834.15	0.0361869	0.0706316	0.512332	0.608419	0.999972
gene-KLF5|KLF5	2607.5	-0.132856	0.184289	-0.720916	0.470961	0.999972
gene-KIAA0513|KIAA0513	2155.67	-0.00111788	0.13388	-0.00834989	0.993338	0.999972
gene-SETD5|SETD5	2780.19	0.103684	0.0499279	2.07668	0.0378315	0.999972
gene-PRSS23|PRSS23	3482.21	-0.18987	0.1806	-1.05133	0.293108	0.999972
gene-RAB14|RAB14	2618.32	0.0773396	0.0541813	1.42742	0.153458	0.999972
gene-VIL1|VIL1	2746.74	-0.145651	0.279785	-0.520583	0.602657	0.999972
gene-LOC101123118|LOC101123118	2729.67	-0.0380639	0.0728237	-0.522685	0.601194	0.999972
gene-RERE|RERE	2668	-0.0184242	0.0658488	-0.279795	0.779634	0.999972
gene-CSNK1D|CSNK1D	2600.12	0.0598389	0.0696835	0.858723	0.390493	0.999972
gene-GAN|GAN	2132.56	0.0399469	0.159699	0.250138	0.80248	0.999972
gene-LMO7|LMO7	2259.82	-0.386947	0.202212	-1.91357	0.0556746	0.999972
gene-TRIM2|TRIM2	2839.29	0.071837	0.22483	0.319517	0.749335	0.999972
gene-NDST1|NDST1	3010.98	0.109979	0.26331	0.41768	0.676181	0.999972
gene-ACO1|ACO1	2582.11	0.264017	0.163258	1.61717	0.105841	0.999972
gene-GAK|GAK	2751.91	0.10157	0.0711839	1.42686	0.153619	0.999972
gene-DERL1|DERL1	2684.59	0.168196	0.0859458	1.957	0.0503475	0.999972
gene-ADD1|ADD1	2684.46	0.000907124	0.0626241	0.0144852	0.988443	0.999972
gene-FKBP4|FKBP4	2963.23	0.0257483	0.102242	0.251836	0.801168	0.999972
gene-ECHS1|ECHS1	3084.51	0.0900216	0.0941183	0.956472	0.338834	0.999972
gene-LOC101105982|LOC101105982	2776.83	-0.0919223	0.147684	-0.622423	0.533663	0.999972
gene-EVL|EVL	2580.93	-0.0334798	0.131077	-0.25542	0.798399	0.999972
gene-DSC2|DSC2	2826.05	-0.302521	0.205923	-1.4691	0.141805	0.999972
gene-FUBP1|FUBP1	2823.8	-0.084287	0.0958903	-0.878994	0.379404	0.999972
gene-RALGAPA2|RALGAPA2	2323.13	0.156034	0.253056	0.6166	0.537498	0.999972
gene-TC2N|TC2N	2268.45	0.0064769	0.119602	0.0541538	0.956813	0.999972
gene-CMTM6|CMTM6	2690.47	-0.00316635	0.0948124	-0.0333959	0.973359	0.999972
gene-LOC114109630|LOC114109630	3975.08	-0.535148	0.357347	-1.49756	0.134248	0.999972
gene-LOC101121621|LOC101121621	2728.96	-0.00547034	0.0630534	-0.0867572	0.930865	0.999972
gene-PAK2|PAK2	2537.71	0.0195094	0.105515	0.184897	0.85331	0.999972
gene-MYO5C|MYO5C	2640.11	-0.183525	0.178089	-1.03052	0.302765	0.999972
gene-STAT6|STAT6	2239.96	-0.109256	0.119503	-0.914251	0.360585	0.999972
gene-KLF3|KLF3	2390.27	-0.00922236	0.180828	-0.0510006	0.959325	0.999972
gene-N4BP1|N4BP1	2455.21	-0.0611248	0.114616	-0.533299	0.593827	0.999972
gene-XPO1|XPO1	2735.49	-0.130536	0.111069	-1.17527	0.239888	0.999972
gene-ARL6IP1|ARL6IP1	2311.81	-0.0910619	0.0893819	-1.0188	0.3083	0.999972
gene-MARCKSL1|MARCKSL1	2223.34	-0.306663	0.149292	-2.05412	0.039964	0.999972
gene-TUBB4B|TUBB4B	3288.92	-0.18876	0.202755	-0.930976	0.351866	0.999972
gene-CTSZ|CTSZ	2327.09	-0.282152	0.209695	-1.34554	0.178452	0.999972
gene-SLTM|SLTM	2464.1	-0.0374888	0.0863015	-0.434394	0.664003	0.999972
gene-LITAF|LITAF	2168.84	-0.12158	0.144477	-0.841518	0.400058	0.999972
gene-ARL1|ARL1	2612.22	0.0144896	0.0780095	0.185741	0.852648	0.999972
gene-GMDS|GMDS	2947.63	0.0646465	0.1606	0.402531	0.687294	0.999972
gene-EIF3H|EIF3H	2472.66	-0.0509633	0.0797119	-0.639343	0.5226	0.999972
gene-SET|SET	2910.64	-0.0420658	0.101771	-0.413339	0.679359	0.999972
gene-FLII|FLII	2585.86	-0.00476073	0.071807	-0.066299	0.94714	0.999972
gene-CYFIP1|CYFIP1	2723.3	0.0255729	0.081877	0.312333	0.754787	0.999972
gene-IPO5|IPO5	2826.35	-0.0138178	0.0911339	-0.151621	0.879486	0.999972
gene-NSD3|NSD3	2598.3	0.0268051	0.0830749	0.322661	0.746952	0.999972
gene-HDGF|HDGF	3132.28	-0.0314061	0.128194	-0.244989	0.806465	0.999972
gene-RAB5B|RAB5B	2668.84	0.0986837	0.0908743	1.08594	0.277507	0.999972
gene-OXCT1|OXCT1	2507.4	0.0529115	0.242852	0.217876	0.827526	0.999972
gene-SRRM1|SRRM1	2673.75	0.010869	0.0621118	0.174991	0.861087	0.999972
gene-LETM1|LETM1	2792.19	0.178022	0.128012	1.39067	0.164325	0.999972
gene-CHCHD2|CHCHD2	2480.99	0.159722	0.110196	1.44943	0.147218	0.999972
gene-ARF3|ARF3	2705.49	0.047812	0.103314	0.462782	0.64352	0.999972
gene-VEGFA|VEGFA	3247.26	0.118478	0.189528	0.625118	0.531894	0.999972
gene-SPCS3|SPCS3	2489.81	-0.173565	0.0880191	-1.9719	0.0486213	0.999972
gene-SIDT1|SIDT1	2120.99	0.0654451	0.167867	0.389862	0.696638	0.999972
gene-CAPZB|CAPZB	2210.22	-0.0261127	0.1015	-0.257267	0.796973	0.999972
gene-TMEM63A|TMEM63A	2278.83	-0.0322451	0.119184	-0.27055	0.786737	0.999972
gene-SUGP2|SUGP2	2603.84	0.0123725	0.101282	0.122159	0.902773	0.999972
gene-UBQLN1|UBQLN1	2605.34	0.067127	0.0629382	1.06655	0.286173	0.999972
gene-TFRC|TFRC	2860.37	0.166601	0.213004	0.782149	0.434127	0.999972
gene-C1R|C1R	2624.1	-0.201522	0.163169	-1.23505	0.216812	0.999972
gene-ARFGEF1|ARFGEF1	2366.95	0.0754475	0.0744589	1.01328	0.310928	0.999972
gene-ANXA4|ANXA4	2411.07	-0.0585127	0.207513	-0.281972	0.777965	0.999972
gene-EIF3K|EIF3K	2294.82	-0.00409257	0.133607	-0.0306314	0.975564	0.999972
gene-ATP5PF|ATP5PF	2397.23	0.0421352	0.133292	0.316112	0.751918	0.999972
gene-LOC106990434|LOC106990434	2701.66	-0.0162461	0.124756	-0.130223	0.89639	0.999972
gene-VMP1|VMP1	2185.32	0.212286	0.130825	1.62268	0.104659	0.999972
gene-TMEM259|TMEM259	2548.13	0.0725227	0.0876151	0.827742	0.407817	0.999972
gene-POSTN|POSTN	3307.22	0.575271	0.304427	1.88968	0.0588005	0.999972
gene-DNAJC10|DNAJC10	2592.43	0.0903635	0.111817	0.808135	0.419013	0.999972
gene-ZFP91|ZFP91	2610.72	0.102026	0.0550481	1.85339	0.063826	0.999972
gene-GBF1|GBF1	2542.68	0.0939219	0.0725868	1.29392	0.195692	0.999972
gene-LOC101113616|LOC101113616	2591.94	0.00212029	0.111643	0.0189918	0.984848	0.999972
gene-MKNK2|MKNK2	2762.54	0.0191301	0.116893	0.163655	0.870003	0.999972
gene-CHD3|CHD3	2535.78	-0.00134234	0.0882518	-0.0152104	0.987864	0.999972
gene-PHC3|PHC3	2170.46	-0.0441565	0.115772	-0.38141	0.702899	0.999972
gene-HSPD1|HSPD1	3114.33	0.0274863	0.131104	0.209653	0.833939	0.999972
gene-MYO18A|MYO18A	2412.78	-0.019642	0.0966596	-0.203208	0.838972	0.999972
gene-TJP2|TJP2	1979.72	-0.149743	0.133352	-1.12291	0.261475	0.999972
gene-EIF3M|EIF3M	2491.32	-0.0110083	0.112376	-0.09796	0.921964	0.999972
gene-SDC4|SDC4	2250.53	0.117667	0.149899	0.784977	0.432467	0.999972
gene-LOC114118386|LOC114118386	3170.06	0.192399	0.231762	0.830156	0.406451	0.999972
gene-UBE2J1|UBE2J1	2423.03	-0.00791982	0.131287	-0.0603245	0.951897	0.999972
gene-DDI2|DDI2	2562.18	0.0182886	0.0887593	0.206047	0.836755	0.999972
gene-CCT7|CCT7	2752.37	0.031533	0.0724191	0.435424	0.663255	0.999972
gene-IDUA|IDUA	2846.84	0.118528	0.166326	0.712623	0.476079	0.999972
gene-CLK1|CLK1	2717.59	-0.101411	0.107755	-0.941127	0.34664	0.999972
gene-TIA1|TIA1	2487.78	-0.0935583	0.0794788	-1.17715	0.239136	0.999972
gene-ZYX|ZYX	2623.78	0.0680197	0.157023	0.433183	0.664882	0.999972
gene-PGAM1|PGAM1	2787.54	0.110731	0.0971989	1.13922	0.254613	0.999972
gene-CLPTM1L|CLPTM1L	2700.22	0.0575097	0.0951999	0.604094	0.545781	0.999972
gene-C20H6orf62|C20H6orf62	2621.52	0.0980913	0.0951048	1.0314	0.302352	0.999972
gene-HDAC1|HDAC1	2502.93	0.0220705	0.0633091	0.348615	0.727378	0.999972
gene-LOC101109268|LOC101109268	1844.02	-0.166079	0.162363	-1.02289	0.306361	0.999972
gene-KIDINS220|KIDINS220	2494.98	-0.0143874	0.0761796	-0.188862	0.850201	0.999972
gene-GALNT10|GALNT10	2017.29	0.0549281	0.15948	0.344421	0.73053	0.999972
gene-RASSF6|RASSF6	2139.23	-0.00590313	0.135905	-0.0434356	0.965354	0.999972
gene-RALGAPB|RALGAPB	2402.83	0.117326	0.137049	0.856088	0.391949	0.999972
gene-SOD1|SOD1	2629.32	0.0701263	0.124605	0.562789	0.573579	0.999972
gene-LRPPRC|LRPPRC	2396.07	0.188625	0.141299	1.33493	0.181898	0.999972
gene-ATP5MC1|ATP5MC1	2680.3	0.0359142	0.181895	0.197444	0.84348	0.999972
gene-AFG3L2|AFG3L2	2632.89	0.198664	0.167231	1.18796	0.234851	0.999972
gene-NARS1|NARS1	2496.03	0.0902059	0.109337	0.825029	0.409355	0.999972
gene-GPX2|GPX2	2818.52	0.62751	0.352799	1.77866	0.0752955	0.999972
gene-NPC2|NPC2	2256.72	-0.190458	0.134647	-1.41449	0.157217	0.999972
gene-CLTB|CLTB	2514.38	-0.177133	0.170199	-1.04074	0.297995	0.999972
gene-DRAM2|DRAM2	2088.83	0.053436	0.132703	0.402674	0.687188	0.999972
gene-SLC45A3|SLC45A3	2709.57	-0.266181	0.260913	-1.02019	0.307638	0.999972
gene-CTTN|CTTN	2545.12	-0.0135349	0.14162	-0.0955715	0.923861	0.999972
gene-SF3B3|SF3B3	2654.95	0.0345526	0.0860372	0.401601	0.687978	0.999972
gene-DENND2B|DENND2B	2221.91	-0.0082772	0.164388	-0.0503515	0.959842	0.999972
gene-PTPRJ|PTPRJ	2052.37	-0.076408	0.126625	-0.603419	0.54623	0.999972
gene-GPT2|GPT2	4431.88	0.521035	0.236249	2.20545	0.0274228	0.999972
gene-KMT2A|KMT2A	2441.05	0.100108	0.138679	0.721869	0.470375	0.999972
gene-LOC106990096|LOC106990096	2597.47	0.215436	0.36244	0.594406	0.552241	0.999972
gene-PLCB3|PLCB3	2200.68	0.0892218	0.148433	0.601092	0.547779	0.999972
gene-GDI2|GDI2	2419.02	0.0304136	0.109117	0.278725	0.780456	0.999972
gene-ZMIZ1|ZMIZ1	2212	-0.0949508	0.106882	-0.888374	0.374339	0.999972
gene-RBBP4|RBBP4	2617.87	-0.0141033	0.0667519	-0.21128	0.832669	0.999972
gene-LOC105607169|LOC105607169	2104.51	-0.148746	0.1896	-0.784528	0.43273	0.999972
gene-SUPT5H|SUPT5H	2510.92	0.0767309	0.080447	0.953807	0.340182	0.999972
gene-AKT1|AKT1	2465.01	0.00484533	0.0919299	0.0527068	0.957966	0.999972
gene-BRD8|BRD8	2407.37	0.0742779	0.0781874	0.949999	0.342113	0.999972
gene-LOC101115926|LOC101115926	2741.64	0.022636	0.110163	0.205477	0.837199	0.999972
gene-SGK2|SGK2	2219.99	0.057057	0.264612	0.215625	0.82928	0.999972
gene-LOC101108696|LOC101108696	1502.21	0.0564199	0.551945	0.10222	0.918582	0.999972
gene-BTF3|BTF3	2641.84	0.0209018	0.0822777	0.254039	0.799465	0.999972
gene-SCARB2|SCARB2	2234.26	-0.0236773	0.114596	-0.206615	0.836311	0.999972
gene-KDM5C|KDM5C	2424.76	0.0731025	0.0636945	1.14771	0.25109	0.999972
gene-ADCY6|ADCY6	3150.99	0.161083	0.164227	0.980855	0.326664	0.999972
gene-ASH1L|ASH1L	2440.58	0.075724	0.0744081	1.01768	0.308828	0.999972
gene-YME1L1|YME1L1	2392.19	-0.0207443	0.0662116	-0.313303	0.754051	0.999972
gene-EPS15|EPS15	2093.02	-0.0687052	0.102146	-0.672615	0.501192	0.999972
gene-ASPH|ASPH	2770.79	0.23372	0.189195	1.23534	0.216704	0.999972
gene-ATP11B|ATP11B	2460.84	0.0821591	0.114938	0.714812	0.474725	0.999972
gene-KCNJ15|KCNJ15	2133.77	-0.0296701	0.290014	-0.102306	0.918514	0.999972
gene-ESRP1|ESRP1	2704.46	0.0544598	0.0800087	0.680673	0.496078	0.999972
gene-LAPTM4A|LAPTM4A	2590.51	-0.0496502	0.0638489	-0.77762	0.436793	0.999972
gene-PUM2|PUM2	2390.23	-0.0648529	0.0674917	-0.960902	0.336601	0.999972
gene-SMARCC2|SMARCC2	2430.62	0.0715135	0.071158	1.005	0.314899	0.999972
gene-ADAM15|ADAM15	1957.99	-0.133912	0.129322	-1.0355	0.300436	0.999972
gene-ACADVL|ACADVL	2877.96	0.176525	0.155277	1.13684	0.255605	0.999972
gene-REEP5|REEP5	3047.42	0.0631978	0.109213	0.578663	0.562817	0.999972
gene-BIRC3|BIRC3	1873.34	-0.221625	0.218797	-1.01292	0.311096	0.999972
gene-MARCHF6|MARCHF6	2697.97	0.0767394	0.0708298	1.08343	0.278616	0.999972
gene-LOC101115252|LOC101115252	2250.59	-0.137364	0.114643	-1.19819	0.230841	0.999972
gene-ANK3|ANK3	2476.06	0.15584	0.191099	0.815493	0.41479	0.999972
gene-SMARCA5|SMARCA5	2438.18	0.0538773	0.0995112	0.541419	0.588219	0.999972
gene-EDEM3|EDEM3	2568.22	0.15675	0.107807	1.454	0.145947	0.999972
gene-FLOT2|FLOT2	2148.96	-0.0171019	0.134116	-0.127516	0.898532	0.999972
gene-WAC|WAC	2489.29	-0.0493031	0.0585334	-0.842307	0.399616	0.999972
gene-CBX5|CBX5	2937.71	-0.173271	0.182217	-0.950905	0.341653	0.999972
gene-CLINT1|CLINT1	2385.64	0.0272605	0.0774562	0.351947	0.724878	0.999972
gene-SFT2D2|SFT2D2	2226.29	0.0363361	0.0967386	0.375612	0.707206	0.999972
gene-ETS1|ETS1	2281.22	-0.168887	0.125721	-1.34334	0.179161	0.999972
gene-PPP4R3B|PPP4R3B	2455.61	0.00297695	0.0735913	0.0404525	0.967732	0.999972
gene-ERAP2|ERAP2	1740.46	-0.0858621	0.198803	-0.431895	0.665818	0.999972
gene-NCKAP1|NCKAP1	2366.36	-0.00342912	0.121601	-0.0281997	0.977503	0.999972
gene-LOC101104843|LOC101104843	2478.29	0.0178113	0.0791226	0.22511	0.821894	0.999972
gene-MPZL2|MPZL2	2192.65	0.0927683	0.158955	0.583615	0.559479	0.999972
gene-DCTN2|DCTN2	2375.23	0.0105696	0.0679423	0.155567	0.876374	0.999972
gene-ENPP4|ENPP4	2257.77	0.15258	0.221899	0.687612	0.491697	0.999972
gene-SLC22A23|SLC22A23	2121.6	0.155063	0.12631	1.22764	0.219582	0.999972
gene-RBM47|RBM47	2359.3	0.18572	0.0779357	2.38299	0.0171725	0.999972
gene-VPS13C|VPS13C	2224.68	-0.183215	0.154325	-1.18721	0.235146	0.999972
gene-CCPG1|CCPG1	2629.83	0.288349	0.161743	1.78276	0.0746254	0.999972
gene-IPO7|IPO7	2551.76	-0.00426604	0.1068	-0.0399442	0.968138	0.999972
gene-SPCS2|SPCS2	2565.17	0.0365649	0.0919289	0.397753	0.690813	0.999972
gene-PTGFRN|PTGFRN	2214.34	-0.0477495	0.146041	-0.32696	0.743698	0.999972
gene-PACSIN2|PACSIN2	2554.12	0.0654602	0.127666	0.512747	0.608128	0.999972
gene-SPEN|SPEN	2261.98	-0.000757796	0.0928532	-0.00816122	0.993488	0.999972
gene-SRRT|SRRT	2448.69	0.0296465	0.0927384	0.319679	0.749211	0.999972
gene-TNRC18|TNRC18	2464.4	-0.0880552	0.101203	-0.870089	0.384252	0.999972
gene-SND1|SND1	2509.58	0.0787069	0.0897247	0.877205	0.380375	0.999972
gene-NFKBIZ|NFKBIZ	1732.14	0.0687029	0.285996	0.240223	0.810157	0.999972
gene-GATA4|GATA4	2321.77	0.0909889	0.0965781	0.942127	0.346127	0.999972
gene-GLYR1|GLYR1	2448.14	0.052286	0.0630331	0.8295	0.406822	0.999972
gene-TMC5|TMC5	1081.98	-0.129289	0.39698	-0.325681	0.744666	0.999972
gene-MBNL1|MBNL1	2142.97	-0.220441	0.144919	-1.52114	0.128225	0.999972
gene-SLC25A39|SLC25A39	2428.7	0.140481	0.116794	1.20281	0.229049	0.999972
gene-ERGIC1|ERGIC1	2622.54	0.202308	0.11626	1.74013	0.0818361	0.999972
gene-KIF12|KIF12	2336.6	0.125268	0.177406	0.706109	0.48012	0.999972
gene-SUN1|SUN1	2318.93	-0.0775442	0.0699705	-1.10824	0.267757	0.999972
gene-NFE2L3|NFE2L3	1383.71	-0.397211	0.243472	-1.63145	0.102796	0.999972
gene-GLP1R|GLP1R	1688.46	-0.185548	0.350894	-0.528788	0.596952	0.999972
gene-LOC114113235|LOC114113235	2475.05	-0.0479665	0.892809	-0.0537254	0.957154	0.999972
gene-ERP29|ERP29	2499.85	-0.018145	0.1133	-0.16015	0.872763	0.999972
gene-LOC101109446|LOC101109446	2446.25	0.0699653	0.0733886	0.953354	0.340411	0.999972
gene-DPP8|DPP8	2299.66	-0.0109613	0.0609665	-0.179791	0.857316	0.999972
gene-ZFC3H1|ZFC3H1	2362.74	-0.0376307	0.0826549	-0.455275	0.648911	0.999972
gene-LOC101104594|LOC101104594	2272.61	-0.0485254	0.0778639	-0.623207	0.533148	0.999972
gene-LOC101103232|LOC101103232	2644.3	0.238951	0.185423	1.28868	0.197509	0.999972
gene-VEZF1|VEZF1	2514.73	-0.00491959	0.0717554	-0.0685605	0.945339	0.999972
gene-CXADR|CXADR	2132.38	-0.135017	0.114552	-1.17865	0.238538	0.999972
gene-UBR5|UBR5	2272.33	0.0663403	0.0859494	0.771853	0.440201	0.999972
gene-SMIM6|SMIM6	2119.96	-0.0237239	0.17148	-0.138348	0.889965	0.999972
gene-LOC101113001|LOC101113001	2317.36	0.109948	0.110577	0.99432	0.320067	0.999972
gene-CLIC3|CLIC3	2250.18	-0.250011	0.168945	-1.47983	0.138918	0.999972
gene-TMPRSS4|TMPRSS4	1632.69	-0.128334	0.246595	-0.520423	0.602769	0.999972
gene-WDR82|WDR82	2459.92	-0.0415017	0.0742084	-0.559259	0.575985	0.999972
gene-IMMT|IMMT	2357.9	0.07085	0.0943577	0.750866	0.452733	0.999972
gene-PRSS8|PRSS8	2453.94	0.202385	0.175959	1.15018	0.25007	0.999972
gene-CGNL1|CGNL1	2163.3	0.126115	0.23127	0.545318	0.585535	0.999972
gene-ACTR1A|ACTR1A	2405.21	0.0688466	0.0590385	1.16613	0.243562	0.999972
gene-DBI|DBI	2086.43	-0.0494902	0.10997	-0.450033	0.652687	0.999972
gene-CCNL2|CCNL2	2636.2	0.0875879	0.0767554	1.14113	0.253816	0.999972
gene-DESI1|DESI1	2413.54	0.168294	0.22937	0.73372	0.463119	0.999972
gene-DUOX2|DUOX2	3230.57	1.22321	0.524051	2.33413	0.0195887	0.999972
gene-NADK|NADK	2812.64	0.122096	0.108418	1.12616	0.2601	0.999972
gene-TRAK1|TRAK1	2242.84	0.117441	0.181276	0.647854	0.517079	0.999972
gene-LOC101120423|LOC101120423	1555.19	-0.228157	0.185689	-1.22871	0.219181	0.999972
gene-EDEM1|EDEM1	2087.47	0.0629621	0.125003	0.503684	0.614483	0.999972
gene-PRELID1|PRELID1	2523.71	0.153203	0.0911761	1.6803	0.0928995	0.999972
gene-TBL1XR1|TBL1XR1	2136.78	-0.11388	0.125556	-0.907006	0.364404	0.999972
gene-NEURL3|NEURL3	993.881	-0.32148	0.573633	-0.560428	0.575187	0.999972
gene-LOC101106970|LOC101106970	1507.07	0.968798	0.803376	1.20591	0.227853	0.999972
gene-ABCC5|ABCC5	2340.22	0.27514	0.115679	2.37847	0.0173846	0.999972
gene-MAVS|MAVS	2247.85	0.149591	0.151206	0.989318	0.322508	0.999972
gene-MMP15|MMP15	2392.53	-0.00438933	0.153285	-0.0286351	0.977156	0.999972
gene-MYO1D|MYO1D	2236.1	0.13202	0.139568	0.945917	0.344191	0.999972
gene-CD59|CD59	2535.07	0.231691	0.138582	1.67187	0.0945506	0.999972
gene-LRP5|LRP5	2038.83	-0.072928	0.125648	-0.580415	0.561635	0.999972
gene-GRN|GRN	2115.83	-0.184571	0.174804	-1.05588	0.291024	0.999972
gene-PPP2R1A|PPP2R1A	2253.73	0.0623246	0.077322	0.80604	0.42022	0.999972
gene-TNRC6B|TNRC6B	2171.28	-0.0238777	0.096153	-0.24833	0.803879	0.999972
gene-SULF2|SULF2	2051.9	-0.261536	0.281707	-0.928398	0.353201	0.999972
gene-ATXN10|ATXN10	2341.87	0.119995	0.0676171	1.77462	0.0759599	0.999972
gene-SDHB|SDHB	2471.79	0.151194	0.0942725	1.6038	0.108759	0.999972
gene-DHX15|DHX15	2332.94	-0.0704275	0.079894	-0.881512	0.378041	0.999972
gene-HMGN1|HMGN1	2694.19	-0.0179128	0.125337	-0.142917	0.886356	0.999972
gene-ALDH6A1|ALDH6A1	2175.38	0.168794	0.271399	0.621939	0.533982	0.999972
gene-SEC31A|SEC31A	2500.05	0.0820985	0.145368	0.564763	0.572235	0.999972
gene-SYNGR2|SYNGR2	2090.73	-0.0492573	0.123734	-0.39809	0.690564	0.999972
gene-MINK1|MINK1	2283.68	-0.0270329	0.0620558	-0.435622	0.663111	0.999972
gene-CNDP2|CNDP2	1882.85	-0.158086	0.121097	-1.30545	0.191741	0.999972
gene-ZNF75D|ZNF75D	2698.59	0.124819	0.123263	1.01263	0.311236	0.999972
gene-FGFR3|FGFR3	2365.29	-0.0226467	0.105052	-0.215577	0.829317	0.999972
gene-TENT5C|TENT5C	3494.04	0.127488	0.326396	0.390592	0.696099	0.999972
gene-IGSF9|IGSF9	2258.47	0.299303	0.312355	0.958217	0.337954	0.999972
gene-FHL2|FHL2	1979.35	-0.034276	0.123164	-0.278295	0.780786	0.999972
gene-NFAT5|NFAT5	2236.86	0.00758645	0.099541	0.0762144	0.939249	0.999972
gene-ARHGEF1|ARHGEF1	2213.06	0.00990965	0.10011	0.0989878	0.921148	0.999972
gene-HNF4A|HNF4A	2177.48	-0.0956236	0.135225	-0.707143	0.479478	0.999972
gene-GCN1|GCN1	2467.46	0.0873981	0.0962455	0.908075	0.363839	0.999972
gene-ZBTB7B|ZBTB7B	2547.99	0.0354633	0.11406	0.310917	0.755864	0.999972
gene-LOC101108935|LOC101108935	2500.78	0.0634167	0.102809	0.616839	0.537341	0.999972
gene-LOC101122142|LOC101122142	1168.84	-0.645095	0.373531	-1.72702	0.0841649	0.999972
gene-MFN2|MFN2	2354.28	0.142489	0.0956352	1.48992	0.136245	0.999972
gene-EML4|EML4	2438.04	0.054991	0.137297	0.400525	0.68877	0.999972
gene-PHB|PHB	2599.69	0.0413911	0.107827	0.383867	0.701077	0.999972
gene-UBE2H|UBE2H	2476.5	0.21904	0.123783	1.76954	0.0768032	0.999972
gene-MX1|MX1	3378.06	-0.859103	0.665614	-1.29069	0.19681	0.999972
gene-RPL38|RPL38	2632.45	0.0183789	0.119996	0.153163	0.87827	0.999972
gene-SURF4|SURF4	2326.2	0.025519	0.134817	0.189286	0.849869	0.999972
gene-EP300|EP300	2181.08	0.0337999	0.0803859	0.420471	0.674142	0.999972
gene-IGF2R|IGF2R	2071.01	0.205619	0.148324	1.38629	0.16566	0.999972
gene-SCD|SCD	2452.53	-0.155888	0.2951	-0.528253	0.597324	0.999972
gene-EIF3G|EIF3G	2258.38	-0.032182	0.0816494	-0.394148	0.693472	0.999972
gene-AFF4|AFF4	2310.35	0.0935826	0.107498	0.87055	0.384	0.999972
gene-EFCAB14|EFCAB14	2307.73	-0.145038	0.177377	-0.817679	0.41354	0.999972
gene-LOC101103618|LOC101103618	2242.87	0.0183819	0.0844932	0.217554	0.827776	0.999972
gene-KPNA6|KPNA6	2213.58	0.0889049	0.0835305	1.06434	0.287174	0.999972
gene-ADGRG1|ADGRG1	2229.22	0.0233063	0.0996233	0.233944	0.815028	0.999972
gene-DGKZ|DGKZ	2075.42	-0.170747	0.0811874	-2.10312	0.0354549	0.999972
gene-HTT|HTT	2044.6	-0.0286518	0.126612	-0.226297	0.820971	0.999972
gene-SRC|SRC	2202.91	-0.00637029	0.0733226	-0.0868802	0.930767	0.999972
gene-TJP1|TJP1	2421.55	0.079129	0.0842314	0.939424	0.347513	0.999972
gene-DCN|DCN	2576.83	-0.395345	0.224978	-1.75726	0.0788729	0.999972
gene-LAMA5|LAMA5	2196.47	0.149856	0.110287	1.35878	0.174215	0.999972
gene-ITGAV|ITGAV	2379.02	0.132763	0.115017	1.1543	0.248379	0.999972
gene-SRSF5|SRSF5	2176.87	-0.0871662	0.056955	-1.53044	0.125908	0.999972
gene-ASXL1|ASXL1	2445.37	0.0592445	0.120643	0.491074	0.623374	0.999972
gene-SCAF11|SCAF11	2084.21	-0.0444695	0.0842713	-0.527694	0.597711	0.999972
gene-GOLGA2|GOLGA2	2487.03	0.0467043	0.0799492	0.584174	0.559103	0.999972
gene-LONP2|LONP2	2464.1	0.0686558	0.0556686	1.23329	0.217466	0.999972
gene-LOC101111878|LOC101111878	2864.35	0.116923	0.142711	0.8193	0.412615	0.999972
gene-TMEM131|TMEM131	2190.44	0.071883	0.119597	0.601043	0.547811	0.999972
gene-EPB41L1|EPB41L1	2080.84	0.102891	0.103732	0.991893	0.32125	0.999972
gene-IST1|IST1	2136.81	-0.0853964	0.0742255	-1.1505	0.249938	0.999972
gene-LOC101111888|LOC101111888	2142.5	-0.0544381	0.105846	-0.514312	0.607034	0.999972
gene-KTN1|KTN1	2414.15	0.0951185	0.0794253	1.19758	0.231079	0.999972
gene-CALD1|CALD1	2484.99	-0.113422	0.163027	-0.695728	0.486599	0.999972
gene-CHD2|CHD2	2314.53	0.121606	0.0794908	1.52981	0.126063	0.999972
gene-LOC101114075|LOC101114075	2009.09	-0.286742	0.254781	-1.12544	0.260401	0.999972
gene-ARMCX3|ARMCX3	2462.84	0.113435	0.092533	1.22589	0.22024	0.999972
gene-ANKRD17|ANKRD17	2252.83	0.0930724	0.0842877	1.10422	0.269496	0.999972
gene-POLDIP3|POLDIP3	2390.33	0.0326959	0.0418412	0.781427	0.434551	0.999972
gene-TMPO|TMPO	2337.8	-0.103536	0.122819	-0.842994	0.399232	0.999972
gene-TXN|TXN	2221.26	-0.0448191	0.152565	-0.293772	0.768932	0.999972
gene-LOC114109091|LOC114109091	2307.08	0.00484638	0.302985	0.0159954	0.987238	0.999972
gene-VPS13D|VPS13D	2096.52	0.0997073	0.117455	0.848896	0.395939	0.999972
gene-HNRNPK|HNRNPK	2275.38	-0.131464	0.0745473	-1.7635	0.0778167	0.999972
gene-TENT5A|TENT5A	2232.5	-0.728982	0.30601	-2.38221	0.0172089	0.999972
gene-KEF53_t22	2444.25	0.191485	0.196646	0.973758	0.330177	0.999972
gene-GALNT7|GALNT7	2293.26	-0.11457	0.21351	-0.536599	0.591544	0.999972
gene-SDHC|SDHC	2593.96	0.175603	0.0925133	1.89814	0.0576779	0.999972
gene-CAPN1|CAPN1	2165.51	-0.0188509	0.104467	-0.180448	0.856801	0.999972
gene-RAB7A|RAB7A	2333.01	0.0146803	0.0814357	0.180268	0.856942	0.999972
gene-TET2|TET2	2204.36	0.0121608	0.112577	0.108022	0.913979	0.999972
gene-TOP2A|TOP2A	2368.65	-0.26466	0.251606	-1.05188	0.292854	0.999972
gene-NUMB|NUMB	1895.67	0.0226365	0.133777	0.16921	0.865631	0.999972
gene-EVPL|EVPL	2274.9	-0.12448	0.226859	-0.54871	0.583205	0.999972
gene-STARD10|STARD10	2319.42	0.0587246	0.129793	0.452446	0.650947	0.999972
gene-MYH14|MYH14	2468.71	-0.212623	0.22231	-0.956426	0.338857	0.999972
gene-ARHGEF12|ARHGEF12	2165.09	0.121482	0.0975024	1.24594	0.212787	0.999972
gene-DCAF7|DCAF7	2205.95	0.0598072	0.0947262	0.631369	0.5278	0.999972
gene-LLGL2|LLGL2	2334.66	0.0410941	0.122954	0.334224	0.73821	0.999972
gene-LOC106990092|LOC106990092	2279.89	0.270345	0.167437	1.6146	0.106396	0.999972
gene-TBL1X|TBL1X	2468.21	0.130319	0.0651937	1.99895	0.0456137	0.999972
gene-LOC114117226|LOC114117226	2042.26	-0.0649183	0.165898	-0.391313	0.695566	0.999972
gene-COL4A2|COL4A2	2542.98	0.0497545	0.19204	0.259084	0.795571	0.999972
gene-LOC101118433|LOC101118433	2179.21	-0.106292	0.122863	-0.865126	0.38697	0.999972
gene-ARFGEF2|ARFGEF2	2221.54	0.135752	0.169175	0.802439	0.422299	0.999972
gene-BAK1|BAK1	1870.31	0.0814027	0.134014	0.607419	0.543573	0.999972
gene-HSPG2|HSPG2	3087.11	0.0956328	0.184875	0.517283	0.604959	0.999972
gene-DDX31|DDX31	2143.77	0.0032029	0.0851978	0.0375937	0.970012	0.999972
gene-LOC114114906|LOC114114906	2841.06	0.105054	0.166	0.632856	0.526827	0.999972
gene-ADGRG7|ADGRG7	1626.07	-0.0121132	0.223855	-0.0541119	0.956846	0.999972
gene-SORT1|SORT1	2498.19	0.223758	0.112629	1.98668	0.0469578	0.999972
gene-RALY|RALY	2322.13	-0.0695431	0.0946821	-0.73449	0.46265	0.999972
gene-USO1|USO1	2424.81	-0.0275589	0.118231	-0.233094	0.815689	0.999972
gene-EMP1|EMP1	2443.69	-0.436742	0.320508	-1.36265	0.172992	0.999972
gene-SEC23B|SEC23B	2396.54	0.102744	0.111132	0.924522	0.355215	0.999972
gene-GALNT6|GALNT6	2076.55	-0.00387134	0.308064	-0.0125667	0.989974	0.999972
gene-GCC2|GCC2	1956.74	-0.000527769	0.0930776	-0.00567021	0.995476	0.999972
gene-AMFR|AMFR	2173.76	0.0119701	0.0648276	0.184645	0.853507	0.999972
gene-CDH16|CDH16	3308.27	0.304626	1.20355	0.253107	0.800186	0.999972
gene-RBM10|RBM10	2361.23	0.0224005	0.062287	0.359634	0.719121	0.999972
gene-R3HDM4|R3HDM4	2151.04	-0.0834298	0.109257	-0.763608	0.445101	0.999972
gene-CDH17|CDH17	2475.45	-0.562841	0.387699	-1.45175	0.146572	0.999972
gene-CRAT|CRAT	2016.57	0.105023	0.121493	0.864436	0.387349	0.999972
gene-ECPAS|ECPAS	1964.23	-0.0460045	0.102903	-0.447067	0.654826	0.999972
gene-SP1|SP1	2301.59	-0.0868426	0.0797592	-1.08881	0.276238	0.999972
gene-LOC101111247|LOC101111247	2415.81	0.0550115	0.0755953	0.727711	0.466791	0.999972
gene-NCOA3|NCOA3	1974.79	-0.100561	0.104551	-0.96184	0.33613	0.999972
gene-LOC101122715|LOC101122715	2329.45	0.167213	0.0741412	2.25534	0.0241121	0.999972
gene-PDGFA|PDGFA	2870.25	0.192631	0.276501	0.696674	0.486007	0.999972
gene-SERINC1|SERINC1	2281.38	0.0508773	0.0844599	0.602384	0.546919	0.999972
gene-KLF4|KLF4	2321.1	-0.138853	0.230643	-0.602028	0.547156	0.999972
gene-LMAN2|LMAN2	2235.8	-0.0266572	0.0790317	-0.337297	0.735893	0.999972
gene-SNX5|SNX5	2205.73	0.0610663	0.0730199	0.836297	0.402988	0.999972
gene-TARS1|TARS1	2362.23	-0.0564419	0.153936	-0.366659	0.713873	0.999972
gene-SBF1|SBF1	2211.42	-0.0324701	0.0842054	-0.385606	0.699788	0.999972
gene-LOC101122880|LOC101122880	1878.13	-0.0743089	0.267476	-0.277816	0.781154	0.999972
gene-ZC3HAV1|ZC3HAV1	2026.37	-0.204878	0.157286	-1.30259	0.192716	0.999972
gene-IVD|IVD	1984.91	-0.155368	0.12688	-1.22452	0.220755	0.999972
gene-SBNO2|SBNO2	1805.12	0.0415727	0.123287	0.337203	0.735964	0.999972
gene-RETREG2|RETREG2	2306.44	0.0704802	0.0845974	0.833125	0.404774	0.999972
gene-TNFRSF21|TNFRSF21	1736.09	0.25682	0.160559	1.59954	0.109702	0.999972
gene-ZC3H7A|ZC3H7A	2081.17	-0.086613	0.122042	-0.709701	0.47789	0.999972
gene-CAMTA2|CAMTA2	2148.41	0.0265173	0.0939579	0.282226	0.777771	0.999972
gene-LOC101121602|LOC101121602	2162.96	0.0705772	0.067391	1.04728	0.294971	0.999972
gene-ZDHHC20|ZDHHC20	2092.33	0.0128269	0.115384	0.111168	0.911483	0.999972
gene-MTOR|MTOR	2115.68	0.114742	0.0875009	1.31132	0.189749	0.999972
gene-PLPP2|PLPP2	1774.22	-0.0410521	0.125755	-0.326445	0.744088	0.999972
gene-FAM83H|FAM83H	2146.08	-0.0778574	0.101518	-0.766933	0.443121	0.999972
gene-RNF214|RNF214	2119.71	0.0188528	0.132139	0.142674	0.886548	0.999972
gene-MMUT|MMUT	1815.53	-0.0693512	0.110172	-0.629479	0.529035	0.999972
gene-TRAM2|TRAM2	2455.47	0.307466	0.144566	2.12682	0.0334349	0.999972
gene-LOC114108603|LOC114108603	45132.6	0.911108	1.0035	0.90793	0.363915	0.999972
gene-DBNL|DBNL	2081.62	0.0244019	0.068765	0.354859	0.722695	0.999972
gene-LOC114117878|LOC114117878	1380.06	-0.0993417	0.261701	-0.3796	0.704242	0.999972
gene-PPP2CA|PPP2CA	2176.66	-0.0789522	0.104088	-0.758517	0.448141	0.999972
gene-ARHGAP21|ARHGAP21	2000.68	-0.0741179	0.110759	-0.669179	0.503381	0.999972
gene-GOLGA3|GOLGA3	2338.15	0.15762	0.0965392	1.6327	0.102532	0.999972
gene-PIK3C2B|PIK3C2B	2055.29	-0.0939493	0.15494	-0.606358	0.544277	0.999972
gene-IARS1|IARS1	2170.21	0.146512	0.13923	1.0523	0.292663	0.999972
gene-FNBP1L|FNBP1L	2313.74	0.0446473	0.135792	0.328792	0.742313	0.999972
gene-SNRNP70|SNRNP70	2413.04	0.0414446	0.118576	0.34952	0.726699	0.999972
gene-ACAT1|ACAT1	2310.86	0.112532	0.0808561	1.39175	0.163997	0.999972
gene-PRKCI|PRKCI	1588.9	-0.0694875	0.172017	-0.403958	0.686244	0.999972
gene-LOC101109426|LOC101109426	1896.44	-0.069754	0.0874052	-0.798053	0.42484	0.999972
gene-LOC101117758|LOC101117758	2021.98	-0.0615686	0.117021	-0.52613	0.598798	0.999972
gene-IARS2|IARS2	2227.25	0.0690419	0.0923497	0.747613	0.454694	0.999972
gene-AGRN|AGRN	2438.69	-0.00401082	0.167472	-0.0239491	0.980893	0.999972
gene-NECTIN2|NECTIN2	2091.35	0.0992537	0.0774573	1.2814	0.200054	0.999972
gene-ASXL2|ASXL2	2053.18	0.00265789	0.0724948	0.0366631	0.970754	0.999972
gene-PPDPF|PPDPF	2296.66	-0.053398	0.0848849	-0.629064	0.529307	0.999972
gene-CDK16|CDK16	2261.5	0.128973	0.0717074	1.7986	0.0720812	0.999972
gene-IDH3B|IDH3B	1999.58	0.0566655	0.13594	0.416842	0.676794	0.999972
gene-C2CD5|C2CD5	2030.73	-0.0857185	0.119229	-0.718942	0.472176	0.999972
gene-AP2M1|AP2M1	2354.54	-0.0455179	0.0945273	-0.481532	0.630138	0.999972
gene-CCNY|CCNY	2393.46	0.214525	0.0964098	2.22513	0.0260724	0.999972
gene-TCAF1|TCAF1	2406.26	0.256374	0.123931	2.06869	0.0385753	0.999972
gene-UBE2Z|UBE2Z	1886.5	-0.046482	0.0873182	-0.53233	0.594498	0.999972
gene-KLF6|KLF6	1954.21	-0.151383	0.137958	-1.09731	0.272506	0.999972
gene-MAGT1|MAGT1	2178.33	-0.1411	0.108865	-1.2961	0.19494	0.999972
gene-MOB1A|MOB1A	1989.31	-0.0970859	0.118036	-0.82251	0.410787	0.999972
gene-LOC101110066|LOC101110066	1906.06	0.0896513	0.160432	0.55881	0.576291	0.999972
gene-LCP1|LCP1	1610.1	-0.232245	0.27516	-0.844036	0.39865	0.999972
gene-AK3|AK3	1831.58	0.0470985	0.245975	0.191477	0.848152	0.999972
gene-NPEPPS|NPEPPS	1975.4	-0.0888509	0.0903982	-0.982884	0.325664	0.999972
gene-ARHGEF2|ARHGEF2	2058.07	-0.168636	0.137151	-1.22956	0.218862	0.999972
gene-NIPBL|NIPBL	2072.94	0.0269065	0.0684853	0.39288	0.694408	0.999972
gene-HMGCR|HMGCR	2230.52	-0.245669	0.245963	-0.998805	0.317889	0.999972
gene-IL6ST|IL6ST	2317.79	0.0430197	0.123888	0.347246	0.728407	0.999972
gene-GAPVD1|GAPVD1	1977.52	0.0120003	0.063203	0.189869	0.849412	0.999972
gene-MYO9B|MYO9B	1806.56	-0.0605047	0.117538	-0.514768	0.606715	0.999972
gene-LOC105602066|LOC105602066	1783.06	0.178483	0.196283	0.909318	0.363182	0.999972
gene-SEL1L3|SEL1L3	2364.93	0.183289	0.147816	1.23998	0.214983	0.999972
gene-PRKCSH|PRKCSH	2239.45	0.0112468	0.079076	0.142228	0.8869	0.999972
gene-TMEM30A|TMEM30A	2195.93	0.0144461	0.0642941	0.224688	0.822222	0.999972
gene-FKBP8|FKBP8	2137.51	-0.0283208	0.074824	-0.378498	0.70506	0.999972
gene-ATP7B|ATP7B	1667.03	-0.0625584	0.706346	-0.0885663	0.929427	0.999972
gene-SUSD4|SUSD4	2566.71	-0.294076	0.275021	-1.06928	0.284942	0.999972
gene-USP47|USP47	2082.24	0.0653204	0.0862087	0.7577	0.44863	0.999972
gene-ARPC3|ARPC3	1861.71	-0.0839924	0.120021	-0.699817	0.484042	0.999972
gene-RSRP1|RSRP1	2138.96	-0.0316478	0.0933414	-0.339055	0.734569	0.999972
gene-TUBA1A|TUBA1A	2755.45	-0.243089	0.20463	-1.18794	0.234855	0.999972
gene-USP32|USP32	1778.88	0.165564	0.196762	0.841444	0.400099	0.999972
gene-ZNF207|ZNF207	2087.27	-0.03763	0.0881401	-0.426934	0.669427	0.999972
gene-MAN2B1|MAN2B1	2139.03	-0.148487	0.108157	-1.37288	0.169791	0.999972
gene-PAN3|PAN3	1855.72	-0.0306171	0.102042	-0.300044	0.764143	0.999972
gene-ABHD16A|ABHD16A	1955.61	-0.0561244	0.0987191	-0.568527	0.569677	0.999972
gene-RAB11A|RAB11A	2055.83	0.0632815	0.0698559	0.905887	0.364996	0.999972
gene-PPT1|PPT1	2080.44	-0.0784006	0.0998531	-0.78516	0.43236	0.999972
gene-EIF3D|EIF3D	2011.52	-0.0560634	0.0973089	-0.576138	0.564522	0.999972
gene-LOC121816883|LOC121816883	2997.03	-0.19207	0.589084	-0.326049	0.744388	0.999972
gene-CCND1|CCND1	1929.05	-0.125618	0.105855	-1.1867	0.235347	0.999972
gene-SCNN1A|SCNN1A	2440.37	-0.0268819	0.168204	-0.159817	0.873025	0.999972
gene-MAPK1|MAPK1	2111.46	0.0723262	0.078111	0.925941	0.354477	0.999972
gene-PABPC4|PABPC4	2514.59	0.310495	0.156801	1.98019	0.0476825	0.999972
gene-GLRX|GLRX	2535.01	0.0650528	0.176669	0.368218	0.712711	0.999972
gene-LOC101118481|LOC101118481	2337.17	-0.013852	0.0929695	-0.148995	0.881558	0.999972
gene-RAB3GAP2|RAB3GAP2	2080.39	0.0226802	0.0690737	0.328348	0.742649	0.999972
gene-PLEKHB2|PLEKHB2	1916.88	-0.00500866	0.09543	-0.0524852	0.958142	0.999972
gene-SEC61B|SEC61B	1702.13	-0.0972859	0.132211	-0.735841	0.461828	0.999972
gene-GNS|GNS	1924.89	-0.047062	0.117027	-0.402147	0.687576	0.999972
gene-AARS1|AARS1	2298.07	0.0858192	0.106345	0.806986	0.419675	0.999972
gene-SIK2|SIK2	2176.96	0.0770657	0.0840149	0.917286	0.358993	0.999972
gene-SYNRG|SYNRG	2046.43	0.102318	0.0932267	1.09752	0.272415	0.999972
gene-ZFP36L1|ZFP36L1	2176.18	-0.142338	0.122712	-1.15993	0.246076	0.999972
gene-FDPS|FDPS	1726.16	-0.280286	0.278836	-1.0052	0.314802	0.999972
gene-SUMO2|SUMO2	2172.66	-0.10224	0.0802338	-1.27427	0.202567	0.999972
gene-IHH|IHH	1568.9	-0.198805	0.149805	-1.32709	0.184478	0.999972
gene-ZZEF1|ZZEF1	1917.54	0.148997	0.126414	1.17864	0.238543	0.999972
gene-RAB2A|RAB2A	2252.48	0.0288844	0.0796386	0.362694	0.716834	0.999972
gene-EIF3B|EIF3B	2388.3	0.0548804	0.0974572	0.563123	0.573351	0.999972
gene-ZMYND11|ZMYND11	2090.23	-0.0638975	0.0774451	-0.825069	0.409332	0.999972
gene-ECHDC1|ECHDC1	2180.27	0.0472393	0.0810564	0.582795	0.560031	0.999972
gene-LOC101112441|LOC101112441	1983.16	0.0909176	0.107787	0.843493	0.398953	0.999972
gene-QARS1|QARS1	2137.15	0.0526539	0.0549657	0.95794	0.338093	0.999972
gene-SETD2|SETD2	2026.05	0.0352339	0.0733314	0.480475	0.630889	0.999972
gene-TRAF7|TRAF7	1972.32	0.019053	0.073737	0.258392	0.796104	0.999972
gene-LOC101103351|LOC101103351	2139.76	-0.0204735	0.0942647	-0.217192	0.828059	0.999972
gene-PPP4R3A|PPP4R3A	2207.9	0.00859578	0.0763449	0.112591	0.910354	0.999972
gene-LOC114114996|LOC114114996	1894.15	-0.347426	0.160886	-2.15946	0.0308145	0.999972
gene-MTDH|MTDH	2239.5	0.0657443	0.093599	0.702404	0.482427	0.999972
gene-ETHE1|ETHE1	2176.55	-0.109981	0.162007	-0.678864	0.497224	0.999972
gene-PRKCD|PRKCD	1685.66	-0.0620879	0.115833	-0.536014	0.591949	0.999972
gene-LOC101106288|LOC101106288	2342.83	-0.0744055	0.192431	-0.386662	0.699007	0.999972
gene-GSPT1|GSPT1	2240.7	0.101472	0.0908713	1.11665	0.264142	0.999972
gene-MSN|MSN	2084.29	0.0146436	0.0832005	0.176004	0.860291	0.999972
gene-LOC101104237|LOC101104237	1629.5	0.0891731	0.244903	0.364116	0.715772	0.999972
gene-BANF1|BANF1	2172.87	-0.102711	0.0842014	-1.21983	0.22253	0.999972
gene-PDS5A|PDS5A	2064.8	-0.00501756	0.0636293	-0.0788562	0.937147	0.999972
gene-CCT8|CCT8	2288.4	0.00742737	0.110378	0.0672902	0.946351	0.999972
gene-MDC1|MDC1	1943.18	-0.0126166	0.0856731	-0.147264	0.882924	0.999972
gene-JPT2|JPT2	2160.5	0.00637971	0.108149	0.0589902	0.95296	0.999972
gene-FNDC3B|FNDC3B	2742.62	0.305055	0.147796	2.06403	0.0390153	0.999972
gene-HERC6|HERC6	2309.41	-0.696596	0.380452	-1.83097	0.0671054	0.999972
gene-ELK4|ELK4	1673.3	-0.151616	0.111461	-1.36026	0.173749	0.999972
gene-EP400|EP400	1972.78	0.086994	0.0697003	1.24812	0.211989	0.999972
gene-SUN2|SUN2	1991.13	-0.141048	0.123519	-1.14191	0.253491	0.999972
gene-UBTF|UBTF	2109.52	-0.0198666	0.0568972	-0.349167	0.726964	0.999972
gene-EIF5B|EIF5B	2289.92	0.00587597	0.067356	0.0872375	0.930483	0.999972
gene-COMT|COMT	2300.53	0.224176	0.108089	2.074	0.0380796	0.999972
gene-PPP1CA|PPP1CA	1991.99	-0.0100422	0.0639957	-0.156919	0.875308	0.999972
gene-LOC101123600|LOC101123600	2043.28	0.0909469	0.104291	0.872048	0.383182	0.999972
gene-FRY|FRY	1529.36	-0.0300931	0.152274	-0.197624	0.843339	0.999972
gene-DTX4|DTX4	1767.46	-0.240602	0.119258	-2.0175	0.0436437	0.999972
gene-SUPT6H|SUPT6H	2105.09	0.154277	0.0832814	1.85248	0.063957	0.999972
gene-EXOC3|EXOC3	2219.22	0.0547881	0.089287	0.613617	0.539468	0.999972
gene-GPX1|GPX1	2368.47	-0.188482	0.105533	-1.78601	0.0740973	0.999972
gene-TSPAN15|TSPAN15	1747.87	-0.0128624	0.178709	-0.0719741	0.942622	0.999972
gene-GALNT12|GALNT12	1724.07	-0.0704292	0.135445	-0.519983	0.603076	0.999972
gene-PYGL|PYGL	2221.54	-0.109544	0.126912	-0.863148	0.388056	0.999972
gene-RAP1GAP2|RAP1GAP2	2541.39	0.127071	0.307396	0.41338	0.679328	0.999972
gene-EXOG|EXOG	2054.28	0.0364231	0.115828	0.314459	0.753172	0.999972
gene-NDRG2|NDRG2	2780.5	0.311197	0.150513	2.06757	0.0386806	0.999972
gene-CCT4|CCT4	2236.87	-0.0537939	0.101118	-0.53199	0.594733	0.999972
gene-HSPA4|HSPA4	2402.99	0.0597489	0.122493	0.487773	0.625711	0.999972
gene-ESYT2|ESYT2	2063.44	-0.00582054	0.0853506	-0.0681957	0.94563	0.999972
gene-PPARGC1B|PPARGC1B	1832.2	0.392656	0.229237	1.71289	0.0867335	0.999972
gene-SEMA3C|SEMA3C	1929.94	-0.103963	0.136237	-0.763105	0.445401	0.999972
gene-NUFIP2|NUFIP2	2018.91	-0.156352	0.118396	-1.32059	0.186639	0.999972
gene-GALE|GALE	2256.81	-0.0842182	0.210075	-0.400896	0.688496	0.999972
gene-LAMC2|LAMC2	1599.21	-0.338501	0.213638	-1.58446	0.113089	0.999972
gene-COPB1|COPB1	2263.53	-0.0460215	0.123685	-0.372085	0.70983	0.999972
gene-PIGO|PIGO	1790.84	-0.0156128	0.0959088	-0.162788	0.870685	0.999972
gene-SAFB2|SAFB2	2079.9	0.0340513	0.0719252	0.473427	0.635909	0.999972
gene-GNB2|GNB2	2137.37	-0.00324354	0.0906769	-0.0357702	0.971466	0.999972
gene-TMEM214|TMEM214	2316.82	0.0626768	0.099041	0.632837	0.52684	0.999972
gene-FYCO1|FYCO1	2120.98	0.121433	0.122867	0.988329	0.322992	0.999972
gene-IRF6|IRF6	1897.27	0.0706277	0.0859547	0.821685	0.411256	0.999972
gene-DOCK1|DOCK1	2048.87	-0.135047	0.114627	-1.17814	0.23874	0.999972
gene-TMEM184A|TMEM184A	1870.02	0.0239243	0.11911	0.200858	0.840809	0.999972
gene-NCSTN|NCSTN	2004.59	0.161697	0.0812904	1.98913	0.0466871	0.999972
gene-CLTA|CLTA	2100.19	0.0340371	0.0527902	0.644762	0.519081	0.999972
gene-OTUD5|OTUD5	2130.1	0.0389433	0.0864128	0.450666	0.65223	0.999972
gene-MX2|MX2	2198.04	-1.15445	0.746659	-1.54615	0.122069	0.999972
gene-DENND4C|DENND4C	1832.57	0.0614351	0.116729	0.526307	0.598675	0.999972
gene-UBXN4|UBXN4	2044.39	-0.0279626	0.0448621	-0.6233	0.533087	0.999972
gene-PLEKHB1|PLEKHB1	1781.2	0.272722	0.224038	1.2173	0.22349	0.999972
gene-AKAP1|AKAP1	1920.24	0.0558951	0.122766	0.455298	0.648895	0.999972
gene-CGGBP1|CGGBP1	2029.97	-0.0898945	0.0847237	-1.06103	0.288675	0.999972
gene-AUP1|AUP1	2153.22	0.00915831	0.0720558	0.1271	0.898861	0.999972
gene-LOC121816989|LOC121816989	2149.45	0.145122	0.345369	0.420196	0.674343	0.999972
gene-TFG|TFG	1742.19	-0.0264219	0.130884	-0.201873	0.840016	0.999972
gene-GNA13|GNA13	1931.19	-0.0658058	0.10798	-0.609424	0.542243	0.999972
gene-TASOR2|TASOR2	2040.2	0.028469	0.0810724	0.351155	0.725472	0.999972
gene-LOC101115117|LOC101115117	1881.23	-0.0244434	0.128725	-0.189888	0.849397	0.999972
gene-CASZ1|CASZ1	1716.49	0.113563	0.184353	0.616007	0.53789	0.999972
gene-PTGES3|PTGES3	2353.32	-0.0197005	0.0922891	-0.213466	0.830964	0.999972
gene-S100A14|S100A14	2195.42	-0.111563	0.185679	-0.600841	0.547946	0.999972
gene-PLCG1|PLCG1	1972.34	0.112562	0.131587	0.855417	0.39232	0.999972
gene-SCAMP2|SCAMP2	2180.68	0.00615577	0.122503	0.05025	0.959923	0.999972
gene-CEP350|CEP350	2056.18	0.0406157	0.109449	0.371094	0.710567	0.999972
gene-MGRN1|MGRN1	1783.18	0.0701152	0.12909	0.543148	0.587028	0.999972
gene-CDHR2|CDHR2	1627.68	0.171487	0.282858	0.606265	0.544339	0.999972
gene-APOE|APOE	2236.55	-0.181778	0.211765	-0.858395	0.390675	0.999972
gene-LOC114118416|LOC114118416	1741.03	-0.45645	0.251593	-1.81424	0.0696405	0.999972
gene-PDCD4|PDCD4	2119.92	0.13458	0.113005	1.19092	0.233684	0.999972
gene-IGDCC4|IGDCC4	1459.04	-0.171603	0.24322	-0.705545	0.480471	0.999972
gene-TAX1BP1|TAX1BP1	1930.85	-0.165299	0.0846203	-1.95342	0.0507695	0.999972
gene-XPC|XPC	2182.67	0.0328067	0.0861235	0.380926	0.703258	0.999972
gene-TOB2|TOB2	2033.82	-0.0688602	0.115901	-0.594129	0.552426	0.999972
gene-DTX3L|DTX3L	1622.4	-0.467538	0.238894	-1.9571	0.0503361	0.999972
gene-LOC101107266|LOC101107266	1941.66	-0.0169292	0.073825	-0.229315	0.818624	0.999972
gene-CEP170B|CEP170B	2304.52	0.00634107	0.146402	0.0433126	0.965452	0.999972
gene-PSMB4|PSMB4	1944.69	-0.0892773	0.101743	-0.877478	0.380227	0.999972
gene-YWHAH|YWHAH	1957.23	-0.0108667	0.0869574	-0.124966	0.90055	0.999972
gene-PIP4K2C|PIP4K2C	2008.75	0.0104426	0.0450854	0.231617	0.816835	0.999972
gene-NEK6|NEK6	1872.93	0.0764865	0.166691	0.458851	0.646341	0.999972
gene-MED12|MED12	1883.44	0.0820462	0.106866	0.767749	0.442637	0.999972
gene-FHIP1B|FHIP1B	1996.6	0.0672418	0.0989871	0.679298	0.496949	0.999972
gene-AP2A2|AP2A2	2010.36	0.0241443	0.0762189	0.316777	0.751413	0.999972
gene-IGFBP7|IGFBP7	2197.23	0.138278	0.136131	1.01577	0.30974	0.999972
gene-LOC121819193|LOC121819193	2186.19	-0.0474741	0.0937813	-0.506221	0.612701	0.999972
gene-IL20RA|IL20RA	1440.47	0.219649	0.375098	0.585578	0.558159	0.999972
gene-PDGFRA|PDGFRA	1804.17	-0.0918673	0.166076	-0.553162	0.580152	0.999972
gene-LOC101117285|LOC101117285	1966.16	0.0683251	0.154656	0.441786	0.658644	0.999972
gene-HERC1|HERC1	1941.83	0.0586216	0.125465	0.467235	0.640332	0.999972
gene-NIPSNAP2|NIPSNAP2	2125.3	0.0585784	0.134334	0.436065	0.66279	0.999972
gene-POLR2B|POLR2B	1872.07	-0.0292156	0.0590722	-0.494575	0.6209	0.999972
gene-KHDRBS1|KHDRBS1	1921.7	0.0648158	0.070559	0.918603	0.358303	0.999972
gene-LOC114114909|LOC114114909	1936.93	0.105617	0.131599	0.80257	0.422224	0.999972
gene-TMEM164|TMEM164	1885.32	0.0935135	0.230145	0.406323	0.684505	0.999972
gene-MED13L|MED13L	2104.65	0.163898	0.085043	1.92724	0.0539502	0.999972
gene-C1QB|C1QB	1513.67	-0.434721	0.283769	-1.53195	0.125534	0.999972
gene-ARFGAP3|ARFGAP3	2190.28	0.0465749	0.0793815	0.586722	0.55739	0.999972
gene-PPP6R1|PPP6R1	1929.14	-0.0357558	0.0622507	-0.574384	0.565708	0.999972
gene-GUCD1|GUCD1	2017.91	-0.0920637	0.0850703	-1.08221	0.27916	0.999972
gene-LOC101105188|LOC101105188	2150.68	0.10478	0.094507	1.1087	0.267558	0.999972
gene-SLC25A36|SLC25A36	1664.88	0.0533771	0.1312	0.406838	0.684127	0.999972
gene-PTPN2|PTPN2	1853.57	0.00462413	0.081407	0.0568026	0.954702	0.999972
gene-BAZ1B|BAZ1B	2081.17	0.0704544	0.0657126	1.07216	0.283648	0.999972
gene-GALNT5|GALNT5	1928.23	-0.148273	0.179683	-0.825188	0.409265	0.999972
gene-RAPH1|RAPH1	1828.62	0.0546272	0.100786	0.542011	0.587811	0.999972
gene-LOC121817059|LOC121817059	1724.33	0.404058	0.301849	1.33861	0.180698	0.999972
gene-FBXW2|FBXW2	1718.02	-0.105956	0.101893	-1.03988	0.298397	0.999972
gene-WDR26|WDR26	2047.55	0.114607	0.0815241	1.40581	0.15978	0.999972
gene-MED1|MED1	2107.92	0.0131657	0.0724056	0.181833	0.855714	0.999972
gene-LOC105605822|LOC105605822	2413.16	0.138973	0.106347	1.30679	0.191283	0.999972
gene-EHD4|EHD4	1989.72	-0.0602319	0.103757	-0.580509	0.561571	0.999972
gene-EIF3F|EIF3F	1876.19	0.163289	0.101903	1.6024	0.109068	0.999972
gene-LOC114118411|LOC114118411	1279.57	-0.384112	0.37268	-1.03067	0.302694	0.999972
gene-ITCH|ITCH	1974.18	0.0490197	0.0638425	0.767822	0.442593	0.999972
gene-CXCL14|CXCL14	2866.63	-0.6355	0.274553	-2.31467	0.0206309	0.999972
gene-HMGA1|HMGA1	2053.99	-0.133809	0.160452	-0.833956	0.404306	0.999972
gene-SEC62|SEC62	2116.23	0.0721916	0.0972707	0.742171	0.457984	0.999972
gene-GALNT3|GALNT3	1729.62	-0.18446	0.147273	-1.2525	0.210387	0.999972
gene-DYNLL2|DYNLL2	2389.32	0.0632258	0.109258	0.578682	0.562804	0.999972
gene-LOC114110275|LOC114110275	1531	-0.116062	0.171441	-0.676977	0.49842	0.999972
gene-S100A11|S100A11	2129.51	-0.00956403	0.175086	-0.0546246	0.956438	0.999972
gene-TNKS1BP1|TNKS1BP1	2587.38	-0.0027644	0.231443	-0.0119442	0.99047	0.999972
gene-LOC114117553|LOC114117553	1930.22	-0.244061	0.202809	-1.2034	0.228821	0.999972
gene-TM9SF4|TM9SF4	2091.49	0.151018	0.117567	1.28453	0.198958	0.999972
gene-LOC101122097|LOC101122097	1834.22	-0.00429676	0.0910561	-0.047188	0.962363	0.999972
gene-LOC114110581|LOC114110581	1641.66	0.218317	0.195879	1.11455	0.265045	0.999972
gene-GNG12|GNG12	1873.21	-0.0880748	0.120503	-0.730895	0.464843	0.999972
gene-YTHDC1|YTHDC1	1867.4	-0.039354	0.0739535	-0.532146	0.594625	0.999972
gene-CRK|CRK	2027	-0.000848513	0.101176	-0.00838651	0.993309	0.999972
gene-LOC121816877|LOC121816877	1460.94	-0.53524	0.413907	-1.29314	0.195963	0.999972
gene-CC2D1B|CC2D1B	1552.81	0.0991152	0.14508	0.683174	0.494497	0.999972
gene-UGGT1|UGGT1	1822.88	0.104814	0.131728	0.79568	0.426218	0.999972
gene-ILVBL|ILVBL	1780.03	-0.0687742	0.0980469	-0.701442	0.483027	0.999972
gene-BECN1|BECN1	1886.02	-0.0257998	0.0749147	-0.344389	0.730554	0.999972
gene-LBH|LBH	1656.56	-0.418907	0.270472	-1.5488	0.12143	0.999972
gene-ACSF2|ACSF2	1791.13	0.0560998	0.147297	0.380863	0.703305	0.999972
gene-TRIP11|TRIP11	2099.22	0.179231	0.109047	1.64361	0.100258	0.999972
gene-NDUFV1|NDUFV1	2143.91	0.215202	0.0938059	2.29412	0.0217836	0.999972
gene-UAP1|UAP1	2754.89	-0.0128994	0.168233	-0.0766759	0.938881	0.999972
gene-AP2B1|AP2B1	2060.93	0.190279	0.119807	1.58821	0.112239	0.999972
gene-LOC101106419|LOC101106419	2511.89	-0.0323321	0.1972	-0.163956	0.869766	0.999972
gene-GAMT|GAMT	1932.28	0.126618	0.133996	0.944933	0.344693	0.999972
gene-IKBKB|IKBKB	1554.78	-0.0364443	0.129683	-0.281027	0.77869	0.999972
gene-ENTPD4|ENTPD4	1884.31	0.109012	0.100839	1.08105	0.279675	0.999972
gene-MAU2|MAU2	1959.96	-0.157982	0.104257	-1.5153	0.129695	0.999972
gene-ETF1|ETF1	1934.51	0.085921	0.100618	0.853937	0.39314	0.999972
gene-ITSN2|ITSN2	1757.75	-0.0124507	0.0855664	-0.145509	0.884309	0.999972
gene-MIDN|MIDN	1960.42	0.0122212	0.142265	0.0859043	0.931543	0.999972
gene-ARPC4|ARPC4	1616.99	-0.0949083	0.106308	-0.892767	0.371982	0.999972
gene-HSPA1A|HSPA1A	3111.82	-0.351326	0.419828	-0.836833	0.402686	0.999972
gene-BIN1|BIN1	1956.26	-0.0733793	0.195721	-0.374917	0.707722	0.999972
gene-SNX9|SNX9	1724.08	-0.0039234	0.149022	-0.0263276	0.978996	0.999972
gene-MDM4|MDM4	1918.01	-0.0564146	0.0989445	-0.570165	0.568566	0.999972
gene-MXD1|MXD1	1660.83	-0.411711	0.286213	-1.43848	0.150299	0.999972
gene-PPP6R3|PPP6R3	2063.18	-0.0535209	0.0708695	-0.755204	0.450127	0.999972
gene-SLK|SLK	2090.6	-0.077968	0.0869173	-0.897036	0.3697	0.999972
gene-EPAS1|EPAS1	2411.73	0.130086	0.150834	0.862444	0.388443	0.999972
gene-NDUFA4|NDUFA4	1979.42	0.0145645	0.168173	0.0866047	0.930986	0.999972
gene-RHOF|RHOF	1961.01	-0.0540269	0.119209	-0.453211	0.650397	0.999972
gene-SC5D|SC5D	2206.43	-0.0771451	0.110844	-0.695976	0.486444	0.999972
gene-LOC101117269|LOC101117269	2023.19	-0.0188097	0.0651859	-0.288554	0.772922	0.999972
gene-EMC1|EMC1	2232.35	0.156389	0.109041	1.43422	0.15151	0.999972
gene-EXOC3L4|EXOC3L4	1537.32	-0.140189	0.212986	-0.658205	0.510407	0.999972
gene-ATG2A|ATG2A	1885.17	0.065769	0.0964314	0.682028	0.495221	0.999972
gene-EPN1|EPN1	2240.05	0.212582	0.103694	2.05009	0.0403552	0.999972
gene-TNPO1|TNPO1	1991.32	0.00710667	0.0830109	0.0856113	0.931775	0.999972
gene-C20H6orf89|C20H6orf89	1852.25	0.037135	0.0841308	0.441396	0.658927	0.999972
gene-ARID4B|ARID4B	1835.85	0.0814063	0.117856	0.690729	0.489736	0.999972
gene-SCPEP1|SCPEP1	1722.14	-0.201034	0.175201	-1.14744	0.251198	0.999972
gene-UBE2I|UBE2I	2025.07	-0.0484361	0.0725143	-0.667952	0.504164	0.999972
gene-MAN2A1|MAN2A1	1737.64	0.0705485	0.0865578	0.815045	0.415046	0.999972
gene-PSMA6|PSMA6	1666.08	-0.156847	0.0997818	-1.5719	0.115974	0.999972
gene-VPS4B|VPS4B	1786.2	-0.120519	0.0893156	-1.34936	0.17722	0.999972
gene-IKBKE|IKBKE	1256.54	-0.0255076	0.203986	-0.125046	0.900487	0.999972
gene-SORL1|SORL1	1733.9	-0.0549127	0.151426	-0.362636	0.716877	0.999972
gene-BAIAP2L1|BAIAP2L1	1831.89	-0.165368	0.127422	-1.2978	0.194356	0.999972
gene-LIPH|LIPH	1803.38	-0.00803656	0.338495	-0.0237421	0.981058	0.999972
gene-PSMD1|PSMD1	1794.7	0.0356074	0.103788	0.343079	0.731539	0.999972
gene-TAOK2|TAOK2	2004.98	-0.0269131	0.0798031	-0.337244	0.735933	0.999972
gene-SLC39A7|SLC39A7	2153.2	0.0999194	0.117818	0.848086	0.39639	0.999972
gene-LHFPL2|LHFPL2	1801.37	-0.0238951	0.104964	-0.227652	0.819917	0.999972
gene-LOC101109032|LOC101109032	1683.64	0.261391	0.137137	1.90605	0.0566431	0.999972
gene-LCOR|LCOR	1762.3	-0.0065857	0.0708287	-0.0929806	0.925919	0.999972
gene-CUX1|CUX1	1822.37	0.0313061	0.0693021	0.451734	0.65146	0.999972
gene-GPBP1L1|GPBP1L1	2049.44	0.000251812	0.0656135	0.00383781	0.996938	0.999972
gene-FZD5|FZD5	2182.44	-0.0214692	0.114519	-0.187473	0.85129	0.999972
gene-NUCKS1|NUCKS1	2018.74	0.00779542	0.113617	0.0686116	0.945299	0.999972
gene-YAP1|YAP1	1841.77	-0.031741	0.0607168	-0.522772	0.601133	0.999972
gene-NRDC|NRDC	1848.4	-0.021757	0.0902465	-0.241084	0.80949	0.999972
gene-DOT1L|DOT1L	1800.54	0.0266357	0.0862792	0.308715	0.757538	0.999972
gene-LOC101117010|LOC101117010	1953.24	-0.0183205	0.0647103	-0.283116	0.777088	0.999972
gene-KDM5A|KDM5A	1810.48	0.0422256	0.0874873	0.482649	0.629345	0.999972
gene-TMEM87A|TMEM87A	1890.41	0.00680571	0.147419	0.0461657	0.963178	0.999972
gene-SIPA1L3|SIPA1L3	1806.71	-0.00705737	0.0810339	-0.0870916	0.930599	0.999972
gene-CCNT2|CCNT2	1768.85	-0.00934676	0.0750785	-0.124493	0.900925	0.999972
gene-LOC101106216|LOC101106216	1928.39	-0.0459975	0.0600539	-0.765937	0.443714	0.999972
gene-ARHGAP1|ARHGAP1	1682.05	-0.0387517	0.10074	-0.384672	0.70048	0.999972
gene-ERP44|ERP44	1843.49	-0.000978922	0.0889921	-0.0110001	0.991223	0.999972
gene-DNAJC7|DNAJC7	1544.11	-0.0750709	0.108372	-0.692712	0.48849	0.999972
gene-ROCK2|ROCK2	2018.57	-0.05287	0.130219	-0.406008	0.684737	0.999972
gene-ATL3|ATL3	1964.82	-0.169321	0.166802	-1.0151	0.310057	0.999972
gene-DYNLL1|DYNLL1	1958.01	-0.0879071	0.0983345	-0.89396	0.371343	0.999972
gene-RTN4|RTN4	1945.03	-0.0728593	0.0696056	-1.04674	0.295217	0.999972
gene-SREBF1|SREBF1	1852.95	0.157871	0.179093	0.881501	0.378047	0.999972
gene-TRIM28|TRIM28	2088.55	-0.0210077	0.0756414	-0.277728	0.781221	0.999972
gene-SELENBP1|SELENBP1	1521.01	0.151723	0.279394	0.543041	0.587102	0.999972
gene-FAM91A1|FAM91A1	1862.14	0.106105	0.116871	0.907881	0.363941	0.999972
gene-CSK|CSK	1703.09	-0.0374849	0.104938	-0.357209	0.720935	0.999972
gene-CNN3|CNN3	1914.96	-0.0458806	0.132694	-0.345763	0.729521	0.999972
gene-TGFBR2|TGFBR2	1909.72	-0.044322	0.133823	-0.331199	0.740494	0.999972
gene-LOC101110742|LOC101110742	1719.69	-0.137035	0.0767329	-1.78588	0.0741194	0.999972
gene-MTSS1|MTSS1	1908.7	0.168787	0.106992	1.57756	0.114666	0.999972
gene-TSPO|TSPO	1799.76	-0.0782617	0.108463	-0.721553	0.470569	0.999972
gene-CXCL10|CXCL10	1175.29	-0.901225	0.407038	-2.21411	0.0268215	0.999972
gene-LOC105614854|LOC105614854	1778.27	-0.213534	0.115457	-1.84947	0.0643893	0.999972
gene-SLC9A3|SLC9A3	1920.76	0.378137	0.870681	0.4343	0.66407	0.999972
gene-RBBP6|RBBP6	2091.06	-0.0454147	0.098517	-0.460984	0.64481	0.999972
gene-LOC101104866|LOC101104866	3001.12	0.11027	0.536939	0.205368	0.837285	0.999972
gene-SETX|SETX	1751.09	-0.181628	0.102096	-1.77899	0.0752406	0.999972
gene-DYRK2|DYRK2	1855.91	-0.107689	0.0885306	-1.21641	0.22383	0.999972
gene-PTK2|PTK2	1772.96	0.0573087	0.0676183	0.847533	0.396698	0.999972
gene-LOC114117582|LOC114117582	3024.54	-0.0932456	0.366946	-0.254112	0.799409	0.999972
gene-PAXBP1|PAXBP1	1933.55	0.120477	0.106464	1.13162	0.257794	0.999972
gene-OSBPL3|OSBPL3	1438.49	0.10919	0.153641	0.710679	0.477283	0.999972
gene-PTPRK|PTPRK	1971.43	0.0251965	0.082928	0.303836	0.761253	0.999972
gene-SBNO1|SBNO1	1956.66	-0.00845096	0.0891967	-0.0947452	0.924517	0.999972
gene-ARHGAP5|ARHGAP5	2016.31	0.00040624	0.0982882	0.00413315	0.996702	0.999972
gene-RNPS1|RNPS1	1862.02	-0.0292707	0.0746629	-0.392038	0.69503	0.999972
gene-PYGB|PYGB	1725.75	0.0123599	0.122535	0.100868	0.919655	0.999972
gene-LOC101104449|LOC101104449	1969.29	-0.00410671	0.0743571	-0.0552296	0.955956	0.999972
gene-WSB1|WSB1	1874.43	0.0222887	0.106878	0.208543	0.834805	0.999972
gene-LOC105611550|LOC105611550	2008.63	0.0873946	0.309553	0.282325	0.777694	0.999972
gene-NAGA|NAGA	1648.31	-0.0521743	0.134907	-0.386743	0.698946	0.999972
gene-SPTLC1|SPTLC1	1794.34	-0.039133	0.0876408	-0.446515	0.655225	0.999972
gene-IL17RC|IL17RC	1884.41	-0.0387937	0.119563	-0.324463	0.745588	0.999972
gene-MARCHF7|MARCHF7	1769.66	-0.0275997	0.0738673	-0.373639	0.708673	0.999972
gene-CORO1A|CORO1A	1432.77	-0.2379	0.215274	-1.1051	0.269116	0.999972
gene-MAN2C1|MAN2C1	2031.17	0.10385	0.145178	0.715329	0.474406	0.999972
gene-GNAI2|GNAI2	1924.6	-0.0636939	0.0913526	-0.697231	0.485658	0.999972
gene-SIDT2|SIDT2	1766.55	0.369765	0.228049	1.62143	0.104926	0.999972
gene-SPRYD3|SPRYD3	1980.56	0.0168876	0.0814659	0.207297	0.835778	0.999972
gene-STK10|STK10	1542.84	0.0218192	0.16673	0.130866	0.895881	0.999972
gene-KANSL3|KANSL3	1886.27	0.0298249	0.115824	0.257502	0.796791	0.999972
gene-PLEKHA7|PLEKHA7	1699.52	-0.0324842	0.117519	-0.276418	0.782227	0.999972
gene-RBM6|RBM6	1815.51	-0.0484178	0.0798107	-0.606657	0.544078	0.999972
gene-MOV10|MOV10	1712.3	-0.237342	0.156174	-1.51973	0.128579	0.999972
gene-HS3ST1|HS3ST1	1269.78	0.111719	0.205652	0.543243	0.586963	0.999972
gene-NAP1L1|NAP1L1	1903.36	-0.0722563	0.0887284	-0.814353	0.415443	0.999972
gene-HECTD4|HECTD4	1764.15	0.155861	0.0966094	1.61331	0.106677	0.999972
gene-SH3GLB2|SH3GLB2	1787.45	0.021673	0.223673	0.0968959	0.922809	0.999972
gene-PACS1|PACS1	1679.47	-0.0656106	0.113807	-0.576508	0.564272	0.999972
gene-UBR2|UBR2	1808.8	0.0494551	0.0661855	0.747219	0.454931	0.999972
gene-CKAP4|CKAP4	1778.15	0.044473	0.134681	0.330209	0.741242	0.999972
gene-MYO1C|MYO1C	1976.29	-0.039238	0.112445	-0.348952	0.727125	0.999972
gene-LOC114117773|LOC114117773	1384.5	0.107869	0.265053	0.406972	0.684028	0.999972
gene-ITPRIPL2|ITPRIPL2	1455.92	-0.181299	0.139992	-1.29506	0.195299	0.999972
gene-ATP5MF|ATP5MF	1826.77	0.0633357	0.0930951	0.680334	0.496293	0.999972
gene-PRRC1|PRRC1	2051.73	0.0771458	0.110698	0.696901	0.485865	0.999972
gene-CDH26|CDH26	352.775	-1.44723	2.88589	-0.501486	0.616029	0.999972
gene-LOC101111060|LOC101111060	1683.29	0.10917	0.101932	1.07101	0.284165	0.999972
gene-ARHGEF11|ARHGEF11	1473.7	-0.106525	0.112996	-0.942739	0.345814	0.999972
gene-VWF|VWF	2286.06	0.235632	0.168556	1.39795	0.162129	0.999972
gene-TECPR1|TECPR1	1733.74	0.0104951	0.120284	0.087253	0.93047	0.999972
gene-TPP1|TPP1	1454.22	0.0440967	0.146741	0.300506	0.763791	0.999972
gene-SMAD4|SMAD4	1807.78	0.00234075	0.0539323	0.0434016	0.965381	0.999972
gene-EIF3L|EIF3L	1979.25	0.0319628	0.0798685	0.400192	0.689015	0.999972
gene-RPS6KA3|RPS6KA3	1700.32	0.0427308	0.0960981	0.444658	0.656567	0.999972
gene-SECISBP2L|SECISBP2L	1764.03	-0.048191	0.069421	-0.694184	0.487567	0.999972
gene-PTPN11|PTPN11	1749.9	0.0230418	0.076093	0.302811	0.762034	0.999972
gene-LOC101108778|LOC101108778	1582.48	0.00937929	0.143502	0.06536	0.947887	0.999972
gene-CMAS|CMAS	1628.21	-0.0635396	0.12138	-0.523476	0.600643	0.999972
gene-FMR1|FMR1	1648.87	0.0514597	0.112708	0.456575	0.647976	0.999972
gene-AP1B1|AP1B1	1741.12	0.0824981	0.114388	0.72121	0.47078	0.999972
gene-KLF13|KLF13	1686.24	-0.0779132	0.161759	-0.481662	0.630046	0.999972
gene-HP1BP3|HP1BP3	1875.08	0.000187629	0.0734721	0.00255375	0.997962	0.999972
gene-NELFCD|NELFCD	1787.04	0.0146671	0.0740002	0.198204	0.842886	0.999972
gene-RHOBTB1|RHOBTB1	1975.96	0.0763199	0.1471	0.518829	0.60388	0.999972
gene-EMC10|EMC10	2108.71	0.041235	0.0808159	0.510234	0.609888	0.999972
gene-LOC101122601|LOC101122601	1101.3	-0.164496	0.413531	-0.397783	0.69079	0.999972
gene-KCNK5|KCNK5	1562.69	-0.0841602	0.141779	-0.593602	0.552778	0.999972
gene-LRATD2|LRATD2	1736.66	-0.157564	0.0921902	-1.70911	0.0874299	0.999972
gene-GPRC5C|GPRC5C	1699.37	-0.0590191	0.251251	-0.234901	0.814285	0.999972
gene-PSMA2|PSMA2	1542.35	-0.191764	0.114491	-1.67492	0.0939504	0.999972
gene-ZNF106|ZNF106	1822.23	0.067591	0.0741871	0.911088	0.362249	0.999972
gene-LRRFIP1|LRRFIP1	1844.86	0.0125196	0.0711668	0.175919	0.860357	0.999972
gene-PTPRN2|PTPRN2	2367.26	0.165377	0.191747	0.862476	0.388426	0.999972
gene-STK38|STK38	1587.94	0.0771858	0.15496	0.498103	0.618412	0.999972
gene-UHMK1|UHMK1	1861.89	0.0986088	0.113867	0.866001	0.38649	0.999972
gene-TOP1|TOP1	1665.25	-0.0163988	0.109171	-0.150213	0.880597	0.999972
gene-GPAT4|GPAT4	1770.45	-0.0183828	0.0631195	-0.291238	0.770869	0.999972
gene-DENND11|DENND11	1442.38	-0.0367606	0.151307	-0.242954	0.808041	0.999972
gene-PDLIM5|PDLIM5	1767.04	-0.197598	0.113777	-1.73672	0.0824372	0.999972
gene-GIGYF1|GIGYF1	1820.52	-0.0681139	0.141409	-0.481681	0.630033	0.999972
gene-RPL36|RPL36	1575.16	-0.255552	0.162054	-1.57696	0.114805	0.999972
gene-DNMT1|DNMT1	1741.45	-0.056681	0.087374	-0.648718	0.516521	0.999972
gene-GRAMD1B|GRAMD1B	1534.98	-0.0964882	0.227161	-0.424757	0.671014	0.999972
gene-SMG7|SMG7	1797.84	0.00951995	0.0765332	0.12439	0.901007	0.999972
gene-STX16|STX16	1826.58	0.0158918	0.0791889	0.200683	0.840947	0.999972
gene-WSB2|WSB2	1725.37	0.135394	0.081515	1.66097	0.0967202	0.999972
gene-PTK2B|PTK2B	1501.25	-0.0682912	0.140307	-0.486729	0.626451	0.999972
gene-PDK4|PDK4	2704.59	0.993676	0.553039	1.79675	0.0723746	0.999972
gene-LOC101106475|LOC101106475	1741.93	-0.0612212	0.11827	-0.51764	0.60471	0.999972
gene-PHB2|PHB2	1856.33	0.16915	0.103769	1.63006	0.103088	0.999972
gene-SEMA4G|SEMA4G	1645.74	-0.315579	0.203549	-1.55038	0.12105	0.999972
gene-VPS35|VPS35	1679.78	-0.00761313	0.0758897	-0.100318	0.920092	0.999972
gene-SLC35D1|SLC35D1	1691.88	-0.0471661	0.203196	-0.232121	0.816444	0.999972
gene-CLUH|CLUH	2016.08	0.246699	0.137073	1.79976	0.0718991	0.999972
gene-PKD1|PKD1	1964.98	-0.0456128	0.112091	-0.406926	0.684062	0.999972
gene-PIK3AP1|PIK3AP1	1224.47	-0.173428	0.20074	-0.863941	0.38762	0.999972
gene-FARP1|FARP1	1687.88	0.057048	0.0759337	0.751287	0.45248	0.999972
gene-HGS|HGS	1831.64	0.0155024	0.0738123	0.210024	0.833649	0.999972
gene-SDF4|SDF4	1818.05	0.0315022	0.0792677	0.397415	0.691061	0.999972
gene-LUM|LUM	2072.91	-0.334761	0.293932	-1.13891	0.254742	0.999972
gene-MTPN|MTPN	1779.27	0.00966299	0.0587843	0.16438	0.869432	0.999972
gene-CCL5|CCL5	908.22	-0.826994	0.42584	-1.94203	0.0521334	0.999972
gene-VARS1|VARS1	2234.73	0.114312	0.17316	0.660153	0.509155	0.999972
gene-SAMHD1|SAMHD1	1877.68	-0.0338838	0.201089	-0.168501	0.866189	0.999972
gene-NRAS|NRAS	1637.81	-0.127973	0.0804503	-1.5907	0.111676	0.999972
gene-LOC101109212|LOC101109212	1962.35	-0.0213766	0.144383	-0.148055	0.882299	0.999972
gene-BAG1|BAG1	1812.89	0.0710129	0.0969764	0.73227	0.464004	0.999972
gene-CSNK2A1|CSNK2A1	1836.02	0.0160767	0.0562347	0.285886	0.774966	0.999972
gene-SRPK1|SRPK1	1673.8	0.0495461	0.0841118	0.58905	0.555828	0.999972
gene-FRYL|FRYL	1647.95	-0.0470334	0.103362	-0.455037	0.649082	0.999972
gene-MEGF8|MEGF8	1679.2	-0.126354	0.145007	-0.871363	0.383556	0.999972
gene-SPG11|SPG11	1541.76	0.123917	0.127548	0.971535	0.331282	0.999972
gene-SOAT1|SOAT1	1671.69	0.204297	0.160918	1.26957	0.204239	0.999972
gene-LARP4B|LARP4B	1754.37	0.0744214	0.0665669	1.11799	0.26357	0.999972
gene-BRD4|BRD4	1725.03	0.0574735	0.0809323	0.710143	0.477615	0.999972
[truncated: 16,798 more rows]

## Sheet: TableS3
Table S3. DESeq2 analysis of differential transcript expression from abomasum comparing H. contortus susceptible and resistant Morada Nova sheep. Differentially expressed transcripts (q-value < 0.1 and |FC| > 1.5) are in bold.
Transcript ID	baseMean	log2FoldChange	lfcSE	stat	pvalue	padj	Gene ID
rna-XR_006058459.1	363.978	12.0203	0.962952	12.4828	9.27266e-36	4.12652e-31	LOC121818463
rna-XM_042240704.1	187.201	-10.9718	0.943777	-11.6254	3.06061e-31	6.81016e-27	TECPR1
rna-XM_015092088.3	267.158	10.9965	1.01347	10.8503	1.98778e-27	2.94868e-23	LRRC8B
rna-XM_042240703.1	145.645	-10.6094	1.10059	-9.63975	5.43176e-22	6.0431e-18	TECPR1
rna-XM_042237550.1	938.98	-27.7887	3.02622	-9.18263	4.20671e-20	3.74414e-16	DST
rna-XR_003586743.2	105.901	-10.1498	1.1115	-9.13159	6.75028e-20	5.00668e-16	KDSR
rna-XM_042234479.1	141.628	10.6587	1.17834	9.04549	1.48994e-19	9.47219e-16	EP400
rna-XM_042237551.1	409.184	-26.6448	3.02627	-8.80449	1.31447e-18	7.31205e-15	DST
rna-XM_042239836.1	334.596	-26.3715	3.02629	-8.71415	2.92948e-18	1.44853e-14	FAM234A
rna-XM_042235850.1	322.304	-26.3239	3.02629	-8.6984	3.36603e-18	1.49795e-14	TRANK1
rna-XM_027977036.2	53.0997	7.12058	0.830848	8.57025	1.03263e-17	4.17765e-14	FAM110A
rna-XM_042240982.1	228.205	-25.8499	3.02633	-8.54165	1.32313e-17	4.52939e-14	DLG5
rna-XM_042252341.1	231.891	-25.8714	3.02633	-8.54877	1.24411e-17	4.52939e-14	HERC1
rna-XM_004007898.5	309.593	25.6735	3.0263	8.48347	2.18574e-17	6.48465e-14	SEPTIN7
rna-XM_042243902.1	201.725	-25.6773	3.02635	-8.48457	2.16519e-17	6.48465e-14	RIF1
rna-XM_042251691.1	44.9959	9.00418	1.07069	8.40971	4.11022e-17	1.14321e-13	HGFAC
rna-XM_042252690.1	155.078	-25.3244	3.0264	-8.36784	5.86835e-17	1.5362e-13	SUSD6
rna-XM_042230127.1	416.583	-25.2891	3.02627	-8.35652	6.45974e-17	1.59706e-13	RALGAPB
rna-XR_003587432.2	20.2462	7.85094	0.943473	8.32132	8.69855e-17	2.03738e-13	LOC114111361
rna-XM_042249773.1	338.19	25.0757	3.02629	8.28596	1.17158e-16	2.60688e-13	ILVBL
rna-XM_042240125.1	125.528	-25.0353	3.02645	-8.27217	1.31542e-16	2.78756e-13	SETD1A
rna-XM_027975562.2	116.849	-24.9377	3.02647	-8.23986	1.72417e-16	3.48767e-13	TPM3
rna-XM_027975378.2	177.408	24.8982	3.02638	8.22706	1.91863e-16	3.71231e-13	VEZF1
rna-XM_027966490.2	103.293	-24.7683	3.02651	-8.18378	2.75068e-16	4.98416e-13	KIDINS220
rna-XM_027970187.2	102.639	-24.7616	3.02651	-8.18157	2.8016e-16	4.98416e-13	PWWP3A
rna-XM_042248067.1	101.61	-24.7475	3.02651	-8.17692	2.91196e-16	4.98416e-13	AAK1
rna-XM_042240377.1	102.051	-24.7162	3.02651	-8.16658	3.17261e-16	5.22917e-13	LRRC8B
rna-XM_042239852.1	148.622	24.6534	3.02642	8.14606	3.75964e-16	5.97542e-13	FAM234A
rna-XM_027973076.2	131.974	24.488	3.02645	8.09132	5.90229e-16	9.05737e-13	RAP1A
rna-XM_012159651.4	129.923	24.4649	3.02646	8.08366	6.28493e-16	9.2839e-13	IGF1
rna-XM_027968469.2	81.0433	-24.439	3.0266	-8.07474	6.76204e-16	9.2839e-13	PPP1R9A
rna-XM_042237171.1	80.7203	-24.4324	3.0266	-8.07255	6.88438e-16	9.2839e-13	LOC114108620
rna-XM_042249702.1	81.0924	-24.4376	3.02659	-8.07429	6.78717e-16	9.2839e-13	ANO8
rna-XM_027957443.2	78.7055	-24.3976	3.02661	-8.06103	7.56554e-16	9.50107e-13	LOC105605761
rna-XM_042237011.1	140.761	-3.92358	0.486449	-8.06576	7.27844e-16	9.50107e-13	BRD2
rna-XM_042241034.1	88.3861	-24.3878	3.02656	-8.05793	7.75996e-16	9.50107e-13	HNRNPF
rna-XM_042252372.1	77.7729	-24.3816	3.02661	-8.05575	7.89941e-16	9.50107e-13	RAP1A
rna-XM_042250750.1	75.9887	-24.3483	3.02662	-8.0447	8.64599e-16	9.86574e-13	FAM172A
rna-XR_006056369.1	76.1572	-24.3508	3.02662	-8.04554	8.58636e-16	9.86574e-13	LOC121816699
rna-XR_003587253.2	74.9924	-24.3335	3.02663	-8.03981	8.99799e-16	1.00107e-12	LOC101112291
rna-XM_042256835.1	108.501	-24.3195	3.02649	-8.03553	9.31754e-16	1.01134e-12	MTOR
rna-XM_042237547.1	73.6165	-24.3081	3.02664	-8.03138	9.63822e-16	1.02124e-12	DST
rna-XM_027973743.2	111.968	24.2604	3.0265	8.01598	1.09258e-15	1.13075e-12	DOCK9
rna-XM_027971761.2	212.661	24.2372	3.02635	8.00872	1.15904e-15	1.17227e-12	HERC1
rna-XM_042241112.1	64.9603	-24.1332	3.0267	-7.97345	1.54306e-15	1.52599e-12	SIPA1L2
rna-XM_042241157.1	101.084	24.1169	3.02653	7.96849	1.6062e-15	1.55389e-12	JMJD1C
rna-XM_042233841.1	112.889	24.0732	3.0265	7.95416	1.80351e-15	1.67208e-12	LIFR
rna-XM_042245524.1	125.368	-24.0795	3.02645	-7.95636	1.77176e-15	1.67208e-12	HMCN2
rna-XM_042230013.1	145.818	24.0599	3.02643	7.94992	1.86632e-15	1.695e-12	ASXL1
rna-XM_042245527.1	71.051	-24.0226	3.02665	-7.93703	2.07077e-15	1.84307e-12	HMCN2
rna-XM_042231485.1	93.56	24.007	3.02656	7.93209	2.1548e-15	1.84409e-12	GAN
rna-XM_042236237.1	59.4383	-24.0144	3.02674	-7.93408	2.12061e-15	1.84409e-12	QRICH1
rna-XM_042246600.1	58.7316	-23.9996	3.02675	-7.92917	2.20609e-15	1.85236e-12	FOXJ3
rna-XM_027969728.2	57.2922	-23.9677	3.02676	-7.91859	2.40219e-15	1.94367e-12	EVI5L
rna-XM_042237490.1	57.3623	-23.9687	3.02676	-7.91893	2.39565e-15	1.94367e-12	C20H6orf62
rna-XM_027959872.2	56.7327	-23.951	3.02677	-7.91307	2.5112e-15	1.9956e-12	ANO1
rna-XM_012180332.4	56.0925	-23.9386	3.02678	-7.90894	2.5959e-15	2.01608e-12	GSK3B
rna-XM_027960051.2	56.1509	-23.934	3.02678	-7.90743	2.62759e-15	2.01608e-12	SNX19
rna-XM_042244355.1	55.8057	-23.9257	3.02678	-7.90468	2.68616e-15	2.0249e-12	ESPNL
rna-XM_042255381.1	55.3935	-23.9196	3.02678	-7.90266	2.73008e-15	2.0249e-12	SYNRG
rna-XM_042234554.1	51.9933	-23.8344	3.02682	-7.87439	3.42417e-15	2.47112e-12	ZNF664
rna-XM_042240613.1	82.8821	23.8306	3.02661	7.87371	3.44275e-15	2.47112e-12	MICALL2
rna-XM_012103819.3	51.5133	-23.8215	3.02683	-7.87012	3.54301e-15	2.49209e-12	PIGN
rna-XM_042238426.1	62.3619	-23.8163	3.02672	-7.86868	3.58396e-15	2.49209e-12	TTC3
rna-XM_042248090.1	118.29	23.7928	3.02648	7.86155	3.7942e-15	2.55832e-12	ALMS1
rna-XM_042251581.1	51.1233	-23.7979	3.02683	-7.86232	3.7709e-15	2.55832e-12	LOC101118024
rna-XM_042232887.1	50.1571	-23.7862	3.02685	-7.85842	3.89017e-15	2.58388e-12	LOC101104855
rna-XM_042242979.1	50.8095	-23.7752	3.02684	-7.85481	4.00368e-15	2.62017e-12	SYK
rna-XM_042238000.1	76.0787	23.7207	3.02665	7.8373	4.60337e-15	2.90114e-12	HPS5
rna-XM_042240855.1	47.7848	-23.7205	3.02688	-7.83661	4.62858e-15	2.90114e-12	TAF5L
rna-XM_042241028.1	55.5862	-23.7297	3.02678	-7.83992	4.50833e-15	2.90114e-12	HNRNPF
rna-XM_012116041.4	75.2836	23.6991	3.02665	7.83013	4.87366e-15	2.93092e-12	NOL8
rna-XM_042232901.1	75.2378	23.7035	3.02665	7.8316	4.81685e-15	2.93092e-12	ZC3H12C
rna-XM_042241234.1	47.3475	-23.7076	3.02688	-7.83233	4.78896e-15	2.93092e-12	WDR17
rna-XM_027975972.2	46.8367	-23.6911	3.02689	-7.82686	5.00191e-15	2.96793e-12	TRAF5
rna-XM_042249187.1	46.4807	-23.6592	3.0269	-7.81634	5.43835e-15	3.18444e-12	KMT2E
rna-XM_027963688.2	44.9483	-23.6381	3.02692	-7.80929	5.75125e-15	3.32392e-12	GCNA
rna-XM_027976532.2	43.9633	-23.6072	3.02694	-7.79904	6.23779e-15	3.5589e-12	DHTKD1
rna-XM_042234745.1	70.1227	23.5981	3.02669	7.79668	6.35559e-15	3.58021e-12	GRK3
rna-XM_042236420.1	43.2031	-23.5836	3.02695	-7.79119	6.63807e-15	3.68519e-12	RAF1
rna-XM_042237454.1	43.117	-23.5796	3.02695	-7.78987	6.70757e-15	3.68519e-12	LOC121817420
rna-XM_042230646.1	68.3148	23.5649	3.0267	7.78568	6.93405e-15	3.74987e-12	LOC114117570
rna-XM_042253518.1	100.51	23.5603	3.02653	7.78459	6.99382e-15	3.74987e-12	MAP3K5
rna-XM_042242255.1	67.6905	23.5567	3.0267	7.78296	7.08476e-15	3.7534e-12	TAB3
rna-XM_042241375.1	42.3429	-23.5515	3.02697	-7.78056	7.22027e-15	3.78019e-12	TNKS
rna-XM_042244074.1	47.4802	-23.5279	3.02688	-7.77298	7.666e-15	3.96689e-12	INO80D
rna-XM_042234883.1	42.9561	-23.5071	3.02696	-7.76593	8.10488e-15	4.11636e-12	DGCR2
rna-XM_042242556.1	53.1546	-23.5043	3.02681	-7.76538	8.13986e-15	4.11636e-12	ZNF275
rna-XM_042233809.1	39.5028	-23.462	3.02702	-7.75086	9.12753e-15	4.56397e-12	YEATS2
rna-XM_027960893.2	39.0666	-23.4471	3.02703	-7.74589	9.49122e-15	4.59107e-12	ZNF532
rna-XM_042233998.1	39.2799	-23.4543	3.02703	-7.7483	9.31286e-15	4.59107e-12	EXOC3
rna-XM_042256905.1	39.2386	-23.4503	3.02703	-7.74698	9.41058e-15	4.59107e-12	ZC3H11A
rna-XM_042234080.1	38.6115	-23.4215	3.02704	-7.73743	1.01448e-14	4.85447e-12	EIF4ENIF1
rna-XM_012133682.3	38.4401	-23.4154	3.02705	-7.7354	1.03077e-14	4.86912e-12	RAPGEF4
rna-XM_042229221.1	61.0222	23.41	3.02676	7.73434	1.03943e-14	4.86912e-12	SFT2D2
rna-XM_042244863.1	37.9079	-23.4061	3.02706	-7.73229	1.05628e-14	4.89652e-12	SH3BP4
rna-XM_027956342.2	37.685	-23.3956	3.02706	-7.72882	1.08552e-14	4.95499e-12	GUCY1A1
rna-XM_042245156.1	72.4654	23.3906	3.02667	7.72816	1.09116e-14	4.95499e-12	CBX5
rna-XM_012100416.4	37.1111	-23.3754	3.02708	-7.7221	1.14428e-14	5.04187e-12	TRIM59
rna-XM_042233175.1	37.4188	-23.3814	3.02707	-7.72411	1.1264e-14	5.04187e-12	NUMA1
rna-XM_042239408.1	37.363	-23.3778	3.02707	-7.72291	1.13707e-14	5.04187e-12	DTNA
rna-XM_042245625.1	59.1052	23.3687	3.02678	7.72064	1.15743e-14	5.0498e-12	SET
rna-XM_042245833.1	36.9605	-23.363	3.02708	-7.71799	1.18174e-14	5.05672e-12	PUM2
rna-XM_042256153.1	58.8201	23.3621	3.02678	7.71846	1.17744e-14	5.05672e-12	TANC2
rna-XM_042233492.1	36.5133	-23.3475	3.02709	-7.71285	1.23036e-14	5.11713e-12	MADD
rna-XM_042246810.1	37.1612	-23.3494	3.02707	-7.71352	1.22397e-14	5.11713e-12	RPAP3
rna-XR_006056670.1	77.2433	23.3449	3.02664	7.71313	1.22765e-14	5.11713e-12	ANAPC7
rna-XM_027956629.2	36.1091	-23.3384	3.0271	-7.70983	1.25988e-14	5.19139e-12	GIT2
rna-XM_012100439.4	57.4937	23.3286	3.0268	7.70736	1.28451e-14	5.24435e-12	RAB23
rna-XM_042252633.1	40.4858	-23.3261	3.027	-7.70599	1.29828e-14	5.25236e-12	GPHN
rna-XR_006060302.1	35.7597	-23.319	3.02711	-7.7034	1.32492e-14	5.31186e-12	ZWILCH
rna-XM_042251004.1	56.7515	23.3122	3.0268	7.70193	1.34026e-14	5.32537e-12	FER
rna-XM_027973781.2	35.0371	-23.2992	3.02713	-7.6968	1.39521e-14	5.49465e-12	TNFSF13B
rna-XM_042232233.1	35.1255	-23.2949	3.02713	-7.69538	1.41072e-14	5.50702e-12	DHX34
rna-XM_042247751.1	55.785	23.2882	3.02681	7.69395	1.42657e-14	5.52044e-12	JOSD1
rna-XM_042237990.1	34.5801	-23.2757	3.02714	-7.68899	1.48298e-14	5.68927e-12	NAV2
rna-XM_042254018.1	54.3437	23.2498	3.02683	7.68124	1.57554e-14	5.90037e-12	SLC45A4
rna-XM_042256908.1	40.5756	-23.2514	3.027	-7.68134	1.57438e-14	5.90037e-12	ZC3H11A
rna-XR_006057683.1	54.3038	23.2493	3.02683	7.68106	1.57778e-14	5.90037e-12	PWWP2B
rna-XM_027961408.2	54.1056	23.2457	3.02683	7.67988	1.59234e-14	5.9052e-12	DIP2A
rna-XM_004003152.5	33.3426	-23.2319	3.02718	-7.67443	1.66153e-14	6.01258e-12	PLD1
rna-XM_042254762.1	53.5519	23.2312	3.02684	7.67507	1.65326e-14	6.01258e-12	ADAR
rna-XR_006057757.1	33.4975	-23.2318	3.02717	-7.67441	1.66183e-14	6.01258e-12	LOC105604543
rna-XM_012187344.4	33.232	-23.2256	3.02718	-7.67237	1.68853e-14	6.04358e-12	KIF1B
rna-XM_042234091.1	33.1297	-23.2236	3.02718	-7.67168	1.69756e-14	6.04358e-12	PRR14L
rna-XM_004014213.5	82.0816	23.1928	3.02661	7.66294	1.81725e-14	6.30524e-12	NEBL
rna-XM_027956529.2	52.4091	23.2011	3.02685	7.66507	1.78734e-14	6.30524e-12	TAOK3
rna-XM_042239031.1	32.3921	-23.1906	3.0272	-7.66074	1.84866e-14	6.30524e-12	ZNF518A
rna-XM_042239414.1	32.3515	-23.1891	3.02721	-7.66023	1.85607e-14	6.30524e-12	DTNA
rna-XM_042239917.1	52.0495	23.1915	3.02686	7.66191	1.83183e-14	6.30524e-12	SLX4
rna-XM_042247568.1	32.6109	-23.1997	3.0272	-7.66374	1.80597e-14	6.30524e-12	PHC1
rna-XM_027971872.2	31.9911	-23.1638	3.02722	-7.65186	1.98097e-14	6.67857e-12	DDHD1
rna-XM_042234936.1	31.6241	-23.1534	3.02723	-7.64837	2.03548e-14	6.70984e-12	SH3D19
rna-XM_042254269.1	31.7831	-23.1558	3.02722	-7.6492	2.02232e-14	6.70984e-12	DENND4B
rna-XM_042254304.1	82.8226	-23.1496	3.02659	-7.64875	2.02948e-14	6.70984e-12	NCOA2
rna-XM_027966233.2	30.8469	-23.1243	3.02726	-7.6387	2.19419e-14	7.12424e-12	TSC1
rna-XM_027966349.2	30.9031	-23.1266	3.02725	-7.63947	2.18123e-14	7.12424e-12	PKN3
rna-XM_027970443.2	30.9319	-23.1216	3.02725	-7.63783	2.20922e-14	7.12424e-12	SGCD
rna-XM_027971517.2	30.624	-23.1122	3.02726	-7.63468	2.2638e-14	7.24774e-12	ZWILCH
rna-XM_042239024.1	36.4347	-23.1023	3.02709	-7.63183	2.31442e-14	7.35688e-12	TCTN3
rna-XM_042243732.1	30.3523	-23.0917	3.02727	-7.62788	2.38639e-14	7.53184e-12	TLK1
rna-XM_042231643.1	29.8573	-23.0787	3.02729	-7.62356	2.46778e-14	7.60509e-12	OGFOD1
rna-XM_042242228.1	47.8539	23.0743	3.02692	7.62303	2.47795e-14	7.60509e-12	PRKX
rna-XM_042253064.1	35.5415	-23.0782	3.02711	-7.62384	2.46244e-14	7.60509e-12	PCNX4
rna-XM_042257427.1	47.924	23.0751	3.02692	7.6233	2.47262e-14	7.60509e-12	SPEN
rna-XM_042244222.1	47.539	23.0652	3.02692	7.62002	2.53641e-14	7.73117e-12	HDAC4
rna-XM_042230579.1	29.7886	-23.0609	3.02729	-7.61768	2.58285e-14	7.81919e-12	SUV39H2
rna-XM_012172464.4	29.5189	-23.0542	3.0273	-7.61542	2.62841e-14	7.84763e-12	PREPL
rna-XM_042229220.1	29.2724	-23.048	3.02731	-7.61334	2.67106e-14	7.84763e-12	ANGEL2
rna-XM_042247165.1	46.8551	23.0459	3.02693	7.6136	2.66572e-14	7.84763e-12	ALDH1L2
rna-XM_042247928.1	29.1424	-23.0466	3.02732	-7.61289	2.68042e-14	7.84763e-12	PLXNB2
rna-XM_042249374.1	29.6697	-23.0553	3.0273	-7.61579	2.62081e-14	7.84763e-12	SLC26A2
rna-XM_042230130.1	77.4377	23.0335	3.02664	7.61027	2.73519e-14	7.95565e-12	PPP1R16B
rna-XM_042233495.1	29.0957	-23.0292	3.02732	-7.60711	2.80292e-14	8.0997e-12	MADD
rna-XM_042229678.1	28.6296	-23.0231	3.02734	-7.60507	2.84759e-14	8.1757e-12	LOC101109377
rna-XM_027967074.2	76.4455	23.0128	3.02664	7.6034	2.88441e-14	8.22834e-12	INPP4A
rna-XM_042232360.1	45.9992	23.007	3.02695	7.60073	2.94469e-14	8.34679e-12	LOC101111827
rna-XM_042230596.1	28.1912	-23.0012	3.02736	-7.59777	3.01267e-14	8.48544e-12	CACNB2
rna-XM_042231326.1	28.4517	-22.998	3.02735	-7.59677	3.03619e-14	8.49789e-12	LOC101121964
rna-XM_027974646.2	44.9662	22.9863	3.02697	7.59384	3.10566e-14	8.58435e-12	GABPB2
rna-XM_042233451.1	45.0306	22.9878	3.02696	7.59433	3.09389e-14	8.58435e-12	DGKZ
rna-XM_012098665.4	44.4061	22.9703	3.02698	7.58853	3.23567e-14	8.83397e-12	SIN3A
rna-XM_042251377.1	44.4328	22.971	3.02697	7.58878	3.22935e-14	8.83397e-12	NFXL1
rna-XM_042256995.1	41.992	-22.9643	3.02697	-7.58656	3.28521e-14	8.91455e-12	SLC41A1
rna-XM_012098938.3	43.5885	22.9438	3.02699	7.57974	3.46235e-14	9.29715e-12	FBLN5
rna-XM_042232341.1	43.5838	22.9432	3.02699	7.57953	3.46799e-14	9.29715e-12	AKT1S1
rna-XM_042229939.1	26.793	-22.9301	3.02742	-7.57415	3.61497e-14	9.63313e-12	ZBP1
rna-XM_027975916.2	26.8055	-22.914	3.02742	-7.56882	3.76619e-14	9.81687e-12	ABL2
rna-XM_042229320.1	26.4252	-22.914	3.02743	-7.56879	3.76728e-14	9.81687e-12	CAMSAP2
rna-XM_042248392.1	26.8162	-22.9155	3.02742	-7.56933	3.75155e-14	9.81687e-12	ASNS
rna-XM_042250413.1	26.7758	-22.9134	3.02742	-7.56862	3.77216e-14	9.81687e-12	ZNF692
rna-XM_042244428.1	26.1979	-22.9018	3.02745	-7.56471	3.88725e-14	1.00576e-11	LOC101111609
rna-XM_015101908.3	41.5052	22.876	3.02703	7.55723	4.11754e-14	1.04113e-11	PDE8A
rna-XM_042230869.1	25.7688	-22.8796	3.02747	-7.55735	4.11353e-14	1.04113e-11	ZNF570
rna-XM_042233090.1	27.1323	-22.8828	3.0274	-7.55856	4.07565e-14	1.04113e-11	RIC3
rna-XM_042239415.1	25.7821	-22.8811	3.02747	-7.55784	4.0982e-14	1.04113e-11	DTNA
rna-XM_027963623.2	45.1492	-22.8591	3.02692	-7.55193	4.2884e-14	1.07215e-11	BCORL1
rna-XM_027967323.2	25.4702	-22.864	3.02748	-7.55215	4.28138e-14	1.07215e-11	LOC101115614
rna-XM_027974918.2	25.4082	-22.8608	3.02748	-7.5511	4.31602e-14	1.07302e-11	ARHGEF15
rna-XM_027979934.2	25.1232	-22.8453	3.0275	-7.54593	4.49073e-14	1.11026e-11	CD200
rna-XM_042243297.1	39.8164	22.8181	3.02707	7.53801	4.77198e-14	1.17327e-11	FAM214B
rna-XM_027968494.2	24.5065	-22.8124	3.02753	-7.535	4.88351e-14	1.18757e-11	HIVEP3
rna-XM_042242229.1	24.5408	-22.8137	3.02753	-7.53541	4.86811e-14	1.18757e-11	POLA1
rna-XM_042244464.1	42.0295	22.802	3.02702	7.53281	4.96609e-14	1.20109e-11	EPB41
rna-XM_042248548.1	39.0929	22.7878	3.02708	7.52796	5.15383e-14	1.23976e-11	NRCAM
rna-XM_027964018.2	23.914	-22.7785	3.02756	-7.52372	5.32396e-14	1.2738e-11	SH3YL1
rna-XM_042237812.1	23.712	-22.7672	3.02758	-7.51994	5.48031e-14	1.3042e-11	TSPAN4
rna-XM_042245594.1	37.4175	22.7292	3.02712	7.50852	5.97979e-14	1.41549e-11	SH3GLB2
rna-XM_027967588.2	36.7144	22.7021	3.02714	7.49951	6.40581e-14	1.50831e-11	SMARCC2
rna-XM_042240976.1	22.3638	-22.6883	3.02766	-7.49367	6.69758e-14	1.56872e-11	KAT6B
rna-XM_015093078.3	30.2082	-22.6742	3.02728	-7.48995	6.8901e-14	1.60536e-11	NFX1
rna-XM_015098237.3	22.0929	-22.6722	3.02768	-7.48831	6.97659e-14	1.61704e-11	TGDS
rna-XM_027961399.2	35.6739	22.6654	3.02717	7.48734	7.02821e-14	1.62057e-11	ZSCAN25
rna-XM_027967044.2	35.1683	22.6453	3.02718	7.48066	7.39502e-14	1.69636e-11	MAP4K4
rna-XM_042244430.1	35.1146	22.6391	3.02718	7.47862	7.51097e-14	1.71412e-11	LOC101111609
rna-XM_042243901.1	34.9014	22.6315	3.02719	7.47607	7.6577e-14	1.73869e-11	RIF1
rna-XM_027961323.2	66.5421	22.6119	3.02671	7.47078	7.97191e-14	1.80084e-11	LOC101112441
rna-XM_027974326.2	34.0501	22.5989	3.02721	7.46525	8.31431e-14	1.8687e-11	B3GNTL1
rna-XM_042240201.1	37.3916	22.5929	3.02712	7.46348	8.42658e-14	1.88442e-11	GIGYF1
rna-XM_042244118.1	33.8696	22.5913	3.02722	7.46272	8.47557e-14	1.8859e-11	PIKFYVE
rna-XM_027974459.2	33.7064	22.5826	3.02723	7.45984	8.66279e-14	1.91797e-11	CD300LG
rna-XM_042239270.1	20.6577	-22.5802	3.02778	-7.45768	8.80622e-14	1.94007e-11	TCF4
rna-XM_042229712.1	33.0912	22.5601	3.02724	7.45236	9.1682e-14	2.00987e-11	WDR37
rna-XM_042246885.1	42.1754	22.5529	3.02702	7.45054	9.29565e-14	2.02782e-11	KIF21A
rna-XM_042251255.1	32.8623	22.5505	3.02725	7.44915	9.39408e-14	2.0393e-11	HERC3
rna-XM_042252400.1	32.7238	22.5409	3.02726	7.446	9.62142e-14	2.07851e-11	CGNL1
rna-XM_042243645.1	31.456	22.4893	3.0273	7.42883	1.09559e-13	2.35536e-11	CALCRL
rna-XR_003590504.2	30.7011	22.4551	3.02733	7.41745	1.19392e-13	2.55443e-11	CLYBL
rna-XM_042257263.1	31.1406	22.4526	3.02731	7.41668	1.20095e-13	2.55716e-11	LOC101112585
rna-XR_006056188.1	37.7139	-8.65981	1.16848	-7.41115	1.25207e-13	2.65331e-11	LOC101122718
rna-XM_027956721.2	29.6566	22.4076	3.02737	7.40168	1.34476e-13	2.83623e-11	AP1B1
rna-XM_042237416.1	29.4973	22.3995	3.02737	7.39899	1.37225e-13	2.88056e-11	CCHCR1
rna-XR_001041588.4	29.3501	22.3923	3.02738	7.39658	1.39738e-13	2.91954e-11	PLA2G4F
rna-XM_012162984.4	29.1232	22.3784	3.02739	7.39199	1.44647e-13	3.00798e-11	GOLGA1
rna-XM_042241998.1	28.0393	22.3249	3.02743	7.37421	1.6532e-13	3.41216e-11	UBA1
rna-XM_042243624.1	27.9404	22.3243	3.02744	7.37397	1.65616e-13	3.41216e-11	PMS1
rna-XM_042242054.1	27.8682	22.318	3.02744	7.3719	1.68208e-13	3.44959e-11	TMEM164
rna-XM_042234755.1	27.5534	22.3041	3.02746	7.36728	1.74148e-13	3.55502e-11	HPS4
rna-XM_012098857.4	27.2402	22.2896	3.02747	7.36243	1.80587e-13	3.66962e-11	MIA2
rna-XR_003588833.2	26.7304	22.2631	3.0275	7.35364	1.92888e-13	3.90177e-11	PPM1H
rna-XM_042245048.1	26.5192	22.2519	3.02751	7.34992	1.98332e-13	3.99374e-11	GMEB1
rna-XM_042246623.1	26.2493	22.2335	3.02752	7.34379	2.07632e-13	4.16218e-11	NCKAP1L
rna-XM_042257117.1	25.885	22.2153	3.02754	7.33775	2.17215e-13	4.33476e-11	SUSD4
rna-XM_042250714.1	25.7393	22.2078	3.02755	7.33523	2.21337e-13	4.39729e-11	ZFYVE16
rna-XM_042233204.1	25.656	22.2044	3.02755	7.33412	2.2319e-13	4.4144e-11	ATG16L2
rna-XM_042238860.1	25.5533	22.1965	3.02756	7.33148	2.27628e-13	4.48226e-11	PLEKHA1
rna-XM_042231157.1	25.4437	22.1917	3.02756	7.32988	2.30362e-13	4.5161e-11	LOC101110828
rna-XM_042250205.1	27.4597	22.1793	3.02746	7.32604	2.37061e-13	4.60685e-11	LOC101119303
rna-XM_042256660.1	25.1979	22.1807	3.02758	7.32623	2.36716e-13	4.60685e-11	PER1
rna-XM_042251743.1	24.9851	22.1096	3.02759	7.3027	2.82046e-13	5.45722e-11	FGFR3
rna-XM_042254395.1	23.6869	22.0945	3.02766	7.29752	2.9311e-13	5.64675e-11	ZNF687
rna-XM_012179798.4	24.5001	22.0829	3.02762	7.29381	3.01299e-13	5.77949e-11	TBC1D1
rna-XM_042243062.1	23.4986	22.0804	3.02768	7.29284	3.03482e-13	5.79638e-11	TUT7
rna-XM_042245503.1	22.8392	22.0413	3.02772	7.27983	3.34243e-13	6.35662e-11	TSC1
rna-XM_042239191.1	21.6212	21.9645	3.02781	7.25426	4.03869e-13	7.64807e-11	D2HGDH
rna-XM_042235715.1	71.0624	21.9427	3.02668	7.24978	4.17463e-13	7.87201e-11	CTNNB1
rna-XM_027975387.2	38.5727	-21.8125	3.02704	-7.20588	5.76681e-13	1.08285e-10	CUEDC1
rna-XM_015099878.3	18.2692	21.7272	3.0281	7.17518	7.22143e-13	1.35029e-10	LOC105616741
rna-XM_042244469.1	17.8561	21.7016	3.02815	7.16663	7.68676e-13	1.43128e-10	EPB41
rna-XM_042234867.1	20.3496	-7.76894	1.09778	-7.07699	1.47323e-12	2.73173e-10	C17H22orf15
rna-XM_042236117.1	37.2023	21.3773	3.02713	7.0619	1.64238e-12	3.03274e-10	PBRM1
rna-XM_012130457.4	32.6558	21.1819	3.02726	6.99704	2.6142e-12	4.80732e-10	WDR33
rna-XM_012182992.4	43.1086	20.8735	3.027	6.89577	5.3572e-12	9.81095e-10	ADGRG6
rna-XM_042234385.1	55.4326	-4.32464	0.633111	-6.83078	8.44537e-12	1.54031e-09	RAPGEF2
rna-XM_015097958.3	8.71037	6.62832	0.987234	6.71403	1.89324e-11	3.4389e-09	FGF14
rna-XM_042254041.1	56.243	4.44633	0.670179	6.63455	3.2549e-11	5.88819e-09	PTK2
rna-XM_042249264.1	30.326	-8.34467	1.31807	-6.331	2.43584e-10	4.38866e-08	AGAP3
rna-XM_042256817.1	14.4747	-7.27739	1.15803	-6.28429	3.29363e-10	5.91021e-08	RORC
rna-XM_004004922.5	1785.62	-14.2251	2.27331	-6.25742	3.91406e-10	6.99532e-08	TMBIM1
rna-XM_042241908.1	81.3626	-3.88248	0.654916	-5.92821	3.06248e-09	5.45147e-07	ZBED1
rna-XM_027974418.2	46.4742	3.96791	0.694669	5.71194	1.11696e-08	1.98035e-06	ECM1
rna-XM_042248302.1	337.568	5.91856	1.06758	5.54393	2.95762e-08	5.22302e-06	CFTR
rna-XM_027965345.2	53.3398	-9.15973	1.67617	-5.46468	4.63741e-08	8.15707e-06	BSDC1
rna-XM_027961076.2	499.9	0.856749	0.159816	5.36085	8.28311e-08	1.45124e-05	KDSR
rna-XM_004016383.5	174.663	10.9608	2.04805	5.35181	8.7078e-08	1.51966e-05	TCP11L1
rna-XM_042230951.1	143.276	10.6751	2.01134	5.30745	1.11171e-07	1.93255e-05	ARHGEF1
rna-XM_012107575.4	160.506	3.39129	0.64234	5.27959	1.29472e-07	2.24193e-05	COL4A6
rna-XM_027970457.2	8.75446	-6.54973	1.24321	-5.26842	1.37607e-07	2.37356e-05	THG1L
rna-XM_027966450.2	111.645	10.3152	1.98056	5.20825	1.90627e-07	3.2754e-05	SCAI
rna-XM_042256152.1	130.881	-10.455	2.06451	-5.06415	4.10225e-07	7.02148e-05	TANC2
rna-XM_027956850.2	1604.3	-0.388341	0.0772264	-5.02861	4.94054e-07	8.4239e-05	GUCD1
rna-XM_042255599.1	6.12875	-5.4235	1.08745	-4.98736	6.12086e-07	0.000103966	CHRNE
rna-XM_042247930.1	118.595	-6.13925	1.23306	-4.97888	6.39527e-07	0.000108214	PLXNB2
rna-XM_042252750.1	5.98035	-5.39869	1.08529	-4.97442	6.54425e-07	0.000110315	PTGR2
rna-XM_042239787.1	154.083	10.78	2.1693	4.96932	6.7188e-07	0.00011283	SMG1
rna-XM_042230712.1	7.65096	-6.36124	1.2873	-4.94152	7.75169e-07	0.000129686	FLT3LG
rna-XM_042234477.1	81.136	9.27566	1.88374	4.92406	8.47677e-07	0.000141286	EP400
rna-XM_042250344.1	192.657	3.87601	0.791231	4.8987	9.64717e-07	0.000160193	CDHR2
rna-XM_042234485.1	67.5271	9.01041	1.84843	4.87463	1.09014e-06	0.000180346	EP400
rna-XM_042257432.1	36.5347	1.48071	0.306377	4.83296	1.34518e-06	0.000221715	FBLIM1
rna-XM_027971161.2	224.866	6.93298	1.43544	4.82988	1.36615e-06	0.000224341	AFF1
rna-XM_027966370.2	56.7264	9.33827	1.94173	4.80925	1.515e-06	0.000247869	CERCAM
rna-XM_042234478.1	139.215	7.02626	1.46347	4.8011	1.57796e-06	0.000257226	EP400
rna-XM_012100569.4	62.3433	3.82739	0.798543	4.79296	1.64336e-06	0.000266201	STK38
rna-XM_027974600.2	43.7288	-8.2928	1.73027	-4.79276	1.64499e-06	0.000266201	GRB7
rna-XM_042254103.1	48.503	-6.15747	1.28932	-4.77573	1.79052e-06	0.000288702	CYRIB
rna-XM_015101078.3	894.703	1.27959	0.2687	4.76215	1.91542e-06	0.000307726	RAB6A
rna-XM_027977127.2	76.9033	-9.68791	2.04429	-4.73901	2.14768e-06	0.000343799	CEP250
rna-XM_042247642.1	49.1148	-9.04102	1.91598	-4.71874	2.37305e-06	0.000378514	TSPAN11
rna-XM_027966517.2	65.0064	-9.44537	2.0058	-4.70903	2.48895e-06	0.000395583	CYS1
rna-XM_012096467.3	54.8312	-9.19998	1.95482	-4.7063	2.52254e-06	0.000399494	CEP19
rna-XM_012179770.4	239.292	5.74862	1.22622	4.68807	2.75798e-06	0.000435233	RBPJ
rna-XM_012186976.4	54.9271	-9.20243	1.96967	-4.67208	2.9817e-06	0.000468875	LOC101119740
rna-XM_042254934.1	124.946	-10.3881	2.22965	-4.65905	3.17668e-06	0.000497778	ZBTB7B
rna-XM_042246395.1	43.0396	-8.8506	1.90116	-4.65536	3.23417e-06	0.000505007	MAP4K4
rna-XM_012180284.4	52.9102	9.2379	1.98757	4.64784	3.3543e-06	0.000521935	HELQ
rna-XM_015100972.3	34.5814	8.62421	1.86449	4.62549	3.73707e-06	0.000579468	SCN3B
rna-XM_027976479.2	95.3822	-9.99858	2.16226	-4.62413	3.76181e-06	0.000581278	ISG20L2
rna-XM_042239048.1	32.8191	8.54909	1.8515	4.61738	3.88617e-06	0.000598417	LOC101115746
rna-XM_042230993.1	172.472	-6.37143	1.38334	-4.60582	4.10837e-06	0.000630451	MYH14
rna-XM_027973825.2	270.912	2.30485	0.504763	4.56619	4.96663e-06	0.000759536	TFDP1
rna-XM_027965076.2	107.767	-3.87479	0.850051	-4.5583	5.15697e-06	0.000785943	FAM126B
rna-XM_027959972.2	32.813	8.54843	1.87658	4.55531	5.23074e-06	0.000794466	CRACR2B
rna-XM_027967527.2	3.4352	-5.2018	1.14616	-4.53845	5.66683e-06	0.000857774	DTX3
rna-XM_027962445.2	1502.21	0.196296	0.0434774	4.51489	6.33496e-06	0.000955656	TOMM20
rna-XM_042241984.1	21.3507	7.34463	1.6285	4.51007	6.48072e-06	0.000974342	NONO
rna-XM_027962903.2	36.4416	2.42275	0.54242	4.46656	7.94878e-06	0.00119041	RPGR
rna-XM_027965632.2	33.7097	3.91875	0.877473	4.46595	7.97138e-06	0.00119041	EMC1
rna-XM_042250479.1	171.684	-0.870112	0.195961	-4.44024	8.98592e-06	0.00133743	LOC101117758
rna-XM_012180846.4	23.3104	1.8761	0.423439	4.43062	9.39642e-06	0.00139386	ANXA9
rna-XM_012098939.4	31.2365	-8.38787	1.89991	-4.41488	1.01067e-05	0.00149425	FBLN5
rna-XM_042241670.1	32.226	-8.43293	1.91333	-4.40745	1.04594e-05	0.00154127	CCNB3
rna-XM_027967735.2	18.7033	-7.06117	1.6029	-4.40525	1.0566e-05	0.00155184	LOC105605770
rna-XM_042234161.1	30.9836	8.4661	1.93154	4.38308	1.17013e-05	0.00171293	GUCD1
rna-XM_027979961.2	27.487	5.60163	1.2804	4.37492	1.21479e-05	0.00177248	NEPRO
rna-XM_012186335.4	33.1189	-8.47269	1.93748	-4.37305	1.22524e-05	0.00178188	PECAM1
rna-XM_027960272.2	50.7236	7.05255	1.61302	4.37228	1.22956e-05	0.00178234	AMOTL2
rna-XM_015093111.3	29.7104	-8.31587	1.90366	-4.36836	1.25184e-05	0.00180875	BMP1
rna-XM_027970729.2	67.7247	9.59403	2.20205	4.35687	1.31935e-05	0.00190011	KIT
rna-XM_012101765.3	22.1964	4.18805	0.961987	4.35354	1.33956e-05	0.001923	PRMT3
rna-XM_042233188.1	253.658	5.5563	1.27715	4.35055	1.35798e-05	0.00194318	INPPL1
rna-XM_012186506.4	75.5375	-5.01099	1.15737	-4.32963	1.49363e-05	0.00213044	TNRC6C
rna-XM_042245837.1	79.8569	6.59699	1.52519	4.32536	1.5228e-05	0.00216511	LDAH
rna-XM_027965633.2	33.3584	7.41029	1.71606	4.31821	1.57297e-05	0.00222931	EMC1
rna-XM_042255938.1	67.4632	-9.49902	2.20649	-4.30503	1.66963e-05	0.00235879	IKZF3
rna-XM_042254515.1	60.8578	6.29659	1.4652	4.29744	1.72783e-05	0.00243328	WWP1
rna-XM_027957692.2	22.3168	-7.90327	1.83984	-4.29563	1.74198e-05	0.00244548	MAP4
rna-XM_015101074.3	18.5858	-7.63956	1.77985	-4.29225	1.76875e-05	0.00247525	P2RY6
rna-XM_012186513.3	619.355	1.19892	0.280881	4.26843	1.9685e-05	0.00274615	MFSD11
rna-XM_042244376.1	33.4343	7.41397	1.73796	4.2659	1.99101e-05	0.00276887	SP110
rna-XM_042247776.1	22.47	-4.9728	1.16793	-4.25777	2.06473e-05	0.00286244	SGSM3
rna-XM_042252737.1	18.366	-7.62205	1.79284	-4.25138	2.12458e-05	0.00293628	NUMB
rna-XM_042246879.1	106.395	9.08921	2.14342	4.24052	2.23007e-05	0.00307252	KIF21A
rna-XM_012096752.4	11.9961	-2.91031	0.686745	-4.23784	2.25683e-05	0.00309979	LOC101112162
rna-XM_042237351.1	179.725	5.44669	1.28704	4.23194	2.31685e-05	0.00317244	CUL7
rna-XM_042250692.1	3.54781	-5.2482	1.24828	-4.20434	2.61843e-05	0.0035744	PWWP2A
rna-XM_012102717.4	18.8765	7.75043	1.85171	4.18556	2.84462e-05	0.0038713	MORN4
rna-XM_042251604.1	26.6415	8.24808	1.9772	4.17159	3.02486e-05	0.00410404	ARHGAP24
rna-XM_042237017.1	99.8319	-6.95108	1.66809	-4.16709	3.08515e-05	0.00417311	RAB23
rna-XM_042231449.1	30.1167	2.93814	0.707097	4.15522	3.24981e-05	0.00436927	IL34
rna-XM_042236218.1	290.348	-3.82332	0.920021	-4.15569	3.24313e-05	0.00436927	DAG1
rna-XM_042250398.1	237.759	-5.25514	1.27031	-4.13691	3.52021e-05	0.00471857	LOC101112480
rna-XM_042235713.1	67.6397	-8.34394	2.01816	-4.13442	3.55847e-05	0.00475553	CTNNB1
rna-XM_042235286.1	44.1199	-8.88648	2.15213	-4.12916	3.64086e-05	0.00485107	PRKD1
rna-XM_042245638.1	6.14082	6.13343	1.48725	4.124	3.72346e-05	0.00494631	URM1
rna-XM_027966737.2	84.412	-0.90651	0.220407	-4.11289	3.90736e-05	0.00517516	RNF181
rna-XM_042230308.1	2.83658	-4.91685	1.1977	-4.10522	4.03923e-05	0.00533393	CDC123
rna-XM_027966407.2	17.6506	-7.564	1.84445	-4.10095	4.11456e-05	0.00541735	ST6GALNAC4
rna-XM_012180998.4	3.94451	-4.79114	1.16944	-4.09694	4.18643e-05	0.00549571	RBM23
rna-XM_042234797.1	245.666	8.02122	1.95836	4.09588	4.20562e-05	0.00550466	MECOM
rna-XM_027969408.2	15.7191	7.48737	1.83258	4.08571	4.39431e-05	0.00573044	SSBP4
rna-XM_042249996.1	13.3715	4.7881	1.17206	4.0852	4.40387e-05	0.00573044	ZNF557
rna-XM_015092210.3	13.3136	-7.15797	1.75385	-4.08129	4.4787e-05	0.00579393	ANKRD35
rna-XM_042240857.1	126.27	3.92017	0.960392	4.08184	4.46807e-05	0.00579393	TAF5L
rna-XM_004021043.5	55.0664	5.66619	1.39191	4.07079	4.6854e-05	0.00604375	ZNF789
rna-XM_042242900.1	98.0115	-10.0379	2.46813	-4.06701	4.76209e-05	0.00612493	ECPAS
rna-XM_012179795.4	31.2301	8.47678	2.08929	4.05725	4.96534e-05	0.00636794	PGM2
rna-XR_006057704.1	3.76716	4.18293	1.03546	4.03968	5.35238e-05	0.00684459	LOC121817654
rna-XM_012097430.4	40.4714	3.97449	0.986415	4.02923	5.59607e-05	0.00713571	GAB1
rna-XM_042235192.1	84.3594	6.66765	1.65829	4.0208	5.79998e-05	0.00737459	SCAPER
rna-XM_042252721.1	49.1919	-1.16808	0.291568	-4.00621	6.17016e-05	0.00782292	RGS6
rna-XM_042238603.1	31.2617	3.57305	0.894898	3.99269	6.53279e-05	0.00825915	PDCD4
rna-XM_042236271.1	286.232	-2.07975	0.521662	-3.98677	6.69783e-05	0.00844382	PLXNB1
rna-XM_042245448.1	22.9186	-7.94115	1.99507	-3.98038	6.88045e-05	0.00864954	ENTR1
rna-XM_042255981.1	121.539	-9.1592	2.30627	-3.97143	7.1442e-05	0.00895581	EZH1
rna-XM_012177138.3	88.1979	3.74275	0.94302	3.9689	7.22063e-05	0.00902619	TMEM209
rna-XM_012100128.4	26.2328	-8.13623	2.05079	-3.96736	7.26743e-05	0.00905924	MAP4
rna-NM_001082594.1	31.8011	2.11097	0.534307	3.95086	7.78721e-05	0.0096305	IL13
rna-XM_012142484.4	17.1396	-7.52257	1.90393	-3.95107	7.78032e-05	0.0096305	CASP8
rna-XM_012177551.4	81.1854	-3.08651	0.781246	-3.95075	7.79062e-05	0.0096305	SLC26A2
gene-LOC114116426	9.80512	6.80492	1.72306	3.94932	7.83729e-05	0.00963865	LOC114116426
rna-XM_027971887.2	47.111	-1.92759	0.488094	-3.94922	7.84053e-05	0.00963865	KTN1
rna-XM_027966376.2	16.0545	-7.42844	1.88407	-3.94276	8.05483e-05	0.00987483	URM1
gene-LOC106991597	3.717	-4.09666	1.04151	-3.93339	8.37556e-05	0.0102398	LOC106991597
rna-XM_042244259.1	5.01114	-5.74543	1.46316	-3.92673	8.6107e-05	0.0104984	ABCB6
rna-XM_042248012.1	33.9084	7.4331	1.89426	3.92402	8.70845e-05	0.0105886	ABO
rna-XM_027978482.2	35.0894	6.17945	1.57514	3.9231	8.74157e-05	0.0105999	PPP1R13L
rna-XM_027969301.2	432.357	-0.455234	0.117003	-3.89079	9.99197e-05	0.0120832	LOC101121892
rna-XM_042247774.1	14.7969	-7.30988	1.88342	-3.88117	0.000103957	0.0125373	SGSM3
rna-XM_012099120.4	17.4336	-1.28611	0.331628	-3.87818	0.000105242	0.0126581	LOC101119588
rna-XM_042239983.1	493.164	-0.87418	0.22547	-3.87715	0.000105686	0.0126772	IL4R
rna-XM_027956842.2	48.7726	-1.39916	0.361952	-3.8656	0.000110816	0.0132568	LOC101118990
rna-XM_027961611.2	95.6576	7.92208	2.04974	3.86492	0.000111125	0.0132582	ABCC1
rna-XM_042254389.1	8.9355	-6.58302	1.70451	-3.86211	0.000112412	0.0133759	EMC2
rna-XM_012116602.4	294.301	-1.94974	0.505899	-3.854	0.000116201	0.0137532	PTCH1
rna-XM_042253919.1	12.8269	-7.10545	1.84362	-3.85408	0.000116166	0.0137532	BOP1
rna-XM_042233537.1	121.273	9.27803	2.40903	3.85136	0.000117464	0.0138658	CELF1
rna-XM_004010395.5	162.969	2.16695	0.562931	3.84941	0.000118403	0.0139029	LOC101116991
rna-XM_042238388.1	76.0672	-3.53698	0.918691	-3.85002	0.00011811	0.0139029	LOC101118490
rna-XM_012162676.4	1296.66	0.551149	0.143232	3.84794	0.000119114	0.0139494	PATJ
rna-XM_042236373.1	24.2198	8.11066	2.11264	3.83911	0.000123479	0.0144227	LOC101103766
rna-XM_027973376.2	15.0259	-7.33296	1.91404	-3.83115	0.000127548	0.014859	PUF60
rna-XM_027957680.2	602.822	-0.636489	0.166323	-3.82683	0.000129803	0.0150822	SHISA5
rna-XM_042239849.1	21.874	-7.87428	2.06156	-3.81958	0.000133681	0.0154924	FAM234A
rna-XM_042241701.1	261.336	11.5421	3.02632	3.8139	0.000136793	0.0157709	HUWE1
rna-XR_006060691.1	6.02716	-4.29616	1.12627	-3.81449	0.000136467	0.0157709	TCP10L
rna-XM_042241996.1	16.527	4.56767	1.19882	3.81015	0.000138882	0.0159703	TMEM187
rna-XM_004011352.5	27.6774	8.30294	2.18322	3.80307	0.000142915	0.0163918	SGK1
rna-XM_004004369.5	12.9591	7.20818	1.89581	3.80217	0.000143432	0.0164088	IL33
rna-XM_027965585.2	701.629	3.97869	1.04664	3.8014	0.000143881	0.0164179	LOC101107420
rna-XM_042231506.1	20.3524	7.85865	2.06841	3.79937	0.000145065	0.0165107	TAF1C
rna-XM_042252263.1	64.163	8.3578	2.20276	3.79424	0.000148097	0.0168127	BUB1B
rna-XM_042246328.1	31.8825	4.54067	1.19698	3.79343	0.000148578	0.0168245	ZNF638
rna-XM_012140185.4	10.7474	-6.84844	1.80579	-3.7925	0.000149141	0.0168454	EPB41L5
rna-XR_006057331.1	27.9535	4.95627	1.30774	3.78995	0.000150677	0.0169758	LOC121817423
rna-XM_042234525.1	30.3698	-8.3472	2.20776	-3.78085	0.000156293	0.017564	NCOR2
rna-XM_027960563.2	102.29	9.61049	2.54362	3.77827	0.000157924	0.0177026	TBC1D12
rna-XM_027962414.2	24.085	3.8769	1.02677	3.77582	0.000159482	0.0178324	NUDT13
rna-XM_027969711.2	42.9704	5.77541	1.531	3.77232	0.000161739	0.0180394	PNPLA6
rna-XM_012103661.4	12.2853	-3.85328	1.02265	-3.76794	0.000164601	0.0183127	HDHD2
rna-NM_001024860.1	8.50109	-6.50947	1.72837	-3.76624	0.000165722	0.0183457	TNF
rna-XM_042254173.1	52.2672	-7.9708	2.11631	-3.76637	0.000165639	0.0183457	SPIDR
rna-XM_042232175.1	34.0835	-7.93246	2.10805	-3.76294	0.000167931	0.018544	KLC3
rna-XM_042255875.1	19.1057	-7.67894	2.04422	-3.75641	0.000172369	0.018987	CBX1
rna-XM_042240288.1	35.7862	8.67378	2.31124	3.75287	0.000174819	0.0192094	EARS2
rna-XM_042231462.1	63.326	-8.82817	2.35499	-3.74871	0.000177745	0.0194828	LOC101108803
rna-XM_012104722.4	251.647	-0.362052	0.0968845	-3.73694	0.000186271	0.0203672	PRMT2
rna-XM_042252103.1	10.6042	-6.83073	1.82954	-3.73357	0.000188783	0.0205913	PAQR5
rna-XR_006055808.1	9.67817	4.53265	1.21526	3.72978	0.000191643	0.0208521	NDUFAF5
rna-XM_042256277.1	11.7729	7.06887	1.90348	3.71366	0.000204283	0.0221731	CYTH1
rna-XM_027960293.2	185.787	-1.58036	0.426055	-3.70927	0.000207854	0.0225059	IFIT3
rna-XM_042253039.1	40.9547	3.0604	0.826442	3.70311	0.000212975	0.0230044	IGSF3
rna-XM_042243310.1	1.65358	-4.13192	1.11599	-3.70249	0.000213496	0.0230048	LOC121818624
rna-XM_042253943.1	10.512	-6.81744	1.84389	-3.69731	0.0002179	0.0234226	SCRIB
rna-XM_012149068.4	129.246	3.75791	1.01662	3.69648	0.000218611	0.0234301	LOC101111609
rna-XM_042230870.1	31.4965	4.22352	1.14273	3.696	0.000219022	0.0234301	LOC101122457
rna-XM_042231960.1	73.7438	0.850231	0.230529	3.68817	0.000225871	0.0241048	PDCD2L
id-LOC114115785	2.30186	-3.98182	1.08039	-3.68554	0.000228218	0.024297	LOC114115785
rna-XR_006056738.1	5.95564	6.08572	1.6531	3.68141	0.00023195	0.0246354	LOC121816974
gene-LOC101113300	3.92752	2.85505	0.776206	3.67821	0.000234876	0.0248868	LOC101113300
rna-XM_042250428.1	26.8972	8.26121	2.24966	3.6722	0.000240469	0.0254189	POLRMT
rna-XM_042237599.1	40.6805	1.17184	0.319169	3.67155	0.000241087	0.0254238	RRP1B
rna-XM_042251044.1	163.623	-7.78155	2.12045	-3.66976	0.000242774	0.0255412	CLOCK
rna-XM_027968896.2	99.9223	2.02455	0.552918	3.66157	0.000250673	0.02631	TCAF2
rna-XM_027978064.2	3.17104	5.16388	1.41098	3.65979	0.000252423	0.0264313	FHOD1
rna-XM_042245884.1	26.6577	5.27141	1.44235	3.65474	0.000257439	0.0268933	DNMT3A
rna-XM_042248377.1	185.541	11.0479	3.02638	3.65055	0.000261683	0.0272727	LOC114114485
rna-XR_006057703.1	6.94855	-6.22164	1.70964	-3.63915	0.000273537	0.0284415	LOC121817654
rna-XM_042244252.1	85.1023	-4.30025	1.18225	-3.63733	0.000275475	0.0285762	TTLL4
rna-XM_027971770.2	106.27	-5.37125	1.47755	-3.63524	0.000277719	0.0287419	TLN2
rna-XM_027978658.2	22.0392	5.362	1.47632	3.632	0.000281231	0.0289091	LOC114118018
rna-XM_027980011.2	328.13	0.590522	0.162591	3.63195	0.000281282	0.0289091	BTF3
rna-XM_042256904.1	190.004	-10.9927	3.02636	-3.63231	0.000280895	0.0289091	ZC3H11A
rna-XM_042233248.1	30.937	8.46371	2.33332	3.62732	0.000286379	0.0293651	GDPD5
rna-XM_042229566.1	11.074	3.23859	0.893237	3.62568	0.000288204	0.0294696	CREM
rna-XM_042239957.1	6.74895	-6.17699	1.7039	-3.62521	0.000288723	0.0294696	MSRB1
rna-XM_027961124.2	112.241	6.24903	1.72929	3.61365	0.000301917	0.0306756	ATXN2L
rna-XM_042244184.1	9.59096	-6.68468	1.84966	-3.61401	0.000301498	0.0306756	RPE
rna-XR_001024338.4	7.59823	1.7097	0.474452	3.60353	0.000313919	0.0318224	LOC105604766
rna-XM_027968577.2	28.6153	-2.99561	0.832009	-3.60045	0.000317666	0.0321291	NAPEPLD
rna-XM_027969571.2	695.446	-0.262208	0.0728559	-3.599	0.000319449	0.0321743	WDR83OS
rna-XM_027975343.2	131.838	3.46364	0.962414	3.5989	0.00031956	0.0321743	YPEL2
rna-XM_042251959.1	14.3678	6.18638	1.72158	3.59343	0.000326355	0.0327843	LOC101105161
rna-XM_027957604.2	42.2081	-2.15917	0.60125	-3.59113	0.000329249	0.0329926	SEMA3B
rna-XM_027969497.2	98.1306	-1.55424	0.432862	-3.5906	0.000329911	0.0329926	DDX39A
rna-XM_042236217.1	53.0059	-5.08343	1.41604	-3.58989	0.000330819	0.0330093	IP6K1
rna-XM_042252112.1	12.595	-5.89854	1.64597	-3.58362	0.00033887	0.0337369	KIF23
rna-XM_027966919.2	10.3154	6.88015	1.92076	3.58198	0.000340995	0.0338727	GEMIN6
rna-XM_027957873.2	13.1963	-7.1449	1.9961	-3.57943	0.000344349	0.0341296	TPRA1
rna-XM_012099727.3	516.373	-0.669804	0.187178	-3.57843	0.00034566	0.0341835	MECOM
rna-XM_042238181.1	44.0741	-8.30412	2.32176	-3.57664	0.000348034	0.034342	TBC1D10C
rna-XM_042233302.1	201.8	4.10126	1.14919	3.56883	0.000358574	0.0353037	LGR4
rna-XM_042245869.1	217.479	1.76883	0.496084	3.56559	0.000363036	0.0356641	NCOA1
rna-XM_027973373.2	11.4482	-6.94098	1.94726	-3.56448	0.000364582	0.0357371	PUF60
rna-XM_004006584.5	4180.11	0.315321	0.0884978	3.56304	0.000366589	0.0358436	CS
rna-XM_042241696.1	58.0896	-4.04916	1.13659	-3.56254	0.00036728	0.0358436	ADGRG2
rna-XR_003589201.2	5.23541	-5.81237	1.63248	-3.56045	0.000370214	0.0360509	LOC106991099
rna-XM_027957232.2	219.901	1.62948	0.458308	3.55542	0.00037737	0.0366675	OPA1
rna-XM_027958022.2	3.43551	-5.1986	1.46534	-3.5477	0.000388605	0.0376769	SCN5A
rna-XM_042251269.1	48.1333	-5.93561	1.67344	-3.54695	0.000389719	0.0377027	PPARGC1A
rna-XM_027967903.2	5.94551	-5.99527	1.69283	-3.54157	0.00039776	0.0383972	CLEC2D
rna-XM_004016074.5	327.955	-0.402843	0.113834	-3.53885	0.000401874	0.0387104	IFT46
rna-XM_042237666.1	400.684	-0.940432	0.265806	-3.53804	0.000403116	0.0387461	RBM4B
rna-XM_015100533.3	181.242	0.613356	0.173848	3.52811	0.000418537	0.0401416	ZNF19
rna-XM_004004135.5	612.505	-0.577647	0.16381	-3.52631	0.000421392	0.0403286	UBAP1
rna-XM_042240776.1	36.2229	5.7013	1.61849	3.5226	0.000427336	0.040754	LRRC20
rna-XM_042255011.1	141.824	10.6603	3.02643	3.52239	0.000427669	0.040754	DZIP1
rna-XM_042229633.1	39.4363	-2.61056	0.741277	-3.5217	0.000428783	0.0407729	KIZ
rna-XM_015093322.3	58.71	-8.71922	2.47629	-3.52109	0.000429783	0.0407808	NEMP2
rna-XM_012186044.3	149.609	0.767585	0.218347	3.51543	0.000439044	0.0415709	GRB7
rna-XM_042241135.1	447.291	1.64382	0.468408	3.50936	0.000449179	0.0424402	RHOBTB1
rna-XM_027973375.2	6.51951	-6.12908	1.74728	-3.50779	0.000451853	0.0426024	PUF60
rna-XM_042244636.1	2684.77	1.2186	0.34758	3.50595	0.000454978	0.0427392	ALPL
rna-XM_042250795.1	83.4204	6.52653	1.86164	3.50581	0.000455224	0.0427392	PAM
rna-XM_042236402.1	95.9132	6.78366	1.9369	3.50233	0.00046121	0.04321	IFT122
rna-XM_027968619.2	36.524	-8.61355	2.46384	-3.49598	0.00047232	0.044158	ELMO1
rna-XM_042232982.1	53.1201	5.22929	1.49797	3.49092	0.000481359	0.0449086	ATP13A3
rna-XM_042230671.1	11.6854	-6.96954	1.99791	-3.48842	0.000485883	0.0452359	DZANK1
rna-XM_027958300.2	7.94013	6.49893	1.86415	3.48627	0.000489806	0.0455059	ITIH4
rna-XM_042233828.1	58.1412	-6.83963	1.96298	-3.48431	0.000493406	0.0457449	PRKAA1
rna-XM_042245343.1	204.161	-1.79741	0.516173	-3.48219	0.000497332	0.046013	NSMF
rna-XM_027960802.2	26.7433	2.11989	0.609326	3.47907	0.000503154	0.0464551	ACAA2
rna-XM_027967270.2	464.023	6.06016	1.74716	3.46857	0.000523229	0.0482085	COL6A3
rna-XM_042237110.1	133.584	-10.4844	3.02644	-3.46428	0.000531651	0.0487826	DAAM2
rna-XM_042244717.1	5.21128	5.29065	1.52696	3.46483	0.000530576	0.0487826	SLC66A1
rna-XM_042232738.1	7.31377	6.38211	1.84258	3.46369	0.000532818	0.0487891	RELT
rna-XM_027971504.2	63.4863	-8.83149	2.55131	-3.46155	0.00053707	0.0490774	DENND4A
rna-XM_004017224.5	338.115	-0.619475	0.179979	-3.44193	0.000577588	0.0526134	LOC101111396
rna-XM_042241452.1	18.7803	1.22496	0.355921	3.44167	0.00057813	0.0526134	PURG
rna-XR_006060098.1	6.18268	-6.04977	1.75987	-3.43761	0.000586862	0.0532991	LOC121819799
rna-XM_012185520.4	126.053	-10.4007	3.02645	-3.43662	0.000589029	0.0533869	ANKFY1
rna-XM_042244337.1	16.3426	-5.34278	1.55548	-3.43482	0.000592954	0.0536335	TRIP12
rna-XM_027972452.2	44.7949	8.41757	2.45121	3.43405	0.000594641	0.0536769	PTPRK
rna-XM_042256358.1	22.167	-2.92654	0.852733	-3.43195	0.000599258	0.0539841	UNK
rna-XM_042255342.1	37.0385	3.47879	1.01611	3.42362	0.000617918	0.0555527	BCAS3
rna-XM_027977781.2	35.0622	6.78735	1.98423	3.42065	0.000624724	0.0560513	VPS9D1
rna-XM_042257120.1	80.7718	4.68584	1.37132	3.41703	0.000633093	0.0566879	TP53BP2
rna-XM_042253175.1	113.464	10.3385	3.0265	3.41598	0.000635525	0.0567914	DOP1A
rna-XM_004022495.5	1588.99	0.427856	0.1254	3.41192	0.000645077	0.0575295	ARMCX3
rna-XM_004002570.4	2.9384	5.07252	1.48709	3.41104	0.000647168	0.0576005	DCST1
rna-XM_027978822.2	683.094	-1.39476	0.409098	-3.40935	0.000651173	0.0578413	LENG8
rna-XM_012181250.4	219.296	7.0649	2.07525	3.40437	0.000663169	0.0587895	MGA
rna-XM_042252562.1	40.9559	-1.78393	0.524266	-3.40271	0.0006672	0.0590293	KTN1
rna-XM_004016143.5	288.566	-3.15324	0.927329	-3.40034	0.000673021	0.0593721	LOC101121371
rna-XM_027969849.2	13.9895	-2.28952	0.673485	-3.39951	0.000675077	0.0593721	UBXN6
rna-XM_042253199.1	11.5326	7.04051	2.07083	3.39985	0.000674217	0.0593721	ECHDC1
rna-XM_015099773.3	28.8352	2.23412	0.65754	3.3977	0.00067956	0.0596485	TPD52L2
rna-XM_042236421.1	88.1705	-3.15779	0.929635	-3.3968	0.000681779	0.0597254	TSEN2
rna-XM_042239168.1	95.34	4.24525	1.2505	3.39485	0.000686664	0.0600352	ZNF407
rna-XM_042249092.1	9.70403	-6.70118	1.97601	-3.39127	0.000695696	0.0607056	NOM1
rna-XM_042254469.1	310.506	1.41742	0.418041	3.39064	0.000697303	0.0607268	TP53INP1
rna-XM_027957800.2	1065.79	0.176882	0.0521979	3.38867	0.000702317	0.0609249	EIF2B5
rna-XM_042242020.1	54.0482	8.68891	2.56399	3.38882	0.000701936	0.0609249	CD99L2
rna-XM_042230746.1	12.2551	-3.49863	1.03391	-3.38388	0.000714689	0.0618776	LOC101117269
rna-XM_027961809.2	177.178	2.21515	0.654754	3.38317	0.000716531	0.0619166	GIGYF1
rna-XM_027972638.2	3.72328	-5.32111	1.57743	-3.37328	0.000742783	0.0640607	AGPAT4
rna-XM_027968133.2	169.085	-7.88516	2.33849	-3.37191	0.000746498	0.0641326	MRTFA
rna-XM_042245757.1	40.6152	-7.08467	2.10085	-3.37229	0.000745469	0.0641326	RNF144A
rna-NM_001126360.1	7.99743	2.22884	0.661166	3.37107	0.000748778	0.0641819	PSPH
rna-XM_042255722.1	103.177	10.2013	3.02653	3.37063	0.000749957	0.0641819	RNF112
rna-XM_042254188.1	12.536	7.16046	2.12762	3.36547	0.000764125	0.0652689	PCMTD1
rna-XM_042233469.1	35.6195	1.25391	0.373053	3.36122	0.000775992	0.0661555	ARHGAP1
rna-XM_012190037.4	100.5	10.1634	3.02654	3.35809	0.000784837	0.0667817	NIP7
rna-XM_042250907.1	88.4287	-0.536956	0.160021	-3.35554	0.000792096	0.0672707	SPOCK1
rna-XM_042244382.1	41.9561	-5.40132	1.61108	-3.35261	0.000800542	0.0678585	SP110
rna-XM_027956515.2	25.4533	-3.85655	1.15056	-3.35189	0.000802624	0.0679056	SH2B3
rna-XM_012106728.4	275.202	1.03358	0.308521	3.35012	0.000807763	0.0682108	TFE3
rna-XM_027968039.2	151.644	7.37718	2.20561	3.34473	0.000823632	0.0694191	ERC1
rna-XM_027978129.2	255.566	5.51445	1.65099	3.34008	0.000837539	0.0704578	NFAT5
rna-XM_027957615.2	3.62049	-2.99079	0.895654	-3.33922	0.000840137	0.0705429	CAMKV
rna-XM_042255658.1	95.753	10.0936	3.02655	3.33502	0.000852932	0.0714825	NTN1
rna-XR_006056969.1	19.5491	5.65137	1.6984	3.32747	0.000876381	0.0733096	SLC25A20
rna-XM_027975661.2	502.619	2.22217	0.668082	3.32619	0.000880428	0.0733452	CLSTN1
rna-XM_042240649.1	4.05335	5.53088	1.66301	3.32582	0.000881583	0.0733452	LOC101105127
rna-XM_042241628.1	14.4681	3.74026	1.12463	3.32577	0.000881751	0.0733452	LOC101106743
rna-XM_042229732.1	171.562	7.89891	2.3772	3.32278	0.000891253	0.0739973	RASSF2
rna-XR_003589888.2	32.0246	-0.756381	0.227886	-3.31912	0.000903018	0.0748344	IVD
rna-XM_027977391.2	4.42371	-5.56569	1.67748	-3.31788	0.000907026	0.0750269	GRAMD1A
rna-XM_015104896.3	468.895	0.353766	0.106653	3.31698	0.000909975	0.0751312	TSPYL2
rna-XR_006058889.1	9.4436	3.87607	1.16893	3.31592	0.000913417	0.0752757	RSRP1
rna-XM_004013844.5	754.508	-0.307543	0.0928299	-3.31297	0.000923109	0.0759338	STX6
rna-XM_042253563.1	24.0508	2.97611	0.899184	3.30979	0.00093366	0.0766601	PLAGL1
rna-XR_003586991.2	3.22547	3.36021	1.01617	3.30673	0.000943911	0.077359	LOC105605025
rna-XM_027972126.2	7.6837	2.3753	0.718795	3.30456	0.000951241	0.0778164	TTC7B
rna-XM_042241855.1	25.4964	-0.877476	0.265663	-3.30296	0.000956696	0.077976	LOC114111465
rna-XM_042256054.1	11.6738	-6.96682	2.10897	-3.30342	0.000955148	0.077976	HDAC5
rna-XM_027964248.2	651.595	-1.38	0.418069	-3.30088	0.000963818	0.0784129	TUT7
rna-XM_042232709.1	36.0331	2.55943	0.775855	3.29885	0.000970822	0.0788385	DDX6
rna-XM_015101777.2	46.9502	-1.03604	0.314625	-3.29293	0.000991479	0.0803694	LOC101117021
rna-XM_042234596.1	334.937	0.611149	0.18563	3.2923	0.000993721	0.0804047	ATP2A2
rna-XR_006060884.1	4.40785	5.65155	1.71803	3.28955	0.00100347	0.0810464	SLC26A7
rna-XM_012158633.4	8.59957	1.59601	0.485518	3.28722	0.00101181	0.081453	IFT27
rna-XM_042237808.1	168.091	1.57536	0.479251	3.28712	0.00101217	0.081453	CD151
rna-XM_042252658.1	165.32	6.20104	1.88828	3.28396	0.00102359	0.0822231	PLEKHH1
rna-XM_042229903.1	189.008	-0.560316	0.170711	-3.28225	0.00102981	0.0825245	RPS21
rna-XM_042253644.1	226.545	-6.61412	2.01532	-3.28192	0.00103105	0.0825245	SYNE1
rna-XM_012176714.3	7.89987	6.49428	1.98032	3.27942	0.00104022	0.0825655	DUS4L
rna-XM_027972312.2	85.3807	9.92819	3.02643	3.2805	0.00103623	0.0825655	DOP1A
rna-XM_042234701.1	90.6317	-9.92482	3.02655	-3.27925	0.00104083	0.0825655	GIT2
rna-XM_042237015.1	3.23162	-5.11842	1.56077	-3.27941	0.00104024	0.0825655	LOC101118514
rna-XM_042237661.1	19.464	-3.48579	1.06246	-3.28087	0.00103488	0.0825655	CCS
rna-XM_027967511.2	654.045	0.801979	0.244685	3.2776	0.00104695	0.0827573	RCAN1
rna-XM_042255816.1	44.2721	-4.26396	1.30094	-3.27759	0.00104697	0.0827573	SPATA20
rna-XM_012181067.4	223.261	8.01048	2.44552	3.27557	0.00105449	0.083204	GSK3B
rna-XM_012186042.3	3.24579	-5.12375	1.56553	-3.27284	0.00106472	0.0837004	GRB7
rna-XM_042232073.1	6.18126	-6.04911	1.84853	-3.27239	0.00106643	0.0837004	NUMBL
rna-XM_042248014.1	77.9174	3.56537	1.08937	3.27289	0.00106453	0.0837004	ABO
rna-XM_027975764.2	853.869	0.736058	0.224994	3.27146	0.00106993	0.0838274	GNB1
rna-XM_012136085.4	88.7795	-9.89505	3.02656	-3.2694	0.00107774	0.0841433	BAZ2B
rna-XM_027978515.2	48.0062	-2.60195	0.7958	-3.2696	0.00107698	0.0841433	PPP5C
rna-XM_042251498.1	156.447	-4.98643	1.52595	-3.26775	0.00108405	0.0844879	MOB1B
rna-XM_042256611.1	206.238	-0.878375	0.269382	-3.26071	0.00111134	0.0864627	PLSCR3
rna-XM_042245982.1	86.3701	-9.85527	3.02657	-3.25625	0.00112894	0.0876787	SPRED2
rna-XM_004010335.5	1472.95	0.501638	0.154083	3.25564	0.00113137	0.087715	ACIN1
rna-XM_042229714.1	80.3448	9.8405	3.02382	3.25433	0.00113659	0.087966	WDR37
rna-XM_042254799.1	85.7331	-9.84461	3.02657	-3.25272	0.00114304	0.088312	BRCA2
rna-XM_042243895.1	80.4439	9.84233	3.02662	3.25192	0.00114629	0.0884093	RIF1
rna-XM_004017263.5	83.1099	0.836181	0.257335	3.24939	0.00115653	0.0890445	INTU
rna-XM_042248659.1	51.0721	-1.05245	0.324249	-3.2458	0.00117121	0.090019	LOC101107436
rna-XM_042248600.1	47.805	1.65914	0.51162	3.24291	0.00118316	0.0907813	KIAA0895
rna-XR_003588060.2	52.4937	1.45899	0.450009	3.24213	0.0011864	0.0908726	LOC101123603
rna-XM_004012072.5	87.7323	2.9187	0.902442	3.23423	0.00121973	0.0932653	FNDC3A
rna-XM_042243606.1	21.809	-4.88851	1.51278	-3.23148	0.00123152	0.0940056	ERCC3
rna-XM_042250612.1	82.0626	-9.77463	3.02659	-3.22958	0.00123971	0.0944681	PRELID2
rna-XM_012097571.4	54.0181	4.34361	1.34746	3.22356	0.00126607	0.0955359	ETFDH
rna-XM_012174960.4	71.4373	-0.628416	0.194828	-3.2255	0.00125754	0.0955359	MTERF2
rna-XM_042236531.1	40.9362	-4.35737	1.35177	-3.22344	0.0012666	0.0955359	LOC101118310
rna-XM_042240002.1	15.1824	-2.24158	0.695083	-3.22491	0.00126014	0.0955359	RABEP2
rna-XM_042250173.1	66.0704	-2.82572	0.876342	-3.22445	0.00126215	0.0955359	HMG20B
rna-XM_042253438.1	79.2603	-9.73142	3.01866	-3.22376	0.00126521	0.0955359	LOC101117851
rna-XM_027968652.2	778.701	-0.187217	0.0580908	-3.22283	0.00126929	0.0955766	EBNA1BP2
rna-XM_042229492.1	48.904	-1.81826	0.564387	-3.22165	0.00127455	0.0958105	SYT2
rna-XR_006057696.1	73.3798	9.70965	3.01448	3.221	0.00127744	0.0958665	ENTPD7
rna-XM_012178764.4	73.5943	9.71382	3.01766	3.21899	0.00128643	0.0963781	ABLIM3
rna-XM_012184387.3	66.6687	-3.70266	1.15226	-3.21339	0.00131179	0.0979481	LACC1
rna-XM_042252849.1	43.9338	-6.88521	2.14254	-3.21357	0.00131094	0.0979481	FOXN3
rna-XM_042240038.1	75.3074	-4.35104	1.35443	-3.21245	0.0013161	0.0981056	PDPK1
rna-XM_004014604.5	267.334	-0.335882	0.104656	-3.2094	0.00133013	0.0987845	DNTTIP1
rna-XM_027973371.2	5.19096	-5.80084	1.80714	-3.20996	0.00132755	0.0987845	PUF60
rna-XM_027974333.2	78.2271	-9.71246	3.02661	-3.20902	0.00133187	0.0987845	CEP95
rna-XM_042236498.1	11.2313	1.25776	0.392212	3.20682	0.0013421	0.099378	XYLB
rna-XM_004020817.4	381.084	-0.428074	0.13374	-3.2008	0.00137048	0.100809	THUMPD1
rna-XM_027966460.2	91.1466	-5.37102	1.67739	-3.20201	0.00136472	0.100809	DENND1A
rna-XM_042254741.1	58.9851	-8.14613	2.54484	-3.20104	0.00136931	0.100809	CAB39L
rna-XR_006058755.1	9.01301	5.49649	1.71699	3.20124	0.00136839	0.100809	LOC105609277
rna-XM_042246488.1	76.2369	-9.67521	3.02662	-3.1967	0.00139008	0.102081	NCAPH
rna-XM_012096951.4	75.8854	-9.66855	3.02662	-3.1945	0.00140072	0.102525	PARP8
rna-XM_042255491.1	5.26348	2.53609	0.79378	3.19496	0.00139852	0.102525	SERPINF2
rna-XM_042243643.1	56.6672	6.81133	2.1349	3.19046	0.00142045	0.103798	CALCRL
rna-XM_042251365.1	50.5101	-5.37627	1.68604	-3.1887	0.00142916	0.104263	ATP10D
rna-XM_042250582.1	3.76334	-5.33601	1.67379	-3.18798	0.00143268	0.104349	LOC101122274
rna-XM_027964019.2	5.22596	1.69657	0.532471	3.18623	0.00144142	0.104814	ACP1
rna-XM_004008981.5	104.36	-3.6228	1.13868	-3.18158	0.00146472	0.106161	DCTN4
rna-XM_042240348.1	97.9935	-5.3796	1.69072	-3.18185	0.00146338	0.106161	LRRC8B
rna-XM_042252017.1	42.917	7.21665	2.27142	3.17715	0.00148728	0.107621	LHFPL2
rna-NM_001280695.1	133.064	-0.388608	0.122357	-3.17602	0.00149309	0.107866	PIGF
rna-XM_027964544.2	33.8316	-5.91572	1.86345	-3.1746	0.00150044	0.108221	IL33
rna-XM_042243697.1	135.593	7.45527	2.35044	3.17186	0.00151468	0.109072	WIPF1
rna-XM_042254853.1	29.5564	-1.96185	0.618747	-3.17068	0.00152083	0.109338	PAN3
rna-XM_012096635.4	280.48	0.257048	0.0810896	3.16993	0.00152478	0.109445	PTPMT1
rna-XM_027979342.2	188.308	-8.05733	2.54224	-3.16938	0.00152766	0.109475	GRAMD1B
rna-XM_004006768.4	91.0832	1.29233	0.408518	3.16346	0.00155905	0.111544	FGFR1OP2
rna-XM_004012647.5	370.425	0.792916	0.25156	3.152	0.00162158	0.115291	TNK1
rna-XM_027959302.2	69.5505	-9.5428	3.02666	-3.15291	0.00161651	0.115291	RAD9A
rna-XM_027964973.2	59.6378	9.41057	2.98562	3.15196	0.00162177	0.115291	LYPD6
rna-XM_042242444.1	42.5798	-7.67373	2.43459	-3.15196	0.00162177	0.115291	AMOT
rna-XM_027965382.2	20.1825	5.68405	1.80636	3.14668	0.00165135	0.117207	SERINC2
rna-XM_004013562.5	1087.49	0.346996	0.110313	3.14556	0.00165772	0.117447	SLC41A1
rna-XM_042245646.1	36.6704	3.83144	1.2182	3.14515	0.00166002	0.117447	DNM1
rna-XM_004017266.4	496.439	-0.383038	0.121812	-3.1445	0.00166369	0.11752	SPRY1
rna-XM_042234626.1	58.1014	9.3729	2.9841	3.14095	0.00168401	0.118455	ACAD10
rna-XM_042238514.1	28.9009	-6.17192	1.96508	-3.14079	0.00168492	0.118455	CEP55
rna-XR_006056860.1	2.46269	-4.72947	1.50547	-3.14152	0.00168072	0.118455	LOC121817105
rna-XM_042238812.1	67.4664	-9.49891	3.02668	-3.1384	0.00169875	0.119239	ADD3
rna-XM_042237375.1	249.632	1.29221	0.411866	3.13745	0.00170427	0.119439	BAG6
gene-LOC101105567	4.53306	2.2656	0.723076	3.13328	0.00172867	0.120943	LOC101105567
rna-XM_027957152.2	19.1555	-5.21221	1.66373	-3.13285	0.00173117	0.120943	HYKK
rna-XM_012173604.4	14.5365	-2.02096	0.64558	-3.13045	0.00174536	0.121606	CLEC4F
rna-XR_006058943.1	19.042	2.66791	0.85228	3.13033	0.00174613	0.121606	LOC121818812
rna-XM_004004807.3	22.0228	-7.88422	2.51958	-3.12919	0.00175291	0.121888	SPATS2L
rna-XM_027970995.2	81.6202	-5.08269	1.6249	-3.12801	0.00175996	0.122187	PDGFRA
rna-XM_042243134.1	59.9888	4.31367	1.37971	3.12651	0.00176896	0.122621	SORBS3
rna-XM_004011141.5	107.679	-1.61495	0.516647	-3.12583	0.00177302	0.122634	NCOA7
rna-XM_042241348.1	139.733	-0.828963	0.265221	-3.12556	0.00177467	0.122634	PRIMPOL
rna-XM_042254834.1	11.4581	3.02922	0.97045	3.12146	0.00179958	0.124162	KATNAL1
rna-XM_042254070.1	21.3228	1.86513	0.59792	3.11936	0.00181244	0.124856	ST3GAL1
rna-XM_004013148.5	89.4585	0.52204	0.167611	3.1146	0.00184197	0.126695	MAP2K6
rna-XM_012097431.4	60.2382	9.42495	3.02677	3.11387	0.00184654	0.126789	GAB1
rna-XM_042253679.1	131.923	9.42276	3.02645	3.11347	0.00184903	0.126789	TMEM181
rna-XM_015096168.3	60.1139	-9.33252	3.00003	-3.11081	0.00186573	0.127736	PWWP2A
rna-XM_027962890.2	36.2601	-3.71562	1.19738	-3.10312	0.00191492	0.130903	MMGT1
rna-XM_027977415.2	19.5223	-5.8181	1.87527	-3.10253	0.00191871	0.130961	LOC101122457
rna-XM_012179512.3	16.9038	3.72453	1.20113	3.10085	0.00192967	0.131507	GAR1
rna-XM_027978401.2	1174.41	2.95795	0.954553	3.09878	0.0019432	0.132227	RPS19
rna-XM_012179569.3	13.4461	-4.62588	1.49359	-3.09715	0.0019539	0.132348	INTS12
rna-XM_042251376.1	55.8421	-9.22619	2.97885	-3.09723	0.00195335	0.132348	NFXL1
rna-XR_003589176.2	7.63606	-1.92975	0.623018	-3.09743	0.00195209	0.132348	LOC114114527
rna-XM_027958438.2	19.1429	1.48643	0.480779	3.09172	0.00199003	0.13459	DCDC2
rna-XM_012175145.4	548.423	-0.462826	0.149725	-3.09118	0.00199364	0.13463	FGFR1OP2
rna-XM_027960534.2	53.0653	-9.1526	2.96291	-3.08906	0.0020079	0.135228	CHST15
rna-XR_006058964.1	3.01717	-5.02283	1.62606	-3.08896	0.00200858	0.135228	LOC121818827
rna-XM_027974114.2	1230.97	0.306064	0.0992803	3.08283	0.00205041	0.137836	RNF157
rna-XM_042254296.1	23.2333	-5.5981	1.81686	-3.0812	0.00206169	0.138385	NCOA2
rna-XR_006059266.1	8.00415	2.24124	0.727559	3.0805	0.00206656	0.138503	LOC121819086
rna-XR_006058231.1	65.8551	1.83223	0.595281	3.07792	0.00208449	0.139495	LOC121818163
rna-XM_015099828.3	65.059	-3.25641	1.0585	-3.07645	0.00209484	0.139977	NOL4L
rna-XM_042232889.1	11.1013	3.97971	1.2942	3.07505	0.0021047	0.14023	LOC101104855
rna-XM_042250077.1	5.15955	5.88059	1.91238	3.07501	0.00210493	0.14023	TNFSF9
rna-XM_004015321.4	10.2434	1.29534	0.421431	3.07367	0.00211447	0.140655	OPA3
rna-XM_027965108.2	58.367	-9.29009	3.02675	-3.06933	0.00214543	0.142501	NBEAL1
rna-XM_027971742.2	217.145	-0.639194	0.208332	-3.06815	0.00215389	0.142638	GNG2
rna-XM_042232952.1	3.33894	5.25383	1.71214	3.06858	0.00215079	0.142638	APOA5
rna-XM_015105083.3	23.7512	1.05805	0.34493	3.06743	0.00215907	0.142768	ALG13
rna-XM_042242256.1	6.136	4.93136	1.61077	3.0615	0.00220232	0.145412	RLIM
rna-XM_027980141.2	2.45136	4.81089	1.57219	3.06	0.00221335	0.145924	PDZD2
rna-XM_004007787.4	22.9837	3.13794	1.02605	3.05828	0.00222611	0.146548	KLHL7
rna-XM_012166091.4	32.2986	1.55685	0.509226	3.05728	0.00223357	0.146822	HADHB
rna-XM_012181279.4	26.6219	6.05511	1.98206	3.05495	0.00225096	0.147747	GANC
rna-XM_042235224.1	4.7968	-2.33321	0.764499	-3.05195	0.00227362	0.149014	PPCDC
rna-XM_004015982.4	339.177	0.365344	0.120059	3.04305	0.00234193	0.153064	CCDC82
rna-XR_003591717.2	2.2929	-4.61899	1.5179	-3.04301	0.00234228	0.153064	LOC114118246
rna-XM_015103777.3	55.0434	-9.20548	3.02679	-3.04134	0.0023553	0.153688	TCF4
rna-XM_012097014.3	22.0044	-6.19113	2.03707	-3.03923	0.00237186	0.154542	FYB1
rna-XM_042253688.1	6.44121	-3.02476	0.996964	-3.03398	0.00241354	0.157028	SCNM1
rna-XM_027962227.2	41.9227	8.9019	2.93492	3.0331	0.00242056	0.157212	CHST3
rna-XM_042230804.1	63.7771	-4.2225	1.39251	-3.0323	0.00242695	0.157212	KMT2B
rna-XM_042237511.1	10.3297	6.29302	2.0751	3.03263	0.00242431	0.157212	GMDS
rna-XM_042249936.1	43.2478	8.94697	2.95113	3.03171	0.00243173	0.157292	LOC101117505
rna-XM_027971568.2	43.6004	8.95852	2.95765	3.02893	0.00245421	0.158516	NEO1
rna-XM_027963078.2	301.507	0.639861	0.211344	3.02758	0.00246517	0.158993	REV1
rna-XM_012097784.4	727.905	-1.02514	0.338737	-3.02636	0.0024752	0.15928	ATP2A2
rna-XM_042257024.1	2.65366	4.9184	1.62529	3.02616	0.00247678	0.15928	PFKFB2
rna-XM_042238609.1	13.0173	2.40377	0.79565	3.02114	0.00251827	0.161715	BBIP1
rna-XM_027973236.2	38.957	8.7961	2.91488	3.01765	0.00254742	0.163351	RUNX1T1
gene-LOC114117932	2.51228	-4.74904	1.57405	-3.01707	0.00255227	0.163426	LOC114117932
rna-XM_027968957.2	44.8631	8.9999	2.98405	3.01601	0.00256128	0.163768	REPIN1
rna-XM_042254501.1	42.4733	8.92095	2.96028	3.01355	0.00258211	0.164862	SLC26A7
rna-XM_042250949.1	7.79217	-3.85651	1.28189	-3.00846	0.00262574	0.167201	SMIM33
rna-XR_006056548.1	3.23945	5.2054	1.73029	3.0084	0.00262625	0.167201	B3GNT5
rna-XM_015094917.3	1364.73	0.176633	0.0587335	3.00736	0.00263531	0.167538	LOC101104225
rna-XM_042245956.1	47.2555	9.10138	3.02693	3.0068	0.0026401	0.167603	ARHGAP25
rna-XM_042229614.1	46.2024	4.00801	1.33356	3.00549	0.00265151	0.168087	RIN2
rna-XM_042247331.1	46.6731	-8.96749	2.98483	-3.00435	0.00266146	0.168478	ERGIC2
rna-XM_012179428.4	13.7747	6.12389	2.03923	3.00303	0.00267303	0.168731	CAMK2D
rna-XM_015103248.3	47.6319	-8.99662	2.99544	-3.00344	0.00266949	0.168731	NAP1L4
rna-XM_042251257.1	41.2981	-8.79089	2.92907	-3.00125	0.00268871	0.16948	HERC6
rna-XR_006058193.1	7.58469	-3.64087	1.21332	-3.00076	0.00269306	0.169514	LOC121818086
rna-XM_027977732.2	524.75	-0.486297	0.162243	-2.99733	0.00272353	0.17119	ZC3H18
rna-XM_042247037.1	5.29984	-4.60541	1.53706	-2.99626	0.00273315	0.171552	R3HDM2
rna-XM_027968051.2	36.08	8.68548	2.89924	2.99578	0.00273742	0.171579	LOC101117325
rna-XM_004007770.5	2257.58	0.356255	0.118961	2.99473	0.00274688	0.17176	BZW2
rna-XM_042233821.1	43.2946	-8.85903	2.95833	-2.9946	0.00274803	0.17176	C16H5orf51
rna-XM_042255143.1	3.90104	-5.38347	1.79885	-2.99272	0.002765	0.172578	SPART
rna-XM_042236440.1	44.3911	5.15276	1.72267	2.99115	0.00277932	0.173229	SLC6A6
rna-XM_042229888.1	56.6743	2.62959	0.880682	2.98585	0.00282789	0.176009	LOC101112800
rna-XM_027957640.2	37.4702	-6.33413	2.12279	-2.98388	0.00284621	0.176903	CCDC71
rna-XM_042247079.1	33.5252	0.599176	0.200897	2.9825	0.00285907	0.177453	ST3GAL3
rna-XM_027958840.2	413.072	-1.44355	0.484319	-2.98057	0.00287715	0.178327	BAG6
rna-XR_006059080.1	88.5509	-0.8327	0.279501	-2.97924	0.00288964	0.178852	LOC121818997
rna-XM_027957567.2	36.5276	8.70321	2.92177	2.97874	0.00289437	0.178896	PCBP4
rna-XM_042236226.1	445.153	0.945225	0.317656	2.97563	0.00292391	0.180471	LOC101106719
rna-XM_027979486.2	209.84	-0.41377	0.139209	-2.97229	0.00295584	0.182189	ANAPC15
rna-XM_027971565.2	37.8114	8.75296	2.94713	2.96999	0.00297808	0.183214	NEO1
rna-XM_042248435.1	36.9182	8.7185	2.9358	2.96972	0.00298069	0.183214	MACC1
rna-XM_012190049.4	315.809	-1.09397	0.368436	-2.96922	0.00298553	0.183258	IST1
rna-XR_006059636.1	8.14905	1.83912	0.61949	2.96877	0.00298998	0.183279	LOC121819404
rna-XM_012182970.4	52.3239	3.42673	1.15609	2.96406	0.00303614	0.185852	IFNGR1
rna-XM_042235488.1	35.758	8.67256	2.92753	2.96241	0.00305237	0.186589	EVL
rna-XM_004006311.5	456.224	-0.625181	0.211505	-2.95586	0.00311798	0.190338	ZNF740
rna-XM_004008609.5	46.1704	7.49417	2.53833	2.9524	0.00315318	0.192223	PIP5K1C
rna-XM_004008729.5	202.761	-1.0783	0.365335	-2.95152	0.00316211	0.192302	ZNF354A
rna-XM_012101305.3	114.065	-1.34198	0.454688	-2.95142	0.00316312	0.192302	PAK1IP1
rna-XM_027963655.2	37.8953	-8.66675	2.93716	-2.95073	0.00317028	0.192474	BCOR
gene-LOC105605720	12.129	-1.25094	0.424418	-2.94743	0.00320432	0.192777	LOC105605720
rna-XM_004002501.5	18.0689	1.12179	0.380495	2.94823	0.00319598	0.192777	RIIAD1
rna-XM_004013007.5	337.284	1.18746	0.402695	2.94878	0.00319032	0.192777	CDC27
rna-XM_027960462.2	124.77	-0.374792	0.127141	-2.94784	0.00320004	0.192777	HSPA12A
rna-XM_027973668.2	243.588	0.812801	0.275778	2.9473	0.00320559	0.192777	ZDHHC20
rna-XM_042244596.1	76.3005	-2.90403	0.984849	-2.94871	0.00319105	0.192777	C1QA
rna-XM_042244741.1	14.5177	6.78342	2.30111	2.9479	0.00319945	0.192777	SLC66A1
rna-XM_042237517.1	379.96	-1.31933	0.447768	-2.94647	0.00321422	0.193036	PGC
rna-XM_027976004.2	36.5209	8.70292	2.95518	2.94498	0.00322979	0.193709	CAMSAP2
rna-XM_027972150.2	52.8986	-6.19544	2.10415	-2.94439	0.00323592	0.193815	GFI1
rna-XM_042234808.1	145.403	4.1272	1.4023	2.94317	0.00324869	0.194319	MECOM
rna-XM_042252385.1	93.8129	-1.469	0.499203	-2.94268	0.00325383	0.194365	RNF111
rna-XM_004011723.5	26.7814	4.26176	1.44868	2.94182	0.00326286	0.194643	CSPP1
rna-XM_015096970.3	31.4002	0.792335	0.269403	2.94108	0.00327069	0.194849	L2HGDH
rna-XM_042240198.1	40.7368	-8.77126	2.98373	-2.9397	0.00328533	0.19546	GIGYF1
rna-XM_042229926.1	81.3245	-0.896095	0.304874	-2.93923	0.00329032	0.195495	ZNF831
rna-XM_027969042.2	275.044	-1.28487	0.437697	-2.93553	0.00332982	0.197578	KMT2C
rna-NM_001166192.1	96.5829	-0.539574	0.184101	-2.93086	0.00338027	0.200305	CYGB
rna-XM_027974010.2	33.293	-8.48003	2.89474	-2.92946	0.00339553	0.200941	KCNJ2
rna-XM_042254649.1	46.2339	3.04992	1.0413	2.92895	0.00340107	0.201002	AKAP11
rna-XM_042253686.1	836.775	-0.507008	0.17313	-2.92848	0.00340627	0.201042	EZR
rna-XM_042253379.1	80.2575	-7.02751	2.40184	-2.92589	0.00343474	0.202454	BCL9
rna-XM_042254162.1	37.6032	-8.65583	2.95911	-2.92515	0.00344289	0.202666	FBXO32
rna-XM_042242418.1	43.0431	-8.85063	3.02695	-2.92394	0.00345632	0.202969	BRWD3
rna-XM_042251789.1	35.991	-8.59229	2.93868	-2.92386	0.00345717	0.202969	TMEM175
rna-XM_027960267.2	97.6121	0.967299	0.331085	2.9216	0.00348236	0.204179	CYP2C18
rna-XM_027962529.2	2.02268	-4.44529	1.52203	-2.92063	0.00349323	0.204547	LRRC3B
rna-XM_027966466.2	105.68	2.40404	0.823261	2.92015	0.00349864	0.204594	ZBTB26
rna-XM_042243742.1	13.4149	5.38788	1.84684	2.91735	0.0035302	0.206072	UBR3
rna-XR_006056688.1	52.1607	-1.21488	0.416518	-2.91676	0.00353686	0.206072	TESC
rna-XR_006059922.1	31.3122	-8.39163	2.87712	-2.91668	0.0035378	0.206072	PHYKPL
rna-XM_042240272.1	52.657	-1.13574	0.389602	-2.91514	0.00355531	0.206821	TMEM225B
rna-XM_042232724.1	3.34101	-2.92522	1.00365	-2.91458	0.00356164	0.206919	PLEKHA7
rna-XM_015101567.3	32.6969	-8.454	2.90317	-2.91199	0.00359132	0.208371	STX2
rna-XM_027966922.2	42.1609	-8.81232	3.02697	-2.91127	0.00359965	0.208583	KIF1A
rna-XR_006058965.1	2.68013	-4.84428	1.66823	-2.90383	0.00368624	0.213323	LOC121818831
rna-XM_042252918.1	33.5671	-8.49175	2.9266	-2.90157	0.00371295	0.214589	TM9SF1
rna-XM_027978158.2	185.324	0.253251	0.087317	2.90036	0.0037273	0.215139	MARVELD3
rna-XM_027971149.2	148.718	-0.733174	0.253003	-2.89788	0.0037569	0.215935	ABRAXAS1
rna-XM_042243079.1	64.3202	-2.94303	1.01566	-2.89766	0.00375957	0.215935	IL11RA
rna-XM_042247287.1	26.0275	8.21451	2.83494	2.89759	0.00376041	0.215935	RESF1
rna-XM_042249656.1	26.7391	8.25339	2.84837	2.89758	0.0037605	0.215935	B3GNT3
rna-XM_027971882.2	33.1002	-8.47181	2.92465	-2.89669	0.00377118	0.216269	FBXO34
rna-XM_042234085.1	29.7069	8.40492	2.90256	2.89569	0.00378325	0.216683	PISD
rna-XM_042246908.1	32.0625	-8.42564	2.91044	-2.89497	0.00379194	0.216901	KIF21A
rna-NM_001009295.1	86.0774	0.8892	0.30747	2.89199	0.00382808	0.218687	SELP
rna-XM_012122742.4	24.9568	2.84982	0.986188	2.88973	0.00385569	0.219982	NMRK1
rna-XM_012188382.3	28.0062	8.31991	2.88031	2.88855	0.00387023	0.220236	MCM10
rna-XM_015103190.3	30.2643	-8.34241	2.88795	-2.8887	0.0038684	0.220236	CCDC85B
rna-XM_027970397.2	31.797	-8.41386	2.91322	-2.88816	0.003875	0.220236	CSF1R
rna-XM_004002264.4	10.0312	-6.15764	2.13341	-2.88628	0.00389821	0.220624	CLCC1
rna-XM_012102245.4	26.2502	8.22664	2.85053	2.88601	0.00390165	0.220624	PABPC4
rna-XM_027976742.2	31.5853	8.49361	2.94253	2.8865	0.00389558	0.220624	DZANK1
rna-XM_042256209.1	90.9653	-2.27144	0.786951	-2.88638	0.00389695	0.220624	LOC101108669
rna-NM_001009799.2	84.878	2.59853	0.900935	2.88425	0.00392341	0.220935	SERPINA1
rna-NM_001282137.1	7.21418	1.77217	0.614574	2.88357	0.00393196	0.220935	LRRC51
rna-XM_042242973.1	33.2332	-8.47728	2.93956	-2.88386	0.00392827	0.220935	SECISBP2
rna-XM_042251739.1	21.2396	-3.97716	1.37849	-2.88516	0.00391214	0.220935	FGFR3
rna-XM_042253387.1	30.6377	-8.35998	2.8982	-2.88455	0.00391978	0.220935	MMS22L
rna-XM_004016406.4	66.7436	-0.950971	0.329842	-2.88311	0.00393771	0.220978	PAMR1
rna-XM_015097925.3	33.3458	-8.4823	2.94298	-2.88222	0.00394888	0.221326	PDP1
rna-XM_027969479.2	2312.01	-0.623465	0.216372	-2.88145	0.00395853	0.221588	TPM4
rna-XM_042242481.1	28.4659	-8.2542	2.86599	-2.88006	0.00397605	0.222289	GSN
rna-XM_012101646.4	119.136	0.772986	0.268495	2.87896	0.00398991	0.222768	TMEM126A
rna-XM_012190178.4	16.4626	1.10836	0.385079	2.87827	0.00399867	0.222768	FFAR2
rna-XM_027957090.2	11.4542	1.72228	0.59844	2.87795	0.00400266	0.222768	ALPK3
rna-XM_027973574.2	442.653	0.298064	0.103574	2.8778	0.00400464	0.222768	WDFY2
rna-XM_042255229.1	53.7641	-1.44586	0.502661	-2.87641	0.00402225	0.22319	LOC114112500
rna-XR_006056917.1	88.8191	4.79101	1.66548	2.87665	0.00401917	0.22319	EVL
rna-XM_042230141.1	24.6968	8.13876	2.83192	2.87394	0.0040539	0.224666	LPIN3
rna-XM_042247286.1	24.1438	8.10613	2.82143	2.87306	0.00406513	0.225008	RESF1
rna-XM_012174439.3	17.3339	1.97328	0.687801	2.86896	0.00411821	0.227663	SCAF11
rna-XM_042243935.1	33.0215	-8.46815	2.9547	-2.86599	0.00415702	0.229523	R3HDM1
rna-XR_006059232.1	188.321	-2.23507	0.780162	-2.86488	0.0041717	0.230048	BIRC6
rna-XM_027978377.2	11.2467	-4.13604	1.44393	-2.86444	0.00417753	0.230085	LOC101103343
rna-NM_001142892.1	18.1752	1.6963	0.592614	2.8624	0.00420443	0.230426	NFIL3
rna-XM_012164296.4	61.9289	-1.15496	0.403479	-2.86251	0.00420299	0.230426	ITGB1BP1
rna-XM_042234879.1	5.24226	-4.58573	1.60167	-2.8631	0.00419515	0.230426	DERL3
rna-XM_042249849.1	1.41479	-3.25394	1.13664	-2.86276	0.00419968	0.230426	NFIX
rna-XM_015098433.3	35.384	8.6574	3.02718	2.85989	0.00423783	0.231401	STXBP4
rna-XM_027957744.2	154.797	0.304073	0.106321	2.85995	0.00423714	0.231401	LOC101119765
rna-XM_027969446.2	68.0476	8.65631	3.0267	2.85998	0.00423666	0.231401	SLC27A1
rna-XM_042253431.1	26.6566	-6.01922	2.10624	-2.8578	0.0042659	0.232648	NT5E
rna-XM_042256545.1	32.0297	7.93127	2.77621	2.85687	0.00427841	0.233045	HELZ
rna-XM_042242641.1	1.75281	4.31666	1.51185	2.85522	0.00430071	0.233853	SH3GL3
rna-XM_042246630.1	42.4843	4.63793	1.6245	2.855	0.00430375	0.233853	ITGA5
rna-XM_042249760.1	64.3845	-5.48001	1.92099	-2.8527	0.00433498	0.235263	WIZ
rna-XM_004012199.5	58.4894	-1.23453	0.43283	-2.85222	0.00434149	0.235329	SLITRK6
rna-XM_004019206.5	47.8683	-0.648951	0.22775	-2.8494	0.00438022	0.237048	KCNK16
rna-XM_027956741.2	3.99966	5.51316	1.93503	2.84913	0.00438386	0.237048	ZMAT5
rna-XM_004013715.5	3.25276	5.21393	1.83244	2.84534	0.0044364	0.239598	CLCN6
rna-XM_027956892.2	54.3277	-1.81316	0.637665	-2.84345	0.00446286	0.240443	SLC7A4
rna-XM_027975136.2	163.103	-0.640086	0.225089	-2.8437	0.00445926	0.240443	HIC1
rna-XM_027970717.2	89.9685	-8.60064	3.02575	-2.84248	0.00447642	0.240882	CLOCK
rna-XM_012177637.3	456.809	-0.448228	0.157778	-2.84088	0.00449898	0.240955	CLCC1
rna-XM_015102889.3	450.479	-1.4897	0.52436	-2.84099	0.00449741	0.240955	CAPN1
rna-XM_027969712.2	74.354	-3.05206	1.07434	-2.84088	0.00449897	0.240955	PNPLA6
rna-XM_042241522.1	27.3737	-1.89246	0.66616	-2.84084	0.00449943	0.240955	TM2D2
rna-XM_012104137.4	58.6167	-1.04714	0.368677	-2.84027	0.00450748	0.241096	LOC101109935
rna-XM_027977877.2	2.04235	4.54007	1.59956	2.83832	0.00453513	0.242284	DRC7
rna-XM_027956338.2	101.325	-0.599973	0.211447	-2.83746	0.00454734	0.242354	PDGFC
rna-XM_042235720.1	4.4882	5.6802	2.00173	2.83765	0.00454467	0.242354	RASSF1
rna-NM_001009412.1	31.8015	1.99469	0.70337	2.83591	0.00456956	0.242956	TPSB2
rna-XM_042246172.1	6.89117	-3.07249	1.08335	-2.83611	0.00456669	0.242956	ERLEC1
rna-XM_027962378.2	28.6155	-8.26163	2.91531	-2.83388	0.00459863	0.24421	NDST2
rna-XM_042252670.1	2.79758	-4.90205	1.73029	-2.83308	0.00461023	0.244534	RAD51B
rna-XM_012102831.4	589.472	-1.00986	0.356626	-2.83171	0.00462993	0.245005	LDB1
rna-XM_042237014.1	66.5224	-1.71311	0.604976	-2.8317	0.00463011	0.245005	BRD2
rna-NM_001190392.1	96.0828	2.26835	0.801969	2.82847	0.00467709	0.246904	DUOX2
rna-XM_042253803.1	8.96096	3.08116	1.08923	2.82875	0.00467298	0.246904	AZIN1
rna-XM_027967705.2	4.20599	4.3714	1.54739	2.825	0.004728	0.249296	RBFOX2
rna-XM_042245712.1	26.1607	-8.13224	2.88169	-2.82204	0.00477192	0.251017	NR6A1
rna-XR_006056946.1	11.8207	6.48584	2.2981	2.82226	0.00476864	0.251017	MTA1
rna-XM_042243333.1	23.0611	3.53678	1.25351	2.8215	0.00477996	0.251143	GCNT1
rna-XR_006056321.1	243.598	1.0745	0.381005	2.82019	0.00479959	0.251877	LOC114118386
rna-XM_042243381.1	26.2342	-8.13642	2.88719	-2.81811	0.00483067	0.253209	CBWD1
rna-XM_027974218.2	107.401	0.923264	0.327794	2.8166	0.0048535	0.254107	ENGASE
rna-XM_027966369.2	27.8746	8.31321	2.9522	2.81594	0.00486353	0.254332	CERCAM
rna-XM_004006099.5	689.021	0.219412	0.0779622	2.81434	0.00488773	0.255298	MRPL53
rna-XM_004009639.5	1386.27	0.501391	0.178364	2.81106	0.00493786	0.257471	PAPSS1
rna-XM_012188424.4	21.5503	7.942	2.82585	2.81048	0.00494669	0.257471	RPP38
rna-XM_027978727.2	32.4776	4.88853	1.73934	2.81057	0.00494542	0.257471	JAM2
rna-XM_042251542.1	10.8746	1.00265	0.356926	2.80912	0.0049677	0.258262	S1PR1
rna-XM_027961688.2	25.6957	2.52291	0.898442	2.80809	0.0049836	0.258787	KNOP1
rna-XM_027956341.2	33.7447	-8.49933	3.02716	-2.80769	0.00498985	0.258809	GUCY1A1
rna-XM_004006112.5	23.2863	-7.96432	2.8387	-2.80562	0.00502194	0.259868	SEMA4F
rna-XM_012180493.4	515.107	-0.671679	0.239375	-2.80597	0.00501653	0.259868	PRPF3
rna-XM_042234663.1	8.29259	2.57186	0.918361	2.80049	0.00510256	0.263155	RITA1
rna-XM_042240413.1	734.853	0.847693	0.302661	2.8008	0.0050976	0.263155	HIP1
rna-XM_042242859.1	2.2623	-4.60092	1.64293	-2.80045	0.00510321	0.263155	RGS3
rna-XM_015094815.3	22.2218	-7.89697	2.82083	-2.79952	0.00511781	0.263298	NEDD1
rna-XM_042255202.1	40.0637	1.45819	0.520819	2.7998	0.00511343	0.263298	STRADA
rna-XM_042238852.1	82.1108	-0.993391	0.354935	-2.7988	0.00512937	0.263588	MFSD13A
rna-NM_001166186.1	53.7358	-0.869897	0.310897	-2.79802	0.00514165	0.263626	TIMP2
rna-XM_004023220.5	373.568	0.629661	0.225039	2.798	0.00514196	0.263626	MYORG
rna-XM_027968345.2	15.4199	-2.33004	0.833012	-2.79713	0.00515592	0.264038	ARL4A
rna-XM_027970450.2	21.8206	6.79155	2.42854	2.79655	0.00516509	0.264203	MED7
rna-XM_004012385.5	4.74954	-4.45307	1.59326	-2.79494	0.00519091	0.264915	C11H17orf67
rna-XM_042229783.1	1.30419	3.20259	1.14578	2.79512	0.00518812	0.264915	DNAAF9
rna-XM_042252963.1	20.5137	7.87078	2.81676	2.79426	0.00520181	0.265167	LOC121815983
rna-XM_027956552.2	23.3938	-7.97078	2.85436	-2.7925	0.00523028	0.266009	TBX3
rna-XR_006058196.1	46.8109	-1.8518	0.663057	-2.79281	0.00522516	0.266009	LOC121816030
rna-XM_015101352.3	348.208	0.565798	0.202644	2.79207	0.00523719	0.266057	PDCD6
rna-XM_012116105.3	326.175	-0.453028	0.162293	-2.79141	0.00524785	0.266294	C1H1orf210
rna-XM_004009821.4	1117.19	0.1884	0.0675105	2.79068	0.00525978	0.266595	OCIAD1
gene-LOC114115551	1.44332	-3.2653	1.17039	-2.78991	0.0052722	0.266733	LOC114115551
rna-XM_042234497.1	4.73993	5.14402	1.84396	2.78966	0.00527628	0.266733	RIMBP2
rna-XM_042248907.1	16.2434	3.84691	1.37912	2.78941	0.00528048	0.266733	LOC101105324
rna-XM_027958191.2	22.4759	-7.91318	2.83741	-2.78887	0.00528922	0.266737	MAGI1
rna-XM_042243956.1	57.7454	-5.17216	1.85471	-2.78867	0.00529254	0.266737	INSIG2
rna-XM_042232172.1	3.96602	2.02655	0.727068	2.78729	0.00531513	0.267572	MIX23
rna-XM_042235334.1	53.7094	5.43024	1.94855	2.78681	0.00532289	0.26766	MIS18BP1
rna-XM_004019137.4	197.497	0.687667	0.246805	2.78628	0.00533175	0.267691	PAK1IP1
rna-XM_042230948.1	20.6664	7.88181	2.82903	2.78605	0.00533552	0.267691	ARHGEF1
rna-XM_042252384.1	21.1639	-4.5754	1.64304	-2.78471	0.00535754	0.268492	RAP1A
rna-XM_042256492.1	22.2096	7.98513	2.86824	2.78399	0.00536955	0.268792	FAM20A
rna-XM_004020718.5	235.417	0.918803	0.330079	2.78359	0.00537614	0.268819	RNPS1
rna-XR_006058132.1	3.57701	2.16671	0.778582	2.78289	0.00538774	0.269097	LOC121818027
rna-XM_042254633.1	21.7734	-7.86747	2.82816	-2.78184	0.00540519	0.269666	WBP4
rna-XM_027975488.2	12.491	1.1808	0.424661	2.78057	0.00542628	0.269966	LOC101111303
rna-XM_042236394.1	65.9661	8.41545	3.02672	2.78039	0.00542941	0.269966	TMCC1
rna-XR_006060672.1	223.188	-0.395522	0.142233	-2.78079	0.00542263	0.269966	GTF2H5
rna-XM_012174324.4	18.6806	7.736	2.78342	2.77931	0.00544739	0.270558	DNAJB4
rna-XM_042253326.1	7.25595	5.18525	1.86711	2.77715	0.00548376	0.27206	FIG4
rna-XM_004009602.5	23.8744	8.08998	2.91403	2.77621	0.00549961	0.272543	CAMK2D
rna-XM_012105223.3	18.7915	-4.00899	1.44462	-2.77512	0.00551817	0.272876	LRRC20
rna-XM_027963371.2	2129.82	0.499975	0.18018	2.77487	0.00552245	0.272876	AMOT
rna-XM_042245162.1	2.2141	-4.56221	1.6442	-2.77473	0.00552473	0.272876	CBX5
rna-XM_027956545.2	432.585	0.677919	0.244439	2.77337	0.00554799	0.273721	TESC
rna-XM_042244788.1	22.8767	-7.93848	2.86329	-2.7725	0.00556277	0.274147	ARHGEF19
rna-XR_006057464.1	3.05643	-4.42321	1.59561	-2.77211	0.00556942	0.274171	LOC121817515
rna-XM_004018898.5	185.125	1.57334	0.567736	2.77125	0.00558414	0.274288	LOC101106720
rna-XM_027966096.2	206.512	3.2223	1.16274	2.77131	0.00558317	0.274288	FBXW5
rna-XM_042244532.1	13.304	3.87561	1.39871	2.77084	0.00559119	0.274332	PAQR7
rna-XM_042241738.1	21.19	-3.4561	1.24824	-2.76877	0.00562678	0.275774	GPR174
rna-XM_042243426.1	20.4254	-1.55458	0.561637	-2.76794	0.00564111	0.276172	CD274
rna-XM_004008093.4	157.564	-1.26662	0.457928	-2.76598	0.00567517	0.277068	PTN
rna-XM_004015382.5	85.2893	-2.32916	0.842292	-2.76526	0.00568776	0.277068	AKT1S1
rna-XM_027966938.2	19.4828	1.32676	0.479886	2.76474	0.00569676	0.277068	RASGRP3
rna-XM_027973299.2	1621.04	-1.73037	0.62559	-2.76598	0.00567515	0.277068	PLEC
rna-XM_027979932.2	14.0019	2.62923	0.950884	2.76504	0.00569165	0.277068	CD200
rna-XM_042253626.1	46.1923	-4.23383	1.53084	-2.7657	0.00568013	0.277068	ZBTB2
rna-XM_042244689.1	20.9341	7.90018	2.85816	2.76408	0.00570827	0.277325	TMCO4
rna-XR_006057386.1	14.1555	-1.00447	0.363612	-2.76247	0.00573654	0.278394	LOC121817472
rna-XM_012107683.4	21.3114	-7.83642	2.83781	-2.76144	0.00575478	0.278975	CSTF2
rna-XM_004017315.5	1735.87	-0.430323	0.155863	-2.76091	0.00576406	0.279121	LOC101115905
rna-XM_004003078.5	126.471	5.24334	1.90062	2.75876	0.00580215	0.279643	MAP3K13
rna-XM_012185311.4	921.354	0.365844	0.13262	2.75859	0.00580519	0.279643	AP2B1
rna-XM_042236665.1	15.6597	5.31517	1.9263	2.75926	0.00579323	0.279643	ATG7
rna-XM_042253356.1	20.9037	-7.80867	2.82957	-2.75967	0.00578599	0.279643	CHD1L
rna-XR_006056606.1	23.2418	0.753638	0.273203	2.75853	0.00580625	0.279643	LOC121816892
rna-XM_015096098.3	19.9947	0.979392	0.355186	2.75741	0.00582619	0.2803	LOC101105495
id-LOC114118882	3772.95	0.856467	0.310763	2.75602	0.005851	0.280886	LOC114118882
rna-XR_006058783.1	1.63912	4.22165	1.53173	2.75613	0.005849	0.280886	LOC121818717
rna-XM_027967548.2	7.50919	-6.3337	2.29847	-2.75562	0.00585817	0.280927	R3HDM2
rna-XM_042245735.1	28.8684	3.91011	1.41955	2.75447	0.00587867	0.281607	ZBTB6
rna-XM_027956748.2	22.1121	-7.88946	2.86613	-2.75265	0.00591153	0.282876	MTMR3
rna-XM_042246056.1	20.0311	7.83659	2.84783	2.75178	0.00592728	0.283325	LOC101104728
rna-XM_027970938.2	18.7365	7.73998	2.81385	2.75067	0.00594728	0.283368	UBE2K
rna-XM_042229651.1	23.4846	-7.97635	2.89908	-2.75134	0.00593522	0.283368	LOC101104594
rna-XR_006056887.1	424.037	-0.716988	0.260635	-2.75093	0.00594266	0.283368	LOC121817120
rna-XM_027977055.2	1192.77	-0.749931	0.272991	-2.74709	0.00601258	0.285867	LOC106991529
rna-XM_042241118.1	21.1945	1.18145	0.430026	2.74738	0.0060073	0.285867	TMEM72
rna-XM_042239655.1	3.76349	-1.88484	0.686327	-2.74627	0.00602767	0.286279	LPIN2
rna-XM_015102891.3	667.894	-0.578537	0.210808	-2.74437	0.00606264	0.287633	IGF2
rna-XM_042255493.1	1.28132	-3.76499	1.37208	-2.74401	0.00606935	0.287644	SERPINF2
rna-XM_042230234.1	1.90518	4.43404	1.61675	2.74257	0.00609612	0.288422	ZMYND8
rna-XM_042245713.1	18.9235	-7.66516	2.79503	-2.74243	0.00609872	0.288422	NR6A1
rna-XM_042244829.1	17.1115	7.60944	2.77622	2.74093	0.00612648	0.289428	KIF27
rna-XM_042252629.1	39.3998	-5.55766	2.02934	-2.73866	0.00616904	0.291129	FUT8
rna-XM_042243614.1	40.0823	4.92736	1.79992	2.73754	0.00618997	0.291807	NEMP2
rna-XM_042253063.1	62.9514	4.97223	1.81694	2.7366	0.00620779	0.292338	PCNX4
rna-XM_015096596.3	259.302	-0.233933	0.0855962	-2.73299	0.00627625	0.294626	THAP9
rna-XM_027963151.2	23.4205	0.946738	0.346346	2.73351	0.00626639	0.294626	TRPC5
rna-XM_027965746.2	30.774	2.61664	0.957415	2.73302	0.00627558	0.294626	TIMELESS
rna-XM_042249173.1	21.0413	7.90734	2.89368	2.73262	0.0062832	0.294642	NAPEPLD
rna-XM_015098764.3	292.734	-0.840401	0.307689	-2.73133	0.00630793	0.294923	MSL1
rna-XM_027965277.2	315.615	-1.32739	0.486012	-2.73119	0.00631059	0.294923	TRIP12
rna-XM_042245977.1	49.9845	-7.34691	2.68961	-2.73159	0.00630286	0.294923	MACF1
rna-XR_001038941.3	43.9174	0.888407	0.325314	2.73092	0.0063157	0.294923	LOC105612334
rna-XM_027970036.2	45.9762	-1.84605	0.676183	-2.73011	0.00633134	0.295343	OSBPL9
rna-XM_042249208.1	5.69544	-2.3777	0.871227	-2.72914	0.00635006	0.295906	NT5C3A
rna-XM_042232557.1	22.1281	7.98046	2.92639	2.72706	0.00639011	0.297461	TSEN34
rna-XM_042253640.1	12.7558	-3.92236	1.43888	-2.72598	0.00641105	0.298124	SYNE1
rna-XM_012185920.4	11.9477	4.77853	1.7539	2.72452	0.00643942	0.298345	PDK2
rna-XM_027974011.2	942.482	0.265109	0.0972837	2.72511	0.00642796	0.298345	SOX9
rna-XM_042247840.1	17.9424	-0.854077	0.313496	-2.72436	0.00644262	0.298345	FAF1
rna-XM_042253399.1	18.0641	-7.59819	2.78835	-2.72498	0.00643052	0.298345	BACH2
rna-XM_027977093.2	44.5065	2.10961	0.775081	2.72179	0.00649301	0.300366	ZNF341
id-LOC121816881	1358.84	0.802291	0.294969	2.71991	0.00652991	0.301441	LOC121816881
rna-XM_042236500.1	16.7869	7.58149	2.78757	2.71975	0.00653307	0.301441	XYLB
rna-XM_042251248.1	20.9252	5.41286	1.99033	2.71958	0.00653658	0.301441	FAM13A
rna-XM_042236214.1	25.7355	2.29616	0.844496	2.71897	0.00654852	0.301679	APEH
gene-LOC121816399	645.132	0.178255	0.0655942	2.71753	0.00657702	0.302268	LOC121816399
rna-XM_027961197.2	1053.76	0.922775	0.339519	2.71789	0.00656989	0.302268	PIGQ
rna-XM_027971859.2	66.5108	1.47821	0.543998	2.7173	0.00658167	0.302268	DUOX1
rna-XM_027968341.2	6.67428	5.04465	1.85722	2.71624	0.00660279	0.302613	ST7
rna-XM_042247842.1	1.43913	4.03185	1.48428	2.71637	0.00660021	0.302613	PACSIN2
rna-XM_042254141.1	30.6763	-7.19841	2.65126	-2.71509	0.0066257	0.303351	WASHC5
rna-XR_003590697.2	266.801	0.840348	0.309622	2.71411	0.00664544	0.303942	CGN
rna-XM_027968238.2	19.0593	7.765	2.86233	2.71283	0.00667121	0.304183	ALG12
rna-XM_042239318.1	77.0871	-3.16238	1.16561	-2.71307	0.00666625	0.304183	CEP192
rna-XM_042249369.1	79.702	4.03526	1.48735	2.71306	0.00666656	0.304183	SLC26A2
rna-XM_012124980.4	21.119	7.91253	2.92002	2.70975	0.0067334	0.306574	IL33
rna-XM_015098188.3	105.899	5.20675	1.92163	2.70955	0.00673744	0.306574	XPO4
rna-XM_027956398.2	20.7089	-1.72307	0.636309	-2.70792	0.00677065	0.307282	FZD10
rna-XM_042250796.1	65.6224	-5.71295	2.10984	-2.70777	0.00677371	0.307282	PAM
rna-XM_042255401.1	21.3056	7.92546	2.92651	2.70816	0.00676572	0.307282	TAF15
rna-XM_042249260.1	19.6233	-7.71727	2.85332	-2.70467	0.00683732	0.309852	KCNH2
rna-XM_027964108.2	20.2869	-7.7651	2.87225	-2.70349	0.00686146	0.310629	FKBP15
rna-XM_042255290.1	25.1825	-8.07703	2.98873	-2.7025	0.00688205	0.311245	RNF43
rna-XM_042229210.1	25.4277	8.18071	3.02756	2.70208	0.0068908	0.311324	PROX1
rna-XM_027961637.2	270.467	0.274567	0.101661	2.70082	0.00691686	0.312015	FBXL18
rna-XM_027975078.2	15.865	7.50034	2.7774	2.70049	0.00692376	0.312015	INCA1
rna-XM_042232735.1	82.1271	7.74018	2.86639	2.70033	0.00692713	0.312015	TFRC
rna-XM_004008689.5	268.874	7.8679	2.91544	2.6987	0.00696114	0.312189	DMXL1
rna-XM_012123793.4	58.7832	-8.16952	3.02675	-2.6991	0.00695263	0.312189	KANK1
rna-XM_027967960.2	32.9126	-5.3016	1.96467	-2.69846	0.00696606	0.312189	IFFO1
rna-XM_042254195.1	17.6491	-7.56445	2.80264	-2.69905	0.00695384	0.312189	PCMTD1
rna-XR_006058873.1	23.8796	-0.700609	0.259533	-2.6995	0.00694436	0.312189	LOC121818767
rna-XM_027961878.2	32.6974	2.68753	0.996598	2.69671	0.00700289	0.313524	DNASE1
rna-XM_042233418.1	21.7028	5.75699	2.136	2.69522	0.00703432	0.31453	PHF21A
rna-XM_042242553.1	19.7916	-7.14594	2.65158	-2.69497	0.00703951	0.31453	HAUS7
rna-XM_004013198.5	1.61054	-4.10986	1.52557	-2.69398	0.00706037	0.315034	C11H17orf50
rna-XM_042252634.1	24.7851	-8.05425	2.98996	-2.69377	0.00706494	0.315034	GPHN
rna-XM_042230137.1	98.9083	8.00959	2.97454	2.69272	0.00708725	0.315713	ZHX3
rna-XM_027958193.2	17.4886	-7.55121	2.80504	-2.69202	0.00710212	0.316041	MAGI1
rna-XM_042242833.1	105.049	-8.00635	2.97446	-2.6917	0.00710883	0.316041	COL27A1
rna-XM_012172799.4	17.619	-1.2294	0.456816	-2.69124	0.00711871	0.316164	HAAO
rna-XM_027961168.2	26.6018	-8.14589	3.02743	-2.6907	0.00713033	0.316365	LOC101109584
rna-XM_042250399.1	78.6669	3.97987	1.47989	2.6893	0.00716017	0.317372	LOC101112480
rna-XM_027971885.2	84.2302	-1.20457	0.448013	-2.6887	0.00717318	0.317608	KTN1
rna-XM_042257242.1	3.1723	3.93134	1.46234	2.68839	0.00717976	0.317608	CLCN6
rna-XM_027973424.2	21.9766	-3.10741	1.15636	-2.68723	0.00720466	0.318032	GLI4
rna-XM_042257182.1	55.166	-6.14721	2.2877	-2.68707	0.0072081	0.318032	CEP170
rna-XR_006055663.1	24.6364	-1.96426	0.731037	-2.68695	0.00721078	0.318032	LOC105606212
rna-XM_027958189.2	17.2966	-7.53528	2.80558	-2.68582	0.00723519	0.318792	MAGI1
rna-XM_004014584.5	528.719	0.422504	0.157386	2.68451	0.00726356	0.319095	FITM2
rna-XM_042250940.1	9.73896	2.09147	0.778982	2.68488	0.00725558	0.319095	SPATA24
rna-XR_006059741.1	30.6982	-2.62921	0.979388	-2.68454	0.00726299	0.319095	INSIG1
rna-XM_012186898.4	18.5731	1.95359	0.727961	2.68364	0.00728249	0.319611	CHI3L1
rna-XM_042246853.1	1.54339	-4.0596	1.51354	-2.6822	0.00731407	0.320681	PPHLN1
rna-XM_042241782.1	3.52925	-3.37577	1.25879	-2.68176	0.00732368	0.320786	LOC114111321
rna-XM_042237836.1	70.1172	2.65181	0.989295	2.6805	0.00735113	0.321671	TCIRG1
rna-XM_042232220.1	133.897	4.78963	1.78757	2.67941	0.0073753	0.322096	ARHGAP35
rna-XR_003585726.2	19.3969	-7.7004	2.8736	-2.67971	0.00736866	0.322096	TMEM44
rna-XM_012187149.4	124.289	4.88237	1.82266	2.6787	0.0073908	0.322456	CDC42BPA
rna-XM_042255990.1	87.3399	1.76198	0.658373	2.67627	0.00744467	0.324488	WNK4
rna-XM_012190227.4	17.4134	-7.54527	2.82006	-2.67558	0.00746009	0.32479	ZNF146
rna-XM_027974972.2	18.2725	7.70424	2.88012	2.67497	0.00747348	0.32479	CELF3
rna-XM_027977350.2	14.892	7.40919	2.7695	2.67528	0.00746667	0.32479	DEDD
rna-NM_001185018.1	79.5677	-2.36115	0.882898	-2.67431	0.00748825	0.325114	CLDN7
rna-XM_042234855.1	33.6466	0.923882	0.345652	2.67287	0.00752061	0.325883	SELENOM
rna-XM_042243685.1	39.8681	-1.29119	0.483058	-2.67295	0.00751875	0.325883	MTX2
rna-XM_027977261.2	16.3962	-7.45844	2.7908	-2.67251	0.00752851	0.325908	PCIF1
rna-XM_042233633.1	11.2405	-1.88012	0.703804	-2.67136	0.00755437	0.326393	LOC114118683
rna-XM_042251940.1	191.286	-0.753098	0.281908	-2.67144	0.00755275	0.326393	BMP4
rna-XM_012112989.4	17.9459	-7.5882	2.84152	-2.67047	0.00757448	0.326627	FKBP15
rna-XM_015093553.3	598.159	0.446366	0.167139	2.67062	0.00757119	0.326627	SGPP2
rna-XM_027970523.2	46.2805	2.39154	0.895692	2.67005	0.00758406	0.326724	MCTP1
rna-XM_012179757.4	16.5232	7.55904	2.83156	2.66956	0.00759501	0.326749	ZCCHC4
rna-XM_042247746.1	17.8299	-7.57897	2.83923	-2.66937	0.00759933	0.326749	SUN2
rna-XM_042250387.1	17.2506	7.62087	2.85641	2.66799	0.00763072	0.327782	ZNF354A
rna-XM_027967997.2	14.813	7.40084	2.77537	2.66661	0.0076621	0.328813	TSPAN11
rna-XM_012183909.3	16.3914	-7.45792	2.7978	-2.66564	0.00768423	0.329128	PAG1
rna-XR_006057311.1	15.5439	7.47058	2.80249	2.66569	0.00768296	0.329128	LOC121817415
rna-XM_042236406.1	7.38011	3.71201	1.39318	2.66442	0.00771204	0.330001	MBD4
rna-XM_015097585.3	18.9727	3.52595	1.32441	2.66228	0.00776128	0.330836	COMMD5
rna-XM_027960156.2	127.158	2.31991	0.871384	2.66233	0.00776022	0.330836	ACSL5
rna-XM_042238545.1	41.3992	3.81843	1.43416	2.66248	0.00775675	0.330836	SGMS1
rna-XR_006056182.1	4.37319	2.23738	0.840395	2.6623	0.00776087	0.330836	LOC121816517
rna-XM_012100690.3	21.4857	-7.84817	2.94851	-2.66174	0.0077737	0.331048	KLC4
rna-XM_042232668.1	21.3719	-7.84054	2.94733	-2.66022	0.00780895	0.332231	CEP164
rna-XM_042251931.1	27.3117	2.84276	1.06889	2.65953	0.00782494	0.332593	DUOX2
rna-XM_004022654.4	1354.32	0.297849	0.112043	2.65833	0.00785278	0.333459	DNASE1L1
rna-XR_006057640.1	24.6619	-8.04686	3.02752	-2.6579	0.00786288	0.333569	LOC105604300
rna-XM_042248560.1	15.2557	-7.35454	2.76799	-2.657	0.00788403	0.334148	PNPLA8
rna-XM_027960391.2	18.0875	7.68883	2.89492	2.65598	0.00790795	0.334842	ABLIM1
rna-XM_004017195.5	48.1469	-6.37073	2.40011	-2.65435	0.00794624	0.335934	FBXW7
rna-XM_042254016.1	16.1537	2.65987	1.00212	2.65424	0.00794883	0.335934	DENND3
rna-XM_012105226.4	33.8395	2.81043	1.05916	2.65346	0.00796706	0.336385	SGPL1
rna-XM_027964498.2	1.86234	-4.31505	1.62671	-2.65262	0.00798697	0.336587	TMC1
rna-XM_027973484.2	51.4716	-0.55896	0.210702	-2.65285	0.00798156	0.336587	ZNF696
rna-XM_004019478.5	372.869	0.537527	0.20276	2.65105	0.00802426	0.336753	LOC101121216
rna-XM_027961371.2	72.9775	0.735663	0.27743	2.65171	0.00800857	0.336753	GNG13
rna-XM_027971996.2	217.904	1.09092	0.411357	2.652	0.00800177	0.336753	NUMB
rna-XM_027975701.2	24.2932	-8.02559	3.02754	-2.65086	0.00802874	0.336753	PLEKHG5
rna-XM_042241167.1	109.105	0.745343	0.281133	2.65121	0.00802034	0.336753	DNAJB12
rna-XM_004020859.5	167.392	-1.53225	0.578267	-2.64972	0.00805577	0.337569	LAT
rna-XM_027957304.2	764.458	0.902637	0.340834	2.64832	0.00808937	0.337881	TP53BP1
rna-XM_027961451.2	15.8698	-3.10255	1.17135	-2.64869	0.00808037	0.337881	FBXO25
rna-XM_042237441.1	22.7135	8.01785	3.02773	2.64814	0.00809358	0.337881	LOC101107908
rna-XM_042239513.1	24.2044	-8.0199	3.02755	-2.64898	0.00807363	0.337881	C23H18orf54
rna-XM_042241542.1	22.6669	8.01447	3.02773	2.64702	0.00812045	0.338367	FHL1
rna-XR_006060951.1	1.41876	-3.9275	1.48358	-2.64731	0.00811347	0.338367	LOC121820432
rna-XM_015104810.3	1284.91	-0.213243	0.0805746	-2.64653	0.00813225	0.338542	RBBP7
rna-XM_004016897.5	949.786	-0.594022	0.22457	-2.64515	0.00816549	0.339291	TNPO1
rna-XM_042243161.1	19.2596	7.77933	2.9407	2.6454	0.00815943	0.339291	FHIP2B
rna-XM_027958481.2	72.4567	-0.430715	0.162893	-2.64415	0.00818958	0.339975	ID4
rna-XM_042252972.1	60.1762	-5.53834	2.09517	-2.64338	0.00820831	0.340434	PRMT5
rna-XM_042239413.1	22.4655	8.00226	3.02774	2.64298	0.00821803	0.34052	DTNA
rna-XM_027958781.2	20.9685	-4.08221	1.54516	-2.64194	0.00824329	0.341044	B3GALNT1
rna-XM_042254800.1	17.0223	-7.51257	2.8437	-2.64183	0.00824599	0.341044	BRCA2
rna-XM_042251113.1	21.3395	3.15409	1.19509	2.6392	0.00831015	0.343378	USP53
rna-XM_012184732.3	38.2985	4.23953	1.60694	2.63825	0.00833339	0.344019	CENPJ
rna-XM_015092016.3	1.73312	-2.87753	1.09086	-2.63785	0.00834325	0.344107	FOXD3
rna-XR_006059776.1	1.27835	3.87661	1.46982	2.63747	0.00835277	0.344181	LOC121819500
rna-XM_004016404.5	527.13	0.297287	0.112751	2.63666	0.00837259	0.344481	PDHX
rna-XM_027973268.2	207.417	0.370532	0.140537	2.63654	0.00837555	0.344481	DSCC1
rna-XM_042250660.1	23.5319	-7.97958	3.02759	-2.63562	0.00839825	0.345096	FAM114A2
rna-XM_042247030.1	6.60686	5.63786	2.13972	2.63486	0.0084173	0.34556	R3HDM2
rna-XM_042241730.1	22.0186	7.97259	3.02778	2.63315	0.00845969	0.34698	SLITRK4
gene-LOC101105802	79.7523	-0.376088	0.14285	-2.63275	0.00846958	0.347065	LOC101105802
rna-XM_012098757.3	21.9099	7.96587	3.02778	2.63092	0.00851532	0.347288	G2E3
rna-XM_027978416.2	8.41478	-1.30436	0.495683	-2.63144	0.00850237	0.347288	LOC101111695
rna-XM_042233562.1	19.018	7.76121	2.95013	2.6308	0.00851829	0.347288	TMEM41A
rna-XM_042240930.1	14.67	-7.29813	2.773	-2.63185	0.00849202	0.347288	LGALS8
rna-XM_042256395.1	52.257	3.99007	1.5161	2.63179	0.00849352	0.347288	SLC16A5
rna-XR_003589639.2	1.60722	-4.10734	1.56133	-2.63066	0.00852184	0.347288	LOC114115268
rna-XM_042244304.1	23.2474	-7.96177	3.0276	-2.62973	0.00854536	0.347928	SGPP2
rna-XM_012178962.4	21.796	7.9582	3.02779	2.62838	0.00857918	0.348349	MCTP1
rna-XM_042231504.1	10.0135	2.66387	1.01346	2.62848	0.00857666	0.348349	MBTPS1
rna-XM_042247902.1	21.8154	7.95989	3.02779	2.62894	0.00856503	0.348349	ZBED4
rna-XM_004011267.5	15.8453	-1.46622	0.55796	-2.62782	0.00859351	0.348613	MAP3K7
rna-XM_027972023.2	360.269	-1.03895	0.395635	-2.62603	0.00863865	0.349488	AREL1
rna-XM_042241503.1	104.607	7.76482	2.95686	2.62604	0.00863853	0.349488	CFAP97
rna-XM_042255451.1	97.185	0.945525	0.360046	2.62612	0.00863642	0.349488	LOC105605807
rna-XM_027967596.2	1.84462	4.39361	1.67402	2.62458	0.0086755	0.350342	ANKRD52
rna-XM_042257086.1	23.0112	-7.94713	3.02762	-2.62488	0.00866801	0.350342	EPRS1
rna-XM_042246941.1	22.966	-7.94403	3.02762	-2.62385	0.0086942	0.350779	MDM2
rna-XM_042246229.1	21.5603	7.94273	3.02781	2.62326	0.0087093	0.35107	PREPL
rna-XM_042256486.1	6.37645	-1.7752	0.677128	-2.62166	0.00875038	0.352407	ABCA6
rna-XM_042249942.1	14.054	-7.23584	2.76054	-2.62117	0.00876285	0.35259	KRI1
rna-XM_042248188.1	21.4334	7.934	3.02782	2.62037	0.00878349	0.353101	RAB5B
rna-XM_027975786.2	22.6893	-7.9271	3.02764	-2.61825	0.0088383	0.354466	MIB2
rna-XM_042230541.1	14.2823	-4.01943	1.53517	-2.61823	0.0088388	0.354466	OPTN
rna-XM_042235546.1	7.11513	-3.4495	1.31754	-2.61813	0.00884135	0.354466	LOC101122983
rna-XM_027956506.2	14.6136	-7.29243	2.78578	-2.61774	0.00885155	0.354556	HVCN1
rna-XM_012181837.3	4.82001	-5.0819	1.94271	-2.61588	0.00889979	0.356117	S100A5
rna-XM_015099216.3	38.0563	0.623745	0.238469	2.61562	0.00890653	0.356117	DRAXIN
rna-XM_027966300.2	22.5278	-7.91632	3.02765	-2.61467	0.00893125	0.356577	FNBP1
rna-XM_042246765.1	20.3345	-0.950075	0.363377	-2.61457	0.00893405	0.356577	TUBA1C
rna-XM_042241267.1	22.4943	-7.91436	3.02765	-2.61403	0.00894823	0.356823	PSD3
rna-XM_042233528.1	21.0753	7.90985	3.02785	2.61237	0.00899173	0.357916	CELF1
rna-XM_042242244.1	181.811	2.68091	1.02613	2.61264	0.00898466	0.357916	LOC101116381
rna-XM_027956492.2	552.087	0.653135	0.250054	2.61198	0.00900194	0.358002	CAMKK2
rna-XM_042239647.1	12.2451	-0.937217	0.358994	-2.61067	0.00903638	0.359051	LPIN2
rna-XM_042233066.1	20.9009	7.89749	3.02786	2.60827	0.00910008	0.361259	AMPD3
rna-XM_012103168.3	1.26532	3.86465	1.48299	2.60599	0.00916103	0.362863	C22H10orf62
rna-XM_042243958.1	20.8125	7.89177	3.02787	2.60638	0.00915056	0.362863	STEAP3
rna-XM_042254461.1	15.5416	7.46981	2.86657	2.60584	0.00916493	0.362863	NDUFAF6
rna-XM_012175657.4	265.307	0.531528	0.204173	2.60332	0.00923255	0.364567	CBY1
rna-XM_015095930.3	45.9959	-5.09028	1.95506	-2.60364	0.0092239	0.364567	KIF3A
rna-XR_003588699.2	21.7491	0.885617	0.34016	2.60353	0.00922698	0.364567	LOC114113923
rna-XM_015093090.3	3.64987	-3.00056	1.15285	-2.60274	0.00924808	0.364616	NEFL
rna-XM_042230049.1	50.9825	7.25103	2.786	2.60267	0.00925017	0.364616	C1H21orf91
rna-XM_042236487.1	37.7399	1.99701	0.767526	2.60188	0.00927136	0.365128	SLC41A3
rna-XM_012189524.4	14.565	-7.28699	2.80158	-2.60103	0.00929454	0.365717	IL34
rna-XM_027956585.2	64.4709	-1.71738	0.660606	-2.5997	0.00933055	0.366809	LOC101112122
rna-XM_042250131.1	157.139	-0.601525	0.231431	-2.59916	0.00934523	0.367062	SH3GL1
rna-XR_006057314.1	44.064	2.10519	0.810052	2.59884	0.00935398	0.367082	BAG6
rna-XM_027974805.2	108.13	-1.29887	0.499878	-2.59838	0.00936661	0.367254	TOP3A
rna-XM_012172449.4	21.7477	-7.86566	3.0277	-2.5979	0.00937968	0.367317	PREPL
rna-XM_027976123.2	41.4898	-0.995329	0.383156	-2.59771	0.00938474	0.367317	HCN3
rna-XM_027979965.2	54.5019	-0.931191	0.35852	-2.59732	0.00939544	0.367413	AHRR
rna-XR_006056514.1	6.9354	2.30179	0.886715	2.59586	0.00943539	0.368651	SLC38A9
rna-XM_042237659.1	251.73	-4.45281	1.71581	-2.59516	0.00945463	0.369079	TRPM2
rna-XM_015105078.3	20.2825	7.85419	3.02791	2.59393	0.00948866	0.369435	KLHL13
rna-XM_027980154.2	2673.01	0.166486	0.0641779	2.59413	0.00948305	0.369435	MYO10
rna-XM_042233709.1	6.34006	-4.88609	1.88363	-2.59397	0.00948734	0.369435	RAD17
rna-XM_027962728.2	20.2513	7.85219	3.02792	2.59326	0.00950696	0.369824	SNX25
rna-XM_042257210.1	11.7523	0.925153	0.356835	2.59266	0.00952361	0.370148	CCDC181
rna-XM_027958897.2	48.2137	6.16922	2.38259	2.58929	0.00961747	0.372819	IFT80
rna-XM_027961082.2	222.352	1.90422	0.735345	2.58957	0.00960966	0.372819	LMAN1
rna-XM_042231767.1	21.3764	-7.84092	3.02773	-2.5897	0.00960586	0.372819	FHOD1
rna-XM_027969510.2	13.5898	-7.18763	2.77897	-2.58644	0.00969729	0.375122	PODNL1
rna-XM_027973804.2	13.0646	7.21996	2.79165	2.58627	0.00970215	0.375122	MCF2L
rna-XM_042240676.1	19.9602	7.83147	3.02794	2.5864	0.00969839	0.375122	ZNF48
rna-XM_004003361.4	15907.1	2.23557	0.865241	2.58375	0.0097732	0.37595	TFF3
rna-XM_027969579.2	7.1347	-5.06303	1.95913	-2.58432	0.00975708	0.37595	LOC101103602
rna-XM_042237489.1	75.2538	1.76906	0.684697	2.58371	0.00977426	0.37595	LOC101107315
rna-XM_042248964.1	944.854	1.42706	0.552216	2.58425	0.00975912	0.37595	TCAF2
rna-XM_042252375.1	26.721	3.86663	1.4962	2.5843	0.00975775	0.37595	BNIP2
rna-XM_042256857.1	59.7162	1.28454	0.497077	2.5842	0.00976065	0.37595	TLR5
rna-XM_042231182.1	43.9168	-2.90998	1.1266	-2.58298	0.009795	0.376097	LOC101108416
rna-XR_006058750.1	11.8975	6.49486	2.5143	2.58317	0.00978981	0.376097	LOC105609277
rna-XM_042238206.1	19.7815	7.81814	3.02796	2.58198	0.00982339	0.376863	PAK1
rna-XM_027959292.2	17.1117	7.60946	2.94766	2.58152	0.00983656	0.377043	CCDC15
rna-XM_012097889.3	3497.43	0.475893	0.184453	2.58002	0.00987943	0.378035	RPL6
rna-XM_042255042.1	17.7164	-1.68311	0.65234	-2.58011	0.00987683	0.378035	ITGBL1
rna-XM_042234057.1	24.1778	3.03695	1.17738	2.57943	0.00989649	0.378362	ANAPC5
rna-XM_042255476.1	19.5943	7.80457	3.02797	2.57749	0.00995212	0.380162	ABR
rna-XM_004013238.5	226.242	0.210228	0.0816636	2.57432	0.0100438	0.381074	MRM3
rna-XM_027965756.2	14.8683	-7.31729	2.84128	-2.57535	0.0100138	0.381074	MAPKAP1
rna-XM_027978484.2	11.8235	7.07562	2.7471	2.57567	0.0100045	0.381074	ERCC1
rna-XM_042239226.1	12.9722	7.2095	2.80027	2.57457	0.0100365	0.381074	RELCH
rna-XM_042245078.1	20.7924	-7.80062	3.02777	-2.57636	0.00998471	0.381074	PHACTR4
rna-XM_042249977.1	28.3783	2.13931	0.830854	2.57483	0.0100289	0.381074	RGL3
rna-XM_042253298.1	20.7036	-7.79439	3.02778	-2.57429	0.0100445	0.381074	TUBE1
rna-XR_006058379.1	18.2423	-1.63575	0.635093	-2.57561	0.0100063	0.381074	LOC114111361
rna-XM_042232731.1	54.4155	-4.78467	1.85913	-2.5736	0.0100646	0.381149	TFRC
rna-XM_042255059.1	9.26173	3.49502	1.35816	2.57334	0.0100722	0.381149	CARS2
rna-XR_006059421.1	1.43362	-3.95625	1.53723	-2.57363	0.0100639	0.381149	LOC121819197
rna-XM_027972435.2	17.5423	-0.730456	0.284005	-2.57199	0.0101117	0.382319	FHL5
rna-XM_027969485.2	10.8124	-2.64997	1.03054	-2.57145	0.0101273	0.382585	GIPC1
rna-XM_012106519.4	78.2357	-0.732061	0.284795	-2.57048	0.0101557	0.383331	GPR34
rna-NM_001163599.1	20.1388	2.9993	1.16721	2.56964	0.0101804	0.383939	SLC39A13
rna-XM_027969306.2	90.9613	1.6386	0.638192	2.56756	0.0102417	0.385923	GUK1
rna-XM_027975639.2	13.3155	-7.15776	2.78851	-2.56688	0.0102619	0.386359	MAD2L2
rna-XM_012175983.4	20.343	-7.76932	3.02781	-2.56599	0.0102882	0.38658	CDC7
rna-XM_027975784.2	20.3503	-7.77018	3.02781	-2.56627	0.0102798	0.38658	MIB2
rna-XM_042232388.1	27.5009	2.87829	1.12179	2.5658	0.0102939	0.38658	KALRN
rna-XM_042240806.1	16.5784	1.83099	0.71384	2.56499	0.0103179	0.387156	NCOA4
rna-XM_015104543.3	20.2257	-7.76096	3.02782	-2.56322	0.0103706	0.388358	MCPH1
rna-XM_027961487.2	19.021	7.76147	3.02803	2.56321	0.0103709	0.388358	TSC2
rna-XR_006058340.1	65.7004	-1.06614	0.415969	-2.56304	0.0103761	0.388358	LOC114111438
rna-XM_042230466.1	20.1962	-7.75888	3.02782	-2.56253	0.0103912	0.388596	CUL2
rna-XM_012152840.4	45.4291	4.14481	1.61771	2.56215	0.0104028	0.388702	PARS2
rna-XM_004013725.4	744.768	-0.189218	0.0739194	-2.55979	0.0104736	0.389292	EXOSC10
rna-XM_004020007.5	11.3308	7.01517	2.74172	2.55867	0.0105072	0.389292	A1CF
rna-XM_004020858.5	1049.55	0.185259	0.072395	2.55899	0.0104975	0.389292	XPO6
rna-XM_027959215.2	41.8963	-6.67178	2.60692	-2.55926	0.0104895	0.389292	HIVEP1
rna-XM_027976354.2	54.4586	-0.541754	0.211514	-2.56131	0.0104278	0.389292	HNF4A
rna-XM_027977129.2	14.4672	-7.27759	2.84406	-2.55888	0.0105011	0.389292	CEP250
rna-XM_042240625.1	18.9074	7.75288	3.02804	2.56036	0.0104563	0.389292	TSC2
rna-XM_042248119.1	14.6591	-7.29641	2.85192	-2.55842	0.0105148	0.389292	DCTN1
rna-XM_042256192.1	20.0602	-7.74913	3.02783	-2.5593	0.0104883	0.389292	BPTF
rna-XM_042256228.1	54.0705	1.57278	0.614415	2.55979	0.0104735	0.389292	CSNK1D
rna-XR_006055717.1	1.43813	-3.94469	1.54134	-2.55927	0.0104894	0.389292	LOC121816229
rna-XM_012188383.4	18.7958	7.74491	3.02805	2.55772	0.010536	0.389754	MCM10
rna-XM_042242893.1	18.7619	7.74185	3.02805	2.55671	0.0105667	0.390565	SUSD1
rna-XM_042237192.1	3.28539	2.01364	0.787684	2.55641	0.0105759	0.390579	LOC101118484
rna-XM_042231949.1	10.0318	-2.63936	1.03282	-2.5555	0.0106036	0.391278	SLC7A10
rna-XM_042244485.1	18.6873	7.73638	3.02806	2.5549	0.0106219	0.391629	PIGV
rna-XM_027963865.2	11.9358	-7.00032	2.7403	-2.55458	0.0106315	0.391659	LCK
rna-XM_004013030.5	45.9577	-0.574	0.224791	-2.55349	0.0106651	0.392195	MILR1
rna-XM_042241897.1	2.1733	-4.54782	1.78114	-2.55332	0.0106701	0.392195	CXHXorf65
rna-XR_003585774.2	13.341	-7.16105	2.80469	-2.55324	0.0106725	0.392195	GTL2
rna-XM_042255276.1	19.7676	-7.72768	3.02785	-2.5522	0.0107046	0.393049	TSPOAP1
rna-XM_004013051.5	103.266	-1.21321	0.475427	-2.55182	0.0107161	0.393148	CD7
rna-XM_027971957.2	497.602	-0.442256	0.173383	-2.55074	0.0107493	0.394041	SRSF5
rna-XM_027966001.2	5.73506	1.69138	0.663421	2.54948	0.0107884	0.394085	LOC114113831
rna-XM_027974889.2	96.7623	3.56295	1.39763	2.54928	0.0107945	0.394085	GAS7
rna-XM_027976490.2	11.0614	6.97948	2.73798	2.54914	0.010799	0.394085	KIF16B
rna-XM_042246206.1	12.31	-7.04462	2.76263	-2.54997	0.0107734	0.394085	FOXN2
rna-XM_042254150.1	31.443	-6.80681	2.6707	-2.5487	0.0108125	0.394085	FER1L6
rna-XR_003591971.2	27.1269	1.29804	0.509284	2.54876	0.0108108	0.394085	SLC7A11
rna-XR_006055856.1	19.6709	-7.72094	3.02786	-2.54997	0.0107733	0.394085	ST3GAL6
rna-XM_042232057.1	19.5696	-7.71377	3.02787	-2.54759	0.010847	0.394697	PLD3
rna-XR_006060084.1	13.7078	7.28981	2.86139	2.54764	0.0108453	0.394697	TLR6
rna-XM_012106842.3	10.1551	6.85686	2.69235	2.5468	0.0108716	0.394877	PJA1
rna-XM_027957116.2	10.0679	-1.00415	0.394389	-2.54609	0.0108938	0.394877	SAXO2
rna-XM_027969739.2	13.3367	-7.16002	2.81314	-2.54521	0.0109212	0.394877	TIMM44
rna-XM_042231811.1	19.4784	-7.70665	3.02788	-2.54523	0.0109205	0.394877	CARMIL2
rna-XM_042232960.1	19.4784	-7.70666	3.02788	-2.54524	0.0109204	0.394877	DPAGT1
rna-XM_042241687.1	10.6455	6.92409	2.71994	2.54568	0.0109066	0.394877	TASL
rna-XM_042244898.1	6.07297	4.91745	1.93164	2.54574	0.0109046	0.394877	BAZ2B
rna-XR_006055939.1	7.25315	-5.68596	2.23403	-2.54515	0.010923	0.394877	LOC101103174
rna-XM_004014239.5	98.9202	-1.10154	0.433197	-2.54282	0.0109963	0.395465	DCLRE1C
rna-XM_012178706.4	24.0548	-1.15151	0.452662	-2.54387	0.0109633	0.395465	STK32A
rna-XM_027964664.2	11.7336	7.06476	2.77769	2.54339	0.0109781	0.395465	FAM168B
rna-XM_042238004.1	19.3949	-7.70018	3.02789	-2.54309	0.0109877	0.395465	STT3A
rna-XM_042240656.1	808.154	0.660863	0.259764	2.54409	0.0109564	0.395465	GLYR1
rna-XM_042243282.1	18.2442	7.70204	3.0281	2.54352	0.0109742	0.395465	RUSC2
rna-XM_042249093.1	19.3619	-7.69802	3.02789	-2.54237	0.0110103	0.395465	NOM1
rna-XM_042254427.1	38.8127	-3.15586	1.24129	-2.5424	0.0110094	0.395465	ZNF687
rna-XM_042237374.1	48.3631	-1.16796	0.459481	-2.54192	0.0110247	0.395661	BAG6
rna-XM_042234358.1	98.8727	-4.78507	1.88292	-2.5413	0.0110441	0.395839	ANKRD50
rna-XM_042246450.1	31.2652	6.7435	2.65367	2.5412	0.0110474	0.395839	INPP4A
gene-LOC101113472	17.0933	-0.816096	0.32128	-2.54014	0.0110808	0.396397	LOC101113472
rna-XM_042245891.1	12.0999	-7.02003	2.76339	-2.54037	0.0110736	0.396397	CENPA
rna-XM_027962658.2	693.867	0.951842	0.374992	2.5383	0.0111392	0.398166	FAM149A
rna-XM_042232604.1	12.2993	7.13246	2.81051	2.53778	0.0111558	0.398441	ARNTL
rna-XM_027956851.2	162.855	1.66118	0.654989	2.53619	0.0112065	0.399929	GUCD1
rna-XM_012182071.4	45.1775	-1.15942	0.457607	-2.53365	0.0112881	0.400711	LOC101108756
rna-XM_012186999.4	8.37282	1.05499	0.416253	2.53449	0.0112612	0.400711	MRPL39
rna-XM_027966263.2	221.473	1.12661	0.444676	2.53355	0.0112914	0.400711	PRRC2B
rna-XM_042238894.1	30.0275	-0.657144	0.259375	-2.53357	0.0112907	0.400711	JAKMIP3
rna-XM_042240456.1	12.4985	-7.06719	2.78781	-2.53503	0.0112438	0.400711	HMOX2
rna-XM_042252977.1	3.44311	-1.92138	0.758265	-2.53392	0.0112796	0.400711	SLC7A7
rna-XR_006060832.1	18.3464	-2.42909	0.958484	-2.53431	0.011267	0.400711	PDE7A
rna-XM_042234272.1	25.6439	-1.54715	0.610746	-2.53321	0.0113024	0.400779	FHDC1
rna-XM_042257128.1	18.9457	-7.66665	3.02793	-2.53198	0.011342	0.401863	LBR
rna-XM_004020845.4	925.366	-0.697275	0.275431	-2.53158	0.011355	0.402005	RBBP6
rna-XM_042256337.1	10.5449	6.9104	2.73039	2.53093	0.0113762	0.402434	TAGLN2
rna-XM_027969348.2	222.369	0.635964	0.251468	2.529	0.0114388	0.404022	GATAD2A
rna-XM_042237810.1	17.6973	7.65819	3.02816	2.52899	0.0114392	0.404022	CD151
rna-XM_027973542.2	66.5232	3.86379	1.52814	2.52842	0.0114576	0.404035	IGSF3
rna-XM_042230306.1	18.8049	-7.6559	3.02794	-2.52842	0.0114577	0.404035	DHTKD1
rna-XM_027960295.2	48.7295	1.00706	0.398386	2.52786	0.0114761	0.404361	TLL2
rna-XM_012173607.4	421.822	-0.314317	0.124384	-2.52699	0.0115046	0.405045	NAGK
rna-XM_027957239.2	180.235	2.01189	0.796319	2.52649	0.0115209	0.405097	OPA1
rna-XM_027957790.2	1.94123	-4.37044	1.73027	-2.52587	0.0115411	0.405097	LOC114109334
rna-XM_027960566.2	17.5869	7.64866	3.02818	2.52583	0.0115425	0.405097	TBC1D12
rna-XM_042250738.1	17.6026	7.65021	3.02817	2.52634	0.0115257	0.405097	PKN2
rna-XM_027961097.2	361.423	-0.410617	0.162614	-2.5251	0.0115665	0.40562	C23H18orf32
rna-XM_015094419.3	16.1131	2.3325	0.923836	2.5248	0.0115763	0.405644	TMEM178A
rna-XM_042247097.1	13.969	2.63147	1.04255	2.52406	0.0116006	0.406178	CCDC38
rna-XM_015099832.3	756.078	-0.321783	0.127526	-2.52328	0.0116267	0.406371	MAPRE1
rna-XM_027961134.2	17.483	7.64033	3.02819	2.52307	0.0116336	0.406371	LAT2
rna-XM_042244435.1	18.6065	-7.64078	3.02796	-2.52341	0.0116223	0.406371	LOC101111609
rna-XM_012186926.4	32.2692	1.32625	0.525893	2.5219	0.0116722	0.40739	GOLT1A
rna-XM_027979555.2	961.271	0.209274	0.0829913	2.52164	0.011681	0.40739	THAP12
rna-XM_027972495.2	3310.43	0.787416	0.312368	2.5208	0.0117089	0.408043	ARFGEF3
rna-XM_027968436.2	18.4565	-7.62889	3.02797	-2.51947	0.0117531	0.40894	AKAP9
rna-XM_042240416.1	128.08	1.24022	0.492219	2.51966	0.0117468	0.40894	SUN1
rna-XM_042241708.1	11.6425	-6.96419	2.76595	-2.51783	0.0118081	0.410534	HUWE1
rna-XM_042243837.1	18.371	-7.62245	3.02798	-2.51734	0.0118245	0.410785	GPD2
rna-XM_012106687.4	58.6787	-0.740167	0.294139	-2.51638	0.0118566	0.411256	GSPT2
rna-XM_027967989.2	2.85336	3.78041	1.50216	2.51664	0.0118479	0.411256	FGF23
rna-XM_027977417.2	17.2135	7.61765	3.02822	2.51555	0.0118846	0.411907	LOC101122457
rna-XM_012100761.3	468.899	0.794276	0.315806	2.51507	0.0119007	0.412144	ENPP5
rna-XM_042255418.1	54.4959	-7.40413	2.9451	-2.51405	0.0119355	0.413027	RFFL
rna-XM_042250268.1	4.39456	-3.41129	1.35736	-2.51319	0.0119645	0.413387	CDC42SE2
rna-XM_042254491.1	17.1269	7.6108	3.02823	2.51328	0.0119613	0.413387	TPM3
rna-XM_027962174.2	39.9957	-2.80357	1.1158	-2.51261	0.011984	0.413742	SLC25A16
rna-NM_001145180.1	2774.53	-0.487178	0.193916	-2.51232	0.0119941	0.413769	FABP5
rna-XM_042236367.1	126.543	-1.12454	0.447894	-2.51072	0.0120484	0.415259	ALS2CL
rna-XM_042244282.1	10.4532	-6.80902	2.71242	-2.51031	0.0120624	0.415259	LOC101117054
rna-XM_042249599.1	127.119	2.50601	0.998427	2.50996	0.0120746	0.415259	UPF1
rna-XR_006055810.1	16.4229	-3.56441	1.42003	-2.51009	0.0120701	0.415259	NDUFAF5
rna-XM_042235853.1	6.41752	1.17577	0.468682	2.50868	0.0121183	0.41644	LOC105603365
rna-XM_027957082.2	42.1316	-1.70464	0.679692	-2.50796	0.0121431	0.416666	FES
rna-XM_027958654.2	86.4871	1.5153	0.604201	2.50794	0.0121436	0.416666	VPS52
rna-XM_042255850.1	9.38459	6.74274	2.68885	2.50767	0.0121531	0.41667	PHOSPHO1
rna-XM_012097504.3	16.8964	7.59118	3.02826	2.50678	0.0121836	0.416753	MFSD8
rna-XM_042242992.1	218.186	-0.336132	0.134089	-2.50679	0.0121835	0.416753	CARD19
rna-XR_006061042.1	116.547	-0.660537	0.263457	-2.50719	0.0121695	0.416753	LOC121820478
rna-XM_027961844.2	1556.85	-0.269817	0.107688	-2.50555	0.0122262	0.417566	GLYR1
rna-XM_042238722.1	27.2014	-1.42694	0.569475	-2.50571	0.0122207	0.417566	OXNAD1
rna-XM_012176362.4	16.8348	7.58602	3.02827	2.50507	0.0122427	0.417622	DYNC1I1
rna-XM_027964445.2	16.8372	7.58568	3.02827	2.50496	0.0122466	0.417622	RUSC2
gene-LOC105605863	294.935	-0.905533	0.36158	-2.50438	0.0122667	0.417818	LOC105605863
rna-XM_027973352.2	76.2576	2.2968	0.917159	2.50425	0.0122711	0.417818	LRRC24
rna-NM_001162544.1	7.81596	-2.74145	1.09504	-2.50351	0.0122967	0.418214	ARF1
rna-XM_015096477.3	12.9338	-7.11599	2.84329	-2.50273	0.012324	0.418214	LIMCH1
rna-XM_027965668.2	2088.72	0.241857	0.096654	2.50229	0.0123391	0.418214	SDHB
rna-XM_027966568.2	16.7668	7.57961	3.02827	2.50295	0.0123165	0.418214	DTNB
rna-XM_042231463.1	10.944	-6.87464	2.74723	-2.50239	0.0123359	0.418214	BOC
rna-XM_042245819.1	17.8269	-7.57885	3.02803	-2.50289	0.0123182	0.418214	GEN1
rna-XM_027978538.2	7.94725	4.29767	1.718	2.50156	0.0123649	0.418769	MEIS3
rna-XM_042234689.1	17.7716	-7.57398	3.02804	-2.50128	0.0123745	0.418776	MLEC
rna-XM_042242099.1	16.668	7.57139	3.02829	2.50022	0.0124116	0.419711	SEPTIN6
rna-NM_001127291.1	45.7166	0.598297	0.239345	2.49973	0.0124289	0.419977	SLC25A10
rna-XM_012103302.4	218.817	0.638946	0.255944	2.49642	0.0125452	0.42103	DSEL
rna-XM_012142009.4	17.6029	-7.56052	3.02806	-2.49682	0.0125312	0.42103	KCTD18
rna-XM_015092359.3	286.45	0.618198	0.247653	2.49623	0.0125522	0.42103	SON
rna-XM_027976328.2	2607.28	0.197035	0.0789353	2.49616	0.0125546	0.42103	HNRNPU
rna-XM_042230925.1	46.0475	-1.82403	0.73012	-2.49826	0.0124806	0.42103	HHLA2
rna-XM_042243596.1	35.1718	-0.560711	0.224529	-2.49728	0.0125151	0.42103	LOC101122496
rna-XM_042247225.1	16.0171	-1.59752	0.639533	-2.49795	0.0124915	0.42103	LOC101104893
rna-XM_042249283.1	227.409	-1.32081	0.529075	-2.49645	0.0125443	0.42103	SMARCD3
rna-XM_042249699.1	17.6009	-7.56058	3.02806	-2.49684	0.0125305	0.42103	COLGALT1
rna-XM_042253580.1	52.5058	3.96807	1.58841	2.49814	0.0124848	0.42103	UTRN
rna-XM_027967745.2	17.5625	-7.55729	3.02806	-2.49575	0.0125691	0.421031	NCDN
rna-XM_042234634.1	29.1762	3.67873	1.47407	2.49562	0.0125736	0.421031	LOC101107047
rna-XM_027973327.2	1187.3	-0.377842	0.151431	-2.49514	0.0125909	0.421293	CPSF1
rna-XR_006059725.1	26.1196	0.94514	0.378914	2.49434	0.0126193	0.421927	TCAF2
rna-XM_042257254.1	10.4819	6.90228	2.76771	2.49386	0.0126362	0.422174	FBXO6
rna-XM_027958653.2	62.9292	2.30365	0.924161	2.49269	0.0126779	0.422614	VPS52
rna-XM_042234431.1	60.2551	-1.37838	0.552963	-2.49272	0.0126767	0.422614	ZNF84
rna-XM_042249569.1	894.362	-0.244536	0.0980832	-2.49315	0.0126615	0.422614	GATAD2A
rna-XM_042246728.1	3.115	-3.22727	1.29487	-2.49236	0.0126898	0.422696	LOC101115614
rna-XM_042238916.1	14.0446	7.32475	2.93966	2.4917	0.0127133	0.423163	HPS1
rna-XM_042235836.1	11.7604	-1.23413	0.495418	-2.4911	0.012735	0.423566	LRRFIP2
rna-XM_004019380.5	912.739	0.689875	0.276976	2.49074	0.0127479	0.423679	C21H11orf54
rna-XM_027959386.2	753.436	-0.479868	0.192734	-2.48979	0.0127817	0.424487	TCIRG1
rna-XM_027958361.2	332.531	-1.05834	0.425327	-2.4883	0.0128356	0.425008	LOC114109518
rna-XM_027962186.2	16.2589	7.53562	3.02834	2.48837	0.0128331	0.425008	RUFY2
rna-XM_042232349.1	13.8259	-2.46122	0.989112	-2.48831	0.0128352	0.425008	LOC121816554
rna-XM_042243597.1	10.2512	-6.78087	2.72432	-2.48902	0.0128097	0.425008	WDR33
rna-XM_012100685.3	17.2369	-7.53028	3.0281	-2.4868	0.0128897	0.426482	RPL7L1
rna-XM_027972547.2	9.19815	6.71349	2.70031	2.48619	0.0129119	0.426899	GPSM2
rna-XM_004021005.5	160.06	0.677396	0.272545	2.48545	0.0129388	0.427471	POP7
rna-XM_004007220.5	17.1645	-7.52397	3.02811	-2.48471	0.0129657	0.427724	LOC101108121
rna-XM_042230155.1	15.4365	7.46069	3.00232	2.48497	0.0129561	0.427724	L3MBTL1
rna-XM_027965192.2	17.1351	-7.52173	3.02811	-2.48397	0.0129927	0.427979	LOC101111607
rna-XM_042236908.1	10.0021	-1.14992	0.46289	-2.48423	0.0129833	0.427979	DAXX
rna-XM_004017459.5	9881.97	0.362319	0.145899	2.48335	0.0130154	0.428095	XBP1
rna-XM_042252118.1	17.1179	-7.52028	3.02811	-2.48349	0.0130102	0.428095	UACA
rna-XM_012098811.4	74.0621	6.40493	2.5797	2.48281	0.0130349	0.428102	RALGAPA1
rna-XM_042242465.1	17.108	-7.51902	3.02811	-2.48307	0.0130255	0.428102	MID2
rna-XM_042236263.1	11.0272	-2.60951	1.05156	-2.48155	0.0130812	0.429308	SLC26A6
rna-XM_042247833.1	10.2595	-6.78142	2.7337	-2.48068	0.0131133	0.430041	POLDIP3
rna-XM_027974479.2	791.471	0.205777	0.082966	2.48025	0.013129	0.430239	LOC101112076
rna-XM_004014616.5	85.4851	-0.578274	0.233266	-2.47903	0.013174	0.430763	CD40
rna-XM_042244437.1	16.9736	-7.50809	3.02813	-2.47945	0.0131585	0.430763	LOC101111609
rna-XM_042249904.1	11.7628	7.06782	2.85099	2.47908	0.0131722	0.430763	FBXL12
rna-XM_042233020.1	15.9417	7.50662	3.02838	2.47875	0.0131842	0.43078	NUCB2
rna-XM_042235497.1	5.62718	-5.31439	2.14641	-2.47594	0.0132884	0.433868	MBNL1
gene-LOC121816481	36.8626	-0.530325	0.214294	-2.47476	0.0133326	0.434622	LOC121816481
rna-NM_001146271.1	17.5003	2.66931	1.0789	2.47409	0.0133575	0.434622	MLPH
rna-XM_012096217.4	3729	0.302295	0.122172	2.47435	0.013348	0.434622	EHF
rna-XM_012189866.3	2.57336	-2.37965	0.961524	-2.47487	0.0133283	0.434622	DZIP3
rna-XM_027973675.2	14.0433	7.32432	2.9605	2.47402	0.0133604	0.434622	IFT88
rna-XM_015099805.3	823.513	0.284991	0.115293	2.47189	0.0134401	0.43655	TBC1D20
rna-XM_015101110.3	244.22	-0.317828	0.128592	-2.47159	0.0134512	0.43655	LMO2
rna-XM_042229266.1	26.1971	2.19627	0.888419	2.47211	0.013432	0.43655	TRAF3IP3
rna-XR_001434678.3	2.98749	-3.75925	1.52111	-2.47139	0.0134589	0.43655	SEPTIN8
rna-XM_042239872.1	20.9693	2.47541	1.00208	2.47026	0.0135016	0.437402	MCRIP2
rna-XM_042249190.1	205.895	0.610706	0.247258	2.46991	0.0135146	0.437402	SRPK2
rna-XR_006056372.1	16.6409	-7.47933	3.02817	-2.46992	0.0135143	0.437402	P2RY2
rna-XM_042230391.1	249.484	-0.850489	0.344637	-2.46778	0.0135953	0.439693	ZNF654
rna-XM_042255268.1	60.874	1.09293	0.443007	2.46708	0.013622	0.440237	VEZF1
rna-XM_012101647.3	3.24041	2.20879	0.895615	2.46623	0.0136543	0.440962	TMEM126A
rna-XM_012185794.4	16.4809	-7.46529	3.02819	-2.46527	0.0136911	0.441828	EPN2
rna-XM_042233673.1	11.4703	-0.863322	0.350458	-2.46341	0.0137622	0.44348	LOC105602450
rna-XM_042250301.1	19.216	4.56932	1.8547	2.46364	0.0137533	0.44348	CEP120
rna-XM_042232291.1	16.4033	-7.45836	3.0282	-2.46297	0.013779	0.443701	GYS1
rna-XM_042252922.1	522.34	-0.335682	0.13633	-2.46227	0.0138061	0.44422	IRF9
rna-XR_006057903.1	144.923	-7.1959	2.92274	-2.46203	0.0138151	0.44422	EME2
rna-XM_042246926.1	92.7413	-7.24936	2.94571	-2.46099	0.0138554	0.445193	FRS2
rna-XM_027962943.2	26.1179	-5.39034	2.19126	-2.45993	0.0138963	0.445222	ZNF275
rna-XM_027968874.2	16.2963	-7.44931	3.02821	-2.45997	0.0138947	0.445222	DENND2A
rna-XM_042236097.1	11.1283	6.98913	2.84065	2.46039	0.0138784	0.445222	PBRM1
rna-XM_042255105.1	16.322	-7.45133	3.0282	-2.46064	0.0138689	0.445222	TMCO3
rna-XM_027958242.2	1817.58	0.223081	0.0907142	2.45916	0.0139262	0.445859	PDHB
rna-XM_042235861.1	45.2703	4.6199	1.8793	2.45831	0.0139594	0.4466	VILL
id-LOC101115949	24.4226	-1.41626	0.576249	-2.45773	0.013982	0.44668	LOC101115949
rna-XM_042241565.1	150.522	-1.24004	0.50453	-2.45782	0.0139783	0.44668	TMSB4X
rna-XM_015096959.3	15.2356	7.44185	3.02848	2.45729	0.0139991	0.446822	TMEM62
rna-XM_042233124.1	7.9693	6.50736	2.64849	2.457	0.0140102	0.446822	LOC101118897
rna-XM_042233415.1	16.1837	-7.43934	3.02822	-2.45667	0.0140231	0.446822	PHF21A
rna-XM_042252224.1	11.9702	-7.00407	2.85114	-2.45658	0.0140266	0.446822	CEPT1
rna-XM_004007693.5	687.698	0.32678	0.133042	2.45622	0.0140407	0.446839	DDC
rna-XM_042250230.1	15.7992	0.777841	0.316703	2.45605	0.0140472	0.446839	MOB3A
rna-XM_027973956.2	15.1384	7.43259	3.0285	2.45422	0.0141192	0.447934	SHMT1
rna-XM_042237273.1	16.0986	-7.43173	3.02823	-2.45415	0.0141219	0.447934	LOC101115833
rna-XM_042245535.1	4.0183	-2.14923	0.875644	-2.45446	0.0141097	0.447934	USP20
rna-XM_042247219.1	125.564	-2.37912	0.969423	-2.45416	0.0141215	0.447934	LOC105605766
rna-XM_012131940.3	8.04194	6.52033	2.65727	2.45377	0.0141366	0.448081	PDE1A
rna-XM_027967229.2	1079.9	0.51791	0.211089	2.45351	0.0141469	0.44809	SMUG1
rna-XM_004009967.5	120.627	-2.02854	0.827165	-2.4524	0.0141908	0.448646	ARHGAP24
rna-XM_015091895.3	233.161	0.55278	0.225383	2.45262	0.0141819	0.448646	CTPS1
rna-XM_042235405.1	39.0364	-1.54049	0.628242	-2.45206	0.014204	0.448646	LOC101116867
rna-XM_042245208.1	16.0248	-7.42538	3.02824	-2.45204	0.0142048	0.448646	MAPKAP1
rna-XM_012101197.4	15.0236	7.42106	3.02852	2.45039	0.01427	0.450386	MRS2
rna-XM_012178435.3	560.356	-0.652474	0.26635	-2.44968	0.0142981	0.450634	CFD
rna-XM_027964148.2	15.0029	7.41963	3.02852	2.44992	0.0142887	0.450634	FSD1L
rna-XM_042231240.1	15.9177	-7.41562	3.02826	-2.44881	0.0143329	0.451412	ZNF471
rna-XM_004002877.5	437.264	0.610862	0.249667	2.44671	0.0144168	0.452575	TBC1D23
rna-XM_004004772.5	137.722	-0.326753	0.13369	-2.44411	0.0145212	0.452575	GYPC
rna-XM_004017420.5	321.674	0.490376	0.200873	2.44122	0.0146379	0.452575	COQ5
rna-XM_015094430.3	14.8098	7.40098	3.02855	2.44374	0.014536	0.452575	ATL2
rna-XM_027963111.2	15.8427	-7.40851	3.02827	-2.44645	0.0144269	0.452575	SLITRK4
rna-XM_027965473.2	14.358	-4.13332	1.69238	-2.44232	0.0145933	0.452575	UBXN11
rna-XM_027974334.2	22.045	3.59126	1.46857	2.44542	0.0144683	0.452575	CEP95
rna-XM_027976003.2	14.7928	7.39956	3.02855	2.44327	0.014555	0.452575	CAMSAP2
rna-XM_042230104.1	1.10907	-3.58217	1.46517	-2.44488	0.0144902	0.452575	EPB41L1
rna-XM_042231992.1	34.3289	-6.39789	2.62018	-2.44178	0.0146152	0.452575	ATP4A
rna-XM_042233818.1	13.54	7.27155	2.97886	2.44105	0.0146445	0.452575	ZNF131
rna-XM_042236133.1	19.0881	-4.97413	2.03239	-2.44743	0.0143878	0.452575	PCBP4
rna-XM_042240496.1	38.4627	5.11704	2.09356	2.44419	0.014518	0.452575	ERI2
rna-XM_042243133.1	23.8767	2.47987	1.01416	2.44524	0.0144754	0.452575	SORBS3
rna-XM_042243283.1	65.124	-4.90518	2.00774	-2.44313	0.0145604	0.452575	RUSC2
rna-XM_042243475.1	33.6349	-1.37799	0.564426	-2.4414	0.0146304	0.452575	SLC24A2
rna-XM_042243688.1	4.72705	3.95447	1.61796	2.44411	0.0145211	0.452575	MTX2
rna-XM_042244973.1	4.04416	2.19865	0.898545	2.4469	0.0144091	0.452575	CARF
rna-XM_042250807.1	9.52079	6.76391	2.76855	2.44313	0.0145607	0.452575	ZNF644
rna-XM_042252109.1	12.8362	7.195	2.94427	2.44373	0.0145363	0.452575	PAQR5
rna-XM_042253565.1	14.7948	7.39894	3.02855	2.44306	0.0145633	0.452575	PLAGL1
rna-XM_042254071.1	18.0602	4.01947	1.64596	2.44202	0.0146052	0.452575	ST3GAL1
rna-XM_042256265.1	1.34686	3.23309	1.32416	2.44161	0.0146218	0.452575	USP36
rna-XM_042256966.1	10.6821	6.92904	2.83646	2.44284	0.014572	0.452575	DSTYK
rna-XR_003588778.2	305.659	0.498986	0.204097	2.44485	0.0144911	0.452575	HNRNPA1
rna-XR_003589197.2	20.8568	-4.0741	1.66563	-2.44598	0.0144458	0.452575	NRF1
rna-XR_006060699.1	15.6822	-7.39395	3.02829	-2.44163	0.0146212	0.452575	LOC114116172
rna-XM_015103414.3	631.324	-0.684048	0.280287	-2.44053	0.0146658	0.452919	SHOC2
rna-XM_042231505.1	15.6317	-7.38966	3.02829	-2.44021	0.0146789	0.453009	MBTPS1
rna-XM_004023089.5	9.00326	-1.66829	0.683897	-2.43939	0.0147121	0.453092	TIFAB
rna-XM_012102185.4	9.0767	6.69383	2.74391	2.43952	0.0147068	0.453092	LOC101119947
rna-XM_012189783.4	17.4223	-4.16207	1.70594	-2.43976	0.0146972	0.453092	LOC101114547
rna-XM_004002155.5	17.9916	3.16127	1.2966	2.43812	0.0147641	0.453452	CLCA2
rna-XM_027962919.2	9.13789	-2.50209	1.02645	-2.4376	0.0147849	0.453452	ABCD1
rna-XM_027968761.2	176.674	-1.01545	0.41656	-2.43769	0.0147814	0.453452	FAM3C
rna-XM_042231938.1	13.7348	7.29224	2.99063	2.43836	0.0147542	0.453452	CEP89
rna-XM_042233103.1	60.791	1.36091	0.558173	2.43815	0.0147626	0.453452	ZNF214
rna-XR_006060310.1	9.50147	6.76094	2.77332	2.43785	0.0147747	0.453452	LOC114115689
rna-XM_004004119.4	259.627	-0.776318	0.318528	-2.43721	0.0148012	0.453565	CCL21
rna-XM_042247600.1	18.1052	2.53689	1.04098	2.43702	0.014809	0.453565	LOC105612575
rna-XM_004020038.5	351.567	-1.20445	0.494449	-2.43595	0.0148527	0.454591	MYOF
rna-XM_042239396.1	55.8574	1.42292	0.584229	2.43556	0.0148688	0.454772	SNED1
rna-XM_015095486.3	8.06552	6.52439	2.6804	2.43411	0.0149285	0.456282	ZNF354C
rna-XM_042229567.1	7.6479	2.20726	0.907026	2.43351	0.0149532	0.456723	CREM
rna-XM_027967732.2	1893.32	-1.13851	0.467949	-2.43299	0.0149747	0.457069	LOC105605766
rna-XM_004013064.5	103.311	-0.695419	0.285999	-2.43155	0.0150345	0.458579	ANAPC11
rna-XM_042234937.1	15.3075	-7.35916	3.02834	-2.4301	0.0150947	0.4601	SH3D19
rna-XR_006056870.1	1.66142	4.24073	1.74541	2.42964	0.0151137	0.460361	LOC105603203
rna-XR_001041994.4	14.5583	-0.845031	0.347868	-2.42917	0.0151333	0.460645	LOC105614110
rna-XM_027964306.2	14.3421	7.35502	3.02863	2.4285	0.0151614	0.460648	GJB3
rna-XM_042229285.1	9.8115	-6.71747	2.76661	-2.42805	0.0151803	0.460648	CFHR5
rna-XM_042247886.1	15.2465	-7.35327	3.02835	-2.42815	0.0151761	0.460648	TTC38
rna-XM_042253444.1	14.3279	7.35346	3.02863	2.42798	0.015183	0.460648	PTPRK
rna-XR_006060663.1	15.2399	-7.35262	3.02835	-2.42793	0.0151852	0.460648	SCAF8
rna-XM_004003394.5	7.57996	6.43527	2.65139	2.42713	0.0152188	0.460725	FBXO25
rna-XM_042232692.1	11.5361	2.92151	1.20358	2.42736	0.0152093	0.460725	MPZL3
rna-XM_042235917.1	9.20188	6.71456	2.76611	2.42744	0.0152059	0.460725	TCAIM
gene-LOC106990106	342.152	-0.394027	0.162472	-2.4252	0.0153001	0.46091	LOC106990106
rna-XM_004020834.5	469.906	0.152102	0.0627313	2.42465	0.015323	0.46091	POLR3E
rna-XM_027960676.2	615.804	-0.511611	0.210928	-2.42552	0.0152865	0.46091	IGSF5
rna-XM_027967315.2	47.026	2.32665	0.958986	2.42616	0.0152596	0.46091	CSRNP2
rna-XM_027976700.2	19.3243	1.23739	0.510016	2.42617	0.015259	0.46091	MAP3K8
rna-XM_042239389.1	23.0738	1.85415	0.764524	2.42523	0.0152988	0.46091	INO80C
rna-XM_042251156.1	15.1292	-7.34241	3.02836	-2.42455	0.0153275	0.46091	ADAMTSL4
rna-XR_003585554.2	28.4723	-4.55151	1.87728	-2.42452	0.0153285	0.46091	LOC101112122
rna-XR_006057698.1	15.1417	-7.34342	3.02836	-2.42488	0.0153133	0.46091	ENTPD7
rna-XR_006058172.1	339.223	0.620287	0.255696	2.42588	0.0152714	0.46091	LOC114111046
rna-XM_012188659.3	45.9229	0.783487	0.323256	2.42374	0.0153618	0.461288	TMEM230
rna-XR_006057271.1	5.18486	2.25616	0.930831	2.42382	0.0153583	0.461288	LOC114109533
rna-XM_004017080.5	43.0892	-1.95136	0.805418	-2.42279	0.0154018	0.461827	RETREG1
rna-XM_015099673.3	9.01663	-6.59547	2.72266	-2.42244	0.0154167	0.461827	NKX2-2
rna-XM_042248730.1	137.164	-0.505508	0.208707	-2.42209	0.0154316	0.461827	GLI3
rna-XM_042249134.1	14.1636	7.33611	3.02866	2.42223	0.0154255	0.461827	KRIT1
rna-XM_042250792.1	22.6938	0.811036	0.334772	2.42265	0.0154078	0.461827	SLCO4C1
rna-XM_027969396.2	48.5499	-1.90805	0.788028	-2.42129	0.0154654	0.462528	KXD1
rna-XM_042229207.1	15.0182	-7.33132	3.02838	-2.42087	0.0154833	0.462753	KCNK2
rna-XM_012132979.3	754.106	-0.173695	0.0718038	-2.41902	0.0155622	0.46421	HNRNPA3
rna-XM_015094533.3	243.155	-0.767662	0.317321	-2.41919	0.015555	0.46421	MERTK
rna-XM_042244931.1	88.7756	-7.11924	2.94306	-2.419	0.0155634	0.46421	MGAT5
rna-XM_027970667.2	35.4281	-0.730092	0.301906	-2.41828	0.0155942	0.464819	LOC101116972
rna-XM_027970550.2	3.55784	2.72529	1.12709	2.41799	0.0156063	0.464868	PPIP5K2
rna-XM_042234440.1	15.6105	4.15219	1.71796	2.41693	0.0156522	0.465612	ZNF10
rna-XM_042234629.1	43.4811	-6.4005	2.64798	-2.41713	0.0156436	0.465612	ACAD10
rna-XM_042238821.1	14.8606	-7.31629	3.0284	-2.41589	0.0156967	0.466624	MXI1
rna-XM_042233822.1	89.6796	4.64495	1.92327	2.41513	0.0157294	0.467086	OXCT1
rna-XM_042246794.1	42.3177	1.43091	0.592499	2.41505	0.0157333	0.467086	ASB8
rna-XM_027958715.2	13.9084	7.31079	3.0287	2.41384	0.0157855	0.468173	LOC101123244
rna-XM_042233539.1	409.825	-1.93057	0.799834	-2.41371	0.0157909	0.468173	CELF1
rna-XM_004007326.5	798.942	-0.409315	0.169638	-2.41288	0.015827	0.468306	MFSD9
rna-XM_042243531.1	73.3696	3.07496	1.27427	2.41312	0.0158165	0.468306	INTS9
rna-XM_042251755.1	48.8171	-2.03162	0.841895	-2.41315	0.0158154	0.468306	SPON2
rna-NM_001304278.2	209.04	-0.328101	0.136024	-2.41209	0.0158614	0.468702	TMEM265
rna-XM_027961459.2	7.27875	6.37683	2.64364	2.41214	0.0158592	0.468702	FBXO25
rna-XM_012190275.4	1.88256	-4.32985	1.7955	-2.4115	0.0158871	0.469149	ZNF382
rna-XM_027967783.2	53.0024	2.54199	1.05428	2.41113	0.0159034	0.469318	RESF1
rna-XM_004010260.5	13.83	7.30138	3.02872	2.41072	0.0159212	0.469534	MAP2K5
rna-XM_012181724.4	170.585	0.400402	0.16616	2.40975	0.0159637	0.469557	TIMM9
rna-XM_012182695.3	8.78867	-3.3387	1.38548	-2.40978	0.0159623	0.469557	ATG5
rna-XM_027975033.2	14.6746	-7.29817	3.02843	-2.40988	0.0159576	0.469557	CAMTA2
rna-XM_042233440.1	14.663	-7.29698	3.02843	-2.40949	0.0159748	0.469557	PHF21A
rna-XM_042240244.1	30.5887	-3.84209	1.59453	-2.40954	0.0159728	0.469557	LOC101120367
rna-XM_004018951.5	598.16	0.789058	0.327555	2.40893	0.0159993	0.469707	BAG6
rna-XR_006059884.1	33.0674	-0.511971	0.212534	-2.40889	0.016001	0.469707	LOC121819612
rna-XM_004004361.5	244.693	-0.688569	0.285917	-2.40829	0.0160276	0.469953	PLGRKT
rna-XM_027958367.2	9.49605	5.00069	2.07651	2.40822	0.0160305	0.469953	TEAD3
rna-XM_042253562.1	14.5496	-7.28529	3.02845	-2.40562	0.0161452	0.473004	PLAGL1
rna-XM_027978364.2	302.018	-2.77994	1.15586	-2.40509	0.0161686	0.473377	ARHGEF1
rna-XM_015102289.3	10.7994	-6.85577	2.85169	-2.40411	0.016212	0.474087	ZNF852
rna-XM_027967866.2	862.743	0.354659	0.14754	2.40382	0.0162248	0.474087	YBX3
rna-XM_042249593.1	19.2468	3.21659	1.33801	2.40401	0.0162161	0.474087	SUGP2
rna-XM_027971739.2	14.4826	-7.27887	3.02846	-2.40349	0.0162395	0.474207	FRMD6
rna-XM_012098978.3	396.325	-1.1311	0.470942	-2.40178	0.0163157	0.474874	DDX24
rna-XM_015093079.3	14.4381	-7.27466	3.02847	-2.40209	0.0163016	0.474874	APTX
rna-XM_027959079.2	3.22824	-1.61935	0.673994	-2.40262	0.0162781	0.474874	LOC114109690
rna-XM_042230334.1	10.4691	1.47411	0.613649	2.40221	0.0162963	0.474874	RALY
rna-XM_042242633.1	13.5664	7.2745	3.02877	2.4018	0.0163144	0.474874	ADAMTSL3
rna-XM_012104350.4	188.135	-1.28941	0.536943	-2.40139	0.016333	0.475025	CORO1A
rna-XM_027963267.2	29.3594	4.39531	1.83048	2.40118	0.0163423	0.475025	TBL1X
rna-XM_012103917.4	530.688	-0.458042	0.190786	-2.40081	0.0163586	0.475191	IGSF5
rna-XM_004014332.5	1229.86	0.304282	0.126808	2.39955	0.016415	0.475587	GTPBP4
rna-XM_012174467.4	45.5478	-4.70624	1.96092	-2.40002	0.0163942	0.475587	PRICKLE1
rna-XM_042238678.1	19.3509	-6.52818	2.72045	-2.39966	0.0164101	0.475587	PCGF5
rna-XR_006056177.1	664.868	1.25011	0.520947	2.39969	0.0164091	0.475587	LOC121816514
rna-XM_004010893.5	409.915	-0.575964	0.240173	-2.39813	0.0164791	0.477132	RIPK3
rna-XM_027956586.2	439.617	-2.07794	0.866691	-2.39756	0.0165049	0.477568	LOC101110181
rna-NM_001009274.1	824.829	1.15464	0.482044	2.39531	0.0166063	0.477617	RCAN1
rna-XM_004015292.5	248.657	-0.49285	0.205745	-2.39544	0.0166004	0.477617	CD79A
rna-XM_012174305.4	47.7281	-5.1226	2.13793	-2.39606	0.0165724	0.477617	LARP4
rna-XM_012189921.3	184.436	-1.46851	0.612873	-2.3961	0.0165705	0.477617	TPPP3
rna-XM_015102101.3	14.2126	-7.25202	3.0285	-2.39459	0.016639	0.477617	RBMS3
rna-XM_027970687.2	14.2833	-7.25979	3.02849	-2.39716	0.0165226	0.477617	RNASE9
rna-XM_027971013.2	13.4117	7.25729	3.0288	2.3961	0.0165706	0.477617	AASDH
rna-XM_027978601.2	8.28588	-6.47401	2.7042	-2.39406	0.0166632	0.477617	PPFIA3
rna-XM_042234392.1	14.2188	-7.25258	3.0285	-2.39477	0.0166306	0.477617	RAPGEF2
rna-XM_042241419.1	583.35	0.887288	0.370574	2.39436	0.0166494	0.477617	NSD3
rna-XM_042246865.1	19.9891	7.24879	3.02795	2.39396	0.0166675	0.477617	C1H1orf210
rna-XM_042248207.1	8.11955	6.53264	2.72709	2.39546	0.0165996	0.477617	EMG1
rna-XM_042250040.1	9.60341	-6.68717	2.79193	-2.39518	0.0166122	0.477617	ADAMTS10
rna-XM_042251648.1	8.61767	-6.53047	2.72708	-2.39468	0.016635	0.477617	ZBTB49
rna-XR_006055673.1	6.80451	6.2795	2.62058	2.39623	0.0165648	0.477617	HM13
rna-XM_012185358.3	13.3379	7.24951	3.02881	2.39352	0.0166877	0.477887	ATAD5
rna-XM_042249175.1	14.1703	-7.24767	3.02851	-2.39315	0.0167045	0.478061	NAPEPLD
rna-XM_042246783.1	90.7207	-2.48034	1.03698	-2.39189	0.0167618	0.479393	PFKM
rna-XR_006061327.1	13.2771	7.24336	3.02882	2.39148	0.0167806	0.479622	C11H17orf80
rna-XM_042231835.1	13.2621	7.2417	3.02883	2.39093	0.0168059	0.479729	SMPD3
rna-XM_042252441.1	14.1071	-7.24158	3.02852	-2.39113	0.0167967	0.479729	RSL24D1
rna-XM_042238106.1	2.07496	-3.843	1.60756	-2.39058	0.0168219	0.479878	PPFIA1
rna-XM_012100800.4	14.0613	-7.23698	3.02853	-2.3896	0.0168666	0.480535	ADGRF4
rna-XM_042246390.1	14.0667	-7.23706	3.02853	-2.38963	0.0168654	0.480535	MAP4K4
rna-XM_042242803.1	14.9736	-1.81162	0.758257	-2.38919	0.0168858	0.480737	ASTN2
rna-XM_042250802.1	92.3891	3.02257	1.26534	2.38874	0.0169061	0.480737	PPIP5K2
rna-XM_042255436.1	98.7445	-6.75825	2.82906	-2.38887	0.0169003	0.480737	RAB11FIP4
rna-XM_004014961.5	72.2538	0.462019	0.193452	2.38829	0.0169271	0.481027	SPATA2L
rna-XM_042230207.1	13.175	7.2326	3.02884	2.38791	0.0169446	0.481061	ZNF335
rna-XM_042247028.1	3.21117	-5.103	2.13712	-2.38779	0.0169499	0.481061	R3HDM2
rna-XM_042238040.1	13.1645	7.23081	3.02885	2.38732	0.0169719	0.481199	SYTL2
rna-XM_042245154.1	33.2508	-3.68448	1.54342	-2.38722	0.0169764	0.481199	ARF3
rna-XM_004010459.5	3876.07	0.194231	0.0814172	2.38562	0.0170501	0.481515	CHP1
rna-XM_012177982.3	17.3538	1.04479	0.437861	2.38612	0.0170274	0.481515	HNRNPM
rna-XM_027967592.2	13.1079	7.22415	3.02886	2.38511	0.0170741	0.481515	SMARCC2
rna-XM_042241427.1	13.1362	7.22697	3.02885	2.38604	0.0170308	0.481515	PLPP5
rna-XM_042242572.1	13.7798	-4.21347	1.76556	-2.38647	0.0170108	0.481515	NSDHL
rna-XM_042243563.1	13.9387	-7.22353	3.02855	-2.38514	0.0170724	0.481515	NEK1
rna-XM_042243641.1	13.9349	-7.22398	3.02855	-2.3853	0.0170654	0.481515	GULP1
rna-XM_042246641.1	351.894	0.44874	0.188099	2.38566	0.0170486	0.481515	HNRNPA1
rna-XM_027966906.2	15.7059	-1.41193	0.592311	-2.38376	0.0171366	0.482971	TMEM178A
rna-XM_004002871.4	13.0465	7.21833	3.02887	2.38318	0.0171639	0.483026	COL8A1
rna-XM_042231674.1	55.6234	2.45718	1.0311	2.38306	0.0171694	0.483026	NLRC5
rna-XM_042251556.1	43.4154	-1.3752	0.577151	-2.38273	0.0171846	0.483026	SEC31A
rna-XM_042254049.1	13.8723	-7.21698	3.02856	-2.38298	0.0171734	0.483026	TRAPPC9
rna-XM_042255250.1	13.0389	7.21647	3.02887	2.38256	0.0171928	0.483026	AKAP1
rna-XM_027973570.2	49.126	1.89101	0.79404	2.3815	0.0172423	0.484063	RNASEH2B
rna-XM_042240103.1	13.8201	-7.21194	3.02857	-2.3813	0.0172515	0.484063	CRAMP1
rna-XM_042230864.1	25.9177	2.80838	1.17951	2.38097	0.017267	0.484193	ZNF527
rna-XM_012184370.3	404.019	-1.40832	0.591676	-2.38022	0.0173022	0.48431	EPSTI1
rna-XM_027976494.2	59.2049	-1.64719	0.692043	-2.38019	0.0173038	0.48431	NINL
rna-XM_042245569.1	77.2035	4.40776	1.85182	2.38024	0.0173015	0.48431	LOC114108697
rna-XM_012105842.4	38.4326	0.864195	0.363366	2.3783	0.0173925	0.486182	C26H8orf48
rna-XM_042233995.1	50.7067	-0.863958	0.363256	-2.37837	0.0173892	0.486182	LOC101110090
rna-XM_004004628.5	13.7142	-7.20088	3.02859	-2.37764	0.017424	0.486504	CERS6
rna-XM_042236379.1	12.897	7.2015	3.0289	2.3776	0.0174259	0.486504	XCR1
rna-XM_004016311.5	414.832	-0.678392	0.285369	-2.37725	0.0174424	0.48666	PAAF1
rna-XM_004008077.4	132.172	-0.534299	0.224805	-2.37672	0.0174674	0.487052	AKR1B1
rna-XM_012113296.3	93.8211	2.08718	0.878412	2.37609	0.0174973	0.487581	PTBP3
rna-XM_042232180.1	130.986	-2.42408	1.02034	-2.37576	0.0175129	0.487618	PPP1R13L
rna-XM_042232886.1	152.546	2.36409	0.995185	2.37553	0.017524	0.487618	ATM
rna-XR_003588771.2	16.6633	0.998044	0.420164	2.37537	0.0175316	0.487618	LOC114113967
rna-XM_004009617.5	150.48	-0.629768	0.265263	-2.37413	0.0175904	0.487659	LOC101117763
rna-XM_027956344.2	83.0364	1.64768	0.693869	2.37463	0.0175666	0.487659	ZNF84
rna-XM_027967363.2	90.206	-1.81099	0.763007	-2.37349	0.0176207	0.487659	PRPF40B
rna-XM_027972454.2	1353.07	-0.569236	0.239771	-2.37408	0.0175927	0.487659	PTPRK
rna-XM_042230524.1	23.5686	-6.25245	2.63401	-2.37373	0.0176092	0.487659	KIAA1217
rna-XM_042244333.1	63.9267	-1.04558	0.44048	-2.37373	0.0176096	0.487659	AGFG1
rna-XM_042255336.1	13.6018	-7.18924	3.02861	-2.37378	0.0176072	0.487659	BCAS3
rna-XR_006057312.1	48.6739	-0.673135	0.283599	-2.37354	0.0176183	0.487659	LOC121817415
rna-XM_015093118.3	50.9201	-0.589934	0.248652	-2.37253	0.0176669	0.48833	GFRA2
rna-XM_042249754.1	43.2422	-6.55528	2.76274	-2.37275	0.0176563	0.48833	WIZ
rna-XM_042243782.1	22.4526	-0.602891	0.25415	-2.37218	0.0176834	0.48836	GALNT3
rna-XM_042250392.1	16.0352	6.34539	2.67507	2.37205	0.0176899	0.48836	ZFP62
rna-XM_027971848.2	268.463	-0.969849	0.408986	-2.37135	0.0177232	0.48837	DUT
rna-XM_042238873.1	42.2154	5.69243	2.40041	2.37144	0.0177191	0.48837	BTRC
rna-XM_042246650.1	13.5561	-7.18323	3.02862	-2.37179	0.0177023	0.48837	MAP3K12
rna-XM_042252099.1	124.331	1.02039	0.430567	2.36987	0.0177944	0.490029	NOX5
rna-XM_012105274.4	13.4712	-7.17466	3.02863	-2.36894	0.0178389	0.490345	FAM149B1
rna-XM_042236156.1	5.30932	-2.34768	0.990847	-2.36937	0.0178186	0.490345	DCAF1
rna-XR_006056712.1	34.6234	-1.2534	0.529066	-2.36908	0.0178322	0.490345	LOC101112122
rna-XM_004002876.5	700.579	-0.429166	0.181246	-2.36786	0.0178912	0.490872	TBC1D23
rna-XM_004012966.5	51.6859	-0.627081	0.264786	-2.36825	0.0178723	0.490872	MEOX1
rna-XM_042249081.1	124.066	-6.91817	2.92149	-2.36803	0.0178832	0.490872	RBM33
gene-LOC114118380	37.1016	-0.449882	0.190066	-2.36698	0.017934	0.491434	LOC114118380
rna-XM_004005059.5	321.076	-1.05959	0.447882	-2.36577	0.0179926	0.491434	LOC101123533
rna-XM_012185401.4	12.6063	7.16827	3.02896	2.36658	0.0179535	0.491434	PROCA1
rna-XM_027957818.2	12.588	7.16653	3.02897	2.366	0.0179815	0.491434	SLC6A6
rna-XM_027968720.2	13.376	-7.16442	3.02865	-2.36555	0.0180033	0.491434	CAMK2B
rna-XM_027971625.2	8.84044	-6.5667	2.77406	-2.36718	0.0179243	0.491434	SLC22A17
rna-XM_042238980.1	12.5553	7.16307	3.02897	2.36485	0.0180372	0.491434	SORBS1
rna-XM_042243773.1	10.3374	6.88267	2.91016	2.36504	0.0180279	0.491434	CERS6
rna-XM_042246528.1	45.2692	-1.37067	0.579539	-2.36511	0.0180246	0.491434	KRR1
rna-XM_042248811.1	21.8199	-2.62081	1.10815	-2.36504	0.0180279	0.491434	SMO
rna-XM_042255241.1	13.7659	-0.815776	0.344944	-2.36495	0.0180324	0.491434	LOC121820538
rna-XR_006055536.1	6.19475	-2.11153	0.892934	-2.36471	0.0180442	0.491434	LOC121816070
rna-XM_012130401.4	115.25	-0.516813	0.218579	-2.36443	0.0180581	0.491511	LOC105601854
rna-XM_042247464.1	1.51448	2.75746	1.16644	2.364	0.018079	0.491781	PLEKHA5
rna-XM_027969939.2	68.6556	-5.24246	2.21826	-2.36332	0.0181118	0.491872	MKNK2
rna-XM_027976031.2	13.3134	-7.15747	3.02866	-2.36325	0.0181156	0.491872	UBE2T
rna-XR_006057107.1	1.39481	-3.90731	1.65313	-2.36359	0.0180988	0.491872	LOC121817270
rna-XR_006059169.1	8.58014	6.61415	2.79912	2.36294	0.0181305	0.491979	PABPC4
gene-LOC114110846	1.65345	-2.80816	1.18879	-2.3622	0.0181668	0.492172	LOC114110846
rna-XM_027976325.2	477.91	-0.202143	0.0855631	-2.3625	0.0181521	0.492172	LOC101103178
rna-XM_042256280.1	36.1198	0.661596	0.280086	2.36212	0.0181708	0.492172	PGS1
rna-XM_042255370.1	13.3285	0.724182	0.306624	2.36179	0.0181871	0.492312	LOC121820546
rna-XM_027968877.2	12.4643	7.15142	3.029	2.36099	0.0182263	0.493074	BRAF
rna-XM_004016443.5	57.5854	1.16684	0.494557	2.35936	0.0183067	0.493151	ATG13
rna-XM_004016902.5	767.922	0.245038	0.103808	2.3605	0.0182503	0.493151	MCCC2
rna-XM_027960022.2	24.3809	-1.43622	0.608522	-2.36018	0.0182663	0.493151	ESRRA
rna-XM_042231987.1	11.0268	6.97508	2.95591	2.35971	0.0182893	0.493151	CD22
rna-XM_042244808.1	106.962	-1.568	0.664443	-2.35987	0.0182813	0.493151	CLCNKA
rna-XM_042247213.1	492.992	-1.52639	0.646917	-2.35948	0.0183005	0.493151	LOC105605770
rna-XM_042250986.1	18.7676	0.730563	0.30964	2.35939	0.0183048	0.493151	NDST1
rna-XM_042256688.1	128.637	-1.94672	0.82523	-2.35901	0.0183239	0.493315	NCOR1
rna-XM_027963330.2	13.1701	-7.14205	3.02869	-2.35814	0.018367	0.494109	IKBKG
rna-XM_042230577.1	12.3708	7.14162	3.02901	2.35774	0.0183867	0.494109	DCLRE1C
rna-XM_042257350.1	12.3752	7.1418	3.02901	2.3578	0.0183838	0.494109	NPHP4
rna-XM_015103690.3	273.974	-0.455639	0.193321	-2.35691	0.0184278	0.494758	PTPN2
rna-XM_027960643.2	13.1265	-7.13728	3.02869	-2.35655	0.0184455	0.494758	UBE2D1
rna-XM_042230205.1	4.24978	-4.89869	2.07893	-2.35635	0.0184553	0.494758	NEURL2
rna-XR_006056015.1	9.20681	6.71531	2.84958	2.3566	0.0184432	0.494758	LOC101110699
rna-XM_027977871.2	13.1084	-7.13505	3.0287	-2.35581	0.0184823	0.494884	CX3CL1
rna-XM_042237001.1	21.691	-0.846762	0.359408	-2.35599	0.0184736	0.494884	ZNF76
rna-XM_004004001.5	735.9	0.501882	0.213138	2.35472	0.0185364	0.49544	FKBP15
rna-XM_012103314.4	13.486	1.39305	0.591531	2.35499	0.0185232	0.49544	PIK3C3
rna-XM_042231008.1	13.0758	-7.13212	3.0287	-2.35484	0.0185306	0.49544	LOC101122884
rna-NM_001142509.1	40.9418	-0.525331	0.223173	-2.35392	0.0185767	0.495922	CDK2
rna-XM_012185293.4	133.063	-0.554725	0.235648	-2.35404	0.0185706	0.495922	NUF2
rna-XM_004018366.5	178.101	-1.31093	0.557015	-2.3535	0.0185977	0.496183	LOC101123588
rna-XM_042248280.1	11.8579	-6.99061	2.97106	-2.3529	0.0186275	0.496681	ST7
rna-XR_001042183.4	38.5647	-4.23884	1.80288	-2.35115	0.0187153	0.498725	MAP3K7
rna-XM_012095789.4	12.1561	7.11528	3.02907	2.349	0.0188239	0.499121	ZNF143
rna-XM_012120354.4	274.925	1.02652	0.436922	2.34943	0.0188024	0.499121	TGFBR1
rna-XM_015098597.3	12.157	7.11646	3.02906	2.34939	0.0188042	0.499121	CHRNE
rna-XM_042237515.1	19.1333	-1.98035	0.843102	-2.34888	0.0188298	0.499121	DUSP22
rna-XM_042241893.1	69.401	0.611636	0.260422	2.34863	0.0188424	0.499121	RBM3
rna-XM_042242929.1	8.95828	-1.13049	0.481218	-2.34923	0.0188122	0.499121	TMEM38B
rna-XM_042243012.1	7.16099	-1.44334	0.614309	-2.34953	0.0187969	0.499121	IPPK
rna-XM_042245446.1	9.69519	-6.69984	2.85253	-2.34874	0.0188371	0.499121	INPP5E
rna-XM_042255082.1	12.1836	7.11933	3.02906	2.35034	0.0187561	0.499121	MCF2L
rna-XM_042257249.1	7.04801	6.32948	2.69321	2.35016	0.0187651	0.499121	MTHFR
rna-XM_012189157.4	20.2966	-2.30618	0.982566	-2.34709	0.0189205	0.499764	TGIF2
rna-XM_015093530.3	7.44516	-6.31872	2.69229	-2.34697	0.0189269	0.499764	GPBAR1
rna-XM_027977677.2	1113.01	0.926514	0.394717	2.34729	0.0189107	0.499764	MBTPS1
rna-XM_042256210.1	375.699	-1.21184	0.51626	-2.34735	0.0189074	0.499764	LOC101108669
rna-XM_042257247.1	9.30761	2.47565	1.05485	2.34692	0.0189291	0.499764	MTHFR
rna-XR_006056315.1	90.6968	-0.976033	0.415895	-2.34683	0.018934	0.499764	LOC114118386
rna-XM_042248896.1	85.1833	1.94297	0.828282	2.34578	0.0189874	0.500773	LOC101105324
rna-XM_042255117.1	12.0637	7.10513	3.02909	2.34563	0.0189947	0.500773	UPF3A
rna-XM_004004111.5	316.995	-0.473688	0.201986	-2.34515	0.0190193	0.501122	C2H9orf64
rna-XM_042234894.1	75.5454	-2.10797	0.898951	-2.34492	0.0190311	0.501137	GNB1L
rna-XM_004006021.5	19.3376	0.62025	0.264977	2.34077	0.0192439	0.502965	SULT6B1
rna-XM_004008980.5	1547.83	0.202105	0.0862955	2.34201	0.01918	0.502965	DCTN4
rna-XM_012183520.3	471.602	2.52345	1.07735	2.34228	0.0191661	0.502965	ST3GAL1
rna-XM_027962561.2	6.11703	6.12592	2.6171	2.34073	0.0192461	0.502965	RNF122
rna-XM_042233366.1	25.6819	-0.596117	0.254722	-2.34027	0.01927	0.502965	PRR5L
rna-XM_042242715.1	3.17025	-2.5045	1.07016	-2.34031	0.0192678	0.502965	LOC121818520
rna-XM_042247679.1	283.077	-0.876498	0.37416	-2.34258	0.0191511	0.502965	WNK1
rna-XM_042248006.1	11.9314	7.08919	3.02912	2.34035	0.0192659	0.502965	ADAMTS13
rna-XM_042249984.1	9.60111	-6.68603	2.85481	-2.34203	0.0191794	0.502965	ARHGEF18
rna-XM_042253445.1	19.3042	4.74625	2.02675	2.34181	0.0191905	0.502965	PTPRK
rna-XM_042254756.1	12.7168	-7.09165	3.02878	-2.34142	0.0192104	0.502965	INTS6
rna-XM_042255785.1	4.40004	-4.95148	2.11472	-2.34144	0.0192097	0.502965	ARHGEF11
rna-XM_042255838.1	12.7498	-7.09541	3.02877	-2.34267	0.0191462	0.502965	SLC35B1
rna-XM_042256062.1	30.0615	2.13661	0.912762	2.34082	0.0192413	0.502965	TMUB2
rna-XM_042256600.1	8.02856	-6.42815	2.74452	-2.34218	0.0191716	0.502965	YBX2
rna-XM_042240459.1	14.9934	4.07822	1.74373	2.3388	0.0193459	0.50465	BAIAP2L1
rna-XM_042243026.1	40.5823	2.09254	0.89481	2.33853	0.0193598	0.504717	ZNF782
rna-XR_006059956.1	204.764	-0.970298	0.414983	-2.33817	0.0193787	0.504912	LOC114114877
rna-XM_027968848.2	55.9501	-0.950924	0.40705	-2.33614	0.0194841	0.506177	PTN
rna-XM_027975804.2	7.01607	-6.23351	2.66779	-2.33659	0.0194608	0.506177	MXRA8
rna-XM_042235753.1	33.1236	0.620237	0.265449	2.33656	0.0194623	0.506177	NEK10
rna-XM_042238676.1	101.658	4.86444	2.08212	2.33629	0.019476	0.506177	PCGF5
rna-XM_042238746.1	7.40932	-6.31218	2.70186	-2.33623	0.0194791	0.506177	NFKB2
rna-XM_042234717.1	20.6346	5.09443	2.18149	2.3353	0.0195276	0.506715	USP30
rna-XM_042243340.1	22.3734	2.51698	1.07773	2.33544	0.0195205	0.506715	NMRK1
rna-XR_006056178.1	7179.94	1.38292	0.592303	2.33482	0.0195526	0.507068	LOC121816515
rna-TRNAC-ACA-19	1.17394	-2.91819	1.25003	-2.3345	0.0195697	0.507216	NM_001009276.1
rna-XM_027972833.2	16.7049	2.15059	0.921441	2.33394	0.0195987	0.507377	DENND3
rna-XM_042236449.1	7.94051	-6.41184	2.74702	-2.33411	0.0195902	0.507377	CEP70
rna-XM_027959310.2	11.875	-1.58654	0.680012	-2.33311	0.0196423	0.507411	NRXN2
rna-XM_027960908.2	12.5026	-7.06639	3.02882	-2.33305	0.0196456	0.507411	TCF4
rna-XM_042235463.1	3.10516	-3.80835	1.6322	-2.33326	0.0196343	0.507411	VRK1
rna-XM_042243579.1	6.52231	6.21664	2.66404	2.33354	0.0196198	0.507411	NIPA2
rna-XM_015097483.3	11.7124	7.06269	3.02917	2.33156	0.019724	0.508342	SYNE1
rna-XM_027959256.2	19.4819	2.23715	0.959415	2.33179	0.0197117	0.508342	SYT7
rna-XM_042233089.1	99.9385	-0.481469	0.206468	-2.33193	0.0197045	0.508342	TUB
rna-XM_042238728.1	11.7126	7.0625	3.02917	2.33149	0.0197273	0.508342	FBXW4
rna-XM_042246098.1	12.5546	-3.00698	1.28985	-2.33126	0.0197394	0.508359	CCDC138
rna-XM_027958691.2	284.605	-0.252418	0.108295	-2.33084	0.019762	0.508646	NQO2
rna-NM_001134306.1	6.7688	1.65063	0.708301	2.33041	0.0197844	0.508896	HPCAL1
rna-XM_015102791.3	251.346	1.14709	0.492266	2.33022	0.0197946	0.508896	BAG6
rna-XM_015098649.3	7.26824	-6.28416	2.69719	-2.32989	0.019812	0.50905	STX8
rna-XM_012190050.4	71.9687	0.98987	0.424954	2.32936	0.0198402	0.50948	IST1
rna-XM_042236004.1	2.68406	3.66976	1.57581	2.3288	0.0198694	0.509936	PXK
rna-XM_012179431.4	59.7202	-2.60055	1.11704	-2.32808	0.0199077	0.510069	CAMK2D
rna-XM_027961602.2	197.862	0.528881	0.227222	2.3276	0.0199336	0.510069	FBXL19
rna-XM_027979698.2	11.6259	7.05206	3.0292	2.32803	0.0199104	0.510069	ATG13
rna-XM_042230012.1	26.3137	-4.56768	1.9619	-2.32819	0.0199021	0.510069	ASXL1
rna-XM_042248638.1	19.3609	1.24902	0.536652	2.32743	0.0199425	0.510069	CPVL
rna-XM_042256829.1	30.2662	0.480697	0.206555	2.32721	0.0199539	0.510069	LOC121820716
rna-XR_003588143.2	32.4444	-0.832343	0.357659	-2.3272	0.0199548	0.510069	LOC105608356
rna-XM_042252997.1	12.3394	-7.04785	3.02886	-2.3269	0.0199705	0.510177	SLC22A15
rna-XM_027958192.2	12.3228	-7.04611	3.02886	-2.32632	0.0200012	0.510668	MAGI1
rna-XM_012095558.4	326.469	0.314878	0.135377	2.32594	0.0200217	0.510897	SLC37A4
gene-LOC114108712	205.349	-1.94907	0.838622	-2.32414	0.0201182	0.511092	LOC114108712
rna-XM_012116929.4	164.457	1.409	0.606227	2.32421	0.020114	0.511092	TUT7
rna-XM_027966949.2	603.944	-1.01899	0.438319	-2.32477	0.0200842	0.511092	LTBP1
rna-XM_027968699.2	392.87	-0.283503	0.121985	-2.32408	0.0201212	0.511092	CCM2
rna-XM_027973518.2	24.8311	0.901837	0.387918	2.32481	0.0200819	0.511092	NAA16
rna-XM_027978331.2	213.99	0.711668	0.306158	2.32452	0.0200979	0.511092	MAP3K10
rna-XM_042229710.1	11.8311	2.7698	1.19126	2.32511	0.0200663	0.511092	PITRM1
rna-XM_042238183.1	12.265	-7.03935	3.02887	-2.32408	0.020121	0.511092	RAD9A
rna-XM_027961127.2	872.566	0.907048	0.390394	2.32342	0.0201567	0.511702	TECPR1
rna-XM_042245917.1	12.2347	-7.03576	3.02888	-2.32289	0.020185	0.512127	EIF2B4
rna-XM_027974200.2	424.096	0.599903	0.258314	2.32238	0.0202126	0.512537	SOCS3
rna-XM_042229561.1	6.4304	6.19768	2.67009	2.32116	0.0202784	0.513121	CREM
rna-XM_042230716.1	6.60033	-6.14597	2.64731	-2.32159	0.0202548	0.513121	FLT3LG
rna-XM_042248655.1	1769.46	-0.153783	0.066246	-2.3214	0.0202653	0.513121	HNRNPA2B1
rna-XM_042250118.1	11.4516	7.03051	3.02924	2.32088	0.0202933	0.513121	PLIN3
rna-XM_042256071.1	6.88115	-6.20496	2.67349	-2.32092	0.0202909	0.513121	UBTF
rna-XM_027967516.2	3.04122	-3.17093	1.3668	-2.31996	0.0203431	0.514087	LOC101119634
rna-XM_042231736.1	248.554	1.09064	0.470259	2.31923	0.0203826	0.514795	CNOT1
rna-XM_027969378.2	17.557	-0.792432	0.34178	-2.31855	0.0204197	0.515438	CERS1
rna-XM_042232204.1	11.377	7.02028	3.02926	2.31749	0.0204771	0.516361	SYMPK
rna-XM_042243163.1	12.843	-2.68243	1.15749	-2.31745	0.0204795	0.516361	FHIP2B
rna-XM_027958025.2	43.0665	3.08101	1.33003	2.31649	0.0205314	0.517085	GORASP1
rna-XM_027974946.2	984.27	0.826364	0.356717	2.31658	0.0205264	0.517085	CHD3
gene-LOC114114814	1.43069	-2.56977	1.10953	-2.31608	0.0205537	0.517354	LOC114114814
gene-LOC101120503	1.32477	3.91723	1.69195	2.31522	0.0206011	0.517557	LOC101120503
rna-XM_004012597.5	12.0355	-7.01242	3.02892	-2.31515	0.0206045	0.517557	INCA1
rna-XM_004015263.5	317.804	0.528639	0.228347	2.31507	0.0206091	0.517557	C14H19orf54
rna-XM_012110622.4	5186.31	-0.478812	0.206842	-2.31487	0.0206199	0.517557	STAT1
rna-XM_042251275.1	15.7986	-4.13632	1.78633	-2.31554	0.0205836	0.517557	SOD3
rna-XM_012105175.3	1734.68	0.525782	0.227177	2.31441	0.020645	0.517603	HNRNPH3
rna-XM_042245560.1	7.75521	-6.37715	2.75528	-2.31452	0.0206392	0.517603	LOC114108697
rna-XM_027973459.2	33.8456	-2.36277	1.0212	-2.31371	0.0206835	0.518274	SLURP1
rna-XM_027969885.2	11.9885	-7.00704	3.02893	-2.31337	0.0207023	0.518455	MFSD12
rna-XM_012094882.4	16.495	1.04589	0.452197	2.31291	0.0207278	0.518509	LOC101115820
rna-XM_012180294.4	31.8601	4.5691	1.97546	2.31293	0.0207267	0.518509	ARHGAP24
rna-XM_004005619.5	125.581	-0.616675	0.266656	-2.31263	0.0207431	0.518602	SH2D3C
rna-XM_042242300.1	2.31488	2.82294	1.22083	2.31231	0.0207607	0.518749	GRIPAP1
rna-XM_012136806.4	177.095	1.75444	0.759465	2.3101	0.0208826	0.519213	LOC101113467
rna-XM_027974734.2	50.2843	-1.35302	0.585384	-2.31133	0.0208147	0.519213	ABCC3
rna-XM_042230038.1	11.2123	6.99839	3.02931	2.31022	0.0208757	0.519213	C1H21orf91
rna-XM_042234223.1	428.835	-1.9501	0.844174	-2.31007	0.0208843	0.519213	LOC121816895
rna-XM_042239095.1	14.0212	-3.43531	1.4865	-2.311	0.0208326	0.519213	STAMBPL1
rna-XM_042241721.1	474.102	2.06852	0.895115	2.3109	0.0208385	0.519213	HUWE1
rna-XM_042245614.1	168.943	0.727922	0.314979	2.31102	0.0208318	0.519213	SH3D21
rna-XM_042256304.1	5.6991	-5.33445	2.30914	-2.31014	0.0208802	0.519213	SEPTIN9
rna-XM_042257246.1	11.1994	6.99812	3.02931	2.31014	0.0208805	0.519213	MTHFR
rna-XM_004018837.5	329.756	0.262092	0.113477	2.30965	0.0209073	0.519496	MRPL2
rna-XM_004019447.4	433.228	0.436767	0.18919	2.30862	0.0209648	0.520633	HTATIP2
rna-XM_015098545.3	11.1341	6.98989	3.02933	2.30741	0.0210321	0.520781	FLOT2
rna-XM_027974599.2	8.41432	1.50737	0.653085	2.30807	0.0209953	0.520781	PRUNE1
rna-XM_027976203.2	11.152	6.99078	3.02933	2.3077	0.0210158	0.520781	RBBP5
rna-XM_027976460.2	9.43236	2.78753	1.20816	2.30725	0.021041	0.520781	CBLN4
rna-XM_042236517.1	57.7956	-3.8577	1.67189	-2.30739	0.0210331	0.520781	CSRNP1
rna-XM_042240434.1	6.53591	-6.13123	2.65649	-2.30802	0.0209978	0.520781	C24H7orf50
rna-NM_001174114.2	2.2966	-4.63038	2.00722	-2.30686	0.0210625	0.521026	SERPINE1
rna-XM_012104152.4	42.0366	-0.652281	0.282852	-2.30609	0.0211058	0.521805	CEP20
rna-XM_042254050.1	116.387	2.31819	1.00549	2.30553	0.0211371	0.522289	TRAPPC9
rna-XM_012105816.4	13.5634	3.17861	1.37917	2.30473	0.0211817	0.522731	SLC7A2
rna-XM_042231184.1	69.5813	1.0111	0.438733	2.30458	0.0211902	0.522731	LOC114117925
rna-XM_042251305.1	102.651	-5.16451	2.24085	-2.3047	0.0211831	0.522731	ARAP2
rna-XM_042233743.1	7.91074	6.49673	2.81947	2.30424	0.0212093	0.522913	CENPK
rna-XM_015101936.3	721.867	-0.298939	0.129769	-2.30362	0.0212438	0.523473	ZFAND6
gene-LOC101111456	25.5707	0.627694	0.272661	2.3021	0.0213295	0.524032	LOC101111456
gene-LOC114117557	8.77261	1.09644	0.476306	2.30196	0.0213372	0.524032	LOC114117557
rna-XM_027959983.2	11.0221	6.97511	3.02936	2.3025	0.0213068	0.524032	SIRT3
rna-XM_042230255.1	11.0188	6.97371	3.02936	2.30204	0.0213331	0.524032	STAU1
rna-XM_042240018.1	4.76086	-4.45471	1.93453	-2.30273	0.021294	0.524032	RABGEF1
rna-XM_042253327.1	6.66019	6.24806	2.71416	2.30202	0.0213339	0.524032	FIG4
rna-XM_042250547.1	1059.82	-0.183933	0.079921	-2.30144	0.0213668	0.524181	SMAD5
rna-XM_042253908.1	11.0087	6.97226	3.02937	2.30156	0.0213601	0.524181	FBXL6
rna-XM_042233426.1	67.8593	1.45677	0.633162	2.30078	0.0214041	0.524808	PHF21A
rna-XM_027964970.2	496.15	-0.621727	0.27032	-2.29996	0.0214502	0.525439	NMI
[truncated: 54,486 more rows]

## Sheet: TableS4
Table S4. Ballgown analysis of differential transcript expression from abomasum comparing H. contortus susceptible and resistant Morada Nova sheep. Differentially expressed transcripts (q-value < 0.1 and |FC| > 1.5) are in bold.
[truncated: 76,901 more rows]

[truncated: 13 more sheets: TableS5, TableS6, TableS11, TableS12, TableS13, TableS14, TableS15, TableS16, TableS17, TableS18, TableS19, TableS20, TableS21]
